# Supplementary material for: MutRank: an R shiny web-application for exploratory targeted mutual rank-based coexpression analyses integrated with user-provided supporting information
Source: PeerJ. 2020 Nov 9;8:e10264. doi: 10.7717/peerj.10264 (PMC7659623; doi:10.7717/peerj.10264)
Supplement: Supplemental Information 4 [file peerj-08-10264-s004.xlsx]

## Sheet: Table 2. Annotations
Supplementary Table 2 - Example gene annotaions
Citation:	Goodstein, David M., Shengqiang Shu, Russell Howson, Rochak Neupane, Richard D. Hayes, Joni Fazo, Therese Mitros, William Dirks, Uffe Hellsten, Nicholas Putnam, and Daniel S. Rokhsar. 2012. “Phytozome: A Comparative Platform for Green Plant Genomics.” Nucleic Acids Research 40(D1):D1178–86.
DOI:	doi: 10.1093/nar/gkr944
Link:	https://phytozome.jgi.doe.gov/pz/portal.html
File:	Zmays_284_Ensembl-18_2010-01-MaizeSequence.annotation_info.txt
Notes:	(1) Genes with no assigned annotations were removed
gene	rice-defline
AC148152.3_FG001	expressed protein
AC148152.3_FG005	1-aminocyclopropane-1-carboxylate oxidase homolog 4, putative, expressed
AC148152.3_FG006	chalcone synthase, putative, expressed
AC148152.3_FG008	Os11bglu36 SFR2 homologue, expressed
AC148167.6_FG001	targeting protein for Xklp2, putative, expressed
AC149475.2_FG002	nicotiana lesion-inducing like, putative, expressed
AC149475.2_FG003	peptidase, T1 family, putative, expressed
AC149475.2_FG004	tRNA synthetase class I, putative, expressed
AC149475.2_FG005	ZOS3-03 - C2H2 zinc finger protein, expressed
AC149475.2_FG007	acetyltransferase, GNAT family, putative, expressed
AC149810.2_FG003	ubiquitin carboxyl-terminal hydrolase domain containing protein, expressed
AC149810.2_FG004	expressed protein
AC149810.2_FG008	protein kinase family protein, putative, expressed
AC149818.2_FG001	ras-related protein, putative, expressed
AC149818.2_FG004	cyclin-dependent kinases regulatory subunit 1, putative, expressed
AC149818.2_FG005	expressed protein
AC149818.2_FG006	ubiquitin-conjugating enzyme, putative, expressed
AC149818.2_FG007	expressed protein
AC149818.2_FG008	ZOS3-01 - C2H2 zinc finger protein, expressed
AC149818.2_FG009	DUF260 domain containing protein, putative, expressed
AC149828.2_FG002	peptidase, T1 family, putative, expressed
AC149828.2_FG004	expressed protein
AC149829.2_FG002	expressed protein
AC149829.2_FG003	OsNucAP1 - Putative Nucleoporin Autopeptidase homologue, expressed
AC149829.2_FG004	bHLH family protein, putative, expressed
AC149829.2_FG006	OsFBK12 - F-box domain and kelch repeat containing protein, expressed
AC150739.3_FG001	DNA binding protein, putative, expressed
AC152495.1_FG002	rp1, putative, expressed
AC152495.1_FG003	rp1, putative, expressed
AC152495.1_FG005	phosphatidylinositol transfer, putative, expressed
AC152495.1_FG006	SWI/SNF-related matrix-associated actin-dependent regulator of chromatin subfamily A, putative, expressed
AC152495.1_FG010	rp1, putative, expressed
AC152495.1_FG011	expressed protein
AC152495.1_FG012	calcium-transporting ATPase, endoplasmic reticulum-type, putative, expressed
AC152495.1_FG013	zinc knuckle family protein, expressed
AC152495.1_FG015	disease resistance RPP13-like protein 1, putative, expressed
AC152495.1_FG017	rp1, putative, expressed
AC155352.2_FG001	GA17271-PA, putative, expressed
AC155352.2_FG009	harpin-induced protein 1 domain containing protein, expressed
AC155352.2_FG010	LTPL116 - Protease inhibitor/seed storage/LTP family protein precursor, expressed
AC155376.2_FG004	formin-like protein 1 precursor, putative, expressed
AC155376.2_FG005	Os1bglu4 - beta-glucosidase-like protein without signal sequence, expressed
AC155377.1_FG001	myosin, putative, expressed
AC155377.1_FG002	aspartic proteinase-like protein 2 precursor, putative, expressed
AC155390.2_FG002	pentatricopeptide, putative, expressed
AC155434.2_FG001	hydrolase, alpha/beta fold family domain containing protein, expressed
AC155434.2_FG003	retrotransposon protein, putative, SINE subclass, expressed
AC155434.2_FG004	EMB1011, putative, expressed
AC155434.2_FG005	Myb transcription factor, putative, expressed
AC155434.2_FG006	expressed protein
AC155496.2_FG009	cullin, putative, expressed
AC155610.2_FG007	transferase family protein, putative, expressed
AC155610.2_FG009	LSM domain containing protein, expressed
AC155622.2_FG001	coatomer alpha subunit, putative, expressed
AC155622.2_FG004	coatomer alpha subunit, putative, expressed
AC155624.2_FG006	protein phosphatase 2C, putative, expressed
AC155624.2_FG008	translation initiation factor IF-2, putative, expressed
AC155624.2_FG011	expressed protein
AC159612.1_FG007	glucan endo-1,3-beta-glucosidase precursor, putative, expressed
AC165171.2_FG002	WRKY17, expressed
AC165178.2_FG001	expressed protein
AC165178.2_FG002	retrotransposon protein, putative, unclassified, expressed
AC165178.2_FG004	MYB family transcription factor, putative, expressed
AC166636.1_FG007	expressed protein
AC166636.1_FG008	ras-related protein, putative, expressed
AC166636.1_FG009	pumilio-family RNA binding repeat domain containing protein, expressed
AC177820.3_FG007	RNA recognition motif containing protein, expressed
AC177820.3_FG009	tetratricopeptide repeat domain containing protein, putative, expressed
AC177821.2_FG003	expressed protein
AC177821.2_FG005	oxidoreductase, aldo/keto reductase family protein, putative, expressed
AC177833.2_FG001	expressed protein
AC177838.2_FG002	retrotransposon protein, putative, unclassified, expressed
AC177838.2_FG012	NAD dependent epimerase/dehydratase family domain containing protein, expressed
AC177838.2_FG018	retrotransposon protein, putative, unclassified, expressed
AC177840.3_FG005	ZOS1-20 - C2H2 zinc finger protein, expressed
AC177850.2_FG005	expressed protein
AC177860.4_FG002	methyltransferase domain containing protein, putative, expressed
AC177889.2_FG006	ASC1, putative, expressed
AC177893.3_FG003	trp repressor/replication initiator, putative, expressed
AC177893.3_FG005	potassium transporter, putative, expressed
AC177897.2_FG002	expressed protein
AC177897.2_FG020	octicosapeptide/Phox/Bem1p, putative, expressed
AC177897.2_FG021	T-complex protein, putative, expressed
AC177897.2_FG022	L-ascorbate oxidase homolog precursor, putative, expressed
AC177897.2_FG025	SNF2 family N-terminal domain containing protein, expressed
AC177897.2_FG029	ATP binding protein, putative, expressed
AC177899.2_FG009	pentatricopeptide, putative, expressed
AC177899.2_FG012	ulp1 protease family, C-terminal catalytic domain containing protein, expressed
AC177901.3_FG002	expressed protein
AC177901.3_FG004	retrotransposon protein, putative, LINE subclass, expressed
AC177903.4_FG002	expressed protein
AC177908.3_FG002	glycosyl transferase 8 domain containing protein, putative, expressed
AC177919.3_FG004	tetratricopeptide repeat domain containing protein, expressed
AC177924.2_FG001	expressed protein
AC177924.2_FG003	expressed protein
AC177925.2_FG003	expressed protein
AC177926.2_FG003	expressed protein
AC177933.2_FG002	expressed protein
AC177933.2_FG005	MLO domain containing protein, putative, expressed
AC177936.6_FG008	cullin, putative, expressed
AC177940.4_FG006	expressed protein
AC177941.3_FG001	expressed protein
AC177941.3_FG006	expressed protein
AC182110.4_FG002	patatin, putative, expressed
AC182413.4_FG002	expressed protein
AC182439.4_FG004	ergosterol biosynthetic protein 28, putative, expressed
AC182482.3_FG003	cation efflux family protein, putative, expressed
AC182603.4_FG003	expressed protein
AC182615.4_FG002	expressed protein
AC182615.4_FG003	retrotransposon protein, putative, unclassified, expressed
AC182617.3_FG001	diaminopimelate epimerase, chloroplast precursor, putative, expressed
AC182622.3_FG005	harpin-induced protein 1 domain containing protein, expressed
AC182819.4_FG002	expressed protein
AC182826.4_FG003	expressed protein
AC182830.3_FG003	lipase, putative, expressed
AC182830.3_FG004	receptor-like protein kinase 2 precursor, putative, expressed
AC182833.3_FG013	oxidoreductase, short chain dehydrogenase/reductase family protein, putative, expressed
AC183307.5_FG001	late embryogenesis abundant domain-containing protein, putative, expressed
AC183315.4_FG006	armadillo/beta-catenin repeat family protein, putative, expressed
AC183412.5_FG005	expressed protein
AC183503.2_FG003	hydrolase, putative, expressed
AC183511.4_FG003	DNA repair metallo-beta-lactamase, putative, expressed
AC183514.3_FG005	protein kinase family protein, putative, expressed
AC183514.3_FG006	RNA recognition motif containing protein, putative, expressed
AC183518.2_FG001	zinc knuckle family protein, expressed
AC183521.2_FG006	expressed protein
AC183590.4_FG001	glutamate--cysteine ligase, chloroplast precursor, putative, expressed
AC183656.2_FG005	retrotransposon protein, putative, unclassified, expressed
AC183782.3_FG002	expressed protein
AC183888.4_FG006	thioredoxin, putative, expressed
AC183888.4_FG008	SNF2 family N-terminal domain containing protein, expressed
AC183895.3_FG003	AMP-binding domain containing protein, expressed
AC183917.3_FG004	2-nitropropane dioxygenase family, putative, expressed
AC183928.4_FG001	expressed protein
AC183928.4_FG006	eukaryotic aspartyl protease domain containing protein, expressed
AC183932.3_FG004	expressed protein
AC183932.3_FG007	CSLC10 - cellulose synthase-like family C, expressed
AC183938.4_FG004	DNA-directed RNA polymerase 3A, chloroplast precursor, putative, expressed
AC183938.4_FG011	expressed protein
AC183950.2_FG002	ZOS7-07 - C2H2 zinc finger protein, expressed
AC183950.2_FG003	ZOS5-12 - C2H2 zinc finger protein, expressed
AC183950.2_FG004	harpin-induced protein 1 domain containing protein, expressed
AC183950.2_FG005	PPR repeat containing protein, expressed
AC184112.4_FG010	DUF567 domain containing protein, putative, expressed
AC184130.4_FG001	amino acid permease family protein, putative, expressed
AC184130.4_FG005	fasciclin-like arabinogalactan precursor protein, putative, expressed
AC184130.4_FG012	SNI1, putative, expressed
AC184131.5_FG010	CESA8 - cellulose synthase, expressed
AC184133.3_FG001	expressed protein
AC184133.3_FG004	OsMADS13 - MADS-box family gene with MIKCc type-box, expressed
AC184164.2_FG004	ZOS7-07 - C2H2 zinc finger protein, expressed
AC184164.2_FG006	3-5 exonuclease domain-containing protein, putative, expressed
AC184165.4_FG001	inorganic H+ pyrophosphatase, putative, expressed
AC184169.3_FG001	tetratricopeptide repeat domain containing protein, expressed
AC184172.3_FG001	ulp1 protease family, C-terminal catalytic domain containing protein, expressed
AC184694.3_FG007	mitochondrial prohibitin complex protein 1, putative, expressed
AC184699.3_FG005	expressed protein
AC184764.3_FG003	carrier, putative, expressed
AC184770.3_FG001	nonsense-mediated mRNA decay protein 3, putative, expressed
AC184772.3_FG001	polygalacturonase, putative, expressed
AC184775.2_FG002	expressed protein
AC184776.3_FG003	harpin-induced protein 1 domain containing protein, expressed
AC184794.2_FG003	peptide transporter PTR2, putative, expressed
AC184831.3_FG003	anthocyanidin 5,3-O-glucosyltransferase, putative, expressed
AC184831.3_FG005	GATA zinc finger domain containing protein, expressed
AC184831.3_FG008	GATA zinc finger domain containing protein, expressed
AC184834.3_FG007	cysteine-rich receptor-like protein kinase 8 precursor, putative, expressed
AC184835.3_FG003	amino acid transporter, putative, expressed
AC184854.4_FG001	AMP-binding domain containing protein, expressed
AC184854.4_FG003	AP2-associated protein kinase 1, putative, expressed
AC184866.3_FG007	START domain containing protein, expressed
AC184871.2_FG002	MCM5 - Putative minichromosome maintenance MCM complex subunit 5, expressed
AC185108.3_FG007	hAT dimerisation domain-containing protein, putative, expressed
AC185108.3_FG008	ankyrin repeat-containing protein, putative, expressed
AC185108.3_FG010	expressed protein
AC185108.3_FG011	ZOS3-11 - C2H2 zinc finger protein, expressed
AC185111.3_FG004	MYB family transcription factor, putative, expressed
AC185121.3_FG001	CESA1 - cellulose synthase, expressed
AC185126.3_FG006	zinc finger, C3HC4 type domain containing protein, expressed
AC185128.2_FG002	STE_MEK_ste7_MAP2K.7 - STE kinases include homologs to sterile 7, sterile 11 and sterile 20 from yeast, expressed
AC185130.2_FG004	peptidase, putative, expressed
AC185130.2_FG005	expressed protein
AC185213.3_FG003	pentatricopeptide, putative, expressed
AC185217.3_FG002	chaperone protein dnaJ 10, putative, expressed
AC185217.3_FG004	expressed protein
AC185224.4_FG005	laccase-15 precursor, putative, expressed
AC185226.4_FG001	tetratricopeptide repeat, putative, expressed
AC185226.4_FG006	transposon protein, putative, unclassified, expressed
AC185254.4_FG002	ABC transporter, ATP-binding protein, putative, expressed
AC185254.4_FG004	harpin-induced protein 1 domain containing protein, expressed
AC185254.4_FG005	copper-transporting ATPase PAA1, putative, expressed
AC185265.3_FG003	expressed protein
AC185272.3_FG005	lectin-like receptor kinase, putative, expressed
AC185300.4_FG002	expressed protein
AC185304.4_FG010	expressed protein
AC185306.4_FG004	protein kinase, putative, expressed
AC185322.3_FG008	OsFBX278 - F-box domain containing protein, expressed
AC185322.3_FG011	expressed protein
AC185413.3_FG005	OsSub55 - Putative Subtilisin homologue, expressed
AC185415.3_FG005	zinc finger Ran-binding domain-containing protein 2, putative, expressed
AC185422.3_FG005	cysteine-rich repeat secretory protein 15 precursor, putative, expressed
AC185434.4_FG004	OsMADS31 - MADS-box family gene with MIKCc type-box, expressed
AC185436.3_FG004	ulp1 protease family protein, putative, expressed
AC185442.3_FG002	TOO MANY MOUTHS precursor, putative, expressed
AC185443.3_FG004	expressed protein
AC185453.3_FG002	harpin-induced protein 1 domain containing protein, expressed
AC185460.3_FG004	zinc finger, C3HC4 type domain containing protein, expressed
AC185466.3_FG001	SEC6, putative, expressed
AC185468.3_FG003	eukaryotic translation initiation factor 2 subunit beta, putative, expressed
AC185471.3_FG005	dynein light chain type 1 domain containing protein, expressed
AC185478.4_FG005	expressed protein
AC185498.3_FG007	aminoacyl-tRNA synthetase, putative, expressed
AC185500.3_FG004	glycosyl hydrolase family 3 protein, putative, expressed
AC185500.3_FG005	ubiquitin interaction motif family protein, expressed
AC185501.3_FG001	kinesin motor domain containing protein, putative, expressed
AC185501.3_FG006	expressed protein
AC185504.4_FG008	protein kinase family protein, putative, expressed
AC185519.3_FG002	CESA1 - cellulose synthase, expressed
AC185531.2_FG001	OsCML30 - Calmodulin-related calcium sensor protein, expressed
AC185587.3_FG003	AMP-binding domain containing protein, expressed
AC185593.3_FG003	expressed protein
AC185596.3_FG014	FHA domain containing protein, putative, expressed
AC185603.4_FG007	IPP transferase, putative, expressed
AC185611.3_FG001	EGG APPARATUS-1, putative, expressed
AC185612.3_FG002	nuclease PA3, putative, expressed
AC185625.4_FG004	potassium transporter, putative, expressed
AC185631.4_FG001	GTPase of unknown function domain containing protein, putative, expressed
AC185642.4_FG001	AGAP000425-PA, putative, expressed
AC185645.4_FG006	HEAT repeat family protein, putative, expressed
AC185648.3_FG001	mitotic checkpoint serine/threonine-protein kinase BUB1, putative, expressed
AC185648.3_FG007	expressed protein
AC185649.2_FG003	AGAP000425-PA, putative, expressed
AC185655.3_FG004	ZOS2-06 - C2H2 zinc finger protein, expressed
AC185655.3_FG005	ZOS4-08 - C2H2 zinc finger protein, expressed
AC185660.3_FG003	AGAP000425-PA, putative, expressed
AC185667.3_FG007	eukaryotic aspartyl protease domain containing protein, expressed
AC185668.3_FG001	polynucleotide phosphorylase, putative, expressed
AC186009.3_FG001	UDP-glucoronosyl/UDP-glucosyl transferase, putative, expressed
AC186028.3_FG003	expressed protein
AC186143.3_FG001	trehalose phosphatase, putative, expressed
AC186145.3_FG002	zinc finger, C3HC4 type domain containing protein, expressed
AC186147.3_FG008	glycosyltransferase, putative, expressed
AC186165.2_FG002	HIRAN domain containing protein, putative, expressed
AC186166.3_FG008	heavy-metal-associated domain-containing protein, putative, expressed
AC186166.3_FG015	ABC1 family domain containing protein, putative, expressed
AC186166.3_FG018	expressed protein
AC186195.4_FG001	expressed protein
AC186223.3_FG003	asparagine synthetase, putative, expressed
AC186231.4_FG002	TsetseEP precursor, putative, expressed
AC186233.3_FG007	expressed protein
AC186234.3_FG005	harpin-induced protein 1 domain containing protein, expressed
AC186284.3_FG007	expressed protein
AC186287.7_FG005	NLI interacting factor-like phosphatase, putative, expressed
AC186302.3_FG013	cis-zeatin O-glucosyltransferase, putative, expressed
AC186310.4_FG004	expressed protein
AC186322.4_FG003	MATE efflux family protein, putative, expressed
AC186329.3_FG009	tetratricopeptide repeat domain containing protein, expressed
AC186333.2_FG006	transcription initiation factor IIB, putative, expressed
AC186339.3_FG008	expressed protein
AC186379.3_FG001	PPR repeat containing protein, expressed
AC186412.4_FG012	homeobox domain containing protein, expressed
AC186419.4_FG002	GCN5-related N-acetyltransferase, putative, expressed
AC186420.3_FG002	HECT-domain domain containing protein, expressed
AC186493.4_FG002	zinc knuckle family protein, expressed
AC186500.3_FG001	copper methylamine oxidase precursor, putative, expressed
AC186516.3_FG003	harpin-induced protein 1 domain containing protein, expressed
AC186519.4_FG002	OsSAUR15 - Auxin-responsive SAUR gene family member
AC186522.3_FG003	tubby, putative, expressed
AC186524.3_FG005	HMG1/2, putative, expressed
AC186529.4_FG014	rubredoxin family protein, putative, expressed
AC186565.3_FG002	CRAL/TRIO domain containing protein, expressed
AC186573.3_FG002	expressed protein
AC186577.3_FG006	invertase/pectin methylesterase inhibitor family protein, putative, expressed
AC186579.3_FG007	RING finger protein 13, putative, expressed
AC186585.4_FG002	peptidyl-tRNA hydrolase, mitochondrial precursor protein, putative, expressed
AC186592.3_FG002	expressed protein
AC186602.4_FG003	expressed protein
AC186603.6_FG003	cytochrome P450, putative, expressed
AC186604.4_FG003	tRNA uridine 5-carboxymethylaminomethyl modification enzyme gidA, putative, expressed
AC186606.4_FG003	bZIP transcription factor domain containing protein, expressed
AC186607.3_FG003	FHA domain containing protein, putative, expressed
AC186623.5_FG003	retrotransposon protein, putative, unclassified, expressed
AC186626.4_FG004	cyclic nucleotide-gated ion channel 2, putative, expressed
AC186627.4_FG002	harpin-induced protein 1 domain containing protein, expressed
AC186663.3_FG006	expressed protein
AC186669.3_FG002	expressed protein
AC186684.4_FG001	GTP-binding protein, putative, expressed
AC186744.4_FG002	ribosomal L9, putative, expressed
AC186781.4_FG006	expressed protein
AC186782.4_FG001	EF hand family protein, putative, expressed
AC186782.4_FG003	GDSL-like lipase/acylhydrolase, putative, expressed
AC186785.4_FG002	expressed protein
AC186798.2_FG002	expressed protein
AC186800.3_FG005	retrotransposon protein, putative, unclassified, expressed
AC186802.4_FG002	cytochrome P450, putative, expressed
AC186808.4_FG004	ORC2 - Putative origin recognition complex subunit 2, expressed
AC186815.3_FG003	polypyrimidine tract-binding protein, putative, expressed
AC186884.3_FG005	expressed protein
AC186897.4_FG016	expressed protein
AC186902.4_FG009	DUF617 domain containing protein, expressed
AC186904.4_FG007	protein binding protein, putative, expressed
AC187032.5_FG003	ATMIN7, putative, expressed
AC187046.3_FG009	zinc knuckle family protein, expressed
AC187050.4_FG004	expressed protein
AC187055.3_FG006	tRNA synthetase class I, putative, expressed
AC187072.4_FG002	3-5 exonuclease domain-containing protein, putative, expressed
AC187073.4_FG007	expressed protein
AC187078.3_FG002	2-nitropropane dioxygenase family, putative, expressed
AC187080.3_FG006	zinc knuckle domain containing protein, expressed
AC187080.3_FG007	expressed protein
AC187082.3_FG002	cig3, putative, expressed
AC187082.3_FG003	basic helix-loop-helix protein, putative, expressed
AC187085.3_FG003	expressed protein
AC187088.3_FG002	guanylate kinase, putative, expressed
AC187094.4_FG002	2-phosphoglycerate kinase-related, putative, expressed
AC187098.4_FG011	PWWP domain containing protein, expressed
AC187099.5_FG005	zinc finger, RING-type, putative, expressed
AC187142.3_FG001	serine esterase family protein, putative, expressed
AC187157.4_FG001	AP2 domain containing protein, expressed
AC187157.4_FG002	MPPN domain containing protein, expressed
AC187157.4_FG005	START domain containing protein, expressed
AC187157.4_FG007	transporter family protein, putative, expressed
AC187207.3_FG006	expressed protein
AC187212.3_FG004	AAA-type ATPase family protein, putative, expressed
AC187212.3_FG009	retrotransposon protein, putative, unclassified, expressed
AC187218.4_FG001	tetratricopeptide repeat domain containing protein, putative, expressed
AC187243.3_FG005	expressed protein
AC187260.3_FG007	CBS domain containing membrane protein, putative, expressed
AC187266.3_FG001	expressed protein
AC187285.5_FG004	sucrose synthase, putative, expressed
AC187392.3_FG006	ABC transporter family protein, putative, expressed
AC187409.4_FG008	catalase isozyme B, putative, expressed
AC187485.3_FG001	expressed protein
AC187551.3_FG002	PPR repeat containing protein, expressed
AC187559.2_FG013	retrotransposon protein, putative, unclassified, expressed
AC187782.4_FG008	coiled-coil domain-containing protein, putative, expressed
AC187782.4_FG009	expressed protein
AC187788.3_FG008	scarecrow, putative, expressed
AC187789.3_FG001	expressed protein
AC187792.3_FG008	OsWAK63 - OsWAK receptor-like protein kinase, expressed
AC187793.3_FG001	RFC2 - Putative clamp loader of PCNA, replication factor C subunit 2, expressed
AC187802.3_FG001	zinc finger DHHC domain-containing protein, putative, expressed
AC187802.3_FG008	expressed protein
AC187809.3_FG005	ulp1 protease family, C-terminal catalytic domain containing protein, expressed
AC187813.3_FG004	PPR repeat containing protein, expressed
AC187820.2_FG001	expressed protein
AC187840.3_FG002	expressed protein
AC187843.3_FG001	RD26, putative, expressed
AC187843.3_FG010	RD26, putative, expressed
AC187870.3_FG002	expressed protein
AC187870.3_FG003	NAD binding domain of 6-phosphogluconate dehydrogenase containing protein, expressed
AC187875.3_FG006	phospholipase D, putative, expressed
AC187875.3_FG009	calcium-transporting ATPase 9, plasma membrane-type, putative, expressed
AC187885.3_FG005	AMP-binding domain containing protein, expressed
AC187891.3_FG006	DUF623 domain containing protein, expressed
AC187896.3_FG006	expressed protein
AC187901.4_FG002	retrotransposon protein, putative, unclassified, expressed
AC187910.5_FG002	25.3 kDa vesicle transport protein, putative, expressed
AC187910.5_FG006	amine oxidase, putative, expressed
AC187917.3_FG001	expressed protein
AC187919.5_FG010	CESA1 - cellulose synthase, expressed
AC187920.3_FG001	uncharacterized UPF0114 domain containing protein, expressed
AC188001.3_FG009	pre-mRNA-splicing factor, putative, expressed
AC188003.3_FG012	LTPL33 - Protease inhibitor/seed storage/LTP family protein precursor, expressed
AC188005.3_FG003	peptide transporter PTR2, putative, expressed
AC188010.3_FG002	kinesin motor domain containing protein, putative, expressed
AC188023.3_FG005	expressed protein
AC188023.3_FG011	CGMC_MAPKCMGC_2_ERK.12 - CGMC includes CDA, MAPK, GSK3, and CLKC kinases, expressed
AC188024.3_FG003	OsWAK13 - OsWAK receptor-like protein kinase, expressed
AC188134.2_FG009	expressed protein
AC188134.2_FG011	expressed protein
AC188144.2_FG006	expressed protein
AC188195.2_FG006	protein binding protein, putative, expressed
AC188197.3_FG001	retrotransposon protein, putative, unclassified, expressed
AC188710.4_FG001	RNA recognition motif containing protein, putative, expressed
AC188710.4_FG006	expressed protein
AC188713.2_FG005	formin-like protein 20, putative, expressed
AC188718.3_FG005	expressed protein
AC188718.3_FG006	expressed protein
AC188718.3_FG011	expressed protein
AC188718.3_FG015	expressed protein
AC188719.3_FG003	CYPRO4, putative, expressed
AC188727.3_FG003	zinc knuckle family protein, expressed
AC188738.4_FG006	transposon protein, putative, Pong sub-class, expressed
AC188746.2_FG001	harpin-induced protein 1 domain containing protein, expressed
AC188752.3_FG006	expressed protein
AC188752.3_FG008	expressed protein
AC188752.3_FG011	expressed protein
AC188753.3_FG003	receptor protein kinase CLAVATA1 precursor, putative, expressed
AC188753.3_FG004	SAP domain containing protein, expressed
AC188753.3_FG005	AMP-binding domain containing protein, expressed
AC188754.3_FG002	dnaJ domain containing protein, expressed
AC188757.4_FG004	transposon protein, putative, Pong sub-class, expressed
AC188759.3_FG010	pentatricopeptide containing protein, putative, expressed
AC188823.3_FG007	reductase, putative, expressed
AC188827.4_FG012	glycosyl transferase 8 domain containing protein, putative, expressed
AC188831.3_FG003	plasma membrane ATPase, putative, expressed
AC188831.3_FG006	expressed protein
AC188832.5_FG005	OsMADS13 - MADS-box family gene with MIKCc type-box, expressed
AC188838.3_FG005	amidophosphoribosyltransferase, chloroplast precursor, putative, expressed
AC188966.3_FG002	bromodomain containing protein, expressed
AC188972.3_FG003	seed specific protein Bn15D14A, putative, expressed
AC188978.3_FG008	retrotransposon protein, putative, unclassified, expressed
AC189039.3_FG013	OsFBL33 - F-box domain and LRR containing protein, expressed
AC189041.2_FG005	FYVE zinc finger family protein, expressed
AC189048.2_FG001	retrotransposon protein, putative, unclassified, expressed
AC189060.4_FG003	cyclic nucleotide-gated ion channel 2, putative, expressed
AC189060.4_FG007	retrotransposon protein, putative, unclassified, expressed
AC189061.3_FG004	STE_MEK_ste7_MAP2K.3 - STE kinases include homologs to sterile 7, sterile 11 and sterile 20 from yeast, expressed
AC189091.2_FG002	transposon protein, putative, CACTA, En/Spm sub-class, expressed
AC189280.3_FG001	protein binding protein, putative, expressed
AC189699.4_FG002	receptor protein kinase CLAVATA1 precursor, putative, expressed
AC189744.3_FG005	retrotransposon protein, putative, LINE subclass, expressed
AC189750.4_FG004	OsAPRL1 adenosine 5\'-phosphosulfate reductase-like OsAPRL1, expressed
AC189753.3_FG002	expressed protein
AC189754.3_FG004	powdery mildew resistant protein 5, putative, expressed
AC189766.3_FG001	adaptin, putative, expressed
AC189774.4_FG003	harpin-induced protein 1 domain containing protein, expressed
AC189785.3_FG009	ATMIN7, putative, expressed
AC189795.3_FG001	transposon protein, putative, Pong sub-class, expressed
AC189796.3_FG004	expressed protein
AC189879.3_FG003	PINHEAD, putative, expressed
AC190225.2_FG001	DUF640 domain containing protein, putative, expressed
AC190480.1_FG007	nodulin, putative, expressed
AC190491.1_FG002	transposon protein, putative, Mariner sub-class, expressed
AC190498.1_FG007	expressed protein
AC190499.1_FG003	OsDegp9 - Putative Deg protease homologue, expressed
AC190507.1_FG007	adenylate kinase, putative, expressed
AC190516.1_FG003	protein binding protein, putative, expressed
AC190518.1_FG002	alpha-1,4-glucan-protein synthase, putative, expressed
AC190526.3_FG004	expressed protein
AC190533.4_FG006	von Willebrand factor type A domain containing protein, expressed
AC190537.2_FG002	metallothionein family protein, expressed
AC190538.2_FG005	receptor-like protein kinase 2 precursor, putative, expressed
AC190550.3_FG005	expressed protein
AC190554.3_FG008	ABC transporter, ATP-binding protein, putative, expressed
AC190560.2_FG002	dihydroneopterin aldolase, putative, expressed
AC190561.3_FG002	external NADH-ubiquinone oxidoreductase 1, mitochondrial precursor, putative, expressed
AC190570.3_FG003	Brix domain containing protein, putative, expressed
AC190572.4_FG001	retrotransposon protein, putative, unclassified, expressed
AC190582.4_FG011	leucine rich repeat containing protein, expressed
AC190586.3_FG001	AMP-binding domain containing protein, expressed
AC190587.3_FG005	expressed protein
AC190588.3_FG003	expressed protein
AC190609.3_FG001	transcription factor RF2a, putative, expressed
AC190609.3_FG002	60S ribosomal protein L38, putative, expressed
AC190609.3_FG003	60S ribosomal protein L7, putative, expressed
AC190609.3_FG004	aspartic proteinase-like protein 2 precursor, putative, expressed
AC190609.3_FG005	expressed protein
AC190613.3_FG001	retrotransposon protein, putative, LINE subclass, expressed
AC190620.3_FG004	E1-E2 ATPase domain containing protein, expressed
AC190623.3_FG001	photosystem II reaction center W protein, chloroplast precursor, putative, expressed
AC190623.3_FG002	expressed protein
AC190628.4_FG007	AAA family ATPase, putative, expressed
AC190630.2_FG001	zinc finger, RING-type, putative, expressed
AC190632.2_FG004	ras-related protein, putative, expressed
AC190636.3_FG005	1-aminocyclopropane-1-carboxylate oxidase 2, putative, expressed
AC190638.3_FG001	AGAP000425-PA, putative, expressed
AC190643.4_FG011	Core histone H2A/H2B/H3/H4 domain containing protein, putative, expressed
AC190652.3_FG001	ATP synthase, putative, expressed
AC190659.4_FG003	oryzain gamma chain precursor, putative, expressed
AC190665.3_FG006	expressed protein
AC190671.4_FG003	expressed protein
AC190682.3_FG014	transposon protein, putative, unclassified, expressed
AC190688.3_FG006	curculin-like lectin family protein, putative, expressed
AC190695.3_FG003	zinc knuckle domain containing protein, expressed
AC190700.3_FG002	eukaryotic aspartyl protease domain containing protein, expressed
AC190701.3_FG001	cytidylyltransferase domain containing protein, expressed
AC190713.3_FG004	haemolysin-III, putative, expressed
AC190716.3_FG001	cyclin-dependent kinase B2-1, putative, expressed
AC190724.3_FG004	zinc knuckle family protein, expressed
AC190734.2_FG003	TCP family transcription factor, putative, expressed
AC190734.2_FG006	lung seven transmembrane domain containing protein, putative, expressed
AC190740.2_FG004	expressed protein
AC190743.3_FG012	polypyrimidine tract-binding protein, putative, expressed
AC190749.3_FG006	mps one binder kinase activator-like 1A, putative, expressed
AC190750.2_FG014	OsFBX108 - F-box domain containing protein, expressed
AC190751.4_FG008	DUF1645 domain containing protein, putative, expressed
AC190752.2_FG007	expressed protein
AC190753.4_FG002	disease resistance protein RPM1, putative, expressed
AC190757.3_FG001	zinc knuckle family protein, expressed
AC190761.3_FG002	ubiquitin carboxyl-terminal hydrolase, family 1, putative, expressed
AC190765.3_FG003	expressed protein
AC190771.2_FG008	OsFBX65 - F-box domain containing protein, expressed
AC190772.4_FG011	Cupin domain containing protein, expressed
AC190786.4_FG001	copper-transporting ATPase PAA1, putative, expressed
AC190788.2_FG005	mutS family domain IV containing protein, expressed
AC190789.3_FG002	TraB family protein, putative, expressed
AC190792.2_FG006	expressed protein
AC190803.2_FG001	IBS1, putative, expressed
AC190807.2_FG001	ribosome inactivating protein, putative, expressed
AC190816.3_FG007	expressed protein
AC190822.2_FG003	glyoxal oxidase-related, putative, expressed
AC190829.3_FG002	START domain containing protein, expressed
AC190832.2_FG005	P-protein, putative, expressed
AC190834.3_FG005	tRNA-splicing endonuclease positive effector-related, putative, expressed
AC190845.2_FG001	FAR1 family protein, expressed
AC190850.3_FG004	Leucine Rich Repeat family protein, expressed
AC190853.3_FG004	pentatricopeptide containing protein, putative, expressed
AC190858.3_FG001	transketolase, putative, expressed
AC190858.3_FG004	expressed protein
AC190859.3_FG006	CESA1 - cellulose synthase, expressed
AC190860.2_FG008	disease resistance protein RPS2, putative, expressed
AC190872.2_FG001	sucrose-phosphate synthase, putative, expressed
AC190885.4_FG006	DUF567 domain containing protein, putative, expressed
AC190907.3_FG003	OsSub55 - Putative Subtilisin homologue, expressed
AC190909.3_FG001	retrotransposon protein, putative, unclassified, expressed
AC190909.3_FG003	1,3-beta-glucan synthase component domain containing protein, expressed
AC190909.3_FG004	1,3-beta-glucan synthase component domain containing protein, expressed
AC190910.2_FG001	AMP-binding domain containing protein, expressed
AC190913.3_FG002	expressed protein
AC190915.3_FG007	expressed protein
AC190932.3_FG008	expressed protein
AC190933.3_FG004	universal stress protein domain containing protein, putative, expressed
AC190936.1_FG004	expressed protein
AC190940.3_FG005	OsLonP3 - Putative Lon protease homologue, expressed
AC190968.2_FG009	endonuclease/Exonuclease/phosphatase family protein, expressed
AC190975.3_FG004	xylose isomerase, putative, expressed
AC190981.2_FG007	DUF740 domain containing protein, expressed
AC190990.2_FG005	retrotransposon protein, putative, unclassified, expressed
AC190992.2_FG009	protein kinase, putative, expressed
AC190996.4_FG001	expressed protein
AC190999.2_FG004	DNA repair metallo-beta-lactamase family protein, expressed
AC191009.3_FG004	snRK1-interacting protein 1, putative, expressed
AC191015.2_FG004	zinc knuckle family protein, expressed
AC191042.4_FG001	cadmium tolerance factor, putative, expressed
AC191046.2_FG002	proton pump interactor, putative, expressed
AC191048.2_FG006	prenylated rab acceptor, putative, expressed
AC191050.3_FG003	cupin domain containing protein, expressed
AC191067.3_FG005	expressed protein
AC191069.3_FG004	expressed protein
AC191070.3_FG002	CK1_CaseinKinase_1.6 - CK1 includes the casein kinase 1 kinases, expressed
AC191070.3_FG006	AGC_PVPK_like_kin82y.20 - ACG kinases include homologs to PKA, PKG and PKC, expressed
AC191071.3_FG001	flavin-containing monooxygenase family protein, putative, expressed
AC191072.3_FG006	retrotransposon protein, putative, unclassified, expressed
AC191073.2_FG001	GRF zinc finger family protein, expressed
AC191091.1_FG005	homeobox domain containing protein, expressed
AC191097.3_FG007	cytochrome b561, putative, expressed
AC191107.4_FG001	zinc knuckle family protein, expressed
AC191107.4_FG002	amine oxidase family protein, putative, expressed
AC191113.2_FG002	expressed protein
AC191115.3_FG002	protein kinase family protein, putative, expressed
AC191246.3_FG002	hydrolase, NUDIX family, domain containing protein, expressed
AC191246.3_FG006	pentatricopeptide, putative, expressed
AC191251.3_FG005	expressed protein
AC191253.3_FG004	MYB family transcription factor, putative, expressed
AC191254.3_FG001	expressed protein
AC191254.3_FG003	transposon protein, putative, unclassified, expressed
AC191255.2_FG003	WD domain, G-beta repeat domain containing protein, expressed
AC191257.3_FG002	expressed protein
AC191257.3_FG006	pumilio-family RNA binding repeat containing protein, expressed
AC191257.3_FG010	retrotransposon protein, putative, LINE subclass, expressed
AC191264.3_FG002	expressed protein
AC191272.3_FG003	transcription factor, putative, expressed
AC191273.3_FG003	B4-BTB3 - Bric-a-Brac, Tramtrack, Broad Complex BTB domain with B4 subfamily conserved sequence, expressed
AC191279.2_FG001	RD26, putative, expressed
AC191279.2_FG003	RD26, putative, expressed
AC191281.3_FG003	oxidoreductase, short chain dehydrogenase/reductase family protein, putative, expressed
AC191283.3_FG004	expressed protein
AC191287.2_FG001	RFC1 - Putative clamp loader of PCNA, replication factor C subunit 1, expressed
AC191304.3_FG012	MATE efflux family protein, putative, expressed
AC191306.3_FG004	copper-transporting ATPase PAA1, putative, expressed
AC191315.2_FG003	PWWP domain containing protein, expressed
AC191325.3_FG005	CAMK_CAMK_like.2 - CAMK includes calcium/calmodulin depedent protein kinases, expressed
AC191325.3_FG006	cytochrome P450, putative, expressed
AC191330.3_FG001	zinc knuckle family protein, expressed
AC191330.3_FG009	pentatricopeptide, putative, expressed
AC191359.3_FG003	expressed protein
AC191366.2_FG006	expressed protein
AC191375.3_FG001	RALFL4 - Rapid ALkalinization Factor RALF family protein precursor, expressed
AC191379.3_FG002	potassium channel protein, putative, expressed
AC191401.3_FG012	DEK C terminal domain containing protein, expressed
AC191401.3_FG013	expressed protein
AC191410.4_FG004	hydrolase, alpha/beta fold family domain containing protein, expressed
AC191412.3_FG002	T-complex protein, putative, expressed
AC191521.3_FG004	expressed protein
AC191523.3_FG001	double-strand break repair protein MRE11, putative, expressed
AC191524.3_FG007	BT1 family protein, putative, expressed
AC191526.3_FG001	zinc knuckle family protein, expressed
AC191532.3_FG002	expressed protein
AC191534.3_FG003	zinc finger, C3HC4 type domain containing protein, expressed
AC191541.4_FG005	peptidase, T1 family, putative, expressed
AC191548.3_FG010	MYST-like histone acetyltransferase 1, putative, expressed
AC191551.3_FG003	chalcone synthase, putative, expressed
AC191562.3_FG003	tyrosine protein kinase domain containing protein, putative, expressed
AC191563.3_FG002	POLD1 - Putative DNA polymerase delta catalytic subunit, expressed
AC191566.3_FG001	carbohydrate binding protein, putative, expressed
AC191567.3_FG001	expressed protein
AC191567.3_FG002	TKL_IRAK_DUF26-la.1 - DUF26 kinases have homology to DUF26 containing loci, expressed
AC191575.2_FG001	haloacid dehalogenase-like hydrolase family protein, putative, expressed
AC191601.1_FG003	expressed protein
AC191622.3_FG003	uncharacterized protein PA4923, putative, expressed
AC191623.3_FG007	GHMP kinases ATP-binding protein, putative, expressed
AC191633.3_FG003	retrotransposon protein, putative, LINE subclass, expressed
AC191650.3_FG003	Zinc finger, C3HC4 type domain containing protein, expressed
AC191658.3_FG002	PPR repeat domain containing protein, putative, expressed
AC191658.3_FG007	HEAT repeat family protein, putative, expressed
AC191676.3_FG011	hsp20/alpha crystallin family protein, putative, expressed
AC191691.3_FG011	flavin monooxygenase, putative, expressed
AC191708.3_FG001	RD26, putative, expressed
AC191708.3_FG002	RD26, putative, expressed
AC191713.3_FG001	src homology-3 domain protein 3, putative, expressed
AC191718.3_FG001	TKL_IRAK_CrRLK1L-1.6 - The CrRLK1L-1 subfamily has homology to the CrRLK1L homolog, expressed
AC191735.3_FG009	expressed protein
AC191748.3_FG001	expressed protein
AC191759.3_FG003	40S ribosomal protein S6, putative, expressed
AC191759.3_FG008	zinc finger, C3HC4 type domain containing protein, expressed
AC191771.3_FG008	expressed protein
AC191775.4_FG004	DNA-directed RNA polymerase 1B, mitochondrial precursor, putative, expressed
AC191781.4_FG004	harpin-induced protein 1 domain containing protein, expressed
AC191790.3_FG005	expressed protein
AC191802.3_FG004	heparanase-like protein precursor, putative, expressed
AC191803.3_FG006	retrotransposon protein, putative, unclassified, expressed
AC191926.3_FG001	cysteine proteinase inhibitor precursor protein, putative, expressed
AC191961.3_FG009	tRNA-splicing endonuclease positive effector-related, putative, expressed
AC192204.3_FG005	chlorophyll A-B binding protein, putative, expressed
AC192210.3_FG005	TKL_IRAK_CR4L.6 - The CR4L subfamily has homology with Crinkly4, expressed
AC192224.3_FG002	expressed protein
AC192226.3_FG007	hAT dimerisation domain-containing protein, putative
AC192236.3_FG007	NB-ARC domain containing protein, expressed
AC192240.3_FG004	STE_MEKK_ste11_MAP3K.18 - STE kinases include homologs to sterile 7, sterile 11 and sterile 20 from yeast, expressed
AC192244.3_FG002	DnaK family protein, putative, expressed
AC192244.3_FG006	AMP-binding domain containing protein, expressed
AC192244.3_FG007	cytidylyltransferase domain containing protein, expressed
AC192250.3_FG006	maltose excess protein 1-like, chloroplast precursor, putative, expressed
AC192251.3_FG001	retrotransposon protein, putative, unclassified, expressed
AC192267.3_FG001	rickettsia 17 kDa surface antigen family protein, expressed
AC192330.1_FG004	zinc knuckle family protein, expressed
AC192356.3_FG003	expressed protein
AC192362.3_FG003	expressed protein
AC192367.2_FG002	formin, putative, expressed
AC192368.3_FG010	GATA zinc finger domain containing protein, expressed
AC192377.3_FG002	NADP-dependent malic enzyme, chloroplast precursor, putative, expressed
AC192405.3_FG001	transposon protein, putative, CACTA, En/Spm sub-class, expressed
AC192451.3_FG001	reticulon domain containing protein, putative, expressed
AC192595.3_FG001	lissencephaly type-1-like homology motif, putative, expressed
AC192606.3_FG003	expressed protein
AC193324.3_FG002	niemann-Pick C1 protein precursor, putative, expressed
AC193355.3_FG005	SEY1, putative, expressed
AC193362.3_FG002	3-ketoacyl-CoA synthase 10, putative, expressed
AC193379.3_FG001	leucine-rich repeat family protein, putative, expressed
AC193382.3_FG002	pre-mRNA-processing factor 6, putative, expressed
AC193388.3_FG003	phototropic-responsive NPH3 family protein, putative, expressed
AC193401.3_FG004	zinc finger, C3HC4 type domain containing protein, expressed
AC193415.3_FG001	pyridoxamine 5\'-phosphate oxidase family protein, putative, expressed
AC193426.3_FG003	zinc knuckle family protein, expressed
AC193430.3_FG005	exo70 exocyst complex subunit, putative, expressed
AC193441.3_FG009	zinc knuckle family protein, expressed
AC193445.3_FG003	C-methyltransferase, putative, expressed
AC193485.3_FG005	thiol protease SEN102 precursor, putative, expressed
AC193492.3_FG003	no apical meristem protein, putative, expressed
AC193498.4_FG004	U-box domain containing protein, expressed
AC193500.3_FG003	flavin-containing monooxygenase family protein, putative, expressed
AC193591.3_FG001	expressed protein
AC193592.3_FG001	zinc finger, C3HC4 type domain containing protein, expressed
AC193595.3_FG001	transmembrane protein, putative, expressed
AC193598.3_FG002	disease resistant protein, identical, putative, expressed
AC193606.2_FG001	expressed protein
AC193606.2_FG005	expressed protein
AC193625.3_FG007	ABC transporter, ATP-binding protein, putative, expressed
AC193625.3_FG010	Ubiquitin family domain containing protein, expressed
AC193630.3_FG003	WRKY73, expressed
AC193630.3_FG004	WRKY73, expressed
AC193632.2_FG002	Protein kinase domain containing protein, expressed
AC193645.3_FG006	expressed protein
AC193745.3_FG004	expressed protein
AC193753.3_FG005	palmitoyltransferase TIP1, putative, expressed
AC193754.3_FG008	MSH-like DNA mismatch repair protein, putative, expressed
AC193767.3_FG003	auxin response factor, putative, expressed
AC193786.3_FG005	helix-loop-helix DNA-binding domain containing protein, expressed
AC193787.3_FG001	retrotransposon protein, putative, unclassified, expressed
AC193957.3_FG009	lectin protein kinase family protein, putative, expressed
AC193972.3_FG002	Mad3/BUB1 homology region 1 domain containing protein, expressed
AC193986.3_FG006	structural constituent of ribosome, putative, expressed
AC194005.3_FG004	expressed protein
AC194017.3_FG001	DnaK family protein, putative, expressed
AC194020.3_FG001	monocopper oxidase, putative, expressed
AC194022.3_FG001	early fruit mRNA, putative, expressed
AC194022.3_FG013	expressed protein
AC194022.3_FG014	early fruit mRNA, putative, expressed
AC194027.3_FG001	peroxidase precursor, putative, expressed
AC194032.3_FG010	pre-mRNA-splicing factor SF2, putative, expressed
AC194039.4_FG009	expressed protein
AC194047.3_FG001	ankyrin repeat family protein, putative, expressed
AC194056.3_FG008	VQ domain containing protein, putative, expressed
AC194069.3_FG003	40S ribosomal protein S4, putative, expressed
AC194074.4_FG003	expressed protein
AC194083.2_FG001	harpin-induced protein 1 domain containing protein, expressed
AC194091.2_FG001	OsNucAP1 - Putative Nucleoporin Autopeptidase homologue, expressed
AC194098.3_FG003	phosphoesterase, putative, expressed
AC194099.3_FG003	immunoglobulin/major histocompatibility complex, putative, expressed
AC194102.3_FG002	kinesin motor domain containing protein, putative, expressed
AC194104.3_FG007	expressed protein
AC194104.3_FG010	expressed protein
AC194107.3_FG007	pre-mRNA-splicing factor ATP-dependent RNA helicase, putative, expressed
AC194109.3_FG002	jmjC domain containing protein, expressed
AC194109.3_FG005	AMP-binding enzyme, putative, expressed
AC194112.3_FG001	ABC-2 type transporter domain containing protein, expressed
AC194133.3_FG004	ribosomal protein L5, putative, expressed
AC194136.3_FG001	heat shock protein DnaJ, putative, expressed
AC194139.3_FG005	TOPBP1B - Similar to DNA replication protein TOPBP1 from, expressed
AC194158.3_FG005	PLA IIIA/PLP7, putative, expressed
AC194163.3_FG001	retrotransposon protein, putative, unclassified, expressed
AC194164.3_FG004	expressed protein
AC194172.3_FG008	CAF1 family ribonuclease containing protein, putative, expressed
AC194180.3_FG004	expressed protein
AC194180.3_FG012	Spc97 / Spc98 family protein, putative, expressed
AC194192.3_FG002	OsSub55 - Putative Subtilisin homologue, expressed
AC194193.3_FG002	TRAF-type zinc finger family protein, expressed
AC194203.3_FG003	LTPL56 - Protease inhibitor/seed storage/LTP family protein precursor, expressed
AC194214.3_FG001	ceramide kinase-related, putative, expressed
AC194220.4_FG009	flavonol synthase/flavanone 3-hydroxylase, putative, expressed
AC194221.3_FG006	PPR repeat domain containing protein, putative, expressed
AC194233.3_FG001	expressed protein
AC194236.3_FG006	BAH domain containing protein, putative, expressed
AC194242.4_FG002	sialyltransferase family domain containing protein, expressed
AC194246.3_FG004	expressed protein
AC194254.3_FG010	OsMADS13 - MADS-box family gene with MIKCc type-box, expressed
AC194256.3_FG010	MATE efflux family protein, putative, expressed
AC194259.3_FG002	NADPH reductase, putative, expressed
AC194264.3_FG006	inositol or phosphatidylinositol phosphatase/ phosphoric monoester hydrolase, putative, expressed
AC194267.4_FG009	PWWP domain containing protein, expressed
AC194273.3_FG006	RD26, putative, expressed
AC194273.3_FG007	RD26, putative, expressed
AC194296.3_FG001	expressed protein
AC194298.3_FG002	jmjC domain containing protein, expressed
AC194338.3_FG008	expressed protein
AC194339.3_FG004	pentatricopeptide, putative, expressed
AC194341.4_FG002	mitochondrial ATP synthase g subunit family protein, putative, expressed
AC194341.4_FG003	Sad1 / UNC-like C-terminal domain containing protein, putative, expressed
AC194341.4_FG004	OsFBD3 - F-box and FBD domain containing protein, expressed
AC194341.4_FG008	40S ribosomal protein S21, putative, expressed
AC194344.3_FG004	dimethyladenosine transferase, putative, expressed
AC194350.3_FG001	actin, putative, expressed
AC194355.3_FG002	mTERF family protein, expressed
AC194357.3_FG003	heat shock protein DnaJ, putative, expressed
AC194362.3_FG003	WRKY50, expressed
AC194376.3_FG002	expressed protein
AC194405.3_FG009	LTPL35 - Protease inhibitor/seed storage/LTP family protein precursor, putative
AC194405.3_FG021	ATP-binding region, ATPase-like domain containing protein, expressed
AC194425.3_FG005	expressed protein
AC194439.3_FG002	pyrophosphate--fructose 6-phosphate 1-phosphotransferase subunit beta, putative, expressed
AC194442.3_FG003	retrotransposon protein, putative, unclassified, expressed
AC194442.3_FG004	auxin efflux carrier component, putative, expressed
AC194447.3_FG002	transposon protein, putative, unclassified, expressed
AC194457.3_FG001	transporter family protein, putative, expressed
AC194460.3_FG005	squalene synthetase, putative, expressed
AC194467.3_FG006	Leucine Rich Repeat family protein, expressed
AC194472.3_FG001	expressed protein
AC194481.3_FG001	AMP-binding domain containing protein, expressed
AC194481.3_FG002	senescence-induced receptor-like serine/threonine-protein kinase precursor, putative, expressed
AC194592.2_FG001	methyltransferase domain containing protein, expressed
AC194610.2_FG001	membrane attack complex component/perforin/complement C9, putative, expressed
AC194618.2_FG008	chaperone protein dnaJ, putative, expressed
AC194628.3_FG002	expressed protein
AC194628.3_FG003	trehalose synthase, putative, expressed
AC194633.3_FG014	GCN5-related N-acetyltransferase, putative, expressed
AC194666.2_FG010	expressed protein
AC194670.2_FG001	peroxisomal multifunctional enzyme type 2, putative, expressed
AC194671.1_FG003	harpin-induced protein 1 domain containing protein, expressed
AC194676.3_FG002	transposon protein, putative, CACTA, En/Spm sub-class, expressed
AC194695.3_FG003	DUF567 domain containing protein, putative, expressed
AC194698.2_FG001	acyl-CoA synthetase protein, putative, expressed
AC194710.3_FG003	HEAT repeat family protein, putative, expressed
AC194723.3_FG004	phytosulfokine receptor precursor, putative, expressed
AC194734.3_FG004	chlorophyll A-B binding protein, putative, expressed
AC194735.3_FG010	nucleolar protein NOP5-1, putative, expressed
AC194824.2_FG003	zinc knuckle domain containing protein, expressed
AC194833.3_FG001	AP2 domain containing protein, expressed
AC194834.3_FG002	DNA mismatch repair protein, putative, expressed
AC194839.3_FG001	expressed protein
AC194839.3_FG004	expressed protein
AC194847.4_FG002	cytochrome P450, putative, expressed
AC194852.3_FG007	pectate lyase precursor, putative, expressed
AC194853.1_FG002	transcription elongation factor 1, putative, expressed
AC194856.3_FG002	rhodanese, putative, expressed
AC194856.3_FG007	rhodanese, putative, expressed
AC194863.3_FG004	zinc knuckle family protein, expressed
AC194863.3_FG006	9-cis-epoxycarotenoid dioxygenase 1, chloroplast precursor, putative, expressed
AC194863.3_FG007	lecithin cholesterol acyltransferase, putative, expressed
AC194865.2_FG004	expressed protein
AC194873.3_FG006	receptor-like protein kinase 2 precursor, putative, expressed
AC194886.3_FG013	AMP-binding domain containing protein, expressed
AC194886.3_FG015	CESA1 - cellulose synthase, expressed
AC194898.3_FG003	expressed protein
AC194905.2_FG003	PPR repeat domain containing protein, putative, expressed
AC194914.3_FG002	cyclase/dehydrase family protein, putative, expressed
AC194915.2_FG005	AMP-binding enzyme, putative, expressed
AC194960.3_FG005	PH domain containing protein, expressed
AC194965.4_FG001	ethylene receptor, putative, expressed
AC194965.4_FG004	GATA zinc finger domain containing protein, expressed
AC194970.5_FG001	polyprenyl synthetase, putative, expressed
AC194970.5_FG002	BES1/BZR1 homolog protein, putative, expressed
AC194970.5_FG004	expressed protein
AC194970.5_FG005	transporter-related, putative, expressed
AC194970.5_FG009	ruvB-like 2, putative, expressed
AC194972.2_FG001	ZOS11-02 - C2H2 zinc finger protein, expressed
AC194974.3_FG005	lectin-like receptor kinase 1, putative, expressed
AC194977.2_FG004	2-oxoglutarate dehydrogenase E1 component, mitochondrial precursor, putative, expressed
AC194980.3_FG005	expressed protein
AC195059.3_FG003	alanyl-tRNA synthetase family protein, expressed
AC195135.3_FG002	expressed protein
AC195138.3_FG004	retrotransposon protein, putative, unclassified, expressed
AC195141.3_FG002	expressed protein
AC195147.3_FG001	BTB/POZ domain containing protein, expressed
AC195147.3_FG008	expressed protein
AC195150.2_FG002	la domain containing protein, expressed
AC195154.3_FG004	myosin head family protein, expressed
AC195161.2_FG002	retrotransposon protein, putative, LINE subclass, expressed
AC195165.2_FG001	phosphoesterase family protein, putative, expressed
AC195167.1_FG009	auxin response factor 18, putative, expressed
AC195172.3_FG001	electron transfer flavoprotein subunit alpha, mitochondrial precursor, putative, expressed
AC195176.3_FG001	AMP-binding domain containing protein, expressed
AC195186.1_FG002	expressed protein
AC195205.2_FG002	retrotransposon protein, putative, unclassified, expressed
AC195207.2_FG002	retrotransposon protein, putative, unclassified, expressed
AC195208.3_FG007	SNARE associated Golgi protein, putative, expressed
AC195211.3_FG001	40S ribosomal protein S4, putative, expressed
AC195215.3_FG003	expressed protein
AC195220.3_FG005	expressed protein
AC195220.3_FG007	TMS membrane protein/tumour differentially expressed protein, putative, expressed
AC195225.3_FG007	ATP synthase, putative, expressed
AC195230.2_FG003	uncharacterized protein HI0077, putative, expressed
AC195235.3_FG003	tRNA-splicing endonuclease positive effector-related, putative, expressed
AC195251.3_FG007	transmembrane anterior posterior transformation 1, putative, expressed
AC195260.2_FG007	expressed protein
AC195262.2_FG009	expressed protein
AC195307.3_FG001	retrotransposon protein, putative, unclassified, expressed
AC195312.3_FG007	heat shock protein 101, putative, expressed
AC195316.3_FG003	PWWP domain containing protein, expressed
AC195319.3_FG001	4-coumarate--CoA ligase-like 7, putative, expressed
AC195320.3_FG003	expressed protein
AC195321.3_FG002	GIL1, putative, expressed
AC195323.3_FG011	FAD-binding and arabino-lactone oxidase domains containing protein, putative, expressed
AC195340.3_FG001	tubulin/FtsZ domain containing protein, putative, expressed
AC195340.3_FG002	4Fe-4S binding domain containing protein, expressed
AC195340.3_FG004	expressed protein
AC195340.3_FG005	expressed protein
AC195343.3_FG002	chaperonin, putative, expressed
AC195347.4_FG004	expressed protein
AC195349.3_FG005	cyclin-dependent kinase B2-1, putative, expressed
AC195366.3_FG008	splicing factor, putative, expressed
AC195370.3_FG003	tetratricopeptide repeat domain containing protein, putative, expressed
AC195389.3_FG001	retrotransposon protein, putative, LINE subclass, expressed
AC195401.3_FG002	Inositol 1, 3, 4-trisphosphate 5/6-kinase, putative, expressed
AC195461.3_FG002	kelch repeat protein, putative, expressed
AC195466.3_FG001	expressed protein
AC195484.3_FG003	expressed protein
AC195485.3_FG002	retrotransposon protein, putative, LINE subclass, expressed
AC195534.3_FG003	zinc knuckle family protein, expressed
AC195536.3_FG006	expressed protein
AC195543.3_FG009	AMP-binding domain containing protein, expressed
AC195550.3_FG003	zinc finger, C3HC4 type domain containing protein, expressed
AC195580.2_FG010	expressed protein
AC195587.4_FG001	OsMADS5 - MADS-box family gene with MIKCc type-box, expressed
AC195587.4_FG003	expressed protein
AC195587.4_FG004	stripe rust resistance protein Yr10, putative, expressed
AC195587.4_FG005	OsMADS5 - MADS-box family gene with MIKCc type-box, expressed
AC195671.2_FG001	flavin monooxygenase, putative, expressed
AC195682.4_FG008	NB-ARC/LRR disease resistance protein, putative, expressed
AC195685.3_FG001	DNA repair protein Rad51, putative, expressed
AC195785.3_FG004	carbohydrate binding protein, putative, expressed
AC195789.3_FG001	uncharacterized TPR repeat-containing protein, putative, expressed
AC195794.3_FG002	Cupin domain containing protein, expressed
AC195825.3_FG001	Rf1, mitochondrial precursor, putative, expressed
AC195826.2_FG004	tetratricopeptide repeat containing protein, putative, expressed
AC195826.2_FG006	ammonium transporter protein, putative, expressed
AC195828.3_FG002	leucine-rich repeat receptor protein kinase EXS precursor, putative, expressed
AC195831.3_FG004	phytosulfokine receptor precursor, putative, expressed
AC195833.3_FG001	Kinesin motor domain domain containing protein, expressed
AC195836.2_FG003	MYB family transcription factor, putative, expressed
AC195836.2_FG004	expressed protein
AC195860.3_FG002	expressed protein
AC195860.3_FG005	CHCH domain containing protein, expressed
AC195860.3_FG006	60S ribosomal protein-related, putative, expressed
AC195864.3_FG001	protein kinase PKN/PRK1, effector, putative, expressed
AC195864.3_FG017	pentatricopeptide, putative, expressed
AC195874.2_FG002	clathrin adaptor complex small chain domain containing protein, expressed
AC195900.2_FG001	HEAT repeat family protein, putative, expressed
AC195902.3_FG005	pentatricopeptide containing protein, putative, expressed
AC195909.4_FG001	ulp1 protease family protein, putative, expressed
AC195920.3_FG001	harpin-induced protein 1 domain containing protein, expressed
AC195950.4_FG006	NADH-ubiquinone oxidoreductase 51 kDa subunit, mitochondrial precursor, putative, expressed
AC195951.2_FG014	NUP155, putative, expressed
AC195953.2_FG003	expressed protein
AC195957.3_FG003	expressed protein
AC195980.2_FG004	expressed protein
AC195988.2_FG001	retrotransposon protein, putative, LINE subclass, expressed
AC195992.3_FG002	AMP-binding domain containing protein, expressed
AC195995.3_FG006	retrotransposon protein, putative, unclassified, expressed
AC196007.2_FG002	expressed protein
AC196008.1_FG004	expressed protein
AC196011.3_FG001	transporter family protein, putative, expressed
AC196012.3_FG002	AMP-binding domain containing protein, expressed
AC196018.3_FG001	nucleolar GTPase, putative, expressed
AC196018.3_FG003	zinc knuckle family protein, expressed
AC196018.3_FG009	casein kinase II subunit alpha-1, putative, expressed
AC196020.3_FG001	expressed protein
AC196025.3_FG004	expressed protein
AC196031.3_FG006	sucrose synthase, putative, expressed
AC196036.2_FG003	lysosomal alpha-mannosidase precursor, putative, expressed
AC196047.2_FG003	serine/threonine-protein phosphatase BSL2, putative, expressed
AC196057.3_FG001	OsFBX160 - F-box domain containing protein, expressed
AC196059.3_FG003	YGGT family protein, putative, expressed
AC196066.3_FG003	CBS domain containing protein, expressed
AC196068.3_FG006	STE_MEKK_ste11_MAP3K.21 - STE kinases include homologs to sterile 7, sterile 11 and sterile 20 from yeast, expressed
AC196072.3_FG001	expressed protein
AC196090.3_FG006	OsSub25 - Putative Subtilisin homologue, expressed
AC196099.3_FG002	copper-transporting ATPase PAA1, putative, expressed
AC196101.2_FG009	retrotransposon protein, putative, LINE subclass, expressed
AC196106.2_FG001	expressed protein
AC196135.3_FG006	transposon protein, putative, Pong sub-class, expressed
AC196144.3_FG002	CCR4-Not complex component, Not1domain containing protein, expressed
AC196145.3_FG002	expressed protein
AC196156.3_FG003	expressed protein
AC196158.3_FG005	HECT-domain domain containing protein, expressed
AC196161.3_FG002	transcription factor like protein, putative, expressed
AC196166.3_FG001	kinesin motor domain containing protein, putative, expressed
AC196166.3_FG003	pollen-specific protein SF21, putative, expressed
AC196183.3_FG002	S-domain receptor-like protein kinase, putative, expressed
AC196185.3_FG001	receptor protein kinase CLAVATA1 precursor, putative, expressed
AC196193.3_FG003	retrotransposon protein, putative, unclassified, expressed
AC196201.3_FG005	ATP-binding cassette sub-family E member 1, putative, expressed
AC196202.3_FG002	expressed protein
AC196206.3_FG007	retrotransposon protein, putative, unclassified, expressed
AC196210.3_FG001	AMP-binding domain containing protein, expressed
AC196263.4_FG002	eukaryotic aspartyl protease domain containing protein, expressed
AC196264.3_FG002	PLA IIIA/PLP7, putative, expressed
AC196266.3_FG008	expressed protein
AC196278.2_FG003	POLD1 - Putative DNA polymerase delta catalytic subunit, expressed
AC196278.2_FG004	POLD1 - Putative DNA polymerase delta catalytic subunit, expressed
AC196278.2_FG005	expressed protein
AC196290.3_FG002	harpin-induced protein 1 domain containing protein, expressed
AC196290.3_FG007	expressed protein
AC196294.3_FG005	OsMADS13 - MADS-box family gene with MIKCc type-box, expressed
AC196298.3_FG008	WD repeat-containing protein, putative, expressed
AC196394.3_FG002	expressed protein
AC196402.3_FG004	expressed protein
AC196408.3_FG001	ABC transporter, ATP-binding protein, putative, expressed
AC196411.3_FG002	expressed protein
AC196411.3_FG007	AGC_PVPK_like_kin82y.17 - ACG kinases include homologs to PKA, PKG and PKC, expressed
AC196412.3_FG001	decarboxylase, putative, expressed
AC196412.3_FG002	OsSub55 - Putative Subtilisin homologue, expressed
AC196413.3_FG006	small multi-drug export protein, putative, expressed
AC196420.4_FG002	ribosomal protein L24, putative, expressed
AC196421.3_FG005	dnaJ domain containing protein, expressed
AC196426.3_FG007	SEY1, putative, expressed
AC196428.3_FG003	STE_MEKK_ste11_MAP3K.21 - STE kinases include homologs to sterile 7, sterile 11 and sterile 20 from yeast, expressed
AC196435.2_FG005	nuclease PA3, putative, expressed
AC196437.3_FG001	40S ribosomal protein S24, putative, expressed
AC196441.3_FG004	sucrose synthase, putative, expressed
AC196465.3_FG002	expressed protein
AC196465.3_FG006	DDT domain containing protein, putative, expressed
AC196475.3_FG003	phosphoribosyl transferase, putative, expressed
AC196475.3_FG004	O-methyltransferase, putative, expressed
AC196475.3_FG005	no apical meristem protein, putative, expressed
AC196489.3_FG002	L11 domain containing ribosomal protein, putative, expressed
AC196502.3_FG003	proline-rich family protein, putative, expressed
AC196502.3_FG006	expressed protein
AC196637.2_FG002	pentatricopeptide, putative, expressed
AC196645.3_FG007	zinc finger, C3HC4 type domain containing protein, expressed
AC196646.3_FG001	dynein light chain type 1 domain containing protein, expressed
AC196686.3_FG001	CESA1 - cellulose synthase, expressed
AC196708.3_FG006	OsSAUR5 - Auxin-responsive SAUR gene family member, expressed
AC196710.3_FG009	expressed protein
AC196711.3_FG003	splicing factor 3 subunit 1, putative, expressed
AC196718.3_FG003	serine/threonine-protein phosphatase 2A regulatory subunit B subunitbeta, putative, expressed
AC196726.2_FG001	expressed protein
AC196777.3_FG006	disease resistance protein RPS2, putative, expressed
AC196779.3_FG003	HAD superfamily phosphatase, putative, expressed
AC196789.3_FG001	OsFBDUF14 - F-box and DUF domain containing protein, expressed
AC196793.2_FG002	metal transporter Nramp6, putative, expressed
AC196799.3_FG008	serine/threonine-protein kinase Cx32, chloroplast precursor, putative, expressed
AC196954.2_FG012	harpin-induced protein 1 domain containing protein, expressed
AC196956.3_FG003	expressed protein
AC196957.3_FG005	expressed protein
AC196961.2_FG003	Core histone H2A/H2B/H3/H4 domain containing protein, putative, expressed
AC196961.2_FG008	protein of unknown function DUF1296 domain containing protein, expressed
AC196972.3_FG009	polypyrimidine tract-binding protein, putative, expressed
AC196974.3_FG008	harpin-induced protein 1 domain containing protein, expressed
AC196978.5_FG007	peptidyl-prolyl cis-trans isomerase, putative, expressed
AC196979.3_FG005	glycosyl hydrolases family 16, putative, expressed
AC197007.3_FG007	heparanase-like protein precursor, putative, expressed
AC197013.3_FG003	insulin-degrading enzyme, putative, expressed
AC197016.3_FG003	BT1 family protein, putative, expressed
AC197021.3_FG004	GRF zinc finger family protein, expressed
AC197028.3_FG005	expressed protein
AC197029.3_FG003	STE_MEKK_ste11_MAP3K.2 - STE kinases include homologs to sterile 7, sterile 11 and sterile 20 from yeast, expressed
AC197034.3_FG013	tetratricopeptide repeat domain containing protein, putative, expressed
AC197035.3_FG002	expressed protein
AC197041.3_FG001	monogalactosyldiacylglycerol synthase, putative, expressed
AC197047.3_FG001	DUF581 domain containing protein, expressed
AC197054.3_FG002	expressed protein
AC197055.3_FG003	zinc knuckle family protein, expressed
AC197056.3_FG005	MYB family transcription factor, putative, expressed
AC197064.3_FG001	ACT domain containing protein, expressed
AC197076.3_FG003	ATP dependent DNA ligase family protein, putative, expressed
AC197078.4_FG002	transposon protein, putative, CACTA, En/Spm sub-class, expressed
AC197082.3_FG004	expressed protein
AC197082.3_FG005	retrotransposon protein, putative, LINE subclass, expressed
AC197082.3_FG008	expressed protein
AC197086.3_FG005	amine oxidase, putative, expressed
AC197090.3_FG003	isoflavone reductase, putative, expressed
AC197095.3_FG004	retrotransposon protein, putative, unclassified, expressed
AC197118.3_FG005	KIN, antigenic determinant of recA protein, putative, expressed
AC197122.3_FG003	CCR4-NOT transcription factor, putative, expressed
AC197124.3_FG004	transcription elongation factor SPT4 homolog 1, putative, expressed
AC197135.3_FG001	SH3 domain containing protein, expressed
AC197140.2_FG003	AP2 domain containing protein, expressed
AC197141.2_FG001	dynamin, putative, expressed
AC197143.3_FG007	SCP-like extracellular protein, expressed
AC197146.3_FG001	CDC45B - Putative DNA replication initiation protein, expressed
AC197146.3_FG002	myb-like DNA-binding domain containing protein, putative, expressed
AC197150.3_FG003	cyclic nucleotide-gated ion channel, putative, expressed
AC197150.3_FG004	UDP-glucoronosyl and UDP-glucosyl transferase domain containing protein, expressed
AC197164.4_FG002	retrotransposon protein, putative, unclassified, expressed
AC197164.4_FG003	Leucine Rich Repeat family protein, expressed
AC197168.3_FG001	aminotransferase, putative, expressed
AC197170.1_FG011	sec20 domain containing protein, expressed
AC197196.3_FG002	amine oxidase, putative, expressed
AC197230.3_FG001	expressed protein
AC197242.3_FG001	transferase family protein, putative, expressed
AC197246.3_FG001	ras-related protein, putative, expressed
AC197246.3_FG003	60S ribosomal protein L32, putative, expressed
AC197266.3_FG007	phytosulfokine receptor precursor, putative, expressed
AC197267.3_FG004	AMP-binding domain containing protein, expressed
AC197333.2_FG001	3-dehydroquinate synthase, putative, expressed
AC197340.3_FG004	expressed protein
AC197342.3_FG003	expressed protein
AC197345.3_FG005	OsSub55 - Putative Subtilisin homologue, expressed
AC197354.3_FG002	two-component response regulator, putative, expressed
AC197358.3_FG006	peptide transporter PTR2, putative, expressed
AC197362.3_FG002	CAMK_KIN1/SNF1/Nim1_like.15 - CAMK includes calcium/calmodulin depedent protein kinases, expressed
AC197364.3_FG007	RD26, putative, expressed
AC197377.3_FG004	chaperonin, putative, expressed
AC197387.3_FG010	pre-mRNA-processing factor 39, putative, expressed
AC197429.3_FG001	GRAS family transcription factor containing protein, expressed
AC197435.3_FG002	signal recognition particle 68 kDa protein, putative, expressed
AC197437.3_FG001	eyes absent homolog 4, putative, expressed
AC197442.3_FG002	expressed protein
AC197446.3_FG009	cysteine proteinase A494 precursor, putative, expressed
AC197477.3_FG002	expressed protein
AC197496.3_FG005	inner membrane protein, putative, expressed
AC197498.3_FG002	ankyrin repeat domain containing protein, expressed
AC197540.4_FG003	AMP-binding domain containing protein, expressed
AC197541.3_FG009	pectinacetylesterase domain containing protein, expressed
AC197544.3_FG001	DEAD-box ATP-dependent RNA helicase, putative, expressed
AC197544.3_FG002	ulp1 protease family, C-terminal catalytic domain containing protein, expressed
AC197545.3_FG002	CCAAT/enhancer-binding protein, putative, expressed
AC197555.3_FG007	pentatricopeptide, putative, expressed
AC197555.3_FG008	DNA-damage-repair/toleration protein DRT102, putative, expressed
AC197562.3_FG003	retrotransposon protein, putative, unclassified, expressed
AC197575.3_FG005	OsCttP1 - Putative C-terminal processing peptidase homologue, expressed
AC197575.3_FG008	14-3-3 protein, putative, expressed
AC197577.2_FG002	sphingolipid delta desaturase, putative, expressed
AC197578.4_FG001	periplasmic beta-glucosidase precursor, putative, expressed
AC197578.4_FG002	BTBN23 - Bric-a-Brac, Tramtrack, Broad Complex BTB domain with non-phototropic hypocotyl 3 NPH3 and coiled-coil domains, expressed
AC197592.2_FG002	zinc finger, C3HC4 type domain containing protein, expressed
AC197602.3_FG001	AMP-binding domain containing protein, expressed
AC197667.3_FG002	zinc finger, C3HC4 type family protein, expressed
AC197672.3_FG002	acetyl-CoA carboxylase, putative, expressed
AC197699.3_FG001	OsMADS5 - MADS-box family gene with MIKCc type-box, expressed
AC197699.3_FG002	carotenoid cleavage dioxygenase, putative, expressed
AC197699.3_FG003	flavonol synthase/flavanone 3-hydroxylase, putative, expressed
AC197699.3_FG004	plasma membrane ATPase, putative, expressed
AC197699.3_FG005	transcription elongation factor 1, putative, expressed
AC197699.3_FG006	CAMK_CAMK_like_Aur_like.1 - CAMK includes calcium/calmodulin depedent protein kinases, expressed
AC197699.3_FG008	transcription elongation factor 1, putative, expressed
AC197699.3_FG009	transcription elongation factor 1, putative, expressed
AC197699.3_FG010	transcription elongation factor 1, putative, expressed
AC197705.4_FG001	thiamine pyrophosphate enzyme, C-terminal TPP binding domain containing protein, expressed
AC197705.4_FG003	phosphatidylethanolamine-binding protein, putative, expressed
AC197705.4_FG004	zinc finger, C3HC4 type domain containing protein, expressed
AC197705.4_FG006	zinc finger, C3HC4 type domain containing protein, expressed
AC197705.4_FG007	outer membrane protein, OMP85 family protein, expressed
AC197705.4_FG008	expressed protein
AC197705.4_FG011	low photochemical bleaching 1 protein, putative, expressed
AC197713.3_FG001	retrotransposon protein, putative, LINE subclass, expressed
AC197714.3_FG005	formin, putative, expressed
AC197717.3_FG002	protein of unknown function DUF1675 domain containing protein, expressed
AC197718.3_FG002	expressed protein
AC197757.3_FG003	copper methylamine oxidase precursor, putative, expressed
AC197758.3_FG004	peroxidase precursor, putative, expressed
AC197763.2_FG001	ARID/BRIGHT DNA-binding domain-containing protein, putative, expressed
AC197764.4_FG003	ZIM domain containing protein, putative, expressed
AC197783.3_FG005	cytochrome c-type biogenesis protein dbsD-like, putative, expressed
AC197847.3_FG001	cytochrome P450, putative, expressed
AC197901.3_FG002	AMP-binding domain containing protein, expressed
AC197901.3_FG003	ZOS9-11 - C2H2 zinc finger protein, expressed
AC197910.3_FG001	helix-loop-helix DNA-binding domain containing protein, expressed
AC197914.2_FG001	ELMO/CED-12 family protein, putative, expressed
AC197924.3_FG004	expressed protein
AC198026.3_FG001	glutathione S-transferase, putative, expressed
AC198028.3_FG001	phosphatidylinositol kinase, putative, expressed
AC198030.3_FG001	cytidylyltransferase domain containing protein, expressed
AC198077.3_FG002	HAD-superfamily hydrolase subfamily IA, variant 3, putative, expressed
AC198081.2_FG005	ZOS7-07 - C2H2 zinc finger protein, expressed
AC198118.4_FG002	cytochrome P450 72A1, putative, expressed
AC198169.4_FG004	DEAD-box ATP-dependent RNA helicase, putative, expressed
AC198174.4_FG004	ubiquitin carboxyl-terminal hydrolase domain containing protein, expressed
AC198179.4_FG001	endonuclease/exonuclease/phosphatase family domain containing protein, expressed
AC198179.4_FG002	endonuclease/exonuclease/phosphatase family domain containing protein, expressed
AC198206.5_FG001	FAD-binding and arabino-lactone oxidase domains containing protein, putative, expressed
AC198206.5_FG002	argonaute, putative, expressed
AC198229.4_FG001	AMP-binding domain containing protein, expressed
AC198229.4_FG002	cinnamoyl CoA reductase, putative, expressed
AC198324.3_FG003	zinc knuckle family protein, expressed
AC198353.5_FG001	OsSCP43 - Putative Serine Carboxypeptidase homologue, expressed
AC198353.5_FG004	NOL1/NOP2/sun family protein, putative, expressed
AC198357.3_FG002	dnaJ domain containing protein, expressed
AC198361.3_FG004	RNA recognition motif containing protein, putative, expressed
AC198366.3_FG004	GRAS family transcription factor containing protein, expressed
AC198371.3_FG011	WD domain, G-beta repeat domain containing protein, expressed
AC198379.3_FG006	expressed protein
AC198380.3_FG001	phospholipase D, putative, expressed
AC198393.3_FG001	protein phosphatase 2C, putative, expressed
AC198394.3_FG004	3-ketoacyl-CoA synthase precursor, putative, expressed
AC198395.3_FG002	polypyrimidine tract-binding protein, putative, expressed
AC198398.3_FG005	TKL_IRAK_DUF26-lc.13 - DUF26 kinases have homology to DUF26 containing loci, expressed
AC198398.3_FG006	receptor-like protein kinase 2 precursor, putative, expressed
AC198403.3_FG001	AP2 domain containing protein, expressed
AC198418.3_FG005	DEAD-box ATP-dependent RNA helicase 3, putative, expressed
AC198475.3_FG010	harpin-induced protein 1 domain containing protein, expressed
AC198481.3_FG004	Phosphatidylinositol kinase and FAT containing domain protein, putative, expressed
AC198485.3_FG016	retrotransposon protein, putative, LINE subclass, expressed
AC198494.3_FG002	zinc finger C-x8-C-x5-C-x3-H type family protein, expressed
AC198501.3_FG004	AMP-binding domain containing protein, expressed
AC198506.3_FG001	ZOS11-10 - C2H2 zinc finger protein, expressed
AC198509.3_FG004	protein of unknown function DUF1279 domain containing protein, expressed
AC198511.3_FG007	RNA polymerase II transcription factor B subunit 4, putative, expressed
AC198515.3_FG011	oligopeptide transporter, putative, expressed
AC198515.3_FG012	AP2 domain containing protein, expressed
AC198518.3_FG002	SAM domain containing protein, putative, expressed
AC198518.3_FG003	expressed protein
AC198518.3_FG005	helix-loop-helix DNA-binding domain containing protein, expressed
AC198591.3_FG002	AMP-binding domain containing protein, expressed
AC198597.4_FG001	expressed protein
AC198650.3_FG003	WD-40 repeat family protein, putative, expressed
AC198651.3_FG009	expressed protein
AC198696.3_FG009	BTBN6 - Bric-a-Brac, Tramtrack, Broad Complex BTB domain with non-phototropic hypocotyl 3 NPH3 and coiled-coil domains, expressed
AC198699.3_FG004	hydroxyacid oxidase 1, putative, expressed
AC198700.2_FG004	peptide transporter PTR2, putative, expressed
AC198705.3_FG001	expressed protein
AC198721.3_FG002	expressed protein
AC198725.4_FG004	DUF623 domain containing protein, expressed
AC198725.4_FG007	adaptin, putative, expressed
AC198725.4_FG009	WRKY11, expressed
AC198731.3_FG004	EMB1270, putative, expressed
AC198743.3_FG008	PPR repeat domain containing protein, putative, expressed
AC198749.3_FG004	uroporphyrinogen decarboxylase, putative, expressed
AC198752.4_FG002	calmodulin-binding transcription activator 2, putative, expressed
AC198752.4_FG004	serine-aspartate repeat-containing protein I precursor, putative, expressed
AC198765.3_FG003	stripe rust resistance protein Yr10, putative, expressed
AC198773.3_FG002	lipase class 3 family protein, putative, expressed
AC198781.3_FG002	expressed protein
AC198787.3_FG001	retrotransposon protein, putative, unclassified, expressed
AC198787.3_FG004	avr9/Cf-9 rapidly elicited protein 194, putative, expressed
AC198871.3_FG002	expressed protein
AC198894.4_FG007	ATP synthase, putative, expressed
AC198901.4_FG004	transposon protein, putative, CACTA, En/Spm sub-class, expressed
AC198902.3_FG002	expressed protein
AC198923.4_FG002	classical arabinogalactan protein 26 precursor, putative, expressed
AC198937.4_FG002	CESA1 - cellulose synthase, expressed
AC198937.4_FG003	chorismate mutase, chloroplast precursor, putative, expressed
AC198937.4_FG005	no apical meristem protein, putative, expressed
AC198940.4_FG008	expressed protein
AC198971.3_FG006	lactate/malate dehydrogenase, putative, expressed
AC198979.4_FG009	AP2 domain containing protein, expressed
AC198981.4_FG001	zinc knuckle family protein, expressed
AC198982.3_FG006	SET domain-containing protein, putative, expressed
AC198993.3_FG002	glycosyl hydrolase, family 31, putative, expressed
AC198993.3_FG004	PPR repeat domain containing protein, putative, expressed
AC198994.3_FG003	DEAD-box ATP-dependent RNA helicase, putative, expressed
AC199001.3_FG005	PINHEAD, putative, expressed
AC199037.2_FG002	expressed protein
AC199039.3_FG003	expressed protein
AC199053.2_FG005	hAT dimerisation domain-containing protein, putative, expressed
AC199064.3_FG005	amino acid permease family protein, putative, expressed
AC199067.2_FG004	DUF584 domain containing protein, putative, expressed
AC199068.2_FG017	expressed protein
AC199086.2_FG006	beta-galactosidase precursor, putative, expressed
AC199175.2_FG003	fringe-related protein, putative, expressed
AC199175.2_FG006	60S ribosomal protein L22-2, putative, expressed
AC199187.3_FG005	AP2 domain containing protein, expressed
AC199187.3_FG006	hydrolase, alpha/beta fold family domain containing protein, expressed
AC199190.3_FG003	expressed protein
AC199198.3_FG005	ANTH domain containing protein, expressed
AC199204.3_FG002	retrotransposon protein, putative, unclassified, expressed
AC199314.3_FG002	pumilio-family RNA binding repeat containing protein, expressed
AC199315.4_FG001	protein transport protein Sec61 subunit beta, putative, expressed
AC199325.3_FG001	retrotransposon protein, putative, Ty3-gypsy subclass, expressed
AC199343.3_FG013	glutaredoxin, putative, expressed
AC199349.2_FG004	homeobox protein knotted-1, putative, expressed
AC199349.2_FG007	hAT dimerisation domain-containing protein, putative, expressed
AC199354.3_FG011	vacuolar-sorting receptor precursor, putative, expressed
AC199362.5_FG002	verticillium wilt disease resistance protein, putative, expressed
AC199363.4_FG003	DNAJ heat shock N-terminal domain-containing protein, putative, expressed
AC199379.4_FG001	retrotransposon protein, putative, unclassified, expressed
AC199409.4_FG002	OsMADS13 - MADS-box family gene with MIKCc type-box, expressed
AC199439.4_FG005	DnaK family protein, putative, expressed
AC199473.4_FG001	EF hand family protein, putative, expressed
AC199484.3_FG001	receptor-like protein kinase 2 precursor, putative, expressed
AC199487.4_FG001	Lg106, putative, expressed
AC199492.3_FG004	retrotransposon protein, putative, unclassified
AC199492.3_FG005	spotted leaf 11, putative, expressed
AC199497.4_FG001	expressed protein
AC199497.4_FG004	myb-like DNA-binding domain containing protein, expressed
AC199506.2_FG005	PHD-finger domain containing protein, expressed
AC199509.3_FG001	transporter, major facilitator family, putative, expressed
AC199517.4_FG001	expressed protein
AC199517.4_FG006	expressed protein
AC199526.5_FG001	RPGR, putative, expressed
AC199526.5_FG002	S-adenosylmethionine synthetase, putative, expressed
AC199526.5_FG003	CRS2-associated factor 2, chloroplast precursor, putative, expressed
AC199541.4_FG001	UDP-glucoronosyl/UDP-glucosyl transferase, putative, expressed
AC199541.4_FG002	UDP-glucoronosyl/UDP-glucosyl transferase, putative, expressed
AC199541.4_FG004	UDP-glucoronosyl/UDP-glucosyl transferase, putative, expressed
AC199541.4_FG007	UDP-glucoronosyl/UDP-glucosyl transferase, putative, expressed
AC199543.4_FG004	expressed protein
AC199554.2_FG003	nucleobase-ascorbate transporter, putative, expressed
AC199559.4_FG001	expressed protein
AC199567.3_FG002	src homology-3 domain protein 3, putative, expressed
AC199571.3_FG003	expressed protein
AC199571.3_FG004	OsPDIL2-1 protein disulfide isomerase PDIL2-1, expressed
AC199572.3_FG001	serine/threonine-protein kinase, putative, expressed
AC199624.4_FG007	zinc finger family protein, putative, expressed
AC199630.4_FG008	bromodomain containing protein, expressed
AC199632.4_FG007	retrotransposon protein, putative, LINE subclass, expressed
AC199701.4_FG001	expressed protein
AC199705.3_FG006	protein kinase, putative, expressed
AC199705.3_FG008	lipase class 3 family protein, putative, expressed
AC199709.3_FG005	BRCA1 C Terminus domain containing protein, expressed
AC199726.4_FG007	expressed protein
AC199728.4_FG006	zinc knuckle family protein, expressed
AC199765.4_FG008	endoglucanase, putative, expressed
AC199771.4_FG001	expressed protein
AC199771.4_FG011	MOSC domain-containing protein, mitochondrial precursor, putative, expressed
AC199782.5_FG001	arsenical pump-driving ATPase, putative, expressed
AC199782.5_FG002	hydroxymethylglutaryl-CoA synthase, putative, expressed
AC199782.5_FG003	TCP family transcription factor, putative, expressed
AC199800.4_FG001	transposon protein, putative, unclassified, expressed
AC199810.3_FG003	protein kinase domain containing protein, expressed
AC199812.4_FG003	PHD-finger domain containing protein, expressed
AC199820.4_FG006	myb-like DNA-binding domain, SHAQKYF class family protein, expressed
AC199821.2_FG002	MBTB14 - Bric-a-Brac, Tramtrack, Broad Complex BTB domain with Meprin and TRAF Homology MATH domain, expressed
AC199821.2_FG003	auxin-independent growth promoter protein, putative, expressed
AC199826.4_FG003	NHL repeat-containing protein, putative, expressed
AC199842.4_FG004	phospholipase D, putative, expressed
AC199843.4_FG007	zinc knuckle domain containing protein, expressed
AC199843.4_FG009	leucine-rich repeat receptor protein kinase EXS precursor, putative, expressed
AC199850.4_FG001	BTBN21 - Bric-a-Brac, Tramtrack, Broad Complex BTB domain with non-phototropic hypocotyl 3 NPH3 and coiled-coil domains, expressed
AC199854.4_FG001	zinc finger protein, putative, expressed
AC199872.4_FG001	protein kinase domain containing protein, expressed
AC199872.4_FG004	protein kinase domain containing protein, expressed
AC199884.4_FG007	tRNA pseudouridine synthase family protein, putative, expressed
AC199908.4_FG002	H-BTB2 - Bric-a-Brac, Tramtrack, Broad Complex BTB domain with H family conserved sequence, expressed
AC199908.4_FG003	glycosyl transferase family 8, putative, expressed
AC199910.4_FG001	aquaporin protein, putative, expressed
AC199911.5_FG001	vacuolar ATP synthase subunit D 1, putative, expressed
AC199917.4_FG003	S-domain receptor-like protein kinase, putative, expressed
AC199918.4_FG003	dnaJ domain containing protein, expressed
AC199958.4_FG007	cytochrome P450 72A1, putative, expressed
AC199961.4_FG001	endonuclease, putative, expressed
AC200038.4_FG011	AP2 domain containing protein, expressed
AC200038.4_FG012	expressed protein
AC200045.3_FG006	expressed protein
AC200056.4_FG004	expressed protein
AC200057.4_FG007	transcription factor RF2a, putative, expressed
AC200065.5_FG009	hypothetical protein
AC200069.4_FG002	expressed protein
AC200099.4_FG003	cytochrome P450, putative, expressed
AC200099.4_FG006	cytochrome P450, putative, expressed
AC200101.4_FG002	DnaK family protein, putative, expressed
AC200108.4_FG003	lung seven transmembrane domain containing protein, putative, expressed
AC200112.4_FG007	zinc finger, C3HC4 type domain containing protein, expressed
AC200112.4_FG008	expressed protein
AC200117.3_FG004	plasma membrane ATPase, putative, expressed
AC200124.3_FG005	DELLA protein SLR1, putative, expressed
AC200138.3_FG003	multidrug resistance protein, putative, expressed
AC200143.3_FG001	OsFBX148 - F-box domain containing protein, expressed
AC200143.3_FG003	expressed protein
AC200144.4_FG012	CGMC_MAPKCMGC_2_ERK.13 - CGMC includes CDA, MAPK, GSK3, and CLKC kinases, expressed
AC200187.4_FG001	retrotransposon protein, putative, Ty1-copia subclass, expressed
AC200203.2_FG007	zinc finger family protein, putative, expressed
AC200210.1_FG006	M16 domain containing zinc peptidase, putative, expressed
AC200211.3_FG002	exostosin family protein, putative, expressed
AC200211.3_FG008	CAMK_KIN1/SNF1/Nim1_like.14 - CAMK includes calcium/calmodulin depedent protein kinases, expressed
AC200213.2_FG003	AMP-binding domain containing protein, expressed
AC200215.3_FG002	flavonol-3-O-glycoside-7-O-glucosyltransferase 1, putative, expressed
AC200222.4_FG007	suppressor of G2 allele of SKP1, putative, expressed
AC200223.4_FG003	uvrB/uvrC motif family protein, expressed
AC200225.5_FG001	expressed protein
AC200234.3_FG002	outer mitochondrial membrane porin, putative, expressed
AC200251.4_FG005	expressed protein
AC200287.4_FG006	expressed protein
AC200298.4_FG001	heavy metal-associated domain containing protein, expressed
AC200321.3_FG004	reticulon domain containing protein, putative, expressed
AC200322.4_FG013	transposon protein, putative, unclassified, expressed
AC200416.5_FG004	AMP-binding domain containing protein, expressed
AC200490.3_FG005	zinc knuckle family protein, expressed
AC200490.3_FG008	DNAJ heat shock N-terminal domain-containing protein, putative, expressed
AC200493.4_FG001	glycosyl hydrolase family 3 protein, putative, expressed
AC200497.4_FG015	retrotransposon protein, putative, unclassified, expressed
AC200498.2_FG016	zinc knuckle family protein, expressed
AC200503.4_FG006	heat shock protein, putative, expressed
AC200559.4_FG003	retrotransposon protein, putative, unclassified, expressed
AC200613.3_FG004	peptidase, trypsin-like serine and cysteine proteases, putative, expressed
AC200663.4_FG004	homeobox and START domains containing protein, putative, expressed
AC200702.3_FG005	expressed protein
AC200745.4_FG007	ATPase, putative, expressed
AC200753.3_FG003	anthranilate phosphoribosyltransferase, putative, expressed
AC200754.4_FG004	expressed protein
AC200852.4_FG007	glycosyl transferase 8 domain containing protein, putative, expressed
AC200852.4_FG010	retrotransposon protein, putative, LINE subclass, expressed
AC200876.4_FG001	cysteine proteinase COT44 precursor, putative, expressed
AC200876.4_FG006	transcription initiation factor IIB, putative, expressed
AC200884.4_FG002	RNA-binding motif protein, putative, expressed
AC200887.4_FG002	retrotransposon protein, putative, unclassified, expressed
AC200904.3_FG003	expressed protein
AC201740.3_FG003	ZOS9-11 - C2H2 zinc finger protein, expressed
AC201743.3_FG004	plasma membrane ATPase, putative, expressed
AC201745.3_FG001	glyoxalase family protein, putative, expressed
AC201746.4_FG001	expressed protein
AC201771.3_FG007	STE_PAK_Ste20_STLK.6 - STE kinases include homologs to sterile 7, sterile 11 and sterile 20 from yeast, expressed
AC201774.3_FG003	AP2 domain containing protein, expressed
AC201798.4_FG002	conserved hypothetical protein
AC201800.4_FG010	hypothetical protein
AC201811.3_FG003	copper-transporting ATPase, putative, expressed
AC201815.4_FG001	pentatricopeptide, putative, expressed
AC201824.3_FG007	hydrolase, putative, expressed
AC201828.3_FG007	RNA recognition motif containing protein, expressed
AC201832.3_FG006	histone-like transcription factor and archaeal histone, putative, expressed
AC201888.3_FG013	BTBZ3 - Bric-a-Brac, Tramtrack, Broad Complex BTB domain with TAZ zinc finger and Calmodulin-binding domains, expressed
AC201894.4_FG007	phosphatidylinositol-4-phosphate 5-Kinase, putative, expressed
AC201911.3_FG010	tRNA pseudouridine synthase family protein, putative, expressed
AC201957.4_FG005	expressed protein
AC201959.4_FG007	SH2 motif, putative, expressed
AC201971.4_FG006	zinc finger protein, putative, expressed
AC201985.4_FG002	BSD domain containing protein, expressed
AC201991.3_FG004	FHA domain containing protein, putative, expressed
AC201995.4_FG001	9-cis-epoxycarotenoid dioxygenase 1, chloroplast precursor, putative, expressed
AC202011.3_FG010	carrier, putative, expressed
AC202015.3_FG004	expressed protein
AC202023.3_FG005	expressed protein
AC202036.3_FG005	retrotransposon protein, putative, unclassified, expressed
AC202040.4_FG002	transposon protein, putative, unclassified, expressed
AC202041.4_FG003	PPR repeat domain containing protein, putative, expressed
AC202069.3_FG002	cytochrome P450, putative, expressed
AC202073.4_FG001	calmodulin binding protein, putative, expressed
AC202073.4_FG010	harpin-induced protein 1 domain containing protein, expressed
AC202076.3_FG009	hypothetical protein
AC202081.1_FG003	harpin-induced protein 1 domain containing protein, expressed
AC202090.4_FG006	AMP-binding domain containing protein, expressed
AC202091.4_FG003	transposon protein, putative, CACTA, En/Spm sub-class, expressed
AC202101.3_FG002	expressed protein
AC202110.3_FG004	Plant PDR ABC transporter associated domain containing protein, expressed
AC202110.3_FG005	zinc knuckle family protein, expressed
AC202120.3_FG003	bifunctional aminoacyl-tRNA synthetase, putative, expressed
AC202122.2_FG001	cytochrome P450 86A1, putative, expressed
AC202129.3_FG001	expressed protein
AC202132.4_FG002	domain of unknown function domain containing protein, expressed
AC202139.3_FG007	GIL1, putative, expressed
AC202139.3_FG008	DEAD-box ATP-dependent RNA helicase, putative, expressed
AC202158.3_FG001	STE_MEKK_ste11_MAP3K.21 - STE kinases include homologs to sterile 7, sterile 11 and sterile 20 from yeast, expressed
AC202158.3_FG002	enoyl-CoA hydratase/isomerase family protein, putative, expressed
AC202172.3_FG004	DEF9 - Defensin and Defensin-like DEFL family, expressed
AC202179.3_FG004	protein kinase domain containing protein, putative, expressed
AC202179.3_FG005	protein kinase domain containing protein, putative, expressed
AC202181.3_FG003	tRNA-splicing endonuclease positive effector-related, putative, expressed
AC202181.3_FG010	RNA recognition motif containing protein, putative, expressed
AC202185.4_FG004	hsp20/alpha crystallin family protein, putative, expressed
AC202187.4_FG003	transposon protein, putative, CACTA, En/Spm sub-class, expressed
AC202384.4_FG009	expressed protein
AC202386.3_FG002	coatomer alpha subunit, putative, expressed
AC202391.4_FG002	zinc knuckle domain containing protein, expressed
AC202396.4_FG010	No apical meristem protein, putative, expressed
AC202398.4_FG003	expressed protein
AC202405.3_FG002	UDP-glucoronosyl and UDP-glucosyl transferase domain containing protein, expressed
AC202426.3_FG001	retrotransposon protein, putative, unclassified, expressed
AC202434.3_FG004	DNA mismatch repair protein MSH3, putative, expressed
AC202435.3_FG001	OsFBO3 - F-box and other domain containing protein, expressed
AC202435.3_FG003	Ser/Thr protein phosphatase family protein, putative, expressed
AC202439.3_FG001	NHL repeat-containing protein, putative, expressed
AC202439.3_FG006	urea active transporter, putative, expressed
AC202445.4_FG008	cytochrome P450 72A1, putative, expressed
AC202537.4_FG008	expressed protein
AC202548.4_FG002	peptidyl-prolyl cis-trans isomerase, putative, expressed
AC202550.4_FG006	GIL1, putative, expressed
AC202561.3_FG009	cytochrome P450, putative, expressed
AC202567.4_FG004	expressed protein
AC202707.3_FG002	ubiquitin carboxyl-terminal hydrolase, family 1, putative, expressed
AC202835.3_FG004	expressed protein
AC202855.3_FG004	membrane associated DUF588 domain containing protein, putative, expressed
AC202858.3_FG001	harpin-induced protein 1 domain containing protein, expressed
AC202864.3_FG002	GATA zinc finger domain containing protein, expressed
AC202867.3_FG008	heavy-metal-associated domain-containing protein, putative, expressed
AC202877.3_FG002	expressed protein
AC202890.4_FG003	glutamate decarboxylase, putative, expressed
AC202895.3_FG002	helicase, putative, expressed
AC202915.3_FG002	phosphoglycerate mutase, putative, expressed
AC202921.3_FG004	expressed protein
AC202929.3_FG003	metal cation transporter, putative, expressed
AC202936.3_FG003	transporter, major facilitator family, putative, expressed
AC202950.3_FG008	expressed protein
AC202974.3_FG004	harpin-induced protein 1 domain containing protein, expressed
AC202991.3_FG004	DNA-binding bromodomain-containing protein, putative, expressed
AC202998.3_FG006	cyclin-related protein, putative, expressed
AC203004.3_FG004	RNA recognition motif containing protein, putative, expressed
AC203019.3_FG001	galactosyltransferase family protein, putative, expressed
AC203031.3_FG002	expressed protein
AC203041.3_FG005	peroxidase precursor, putative, expressed
AC203048.3_FG001	expressed protein
AC203049.3_FG002	CESA1 - cellulose synthase, expressed
AC203051.3_FG003	3-ketoacyl-CoA synthase precursor, putative, expressed
AC203054.4_FG001	multidrug resistance protein, putative, expressed
AC203070.3_FG005	dihydroorotate dihydrogenase protein, putative, expressed
AC203090.3_FG005	expressed protein
AC203159.3_FG010	plastocyanin-like domain containing protein, putative, expressed
AC203173.3_FG001	IQ calmodulin-binding motif family protein, expressed
AC203173.3_FG002	receptor-like protein kinase 5 precursor, putative, expressed
AC203173.3_FG003	dehydrogenase, putative, expressed
AC203173.3_FG004	elongation factor, putative, expressed
AC203209.3_FG004	transporter family protein, putative, expressed
AC203218.3_FG001	oxidoreductase/ transition metal ion binding protein, putative, expressed
AC203227.3_FG001	DUF617 domain containing protein, expressed
AC203240.3_FG008	expressed protein
AC203253.4_FG001	dual specificity protein phosphatase, putative, expressed
AC203257.2_FG003	zinc finger, C3HC4 type domain containing protein, expressed
AC203262.3_FG002	DUF538 domain containing protein, putative, expressed
AC203265.3_FG002	expressed protein
AC203278.4_FG004	AP2 domain containing protein, expressed
AC203280.3_FG001	RNA recognition motif containing protein, putative, expressed
AC203294.3_FG001	CAMK_CAMK_like.4 - CAMK includes calcium/calmodulin depedent protein kinases, expressed
AC203294.3_FG012	VQ domain containing protein, putative, expressed
AC203306.3_FG003	syntaxin, putative, expressed
AC203307.4_FG001	ubiquitin E3 ligase ICP0, putative, expressed
AC203324.3_FG010	ZOS3-18 - C2H2 zinc finger protein, expressed
AC203334.2_FG001	integral membrane protein DUF6 domain containing protein, expressed
AC203352.3_FG001	glutamate--cysteine ligase, chloroplast precursor, putative, expressed
AC203362.4_FG012	pectinesterase, putative, expressed
AC203366.4_FG001	expressed protein
AC203374.3_FG006	lissencephaly type-1-like homology motif, putative, expressed
AC203381.3_FG006	expressed protein
AC203392.3_FG004	prolipoprotein diacylglyceryl transferase, putative, expressed
AC203408.4_FG003	endoglucanase, putative, expressed
AC203419.4_FG002	ATCHX, putative, expressed
AC203422.3_FG005	AMP-binding domain containing protein, expressed
AC203423.3_FG009	expressed protein
AC203424.3_FG001	expressed protein
AC203430.3_FG007	expressed protein
AC203535.4_FG001	MYB family transcription factor, putative, expressed
AC203535.4_FG002	No apical meristem protein, putative, expressed
AC203535.4_FG003	AMP-binding domain containing protein, expressed
AC203535.4_FG004	rieske domain containing protein, expressed
AC203535.4_FG006	expressed protein
AC203535.4_FG007	protein kinase domain containing protein, expressed
AC203535.4_FG008	protein kinase domain containing protein, expressed
AC203535.4_FG009	RNA polymerase sigma factor, putative, expressed
AC203570.4_FG005	PWWP domain containing protein, expressed
AC203571.3_FG001	transposon protein, putative, unclassified, expressed
AC203581.4_FG001	Cupin domain containing protein, expressed
AC203747.4_FG006	expressed protein
AC203748.3_FG002	expressed protein
AC203752.5_FG002	tRNA synthetase class I, putative, expressed
AC203753.4_FG003	maf, putative, expressed
AC203753.4_FG006	glycosyl hydrolase, family 31, putative, expressed
AC203753.4_FG007	glycosyl hydrolase, family 31, putative, expressed
AC203754.4_FG007	expressed protein
AC203754.4_FG008	amino acid kinase, putative, expressed
AC203761.3_FG002	DNA topoisomerase I family protein, expressed
AC203768.3_FG005	peptidase, putative, expressed
AC203810.4_FG001	phenylalanine ammonia-lyase, putative, expressed
AC203810.4_FG002	expressed protein
AC203832.3_FG002	white-brown complex homolog protein, putative, expressed
AC203834.4_FG006	retrotransposon protein, putative, unclassified, expressed
AC203841.3_FG002	pentatricopeptide, putative, expressed
AC203841.3_FG009	per1-like family protein, putative, expressed
AC203850.3_FG002	NHL repeat-containing protein, putative, expressed
AC203862.4_FG001	vacuolar-processing enzyme precursor, putative, expressed
AC203862.4_FG002	expressed protein
AC203865.3_FG001	tesmin/TSO1-like CXC domain containing protein, expressed
AC203891.3_FG003	OsSub55 - Putative Subtilisin homologue, expressed
AC203897.4_FG001	cytochrome P450, putative, expressed
AC203900.3_FG006	leucine rich repeat family protein, putative, expressed
AC203909.3_FG003	berberine and berberine like domain containing protein, expressed
AC203909.3_FG007	berberine and berberine like domain containing protein, expressed
AC203909.3_FG010	CXXC1 - Cysteine-rich protein with CXXC and CXXXC motifs precursor, putative, expressed
AC203910.3_FG007	expressed protein
AC203920.3_FG004	lissencephaly type-1-like homology motif, putative, expressed
AC203925.3_FG002	expressed protein
AC203947.3_FG001	serine/threonine-protein kinase Cx32, chloroplast precursor, putative, expressed
AC203955.3_FG005	DUF1517 domain containing protein, putative, expressed
AC203956.3_FG004	peptidyl-prolyl cis-trans isomerase, FKBP-type, putative, expressed
AC203957.3_FG004	expressed protein
AC203966.5_FG001	Myosin head domain containing protein, expressed
AC203966.5_FG002	expressed protein
AC203966.5_FG003	receptor protein kinase, putative, expressed
AC203966.5_FG005	gibberellin 20 oxidase 1, putative, expressed
AC203966.5_FG006	25.3 kDa vesicle transport protein, putative, expressed
AC203967.4_FG004	mitochondrial-processing peptidase subunit, mitochondrial precursor, putative, expressed
AC203971.3_FG005	cadmium tolerance factor, putative, expressed
AC203972.3_FG001	disease resistance protein RPM1, putative, expressed
AC203972.3_FG002	lectin-like protein kinase, putative, expressed
AC203985.4_FG001	transporter, major facilitator family, putative, expressed
AC203985.4_FG005	prefoldin subunit, putative, expressed
AC203989.4_FG001	2-aminoethanethiol dioxygenase, putative, expressed
AC204000.2_FG001	CESA1 - cellulose synthase, expressed
AC204007.3_FG001	abhydrolase domain-containing protein FAM108C1, putative, expressed
AC204007.3_FG008	expressed protein
AC204020.3_FG001	transposon protein, putative, unclassified, expressed
AC204045.3_FG001	DNAJ heat shock N-terminal domain-containing protein, putative, expressed
AC204045.3_FG005	translocon Tic40, putative, expressed
AC204046.3_FG003	centromere protein, putative, expressed
AC204050.4_FG006	STE_MEKK_ste11_MAP3K.18 - STE kinases include homologs to sterile 7, sterile 11 and sterile 20 from yeast, expressed
AC204053.2_FG001	retrotransposon protein, putative, unclassified, expressed
AC204061.3_FG001	POLD3 - Putative DNA polymerase delta complex subunit, expressed
AC204061.3_FG004	OsSub55 - Putative Subtilisin homologue, expressed
AC204070.3_FG004	myosin, putative, expressed
AC204212.4_FG001	MYB family transcription factor, putative, expressed
AC204213.1_FG007	transposon protein, putative, unclassified, expressed
AC204231.3_FG010	retrotransposon protein, putative, LINE subclass, expressed
AC204271.3_FG003	stress responsive protein, putative, expressed
AC204277.3_FG006	methyltransferase, putative, expressed
AC204286.3_FG001	SFC, putative, expressed
AC204292.4_FG002	pentatricopeptide, putative, expressed
AC204292.4_FG003	C2 domain containing protein, putative, expressed
AC204292.4_FG005	expressed protein
AC204292.4_FG006	OsSub46 - Putative Subtilisin homologue, expressed
AC204298.3_FG006	expressed protein
AC204300.3_FG003	expressed protein
AC204301.3_FG002	expressed protein
AC204306.3_FG007	RING-H2 finger protein, putative, expressed
AC204352.3_FG012	expressed protein
AC204359.3_FG005	domain of unknown function, DUF250 domain containing protein, expressed
AC204373.3_FG012	armadillo/beta-catenin repeat family protein, putative, expressed
AC204381.3_FG001	expressed protein
AC204382.3_FG010	OsMADS31 - MADS-box family gene with MIKCc type-box, expressed
AC204384.3_FG003	hydrolase protein, putative, expressed
AC204407.3_FG004	resistance protein, putative, expressed
AC204420.3_FG001	expressed protein
AC204432.3_FG003	expressed protein
AC204437.3_FG004	expressed protein
AC204472.3_FG002	oxidoreductase, 2OG-Fe oxygenase family protein, putative, expressed
AC204476.3_FG004	expressed protein
AC204502.4_FG006	DUF623 domain containing protein, expressed
AC204512.3_FG002	ethylene-responsive transcription factor, putative, expressed
AC204515.4_FG006	expressed protein
AC204530.4_FG002	expressed protein
AC204530.4_FG003	annexin, putative, expressed
AC204530.4_FG006	phosphatidylinositol-4-phosphate 5-kinase, putative, expressed
AC204536.3_FG006	expressed protein
AC204539.4_FG001	expressed protein
AC204539.4_FG002	expressed protein
AC204539.4_FG003	profilin domain containing protein, expressed
AC204563.3_FG011	expressed protein
AC204573.3_FG003	OsSub55 - Putative Subtilisin homologue, expressed
AC204573.3_FG015	expressed protein
AC204577.4_FG004	BRE, putative, expressed
AC204581.3_FG003	expressed protein
AC204591.3_FG002	GASR3 - Gibberellin-regulated GASA/GAST/Snakin family protein precursor, expressed
AC204597.3_FG006	phosphoglycerate mutase, putative, expressed
AC204611.4_FG001	expressed protein
AC204616.3_FG007	AMP-binding domain containing protein, expressed
AC204619.3_FG003	expressed protein
AC204621.4_FG006	nodulation-signaling pathway 1 protein, putative, expressed
AC204625.4_FG001	3-ketoacyl-CoA synthase, putative, expressed
AC204641.5_FG001	OsFBK15 - F-box domain and kelch repeat containing protein, expressed
AC204641.5_FG002	retrotransposon protein, putative, unclassified, expressed
AC204641.5_FG003	ulp1 protease family, C-terminal catalytic domain containing protein, expressed
AC204659.3_FG005	pre-mRNA-splicing factor, putative, expressed
AC204690.4_FG005	dihydroorotate dihydrogenase protein, putative, expressed
AC204703.3_FG007	retrotransposon protein, putative, unclassified, expressed
AC204706.2_FG001	FHA domain containing protein, putative, expressed
AC204710.4_FG003	expressed protein
AC204710.4_FG005	zinc knuckle family protein, expressed
AC204711.3_FG002	glycosyl hydrolase family 10 protein, putative, expressed
AC204711.3_FG003	rhodanese-like domain containing protein, putative, expressed
AC204712.3_FG002	expressed protein
AC204717.3_FG005	retrotransposon protein, putative, unclassified, expressed
AC204721.3_FG003	lipase, putative, expressed
AC204763.2_FG001	TOO MANY MOUTHS precursor, putative, expressed
AC204768.3_FG001	expressed protein
AC204774.3_FG003	early-responsive to dehydration protein-related, putative, expressed
AC204821.3_FG004	indole-3-acetate beta-glucosyltransferase, putative, expressed
AC204823.3_FG015	nuclear-pore anchor, putative, expressed
AC204827.3_FG003	expressed protein
AC204839.2_FG015	CCT/B-box zinc finger protein, putative, expressed
AC204846.2_FG006	DUF1230 domain containing protein, expressed
AC204868.3_FG004	OsFBK24 - F-box domain and kelch repeat containing protein, expressed
AC204891.4_FG001	expressed protein
AC204893.3_FG001	uncharacterized GPI-anchored protein At5g19240 precursor, putative, expressed
AC204931.3_FG004	VIP1 protein, putative, expressed
AC204940.3_FG007	expressed protein
AC204940.3_FG008	ANTH domain containing protein, expressed
AC204951.3_FG002	transferase family protein, putative, expressed
AC204992.3_FG004	polygalacturonase, putative, expressed
AC205006.3_FG001	aldehyde oxidase, putative, expressed
AC205006.3_FG010	helicase conserved C-terminal domain containing protein, expressed
AC205008.4_FG001	metal cation transporter, putative, expressed
AC205008.4_FG002	cadmium/zinc-transporting ATPase, putative, expressed
AC205012.3_FG002	phosphatidylinositol 3- and 4-kinase family protein, putative, expressed
AC205017.3_FG010	endoglucanase, putative, expressed
AC205035.3_FG004	expressed protein
AC205039.4_FG002	lung seven transmembrane domain containing protein, putative, expressed
AC205057.3_FG002	expressed protein
AC205057.3_FG004	retrotransposon protein, putative, unclassified, expressed
AC205100.3_FG001	pyrophosphate--fructose 6-phosphate 1-phosphotransferase subunit alpha, putative, expressed
AC205113.3_FG001	E2F family transcription factor protein, putative, expressed
AC205122.4_FG003	expressed protein
AC205122.4_FG005	OsFBX1 - F-box domain containing protein, expressed
AC205122.4_FG006	expressed protein
AC205122.4_FG007	NB-ARC domain containing disease resistance protein, putative, expressed
AC205122.4_FG008	OsFBX1 - F-box domain containing protein, expressed
AC205122.4_FG009	OsFBX15 - F-box domain containing protein, expressed
AC205122.4_FG010	expressed protein
AC205130.3_FG001	expressed protein
AC205143.3_FG001	sucrose-phosphate synthase, putative, expressed
AC205154.3_FG005	peroxidase precursor, putative, expressed
AC205175.3_FG001	expressed protein
AC205181.3_FG005	retrotransposon protein, putative, LINE subclass, expressed
AC205246.2_FG005	expressed protein
AC205250.3_FG004	ZOS1-14 - C2H2 zinc finger protein, expressed
AC205250.3_FG006	disease resistance-responsive family protein, putative, expressed
AC205251.3_FG002	zinc finger, C3HC4 type domain containing protein, expressed
AC205259.3_FG001	plant-specific domain TIGR01568 family protein, expressed
AC205268.3_FG002	AMP-binding domain containing protein, expressed
AC205274.3_FG001	SCP-like extracellular protein, expressed
AC205280.2_FG004	HEAT repeat family protein, putative, expressed
AC205320.3_FG004	expressed protein
AC205324.3_FG003	expressed protein
AC205326.3_FG002	MYB family transcription factor, putative, expressed
AC205341.3_FG007	zinc knuckle family protein, expressed
AC205345.3_FG002	ACBP4, putative, expressed
AC205362.4_FG002	amino acid transporter, putative, expressed
AC205365.3_FG001	hAT dimerisation domain-containing protein, putative, expressed
AC205376.4_FG003	expressed protein
AC205376.4_FG006	tetratricopeptide repeat domain containing protein, expressed
AC205376.4_FG007	pentatricopeptide, putative, expressed
AC205376.4_FG008	transposon protein, putative, Pong sub-class, expressed
AC205379.3_FG004	expressed protein
AC205410.3_FG001	powdery mildew resistant protein 5, putative, expressed
AC205413.4_FG001	peroxidase precursor, putative, expressed
AC205413.4_FG002	peroxidase precursor, putative, expressed
AC205413.4_FG003	peroxidase precursor, putative, expressed
AC205419.3_FG001	plant protein of unknown function DUF869 domain containing protein, expressed
AC205470.3_FG008	expressed protein
AC205471.4_FG003	HSF-type DNA-binding domain containing protein, expressed
AC205471.4_FG004	alpha-DOX2, putative, expressed
AC205471.4_FG007	DUF584 domain containing protein, putative, expressed
AC205471.4_FG008	TOO MANY MOUTHS precursor, putative, expressed
AC205475.2_FG003	UDP-glucoronosyl and UDP-glucosyl transferase domain containing protein, expressed
AC205477.4_FG008	kelch repeat protein, putative, expressed
AC205484.3_FG004	heavy metal-associated domain containing protein, expressed
AC205484.3_FG005	ATP binding protein, putative, expressed
AC205485.3_FG011	expressed protein
AC205500.3_FG002	PPR repeat containing protein, expressed
AC205502.4_FG001	WD domain and HEAT domain containing protein, putative, expressed
AC205502.4_FG004	terpene synthase, putative, expressed
AC205511.3_FG002	expressed protein
AC205521.3_FG003	expressed protein
AC205530.4_FG003	transposon protein, putative, Pong sub-class, expressed
AC205530.4_FG004	AMP-binding domain containing protein, expressed
AC205536.3_FG005	expressed protein
AC205536.3_FG007	expressed protein
AC205542.3_FG004	GDSL-like lipase/acylhydrolase, putative, expressed
AC205552.3_FG003	AAA family ATPase, putative, expressed
AC205562.3_FG002	WRKY69, expressed
AC205574.3_FG006	TCP family transcription factor, putative, expressed
AC205590.3_FG002	GLUCAN SYNTHASE-LIKE protein, putative, expressed
AC205595.3_FG007	cysteine-rich receptor-like protein kinase 8 precursor, putative, expressed
AC205608.4_FG004	peptide transporter PTR2, putative, expressed
AC205615.4_FG002	acyl-protein thioesterase, putative, expressed
AC205616.4_FG002	expressed protein
AC205661.3_FG002	parafibromin, putative, expressed
AC205670.3_FG001	exostosin family domain containing protein, expressed
AC205677.3_FG001	adaptin, putative, expressed
AC205684.3_FG004	transporter, monovalent cation:proton antiporter-2 family, putative, expressed
AC205700.3_FG004	cytochrome P450, putative, expressed
AC205703.4_FG001	ubiquitin family protein, putative, expressed
AC205703.4_FG002	actin, putative, expressed
AC205703.4_FG004	WD domain, G-beta repeat domain containing protein, expressed
AC205703.4_FG005	steroid nuclear receptor, ligand-binding, putative, expressed
AC205703.4_FG006	oxidoreductase, short chain dehydrogenase/reductase family, putative, expressed
AC205703.4_FG010	expressed protein
AC205708.3_FG001	spotted leaf 11, putative, expressed
AC205709.3_FG001	AP2 domain containing protein, expressed
AC205709.3_FG003	OsNucAP3 - Putative Nucleoporin Autopeptidase homologue, expressed
AC205713.4_FG004	RIPER4 - Ripening-related family protein precursor, putative, expressed
AC205722.3_FG004	naringenin,2-oxoglutarate 3-dioxygenase, putative, expressed
AC205725.3_FG010	nucleolar complex protein 2, putative, expressed
AC205725.3_FG011	strictosidine synthase, putative, expressed
AC205726.4_FG005	9-cis-epoxycarotenoid dioxygenase 1, chloroplast precursor, putative, expressed
AC205728.3_FG001	expressed protein
AC205730.3_FG001	expressed protein
AC205730.3_FG002	protein kinase domain containing protein, expressed
AC205735.3_FG006	uncharacterized PPR-repeat protein, putative, expressed
AC205813.4_FG005	Leucine Rich Repeat family protein, expressed
AC205834.3_FG003	metallothionein family protein, expressed
AC205838.3_FG005	expressed protein
AC205853.3_FG014	expressed protein
AC205885.3_FG001	prolipoprotein diacylglyceryl transferase, putative, expressed
AC205886.3_FG001	40S ribosomal protein S4, putative, expressed
AC205888.4_FG004	expressed protein
AC205901.2_FG001	TRAF-type zinc finger family protein, expressed
AC205909.3_FG001	disease resistance protein RPM1, putative, expressed
AC205976.3_FG004	zinc finger, C3HC4 type domain containing protein, expressed
AC205978.3_FG002	TKL_IRAK_DUF26-lh.9 - DUF26 kinases have homology to DUF26 containing loci, expressed
AC205980.2_FG007	galactosyltransferase family protein, putative, expressed
AC205984.3_FG007	OsFBX391 - F-box domain containing protein, expressed
AC205990.3_FG003	NB-ARC domain containing protein, expressed
AC206030.4_FG001	MATE efflux family protein, putative, expressed
AC206156.3_FG009	hypothetical protein
AC206160.3_FG001	ZIM domain containing protein, putative, expressed
AC206165.3_FG007	HSF-type DNA-binding domain containing protein, expressed
AC206165.3_FG009	expressed protein
AC206168.2_FG003	expressed protein
AC206175.3_FG003	AMP-binding enzyme, putative, expressed
AC206184.4_FG002	peripheral-type benzodiazepine receptor, putative, expressed
AC206185.3_FG002	UDP-glucuronate 4-epimerase, putative, expressed
AC206191.3_FG001	SHI, putative, expressed
AC206201.3_FG003	expressed protein
AC206201.3_FG004	anthranilate synthase component I-1, chloroplast precursor, putative, expressed
AC206201.3_FG009	glutaredoxin, putative, expressed
AC206217.2_FG006	ZOS5-10 - C2H2 zinc finger protein, expressed
AC206223.3_FG001	chloroplast unusual positioning protein, putative, expressed
AC206223.3_FG004	WD domain, G-beta repeat domain containing protein, expressed
AC206223.3_FG006	protein kinase, putative, expressed
AC206223.3_FG007	transcription factor like protein, putative, expressed
AC206223.3_FG008	BTBT1 - Bric-a-Brac, Tramtrack, Broad Complex BTB domain with tetratricopeptide repeats, expressed
AC206223.3_FG010	CHCH domain containing protein, expressed
AC206246.3_FG003	homeobox protein rough sheath 1, putative, expressed
AC206259.3_FG002	expressed protein
AC206259.3_FG003	expressed protein
AC206259.3_FG004	expressed protein
AC206262.3_FG006	pollen allergen, putative, expressed
AC206266.3_FG001	ABC transporter, ATP-binding protein, putative, expressed
AC206266.3_FG005	expressed protein
AC206274.3_FG007	SWIRM domain containing protein, expressed
AC206283.3_FG003	expressed protein
AC206294.2_FG001	MRH1, putative, expressed
AC206319.2_FG004	expressed protein
AC206321.3_FG002	60S ribosomal protein L6, putative, expressed
AC206322.3_FG001	KIP1, putative, expressed
AC206326.3_FG004	expressed protein
AC206327.3_FG002	expressed protein
AC206332.3_FG005	galactosyltransferase family protein, putative, expressed
AC206334.3_FG001	vacuolar-sorting receptor precursor, putative, expressed
AC206349.2_FG002	monogalactosyldiacylglycerol synthase, putative, expressed
AC206349.2_FG005	expressed protein
AC206350.3_FG005	dirigent, putative, expressed
AC206392.3_FG004	expressed protein
AC206393.3_FG006	transmembrane amino acid transporter protein, putative, expressed
AC206425.3_FG002	jasmonate-induced protein, putative, expressed
AC206425.3_FG004	CAMK_KIN1/SNF1/Nim1_like.3 - CAMK includes calcium/calmodulin depedent protein kinases, expressed
AC206432.3_FG005	expressed protein
AC206496.3_FG003	enolase, putative, expressed
AC206509.3_FG009	expressed protein
AC206557.3_FG014	PMR5, putative, expressed
AC206579.3_FG003	AMP-binding domain containing protein, expressed
AC206594.2_FG003	retrotransposon protein, putative, unclassified, expressed
AC206610.4_FG004	expressed protein
AC206627.3_FG001	Kinesin motor domain domain containing protein, expressed
AC206634.3_FG004	ras-related protein, putative, expressed
AC206637.3_FG001	hemerythrin family protein, expressed
AC206638.3_FG007	VQ domain containing protein, putative, expressed
AC206638.3_FG015	expressed protein
AC206642.4_FG001	ribosomal protein L29, putative, expressed
AC206648.3_FG003	OsMADS13 - MADS-box family gene with MIKCc type-box, expressed
AC206655.3_FG004	OsMADS87 - MADS-box family gene with M-gamma type-box, expressed
AC206660.4_FG008	histidine kinase, putative, expressed
AC206666.2_FG004	zinc finger family protein, putative, expressed
AC206680.3_FG001	Leucine Rich Repeat family protein, expressed
AC206680.3_FG006	HEAT repeat family protein, putative, expressed
AC206695.3_FG004	RCLEA7 - Root cap and Late embryogenesis related family protein precursor, expressed
AC206698.2_FG002	zinc knuckle family protein, expressed
AC206749.3_FG003	expressed protein
AC206763.3_FG002	expressed protein
AC206764.4_FG001	pentatricopeptide containing protein, putative, expressed
AC206764.4_FG003	expressed protein
AC206764.4_FG004	9-cis-epoxycarotenoid dioxygenase 1, chloroplast precursor, putative, expressed
AC206765.3_FG003	mitochondrial carrier protein, putative, expressed
AC206768.3_FG005	zinc finger, C3HC4 type domain containing protein, expressed
AC206780.3_FG004	expressed protein
AC206786.3_FG002	dynamin family protein, putative, expressed
AC206788.3_FG015	anthocyanidin 5,3-O-glucosyltransferase, putative, expressed
AC206790.3_FG001	NAD dependent epimerase/dehydratase family protein, putative, expressed
AC206824.2_FG002	expressed protein
AC206825.3_FG007	RD26, putative, expressed
AC206831.3_FG015	leucine-rich repeat resistance protein, putative, expressed
AC206839.3_FG003	metallothionein family protein, expressed
AC206840.3_FG002	expressed protein
AC206845.3_FG004	monocopper oxidase, putative, expressed
AC206856.3_FG003	ankyrin repeat domain containing protein, expressed
AC206861.3_FG002	collagen alpha-2, putative, expressed
AC206862.3_FG009	TKL_IRAK_CR4L.6 - The CR4L subfamily has homology with Crinkly4, expressed
AC206868.3_FG004	AP2/EREBP transcription factor BABY BOOM, putative, expressed
AC206898.3_FG007	zinc knuckle family protein, expressed
AC206901.3_FG005	MYB family transcription factor, putative, expressed
AC206941.2_FG002	oleosin, putative, expressed
AC206951.3_FG016	AP2 domain containing protein, expressed
AC206951.3_FG017	AP2 domain containing protein, expressed
AC206955.3_FG004	PHD finger family protein, putative, expressed
AC206968.3_FG003	proteasome subunit, putative, expressed
AC206980.3_FG007	RIPER1 - Ripening-related family protein precursor, expressed
AC206989.4_FG002	IBR domain containing protein, putative, expressed
AC206999.1_FG002	expressed protein
AC207008.3_FG005	coatomer subunit epsilon, putative, expressed
AC207012.3_FG001	histidine kinase, putative, expressed
AC207019.3_FG003	senescence-induced receptor-like serine/threonine-protein kinase precursor, putative, expressed
AC207043.3_FG002	VQ domain containing protein, putative, expressed
AC207043.3_FG004	nucleotide pyrophosphatase/phosphodiesterase, putative, expressed
AC207046.3_FG007	plasma membrane ATPase, putative, expressed
AC207080.3_FG005	zinc knuckle family protein, expressed
AC207107.4_FG002	expressed protein
AC207119.3_FG003	dolichyl-diphosphooligosaccharide--protein glycosyltransferase 48 kDasubunit precursor, putative, expressed
AC207205.3_FG004	expressed protein
AC207225.3_FG003	expressed protein
AC207226.3_FG002	NB-ARC domain containing protein, expressed
AC207231.3_FG001	calcium-transporting ATPase, plasma membrane-type, putative, expressed
AC207239.3_FG001	1,3-beta-glucan synthase component domain containing protein, expressed
AC207265.3_FG002	ANTH/ENTH domain containing protein, putative, expressed
AC207266.3_FG002	CESA8 - cellulose synthase, expressed
AC207309.3_FG005	serine/threonine-protein kinase RIO-like, putative, expressed
AC207309.3_FG010	retrotransposon protein, putative, unclassified, expressed
AC207321.3_FG003	expressed protein
AC207323.3_FG015	trehalose-6-phosphate synthase, putative, expressed
AC207328.3_FG003	expressed protein
AC207342.3_FG001	RWP-RK domain-containing protein, putative, expressed
AC207342.3_FG007	OsFBX13 - F-box domain containing protein, expressed
AC207342.3_FG008	N-rich protein, putative, expressed
AC207347.3_FG005	transporter family protein, putative, expressed
AC207374.3_FG004	sister chromatid cohesion 2, putative, expressed
AC207383.3_FG003	retrotransposon protein, putative, LINE subclass, expressed
AC207392.3_FG001	carboxyl-terminal peptidase, putative, expressed
AC207427.3_FG005	retrotransposon protein, putative, unclassified, expressed
AC207454.3_FG005	respiratory burst oxidase, putative, expressed
AC207472.3_FG001	expressed protein
AC207477.2_FG001	calcium-binding mitochondrial protein anon-60Da, putative, expressed
AC207533.2_FG002	WD domain and HEAT domain containing protein, putative, expressed
AC207546.3_FG004	importin subunit beta, putative, expressed
AC207565.2_FG004	expressed protein
AC207620.2_FG007	expressed protein
AC207627.2_FG001	phosphoesterase family protein, putative, expressed
AC207627.2_FG002	TKL_IRAK_DUF26-lh.9 - DUF26 kinases have homology to DUF26 containing loci, expressed
AC207628.4_FG002	IQ calmodulin-binding motif family protein, putative, expressed
AC207628.4_FG003	expressed protein
AC207628.4_FG005	outer mitochondrial membrane porin, putative, expressed
AC207628.4_FG009	endonuclease/exonuclease/phosphatase family domain containing protein, expressed
AC207628.4_FG010	methyltransferase, putative, expressed
AC207628.4_FG011	IQ calmodulin-binding motif family protein, putative, expressed
AC207638.3_FG005	zinc finger, C3HC4 type domain containing protein, expressed
AC207646.4_FG001	DUF250 domain containing protein, putative, expressed
AC207652.3_FG001	DNAJ heat shock N-terminal domain-containing protein, putative, expressed
AC207655.2_FG002	exosome complex exonuclease, putative, expressed
AC207655.2_FG003	AATF, putative, expressed
AC207656.3_FG002	auxin response factor 18, putative, expressed
AC207678.4_FG002	Core histone H2A/H2B/H3/H4 domain containing protein, putative, expressed
AC207680.2_FG001	bZIP transcription factor domain containing protein, expressed
AC207687.3_FG002	phospholipase D, putative, expressed
AC207699.4_FG006	AMP-binding enzyme, putative, expressed
AC207722.2_FG009	chlorophyll A-B binding protein, putative, expressed
AC207728.2_FG003	suppressor of Mek, putative, expressed
AC207733.3_FG007	expressed protein
AC207743.3_FG001	ribosomal protein L5, putative, expressed
AC207755.3_FG004	DUF292 domain containing protein, expressed
AC207755.3_FG005	amino acid permease family protein, putative, expressed
AC207756.3_FG001	ARF GTPase-activating domain-containing protein, putative, expressed
AC207767.2_FG001	expressed protein
AC207790.2_FG001	expressed protein
AC207793.3_FG001	expressed protein
AC207803.3_FG004	microtubule associated protein, putative, expressed
AC207814.3_FG002	expressed protein
AC207814.3_FG003	homeobox and START domains containing protein, putative, expressed
AC207816.3_FG007	expressed protein
AC207876.3_FG004	glucosyltransferase-11, putative, expressed
AC207876.3_FG007	cyclic nucleotide-gated ion channel 2, putative, expressed
AC207880.3_FG002	ATP synthase, putative, expressed
AC207884.3_FG002	OsLonP3 - Putative Lon protease homologue, expressed
AC207885.3_FG009	auxin response factor, putative, expressed
AC207888.3_FG009	DUF260 domain containing protein, putative, expressed
AC207890.3_FG002	TUDOR protein with multiple SNc domains, putative, expressed
AC207899.3_FG005	AMP-binding domain containing protein, expressed
AC208023.3_FG001	protein transport protein SEC61 subunit gamma, putative, expressed
AC208026.3_FG005	retrotransposon protein, putative, unclassified, expressed
AC208031.3_FG002	expressed protein
AC208031.3_FG005	expressed protein
AC208077.3_FG004	retrotransposon protein, putative, unclassified, expressed
AC208082.3_FG008	Brix domain containing protein, putative, expressed
AC208110.2_FG001	WRKY37, expressed
AC208110.2_FG005	peptide transporter PTR2, putative, expressed
AC208110.2_FG006	expressed protein
AC208110.2_FG007	seed specific protein Bn15D1B, putative, expressed
AC208110.2_FG011	peptide transporter PTR2, putative, expressed
AC208126.3_FG001	gamma-thionin family domain containing protein, expressed
AC208201.3_FG001	mitochondrial carrier protein, putative, expressed
AC208201.3_FG002	protein phosphatase 2C, putative, expressed
AC208201.3_FG003	expressed protein
AC208204.3_FG006	hsp20/alpha crystallin family protein, putative, expressed
AC208217.3_FG001	expressed protein
AC208221.3_FG002	BBTI2 - Bowman-Birk type bran trypsin inhibitor precursor, expressed
AC208236.3_FG003	expressed protein
AC208327.4_FG002	OsGrx_S15.1 - glutaredoxin subgroup II, expressed
AC208327.4_FG003	WD domain, G-beta repeat domain containing protein, expressed
AC208327.4_FG006	N-acetylglucosaminyltransferase, putative, expressed
AC208337.2_FG003	40S ribosomal protein S23, putative, expressed
AC208337.2_FG004	expressed protein
AC208338.3_FG010	vesicle transport v-SNARE protein, putative, expressed
AC208341.4_FG005	pleckstrin homology domain-containing protein, putative, expressed
AC208341.4_FG006	expressed protein
AC208341.4_FG007	peroxidase precursor, putative, expressed
AC208341.4_FG008	scramblase, putative, expressed
AC208346.3_FG004	exo70 exocyst complex subunit domain containing protein, expressed
AC208348.3_FG012	expressed protein
AC208355.3_FG002	TKL_IRAK_CR4L.6 - The CR4L subfamily has homology with Crinkly4, expressed
AC208358.3_FG005	expressed protein
AC208406.3_FG002	amine oxidase, putative, expressed
AC208406.3_FG003	transferase family protein, putative, expressed
AC208411.3_FG013	thiol protease SEN102 precursor, putative, expressed
AC208418.3_FG009	exo70 exocyst complex subunit domain containing protein, expressed
AC208422.3_FG001	EMB1379, putative, expressed
AC208422.3_FG002	EMB1379, putative, expressed
AC208423.3_FG002	hydrolase, alpha/beta fold family domain containing protein, expressed
AC208427.3_FG002	ulp1 protease family, C-terminal catalytic domain containing protein, expressed
AC208427.3_FG010	phosphatidylinositol 3- and 4-kinase family protein, putative, expressed
AC208429.3_FG004	zinc knuckle domain containing protein, expressed
AC208434.3_FG001	expressed protein
AC208436.3_FG007	PHD finger family protein, putative, expressed
AC208439.3_FG002	CAMK_CAMK_like.13 - CAMK includes calcium/calmodulin depedent protein kinases, expressed
AC208440.3_FG003	expressed protein
AC208440.3_FG004	PHD-finger domain containing protein, putative, expressed
AC208458.3_FG011	Ser/Thr protein phosphatase family protein, putative, expressed
AC208513.3_FG008	FG-GAP repeat-containing protein, putative, expressed
AC208515.3_FG003	COBRA-like protein 7 precursor, putative, expressed
AC208521.3_FG002	PHD finger protein, putative, expressed
AC208530.3_FG003	zinc knuckle family protein, expressed
AC208545.3_FG004	CESA1 - cellulose synthase, expressed
AC208551.3_FG008	nodulin, putative, expressed
AC208559.3_FG002	CAF1 family ribonuclease containing protein, putative, expressed
AC208559.3_FG003	glutathione S-transferase, putative, expressed
AC208564.3_FG004	OsMADS34 - MADS-box family gene with MIKCc type-box, expressed
AC208569.3_FG005	expressed protein
AC208571.4_FG001	HAD-superfamily hydrolase, subfamily IA, variant 3 containing protein, expressed
AC208576.3_FG001	expressed protein
AC208608.3_FG001	nodulin, putative, expressed
AC208616.3_FG002	eukaryotic translation initiation factor 2 subunit beta, putative, expressed
AC208622.2_FG003	parafibromin, putative, expressed
AC208625.3_FG004	expressed protein
AC208641.3_FG005	ammonium transporter protein, putative, expressed
AC208641.3_FG008	ammonium transporter protein, putative, expressed
AC208644.2_FG005	expressed protein
AC208649.4_FG003	KH domain containing protein, putative, expressed
AC208652.3_FG010	phox domain-containing protein, putative, expressed
AC208663.3_FG002	expressed protein
AC208665.3_FG004	GTP-binding protein lepA, putative, expressed
AC208687.3_FG002	cysteine-rich receptor-like protein kinase 8 precursor, putative, expressed
AC208702.3_FG007	expressed protein
AC208711.3_FG005	retrotransposon protein, putative, LINE subclass, expressed
AC208717.4_FG005	expressed protein
AC208788.3_FG005	expressed protein
AC208826.3_FG005	NAD dependent epimerase/dehydratase family protein, putative, expressed
AC208827.3_FG001	leucine-rich repeat family protein, putative, expressed
AC208831.1_FG001	DUF292 domain containing protein, expressed
AC208838.3_FG002	Inositol 1, 3, 4-trisphosphate 5/6-kinase, putative, expressed
AC208847.4_FG001	strictosidine synthase, putative, expressed
AC208860.3_FG002	expressed protein
AC208892.3_FG005	stress-related protein, putative, expressed
AC208897.3_FG003	expressed protein
AC208897.3_FG004	transporter family protein, putative, expressed
AC208900.3_FG002	expressed protein
AC208907.3_FG005	cyclin-like F-box, putative, expressed
AC208908.3_FG002	ethylene-responsive transcription factor, putative, expressed
AC208914.3_FG007	amine oxidase, putative, expressed
AC208915.3_FG010	chlorophyll A-B binding protein, putative, expressed
AC208916.3_FG003	expressed protein
AC208920.3_FG001	oxidoreductase, 2OG-FeII oxygenase domain containing protein, putative, expressed
AC208929.3_FG004	endoglucanase, putative, expressed
AC208930.3_FG007	expressed protein
AC208968.3_FG003	fumarylacetoacetase, putative, expressed
AC208975.3_FG001	protein kinase, putative, expressed
AC208975.3_FG002	protein kinase, putative, expressed
AC208975.3_FG005	oxidoreductase, short chain dehydrogenase/reductase family protein, putative, expressed
AC208976.3_FG003	leucine-rich repeat family protein, putative, expressed
AC208985.3_FG006	plastocyanin-like domain containing protein, putative, expressed
AC209019.3_FG003	DEAD-box ATP-dependent RNA helicase 30, putative, expressed
AC209029.2_FG002	Protein kinase domain containing protein, expressed
AC209050.3_FG001	E1-E2 ATPase domain containing protein, expressed
AC209050.3_FG003	WRKY28, expressed
AC209053.2_FG002	roothairless 1, putative, expressed
AC209073.3_FG002	expressed protein
AC209074.3_FG003	expressed protein
AC209074.3_FG007	STE_MEKK_ste11_MAP3K.21 - STE kinases include homologs to sterile 7, sterile 11 and sterile 20 from yeast, expressed
AC209075.3_FG007	DUF630/DUF632 domains containing protein, putative, expressed
AC209078.3_FG003	expressed protein
[truncated: 38,849 more rows]

## Sheet: Table 3. Symbols
Supplementary Table 3 - Example gene symbols
Citation:	Portwood, John L., Margaret R. Woodhouse, Ethalinda K. Cannon, Jack M. Gardiner, Lisa C. Harper, Mary L. Schaeffer, Jesse R. Walsh, Taner Z. Sen, Kyoung Tak Cho, David A. Schott, Bremen L. Braun, Miranda Dietze, Brittney Dunfee, Christine G. Elsik, Nancy Manchanda, Ed Coe, Marty Sachs, Philip Stinard, Josh Tolbert, Shane Zimmerman, and Carson M. Andorf. 2019. “MaizeGDB 2018: The Maize Multi-Genom…
DOI:	doi: 10.1093/nar/gkr944
Link:	https://maizegdb.org/gene_center/gene
File:	gene_model_xref_v3.txt
Notes:	(1) Genes with no assigned symbols were removed
	(2) Only the first symbol was included if genes had multiple symbols seperated by a comma
	(3) Manually added gene symbols for ZmAN2, ZmKSL2, ZmKO2, ZmCYP71Z18 and ZmKR2 (first 5 genes in the list)
genes	v3_locus
GRMZM2G044481	ZmAN2
AC214360.3_FG001	ZmKSL2
GRMZM2G067591	ZmCYP71Z18
GRMZM2G073929	ZmKR2
GRMZM2G161472	ZmKO2
AC148152.3_FG005	Bx13
AC148152.3_FG008	sfr2
AC148167.6_FG001	pco110259
AC149475.2_FG002	IDP850
AC149475.2_FG005	jmj20
AC149475.2_FG007	hagtf38
AC149818.2_FG001	ras18B1
AC149818.2_FG009	rtcl1
AC149829.2_FG004	bhlh97
AC152495.1_FG002	rp1
AC155376.2_FG005	glu4
AC155377.1_FG001	myo1
AC155434.2_FG005	glk59
AC155434.2_FG006	dof47
AC155622.2_FG001	pco096800
AC155622.2_FG004	pco096800
AC165171.2_FG002	wrky120
AC165178.2_FG004	myb35
AC166636.1_FG008	IDP871
AC177897.2_FG002	si683003c04
AC177924.2_FG001	bhlh4
AC184831.3_FG005	gata22
AC184831.3_FG008	gata36
AC185226.4_FG001	tola1
AC185464.3_FG003	umc1524
AC185478.4_FG005	mmp3
AC186524.3_FG005	hmg101
AC186577.3_FG006	pmei49
AC186606.4_FG003	bzip126
AC187098.4_FG011	pco116187
AC187157.4_FG001	ereb186
AC187157.4_FG005	hb52
AC187262.4_FG007	umc1811
AC187891.3_FG006	ofp39
AC189750.4_FG004	aprl1
AC189771.3_FG001	cl2102_3
AC189879.3_FG003	ago101
AC190609.3_FG001	bzip81
AC190623.3_FG001	pco070877
AC190734.2_FG003	tcptf6
AC190788.2_FG005	msh4
AC191109.3_FG001	cle14
AC191534.3_FG003	vim104
AC193630.3_FG003	wrky39
AC193767.3_FG003	abi10
AC193786.3_FG005	bhlh54
AC194022.3_FG013	umc1970
AC194056.3_FG008	vq21
AC194254.3_FG004	pmei50
AC194341.4_FG003	sun5
AC194362.3_FG003	wrky5
AC194965.4_FG004	gata12
AC194970.5_FG001	ggps1
AC194970.5_FG002	bzr7
AC195147.3_FG001	mab1
AC195340.3_FG001	tua3
AC195340.3_FG004	iaa20
AC195874.2_FG002	ap17
AC196110.4_FG004	psei9
AC196465.3_FG006	ddt5
AC196470.3_FG007	bnlg2235
AC196475.3_FG004	bm3
AC196475.3_FG005	nactf77
AC196489.3_FG002	rpl12
AC197146.3_FG002	myb69
AC197246.3_FG001	ras11G1
AC197246.3_FG003	cl1797_4
AC197672.3_FG002	acc1
AC197699.3_FG001	zmm3
AC197699.3_FG002	ccd10
AC197705.4_FG001	pdc1
AC197705.4_FG007	TIDP3511
AC197717.3_FG002	ncp1
AC197764.4_FG003	zim30
AC198169.4_FG004	cl9072_1(438)
AC198366.3_FG004	gras29
AC198403.3_FG001	ereb106
AC198414.2_FG001	cle2
AC198418.3_FG005	rh4
AC198481.3_FG004	trrap1
AC198518.3_FG005	bhlh58
AC198725.4_FG004	ofp19
AC198725.4_FG009	wrky64
AC198937.4_FG005	nactf37
AC198979.4_FG009	ereb95
AC199043.2_FG002	cle8
AC199526.5_FG003	caf2
AC199541.4_FG001	pco128943a
AC199782.5_FG001	pco094838
AC199782.5_FG003	tcptf19
AC199820.4_FG006	mybr29
AC200038.4_FG011	ereb120
AC200057.4_FG007	bzip47
AC200124.3_FG005	gras66
AC201815.4_FG001	dek55
AC201832.3_FG006	ca5p18
AC202185.4_FG004	umc1461
AC202435.3_FG003	pap4
AC202439.3_FG006	Zm00001d037242
AC202864.3_FG002	gata25
AC203294.3_FG012	vq45
AC203535.4_FG001	myb2
AC203535.4_FG002	nactf90
AC203865.3_FG001	cpp13
AC203957.3_FG004	bzip40
AC203966.5_FG005	ga20ox1
AC204007.3_FG008	cl16119_1c
AC204212.4_FG001	mybr78
AC204292.4_FG006	AY110435
AC204352.3_FG012	Zm00001d038617
AC204359.3_FG005	IDP387
AC204502.4_FG006	ofp36
AC204530.4_FG002	pco097891
AC204621.4_FG006	gras59
AC204711.3_FG002	xyl6
AC205122.4_FG003	IDP1688
AC205250.3_FG004	cchh6
AC205274.3_FG001	prp1
AC205419.3_FG001	pco065609(689)
AC205471.4_FG003	hsftf16
AC205484.3_FG005	nactf58
AC205502.4_FG004	AC205502.4_FG004
AC205562.3_FG002	wrky97
AC205574.3_FG006	tcptf33
AC205608.4_FG004	pco106840
AC205703.4_FG002	cl6346_1(433)
AC205703.4_FG006	gl8
AC206165.3_FG007	hsftf15
AC206217.2_FG006	znf3
AC206223.3_FG006	AW215946
AC206319.2_FG004	cle29
AC206425.3_FG002	TIDP3412
AC206638.3_FG007	vq12
AC206901.3_FG005	myb132
AC206941.2_FG002	ole3
AC206951.3_FG016	ereb181
AC206951.3_FG017	ereb182
AC207043.3_FG002	vq29
AC207043.3_FG004	pap5
AC207342.3_FG001	nlp5
AC207656.3_FG002	arftf19
AC207722.2_FG009	lhcb2
AC207888.3_FG009	lbd15
AC207890.3_FG002	cl152_1
AC208031.3_FG002	umc1713
AC208110.2_FG001	wrky112
AC208204.3_FG006	hsp10
AC208327.4_FG006	pco120288
AC208663.3_FG002	nactf34
AC209050.3_FG001	mha9
AC209050.3_FG003	wrky114
AC209206.3_FG011	ago1b
AC209208.3_FG001	si606029c09c
AC209208.3_FG002	pip1b
AC209242.3_FG003	cl347_1
AC209257.4_FG006	ereb100
AC209374.4_FG002	mecs2
AC209377.3_FG003	IDP227
AC209784.3_FG007	hsp6
AC209784.3_FG011	thx27
AC209810.3_FG002	cl903_-1
AC209819.3_FG009	dof44
AC209819.3_FG012	rop7
AC209858.4_FG004	hagtf1
AC210003.2_FG004	pco083783
AC210013.4_FG005	ipt5
AC210013.4_FG012	tlc9
AC210013.4_FG013	wtf2
AC210013.4_FG018	umc1679
AC210168.4_FG003	umc1174
AC210173.4_FG005	fah1
AC210193.4_FG002	umc1767
AC210314.3_FG006	pco076336b
AC210616.4_FG005	eil5
AC210731.3_FG002	cle15
AC210848.3_FG004	dsy2
AC211276.4_FG008	pve1
AC211394.4_FG004	acp1
AC211401.4_FG003	si614087a01
AC211478.3_FG004	nactf100
AC211652.4_FG002	fha10
AC212023.4_FG004	pmei48
AC212219.3_FG005	AC212219.3_FG005
AC212347.3_FG002	cle13
AC212451.4_FG009	pme21
AC212684.3_FG012	emp17
AC212823.4_FG003	mads65
AC212835.3_FG007	AC212835.3_FG007
AC212859.3_FG008	nactf103
AC213099.3_FG001	umc1917
AC213432.2_FG004	pmei47
AC213463.3_FG002	pco099852b
AC213463.3_FG007	TIDP9255
AC213524.3_FG003	tcptf42
AC213600.3_FG002	rz382a
AC213654.3_FG001	csu180
AC213666.3_FG003	ereb70
AC213857.4_FG003	Zm00001d031419
AC213884.3_FG001	rbp1
AC213884.3_FG002	myb119
AC214168.3_FG001	e2f17
AC214448.3_FG007	umc2268
AC214507.3_FG001	cfm6
AC214635.3_FG002	cl34400_1b
AC214648.3_FG005	lbd39
AC214791.2_FG002	pebp20
AC215198.3_FG002	ppr2263
AC215201.3_FG005	cps2
AC215260.3_FG001	pco115104
AC215260.3_FG003	hct7
AC215690.3_FG002	sacd11
AC216247.3_FG001	hsftf19
AC216731.3_FG001	bhlh89
AC216886.3_FG002	TIDP3730
AC217050.4_FG001	TIDP3052
AC217050.4_FG007	tps7
AC217051.3_FG006	pebp5
AC217264.3_FG001	mbd103
AC217264.3_FG005	myb58
AC217293.3_FG007	srk1
AC217358.3_FG003	cl27369_1
AC217358.3_FG005	phb4
AC217401.3_FG002	pco134646
AC217415.3_FG004	se1
AC217499.3_FG001	TIDP3322
AC217665.3_FG005	cl4777_1c
AC217842.3_FG001	ptk4
AC217910.3_FG004	IDP856
AC217910.3_FG006	lbd9
AC217962.3_FG005	cl59406_1
AC217965.2_FG012	tha8
AC217975.3_FG001	pdk4
AC218148.2_FG008	cl42883_1
AC218972.3_FG001	pco102994b
AC218973.3_FG003	lbd18
AC218998.2_FG011	cpps4
AC219006.2_FG007	rad51e
AC219020.4_FG002	glk33
AC219061.2_FG007	pco094349
AC219190.3_FG002	gpm68
AC220970.4_FG002	umc1240
AC225127.3_FG003	ms44
AC225147.4_FG003	alf15
AC225176.2_FG003	umc1330
AC225193.3_FG003	IDP665
AC226235.2_FG001	irl1
AC226235.2_FG002	cl59140_1
AC230011.2_FG002	rp3
AC230013.2_FG007	pco155588a
AC232238.2_FG004	lrs1
AC233751.1_FG002	not1
AC233850.1_FG002	pmei46
AC233850.1_FG003	pmei45
AC233850.1_FG005	e2f4
AC233853.1_FG002	bzip117
AC233865.1_FG003	nactf121
AC233866.1_FG006	elfa11
AC233870.1_FG006	pco129004(525)
AC233871.1_FG008	c3h33
AC233878.1_FG004	cap4
AC233879.1_FG002	esp1
AC233880.1_FG006	nlp1
AC233885.1_FG001	umc2512
AC233888.1_FG001	umc259a
AC233888.1_FG002	col7
AC233893.1_FG003	AC233893.1_FG003
AC233899.1_FG002	bhlh21
AC233899.1_FG004	hb12
AC233912.1_FG001	mads21
AC233933.1_FG001	ereb128
AC233935.1_FG005	dof30
AC233943.1_FG002	ra2
AC233945.1_FG003	csu240
AC233950.1_FG002	tb1
AC233953.1_FG005	hak2
AC233955.1_FG003	nas7
AC233959.1_FG003	cle18
AC233960.1_FG002	aox1
AC233960.1_FG003	glk11
AC233960.1_FG005	bhlh122
AC233961.1_FG001	sdg101
AC233979.1_FG009	cl35348_1
AC234149.1_FG002	lbd37
AC234152.1_FG002	kch6
AC234152.1_FG007	kch6
AC234154.1_FG008	TIDP3610
AC234155.1_FG002	glk25
AC234157.1_FG002	lem1
AC234161.1_FG001	piip1
AC234164.1_FG004	gras42
AC234185.1_FG004	umc1385
AC234185.1_FG006	mads59
AC234190.1_FG002	lac14
AC234199.1_FG003	atm1
AC234203.1_FG004	mrpa10
AC234203.1_FG011	eil13
AC234520.1_FG003	glk9
AC234521.1_FG006	tcptf34
AC234575.1_FG003	thr3
AC235534.1_FG007	ocl2
AC235535.1_FG001	chr126a
AC235541.1_FG002	umc1454
AC235543.1_FG003	umc2524
AC235546.1_FG001	mmc0162
AF546187.1_FG001	az19D1
AF546187.1_FG007	az19D2
AF546188.1_FG005	zp2
AF546188.1_FG007	de30
EF517601.1_FG010	gbptf21
EF517601.1_FG016	mfs18
GRMZM2G000039	cl8900_1
GRMZM2G000052	pao2
GRMZM2G000114	pco073802a
GRMZM2G000158	iaa25
GRMZM2G000171	bzip83
GRMZM2G000236	opr2
GRMZM2G000278	spk1
GRMZM2G000376	mmp108b
GRMZM2G000397	nsa1
GRMZM2G000404	mmc0411
GRMZM2G000423	gpm626
GRMZM2G000510	ucp3
GRMZM2G000520	ereb127
GRMZM2G000531	gpm633
GRMZM2G000566	si606045f03
GRMZM2G000581	xt6
GRMZM2G000608	mlks2
GRMZM2G000610	mterf14
GRMZM2G000615	pco067132
GRMZM2G000623	umc1279
GRMZM2G000633	Zm00001d026382
GRMZM2G000650	pco115693
GRMZM2G000660	si486077g03
GRMZM2G000686	nfya1
GRMZM2G000743	knox3
GRMZM2G000764	pmt1
GRMZM2G000812	sweet4a
GRMZM2G000816	pco089834a
GRMZM2G000818	myb11
GRMZM2G000842	bzip87
GRMZM2G000909	cl18247_1
GRMZM2G000945	umc2515
GRMZM2G000964	thx11
GRMZM2G000973	atg13d
GRMZM2G001048	abi36
GRMZM2G001106	mybr113
GRMZM2G001114	umc1433
GRMZM2G001116	pco135234
GRMZM2G001139	mads43
GRMZM2G001169	umc2279
GRMZM2G001205	znf5
GRMZM2G001221	cbl4
GRMZM2G001223	myb126
GRMZM2G001241	csu861
GRMZM2G001243	prh19
GRMZM2G001272	tubtf14
GRMZM2G001289	hb75
GRMZM2G001304	trps12
GRMZM2G001327	elfa12
GRMZM2G001375	umc1217
GRMZM2G001421	aas10
GRMZM2G001426	gras46
GRMZM2G001444	csu622
GRMZM2G001457	phot1
GRMZM2G001500	bcd1072b(hsp70)
GRMZM2G001508	vsp1
GRMZM2G001530	pza01877
GRMZM2G001639	PCO071075
GRMZM2G001653	pco139896
GRMZM2G001661	IDP1478
GRMZM2G001663	farl1
GRMZM2G001668	pti4
GRMZM2G001696	pck1
GRMZM2G001699	e2f1
GRMZM2G001721	ofp32
GRMZM2G001799	iaa41
GRMZM2G001803	zip1
GRMZM2G001805	si496028c11
GRMZM2G001812	umc83a
GRMZM2G001824	myb134
GRMZM2G001875	myb131
GRMZM2G001887	pco126682d
GRMZM2G001898	aldh21
GRMZM2G001904	ftcl1
GRMZM2G001918	pco070745
GRMZM2G001930	myc7
GRMZM2G001953	rop8
GRMZM2G002023	pco098921
GRMZM2G002075	bzip123
GRMZM2G002100	mpk7
GRMZM2G002115	TIDP3440
GRMZM2G002119	ereb158
GRMZM2G002128	mybr3
GRMZM2G002130	pco134378
GRMZM2G002131	hsftf1
GRMZM2G002142	abh5
GRMZM2G002165	hcf148
GRMZM2G002178	aos2
GRMZM2G002225	knox10
GRMZM2G002260	wi5
GRMZM2G002276	taf1
GRMZM2G002280	pco138005
GRMZM2G002427	cl17205_1
GRMZM2G002515	brl2
GRMZM2G002578	pco142991
GRMZM2G002616	eif6
GRMZM2G002626	cl40113_1
GRMZM2G002652	pzb01021
GRMZM2G002656	Zm00001d037650
GRMZM2G002687	pco072468
GRMZM2G002786	dhn7
GRMZM2G002807	tpi2
GRMZM2G002825	adf10
GRMZM2G002858	IDP2398
GRMZM2G002859	bcd207b
GRMZM2G002879	umc1554
GRMZM2G002903	AI691686
GRMZM2G002915	hb34
GRMZM2G002959	pza00473
GRMZM2G002978	thx26
GRMZM2G003038	uaz7c01c10
GRMZM2G003043	rrb1
GRMZM2G003064	erg28
GRMZM2G003076	TIDP2770
GRMZM2G003090	pco062216(723)
GRMZM2G003124	pco135291b
GRMZM2G003172	IDP705
GRMZM2G003179	copt1
GRMZM2G003182	sig3
GRMZM2G003289	cys4
GRMZM2G003304	hb112
GRMZM2G003318	fbn1
GRMZM2G003368	sacd4
GRMZM2G003406	myb124
GRMZM2G003409	mmc0381
GRMZM2G003411	mmp94
GRMZM2G003424	c3h45
GRMZM2G003426	si603038d03
GRMZM2G003466	ereb101
GRMZM2G003489	hsftf17
GRMZM2G003501	gl4
GRMZM2G003509	hb119
GRMZM2G003514	zag5
GRMZM2G003551	wrky118
GRMZM2G003558	eil2
GRMZM2G003565	rcc2
GRMZM2G003607	TIDP3263
GRMZM2G003640	IDP3803
GRMZM2G003669	vq32
GRMZM2G003715	nactf61
GRMZM2G003732	AW225120
GRMZM2G003734	si486029c04
GRMZM2G003762	alp1
GRMZM2G003765	morf9
GRMZM2G003789	pco098114
GRMZM2G003794	xyl8
GRMZM2G003838	pmei44
GRMZM2G003852	cl10369_1
GRMZM2G003869	asg49
GRMZM2G003883	phm15899
GRMZM2G003897	pco085368
GRMZM2G003927	ra1
GRMZM2G003944	tcptf2
GRMZM2G003947	si605011d10
GRMZM2G003988	pco141112
GRMZM2G003992	mlkp3
GRMZM2G004012	umc1431
GRMZM2G004060	wrky15
GRMZM2G004090	myb87
GRMZM2G004140	pco116249
GRMZM2G004183	AY109934
GRMZM2G004207	Zm00001d020631
GRMZM2G004222	si606013c03
GRMZM2G004259	TIDP3048
GRMZM2G004301	cl218_1
GRMZM2G004320	pco145633
GRMZM2G004334	hb10
GRMZM2G004349	pco082817
GRMZM2G004356	bhlh159
GRMZM2G004377	umc1675
GRMZM2G004397	pco148373a
GRMZM2G004435	pgl10
GRMZM2G004440	ysl18
GRMZM2G004459	IDP1633
GRMZM2G004468	mkk3
GRMZM2G004483	cct2
GRMZM2G004528	mips2
GRMZM2G004531	nactf79
GRMZM2G004534	pyk2
GRMZM2G004548	platz11
GRMZM2G004582	pco121275a
GRMZM2G004583	ij1
GRMZM2G004619	grftf2
GRMZM2G004641	hb64
GRMZM2G004663	nlp16
GRMZM2G004683	dfr1
GRMZM2G004690	ult1
GRMZM2G004696	iaa8
GRMZM2G004699	gpm65
GRMZM2G004748	AY110310
GRMZM2G004856	xyl4
GRMZM2G004878	umc1511
GRMZM2G004880	pdrp2
GRMZM2G004898	smr7
GRMZM2G004927	pme31
GRMZM2G004957	hb18
GRMZM2G004959	limtf10
GRMZM2G004990	umc1456
GRMZM2G004996	pco100001
GRMZM2G005024	orp2
GRMZM2G005036	pco071606
GRMZM2G005040	hak11
GRMZM2G005066	c1
GRMZM2G005080	uaz237a(prc)
GRMZM2G005082	cl23834_1
GRMZM2G005103	cl34424_1
GRMZM2G005112	mybr46
GRMZM2G005126	c3h24
GRMZM2G005155	mads9
GRMZM2G005207	wrky63
GRMZM2G005284	arftf38
GRMZM2G005298	sbe3
GRMZM2G005301	ereb144
GRMZM2G005304	atg7
GRMZM2G005310	met5
GRMZM2G005346	pza02450
GRMZM2G005350	mkp1
GRMZM2G005353	yab14
GRMZM2G005459	pco079656
GRMZM2G005483	sun4
GRMZM2G005536	dpold3b
GRMZM2G005562	pco073276b
GRMZM2G005619	cyc5
GRMZM2G005624	gt1
GRMZM2G005633	ctb1
GRMZM2G005652	umc1396
GRMZM2G005710	dhar2
GRMZM2G005732	GRMZM2G005732
GRMZM2G005753	pco093020
GRMZM2G005788	pco061453
GRMZM2G005815	hsftf3
GRMZM2G005840	xer3
GRMZM2G005844	dng1
GRMZM2G005848	IDP1458
GRMZM2G005849	gfa1
GRMZM2G005859	pco098379
GRMZM2G005869	IDP300
GRMZM2G005887	cys2
GRMZM2G005909	ggps4
GRMZM2G005938	ppr*-59040
GRMZM2G005939	pco093521b
GRMZM2G005954	zim13
GRMZM2G005990	cl1288_1a
GRMZM2G005991	plt5
GRMZM2G005998	TIDP3662
GRMZM2G006042	arftf28
GRMZM2G006047	AY110426
GRMZM2G006071	umc1426
GRMZM2G006219	pco129120a
GRMZM2G006229	si486058g10
GRMZM2G006246	fha14
GRMZM2G006277	IDP667
GRMZM2G006287	cl61420_1
GRMZM2G006297	si707014d12
GRMZM2G006324	dsul1
GRMZM2G006341	cl37086_1
GRMZM2G006352	myb24
GRMZM2G006404	cdpk16
GRMZM2G006428	pco071849
GRMZM2G006429	csu634
GRMZM2G006452	smc2
GRMZM2G006453	pco092373
GRMZM2G006477	glk17
GRMZM2G006493	c3h54
GRMZM2G006497	wrky49
GRMZM2G006578	bzip7
GRMZM2G006585	fl3
GRMZM2G006631	bhlh160
GRMZM2G006661	mlkt2
GRMZM2G006707	gte102
GRMZM2G006721	cyc15
GRMZM2G006736	sig1A
GRMZM2G006745	ereb22
GRMZM2G006752	eil4
GRMZM2G006765	act4
GRMZM2G006790	pco145926
GRMZM2G006791	pco131924a
GRMZM2G006806	cl14448_1
GRMZM2G006871	gbptf11
GRMZM2G006894	mha4
GRMZM2G006942	ufg17
GRMZM2G006953	ntf2
GRMZM2G006964	ga2ox2
GRMZM2G007055	umc2185
GRMZM2G007060	cl51637_1
GRMZM2G007063	ohp2
GRMZM2G007103	IDP756
GRMZM2G007120	umc2350
GRMZM2G007130	cyc16
GRMZM2G007134	bgh2
GRMZM2G007151	drepp2
GRMZM2G007201	cl6208_1
GRMZM2G007206	TIDP2814
GRMZM2G007249	acco2
GRMZM2G007260	umc1478
GRMZM2G007276	csu204(uce)
GRMZM2G007277	invan4
GRMZM2G007381	uce1
GRMZM2G007404	umc2355
GRMZM2G007406	ereb173
GRMZM2G007453	apo1
GRMZM2G007466	AY107329
GRMZM2G007475	umc2344
GRMZM2G007477	umc2172
GRMZM2G007489	cl525_1(477)
GRMZM2G007555	cbl11
GRMZM2G007587	TIDP2650
GRMZM2G007590	umc2342
GRMZM2G007681	rmr6
GRMZM2G007685	expb10c
GRMZM2G007695	gpm217b
GRMZM2G007698	mmp63
GRMZM2G007721	pza00048
GRMZM2G007729	hsp22
GRMZM2G007736	trps8
GRMZM2G007754	pap6
GRMZM2G007791	ago2a
GRMZM2G007848	mpk19
GRMZM2G007914	IDP2388
GRMZM2G007915	umc1139
GRMZM2G007922	chr125a
GRMZM2G007928	bbi1
GRMZM2G007957	umc2219
GRMZM2G007969	pco081680
GRMZM2G008029	wrky31
GRMZM2G008047	pmei43
GRMZM2G008058	cl27068_1
GRMZM2G008060	cl44168_1
GRMZM2G008072	phi308707
GRMZM2G008093	tubg3
GRMZM2G008122	mha6
GRMZM2G008166	bzip125
GRMZM2G008175	pco125757
GRMZM2G008216	cda2
GRMZM2G008226	trps4
GRMZM2G008234	ereb114
GRMZM2G008247	glu2
GRMZM2G008259	alf18
GRMZM2G008263	gbss1
GRMZM2G008271	bap1a
GRMZM2G008273	pco080956
GRMZM2G008286	hb86
GRMZM2G008290	umc2181
GRMZM2G008326	IDP2364
GRMZM2G008327	cdc2
GRMZM2G008356	abi22
GRMZM2G008367	GRMZM2G008367
GRMZM2G008369	bnlg1434
GRMZM2G008374	nactf24
GRMZM2G008403	bap1b
GRMZM2G008425	hdac7
GRMZM2G008464	nad3
GRMZM2G008501	cl40803_1a
GRMZM2G008558	gbptf10
GRMZM2G008593	pme13
GRMZM2G008623	AY109645
GRMZM2G008638	umc1789
GRMZM2G008651	cle20
GRMZM2G008687	umc1710
GRMZM2G008691	bhlh36
GRMZM2G008728	pco142427
GRMZM2G008792	ckx12
GRMZM2G008819	GRMZM2G008819
GRMZM2G008864	IDP723
GRMZM2G008898	bhlh73
GRMZM2G008913	zp1
GRMZM2G008919	pco097999
GRMZM2G009014	TIDP3353
GRMZM2G009019	mmp140
GRMZM2G009025	cel21
GRMZM2G009048	psan2
GRMZM2G009060	glk26
GRMZM2G009070	murE1
GRMZM2G009196	pco081127
GRMZM2G009208	rmr2
GRMZM2G009223	Zm00001d021653
GRMZM2G009232	IDP739
GRMZM2G009320	cl24572_1
GRMZM2G009326	IDP622
GRMZM2G009353	hak12
GRMZM2G009359	es4
GRMZM2G009387	umc2545
GRMZM2G009406	dof2
GRMZM2G009412	rpl44
GRMZM2G009443	cip1
GRMZM2G009448	grp2
GRMZM2G009465	csu1138
GRMZM2G009478	bhlh157
GRMZM2G009479	lox11
GRMZM2G009506	sln1
GRMZM2G009530	gata9
GRMZM2G009571	si486055b11
GRMZM2G009598	ereb159
GRMZM2G009724	mab20
GRMZM2G009779	pht8
GRMZM2G009785	sxd1
GRMZM2G009792	aasr10
GRMZM2G009800	pht12
GRMZM2G009808	aco3
GRMZM2G009845	imp2
GRMZM2G009888	si605090c10
GRMZM2G009892	nactf32
GRMZM2G009895	pco090181a
GRMZM2G009928	IDP532
GRMZM2G009958	TIDP3715
GRMZM2G009994	cl11096_1
GRMZM2G009995	pco081548
GRMZM2G010034	mmp172
GRMZM2G010037	si707100e12
GRMZM2G010044	PCO109372
GRMZM2G010046	smk6
GRMZM2G010056	umc2082
GRMZM2G010085	chr126b
GRMZM2G010093	cbl6
GRMZM2G010100	ereb142
GRMZM2G010152	hma11
GRMZM2G010196	ycf54
GRMZM2G010221	cyp15
GRMZM2G010251	nrt1
GRMZM2G010257	arpp2a-3
GRMZM2G010280	nrt2
GRMZM2G010290	dof23
GRMZM2G010298	cl12955_1
GRMZM2G010302	dip1
GRMZM2G010333	vq25
GRMZM2G010342	cl48276_1
GRMZM2G010353	vp8
GRMZM2G010356	tps17
GRMZM2G010357	umc1463
GRMZM2G010362	cdo98b
GRMZM2G010447	umc1985
GRMZM2G010491	IDP1421
GRMZM2G010551	IDP176
GRMZM2G010555	GRMZM2G010555
GRMZM2G010649	pco083693
GRMZM2G010669	zmm1
GRMZM2G010693	pco126676
GRMZM2G010783	pco074618
GRMZM2G010797	cl32758_1
GRMZM2G010834	pco145520
GRMZM2G010855	prh5
GRMZM2G010861	pco105010
GRMZM2G010868	plt2
GRMZM2G010871	hsftf24
GRMZM2G010884	umc1267
GRMZM2G010920	glk18
GRMZM2G010929	hb26
GRMZM2G010937	fim1
GRMZM2G010960	limtf12
GRMZM2G010973	si707003b08b
GRMZM2G010991	IDP469
GRMZM2G011098	pco136841
GRMZM2G011110	ereb13
GRMZM2G011119	bzip63
GRMZM2G011129	nbp1
GRMZM2G011136	csu625
GRMZM2G011151	tps21
GRMZM2G011173	pco071866
GRMZM2G011213	pco079267
GRMZM2G011222	tm18
GRMZM2G011236	ereb62
GRMZM2G011357	id1
GRMZM2G011385	lbd13
GRMZM2G011401	tmm1
GRMZM2G011422	myb108
GRMZM2G011469	sro3
GRMZM2G011491	pco114320
GRMZM2G011513	dba3
GRMZM2G011518	cl33711_2
GRMZM2G011553	Zm00001d039279
GRMZM2G011588	hb33
GRMZM2G011590	si829007e03
GRMZM2G011592	cax3
GRMZM2G011598	nactf44
GRMZM2G011624	hagtf19
GRMZM2G011662	pco110419
GRMZM2G011746	y9
GRMZM2G011789	lec1
GRMZM2G011832	dof32
GRMZM2G011858	fnr2
GRMZM2G011932	gbf1
GRMZM2G011947	gras18
GRMZM2G012012	es1
GRMZM2G012031	AY104465
GRMZM2G012052	ubi7
GRMZM2G012088	pco079863
GRMZM2G012123	bnlg1615
GRMZM2G012160	psei2
GRMZM2G012174	ppr102
GRMZM2G012224	umc1118
GRMZM2G012262	whirly2
GRMZM2G012324	IDP80
GRMZM2G012326	AY110389
GRMZM2G012328	pme6
GRMZM2G012391	umc1612
GRMZM2G012397	psa6
GRMZM2G012413	TIDP3069
GRMZM2G012416	GRMZM2G012416
GRMZM2G012453	bnlg1615
GRMZM2G012501	IDP2385
GRMZM2G012566	AY109929
GRMZM2G012584	gpm316
GRMZM2G012611	mmp22
GRMZM2G012654	cadtfr16
GRMZM2G012690	cl14665_2
GRMZM2G012717	col10
GRMZM2G012724	wrky83
GRMZM2G012758	TIDP3265
GRMZM2G012806	uaz232b(sci)
GRMZM2G012923	pza00270
GRMZM2G012928	si605061e03b
GRMZM2G012966	lyce1
GRMZM2G012970	mmp179
GRMZM2G012999	mterf22
GRMZM2G013002	expb8
GRMZM2G013016	gras7
GRMZM2G013042	cl9439_1
GRMZM2G013128	umc15a
GRMZM2G013152	si486014c02
GRMZM2G013200	umc2291
GRMZM2G013201	umc1931
GRMZM2G013214	aldh11
GRMZM2G013236	cipk23
GRMZM2G013271	ofp22
GRMZM2G013302	ofp21
GRMZM2G013318	pco114058
GRMZM2G013324	gpx11
GRMZM2G013331	umc2092
GRMZM2G013378	bsdtf2
GRMZM2G013391	wrky111
GRMZM2G013398	col6
GRMZM2G013430	sat2
GRMZM2G013461	psei4
GRMZM2G013463	smr1
GRMZM2G013581	myb62
GRMZM2G013600	IDP1468
GRMZM2G013607	IDP1969
GRMZM2G013617	hb38
GRMZM2G013634	IDP1464
GRMZM2G013657	dwil1
GRMZM2G013663	arftf19
GRMZM2G013671	expb5
GRMZM2G013677	cl67235_-1a
GRMZM2G013688	bhlh109
GRMZM2G013726	a4
GRMZM2G013750	pco111061
GRMZM2G013794	sdg128
GRMZM2G013811	pco094517
GRMZM2G013821	hmg2
GRMZM2G013890	pco063423
GRMZM2G013908	pco097658
GRMZM2G013949	IDP867
GRMZM2G013957	AY110240
GRMZM2G013981	pza02480
GRMZM2G013986	pco096605(61)
GRMZM2G014055	scmv1
GRMZM2G014066	din1
GRMZM2G014076	pdi5
GRMZM2G014119	ubi3
GRMZM2G014154	hp2
GRMZM2G014180	pco081507
GRMZM2G014193	pap3
GRMZM2G014240	vpp6
GRMZM2G014295	mmp67
GRMZM2G014303	umc132a(chk)
GRMZM2G014346	hb113
GRMZM2G014376	sad1
GRMZM2G014382	nad5 (homolog)
GRMZM2G014387	pco096827
GRMZM2G014392	vp14
GRMZM2G014397	TIDP3433
GRMZM2G014452	AY110055
GRMZM2G014534	mybr36
GRMZM2G014653	nactf109
GRMZM2G014695	conr1
GRMZM2G014705	end1
GRMZM2G014729	ra3
GRMZM2G014797	aasr7
GRMZM2G014826	umc2407
GRMZM2G014833	pk4
GRMZM2G014839	vq55
GRMZM2G014844	glu3
GRMZM2G014854	si618009f01
GRMZM2G014902	cca1
GRMZM2G014914	pip2e
GRMZM2G014975	atg8e
GRMZM2G014977	TIDP3125
GRMZM2G014981	gpat21
GRMZM2G014994	pco079729
GRMZM2G015005	IDP352
GRMZM2G015021	myb16
GRMZM2G015037	tcptf24
GRMZM2G015080	gras37
GRMZM2G015097	cpp2
GRMZM2G015100	pco125307
GRMZM2G015127	adf13
GRMZM2G015132	dla1
GRMZM2G015219	mmp135
GRMZM2G015238	pco126705
GRMZM2G015277	chr126b
GRMZM2G015281	ereb4
GRMZM2G015285	hrbp1
GRMZM2G015287	uce12
GRMZM2G015295	ahh1
GRMZM2G015324	cbl9
GRMZM2G015344	nrh5
GRMZM2G015384	arp4
GRMZM2G015419	lox10
GRMZM2G015433	wrky119
GRMZM2G015534	o2
GRMZM2G015578	gg1
GRMZM2G015605	nac1
GRMZM2G015642	pco129304b
GRMZM2G015666	bhlh33
GRMZM2G015703	php20909b
GRMZM2G015708	GRMZM2G015708
GRMZM2G015730	txln1
GRMZM2G015735	bnl12.30a
GRMZM2G015784	pco108516
GRMZM2G015861	arp7
GRMZM2G015869	pco143033
GRMZM2G015875	nch1
GRMZM2G015886	csld1
GRMZM2G015902	pco088994
GRMZM2G015908	pco107612
GRMZM2G015941	cnr1
GRMZM2G015955	zip7
GRMZM2G015976	sweet14b
GRMZM2G016020	mybr44
GRMZM2G016039	bhlh174
GRMZM2G016079	ereb169
GRMZM2G016084	srrp1
GRMZM2G016145	tcrr1
GRMZM2G016150	ohp1
GRMZM2G016184	tlc10
GRMZM2G016189	aldh9
GRMZM2G016210	umc1122
GRMZM2G016236	AY106674
GRMZM2G016241	bz2
GRMZM2G016323	umc1170
GRMZM2G016370	glk5
GRMZM2G016434	ereb129
GRMZM2G016439	hp1
GRMZM2G016477	umc1477
GRMZM2G016480	bnlg2238
GRMZM2G016551	tlc13
GRMZM2G016564	alf16
GRMZM2G016605	gid2
GRMZM2G016622	gpm930
GRMZM2G016637	thx5
GRMZM2G016649	thx12
GRMZM2G016660	pco100533b
GRMZM2G016671	tlk1
GRMZM2G016677	pspb1
GRMZM2G016749	pco077834a
GRMZM2G016756	bhlh60
GRMZM2G016802	Zm00001d011972
GRMZM2G016817	alf5
GRMZM2G016827	umc2711
GRMZM2G016858	xlg2
GRMZM2G016875	pco144592b
GRMZM2G016890	glu1
GRMZM2G016939	pzb01111
GRMZM2G016958	Zm00001d019311
GRMZM2G017016	pco069223b
GRMZM2G017077	im30p1
GRMZM2G017080	si945020e03
GRMZM2G017081	cyc9
GRMZM2G017087	kn1
GRMZM2G017089	AY106137
GRMZM2G017110	umc2236
GRMZM2G017142	alf9
GRMZM2G017170	umc2231
GRMZM2G017187	abi17
GRMZM2G017193	yuc8
GRMZM2G017257	pco131850
GRMZM2G017268	myb63
GRMZM2G017269	cl65062_1a
GRMZM2G017305	clt1
GRMZM2G017319	lbd11
GRMZM2G017349	bhlh125
GRMZM2G017351	gpm863
GRMZM2G017355	mterf18
GRMZM2G017382	si496011d04
GRMZM2G017404	TIDP2945
GRMZM2G017419	gpm605
GRMZM2G017429	mterf19
GRMZM2G017470	dof27
GRMZM2G017520	myb128
GRMZM2G017550	gpx7
GRMZM2G017555	pme14
GRMZM2G017557	rtp1
GRMZM2G017578	IDP324
GRMZM2G017586	bhlh172
GRMZM2G017606	srs3
GRMZM2G017616	lox9
GRMZM2G017624	pco133134
GRMZM2G017629	bnlg2057
GRMZM2G017636	mmp4
GRMZM2G017654	pco067729a
GRMZM2G017670	TIDP2891
GRMZM2G017671	pco101093b
GRMZM2G017792	mpk3
GRMZM2G017804	cl62390_1
GRMZM2G017805	crup1
GRMZM2G017831	tfIIB1
GRMZM2G017835	AY110151
GRMZM2G017845	limtf11
GRMZM2G017882	platz8
GRMZM2G017923	AY110182
GRMZM2G017933	pco085021
GRMZM2G017991	umc2111
GRMZM2G018006	acs3
GRMZM2G018020	cl6482_1b
GRMZM2G018027	umc2221
GRMZM2G018046	ipt9
GRMZM2G018070	xer1
GRMZM2G018080	rplp1
GRMZM2G018138	ereb88
GRMZM2G018148	ysl8
GRMZM2G018177	tpi3
GRMZM2G018217	pco102374
GRMZM2G018223	IDP267
GRMZM2G018241	cesa9
GRMZM2G018254	gras48
GRMZM2G018336	abi13
GRMZM2G018372	cl7520_2b
GRMZM2G018375	thi1
GRMZM2G018398	ereb14
GRMZM2G018414	grftf4
GRMZM2G018416	gpx10
GRMZM2G018417	ommp1
GRMZM2G018436	nactf126
GRMZM2G018441	umc2003
GRMZM2G018447	uce6
GRMZM2G018472	bhlh26
GRMZM2G018485	abi2
GRMZM2G018487	wrky107
GRMZM2G018508	TIDP2663
GRMZM2G018553	nactf6
GRMZM2G018573	atg18e
GRMZM2G018579	cl3927_1a
GRMZM2G018589	mads41
GRMZM2G018595	pco116834
GRMZM2G018612	cyp23
GRMZM2G018619	ras11D1
GRMZM2G018627	lhcb9
GRMZM2G018689	cl38702_1
GRMZM2G018692	incw6
GRMZM2G018695	mmp180
GRMZM2G018706	mgt10
GRMZM2G018716	incw7
GRMZM2G018721	wrky85
GRMZM2G018728	pki1
GRMZM2G018757	ppr231
GRMZM2G018760	umc2785
GRMZM2G018771	umc2541
GRMZM2G018786	pco079415b
GRMZM2G018793	AY111333
GRMZM2G018820	gpx1
GRMZM2G018837	cbp2
GRMZM2G018876	dbb1
GRMZM2G018885	umc2196
GRMZM2G018941	nad1
GRMZM2G018950	cl28462_1
GRMZM2G018951	mmc0312a
GRMZM2G018971	TIDP3080
GRMZM2G018984	ereb180
GRMZM2G019029	pld6
GRMZM2G019060	gras85
GRMZM2G019084	pco089076
GRMZM2G019090	gst18
GRMZM2G019106	bzip71
GRMZM2G019119	ras11E2
GRMZM2G019121	dts1
GRMZM2G019166	cl4198_1
GRMZM2G019177	cl19799_1
GRMZM2G019183	trps13
GRMZM2G019200	IDP1417
GRMZM2G019225	umc85a
GRMZM2G019251	pco131625
GRMZM2G019260	pmk1
GRMZM2G019267	AY110019
GRMZM2G019284	arm4
GRMZM2G019325	rps11
GRMZM2G019335	dbb4
GRMZM2G019353	smr4
GRMZM2G019373	cl32321_1
GRMZM2G019386	IDP624
GRMZM2G019404	mha2
GRMZM2G019411	pme26
GRMZM2G019434	mkkk51
GRMZM2G019443	ereb82
GRMZM2G019446	bzip41
GRMZM2G019468	pco142662
GRMZM2G019515	yuc6
GRMZM2G019538	dek40
GRMZM2G019553	cl61186_-1
GRMZM2G019562	dgk4
GRMZM2G019567	bnlg1484
GRMZM2G019586	csu193
GRMZM2G019673	Zm00001d030471
GRMZM2G019686	cl18204_1
GRMZM2G019695	IDP1619
GRMZM2G019799	ao3
GRMZM2G019806	bhlh137
GRMZM2G019807	cl25234_-2a
GRMZM2G019812	IDP2428
GRMZM2G019819	prh10
GRMZM2G019838	ak2
GRMZM2G019866	umc1491
GRMZM2G019907	obf3
GRMZM2G019916	umc254
GRMZM2G019919	rws1
GRMZM2G019956	abi18
GRMZM2G019958	pco101707b
GRMZM2G019986	bnlg2190
GRMZM2G019993	pebp21
GRMZM2G019999	vpp8
GRMZM2G020002	pco084866
GRMZM2G020016	ereb42
GRMZM2G020054	ereb54
GRMZM2G020081	toc1
GRMZM2G020091	pco100488
GRMZM2G020146	IDP781
GRMZM2G020148	tlc14
GRMZM2G020150	ereb196
GRMZM2G020187	rgd1
GRMZM2G020216	mpk2
GRMZM2G020254	wrky33
GRMZM2G020305	cadtfr13
GRMZM2G020320	gpat10
GRMZM2G020366	pzb01112
GRMZM2G020409	pza03409
GRMZM2G020418	pco138572
GRMZM2G020423	cl20570_1
GRMZM2G020468	umc2558
GRMZM2G020544	bnlg1651
GRMZM2G020548	bnlg1014
GRMZM2G020574	gpm895
GRMZM2G020580	nbcs17
GRMZM2G020631	Zm00001d031666
GRMZM2G020653	cl20232_1
GRMZM2G020661	ras11C3
GRMZM2G020721	cl33992_1
GRMZM2G020766	hak7
GRMZM2G020772	myb81
GRMZM2G020799	bzip13
GRMZM2G020801	aco1
GRMZM2G020805	tcptf43
GRMZM2G020859	kch2
GRMZM2G020928	c3h53
GRMZM2G020938	gpm55
GRMZM2G020943	pco086600
GRMZM2G021044	sdg104
GRMZM2G021051	ga20ox2
GRMZM2G021069	mcm6
GRMZM2G021095	lbd4
GRMZM2G021110	pco081178a
GRMZM2G021170	pco134375
GRMZM2G021194	osca2
GRMZM2G021223	asrp2
GRMZM2G021276	ms23
GRMZM2G021299	upl9
GRMZM2G021319	dek37
GRMZM2G021331	csu849(atpb)
GRMZM2G021339	hb115
GRMZM2G021369	ereb136
GRMZM2G021406	umc1296
GRMZM2G021436	cyp7
GRMZM2G021560	pebp25
GRMZM2G021573	ereb161
GRMZM2G021589	tlc7
GRMZM2G021605	AY109534
GRMZM2G021610	umc1126
GRMZM2G021614	pebp9
GRMZM2G021617	oec2
GRMZM2G021621	expb2
GRMZM2G021635	pco119647
GRMZM2G021642	IDP2400
GRMZM2G021687	psa2
GRMZM2G021694	GRMZM2G021694
GRMZM2G021704	cl17080_1
GRMZM2G021706	sweet13b
GRMZM2G021725	hak19
GRMZM2G021742	IDP2400
GRMZM2G021777	col3
GRMZM2G021781	AY108136
GRMZM2G021784	umc2309
GRMZM2G021786	sk1
GRMZM2G021790	ereb146
GRMZM2G021794	GRMZM2G021794
GRMZM2G021802	si683029c11
GRMZM2G021816	cl19870_1a
GRMZM2G021831	thx15
GRMZM2G021834	umc1259
GRMZM2G021846	cl46_1
GRMZM2G021864	pco099889b
GRMZM2G021889	umc1808
GRMZM2G021912	cl32627_1e
GRMZM2G022014	IDP84
GRMZM2G022019	eif7
GRMZM2G022054	umc2292
GRMZM2G022065	cl49722_1
GRMZM2G022088	pco137802
GRMZM2G022095	PCO115023
GRMZM2G022120	cl24641_1
GRMZM2G022130	magi108573
GRMZM2G022159	pco085018
GRMZM2G022162	ca5p12
GRMZM2G022180	clx2
GRMZM2G022192	ami4
GRMZM2G022252	pco071947b
GRMZM2G022255	IDP2407
GRMZM2G022269	tufm1
GRMZM2G022308	TIDP3000
GRMZM2G022318	umc1319
GRMZM2G022347	IDP496
GRMZM2G022359	ereb163
GRMZM2G022365	mbd106
GRMZM2G022398	mmp41
GRMZM2G022442	xt10
GRMZM2G022453	umc62
GRMZM2G022489	cg1
GRMZM2G022499	mybr103
GRMZM2G022558	fae2
GRMZM2G022606	traf7
GRMZM2G022625	TIDP3004
GRMZM2G022642	si486073c04
GRMZM2G022679	ga2ox3
GRMZM2G022686	myb154
GRMZM2G022711	AY109699
GRMZM2G022726	umc2730
GRMZM2G022768	bnlg1863
GRMZM2G022777	gpm464
GRMZM2G022782	invan9
GRMZM2G022820	umc2730
GRMZM2G022837	ics1
GRMZM2G022859	uce5
GRMZM2G022915	kch1
GRMZM2G022931	pco145505
GRMZM2G022945	phd6
GRMZM2G023020	phm3457
GRMZM2G023037	si660042c08
GRMZM2G023051	pco088589
GRMZM2G023071	emp12
GRMZM2G023073	stm1
GRMZM2G023081	cnr9
GRMZM2G023119	thx7
GRMZM2G023133	bnlg1740
GRMZM2G023163	pco095943(114)
GRMZM2G023194	isp1
GRMZM2G023242	magi62468
GRMZM2G023254	IDP723
GRMZM2G023257	mterf11
GRMZM2G023285	ofp18
GRMZM2G023289	pgm1
GRMZM2G023291	hb124
GRMZM2G023325	Bx12
GRMZM2G023346	umc1029
GRMZM2G023347	GRMZM2G023347
GRMZM2G023372	msi1
GRMZM2G023392	AY109506
GRMZM2G023422	pol1
GRMZM2G023528	smk2
GRMZM2G023557	mybr104
GRMZM2G023575	IDP343
GRMZM2G023585	umc1252
GRMZM2G023591	cp33c
GRMZM2G023652	pco073973a
GRMZM2G023667	smh3
GRMZM2G023708	ereb125
GRMZM2G023755	pco117356b
GRMZM2G023760	sudh8
GRMZM2G023813	arftf31
GRMZM2G023836	npi616a
GRMZM2G023858	vps1
GRMZM2G023872	scl1
GRMZM2G023921	vq13
GRMZM2G023946	pco129583a
GRMZM2G023952	cyp24
GRMZM2G023988	cchh3
GRMZM2G023999	ppr101
GRMZM2G024051	pco110965
GRMZM2G024054	mybr99
GRMZM2G024104	gln2
GRMZM2G024119	si496036g01
GRMZM2G024131	iaglu1
GRMZM2G024145	pco062914
GRMZM2G024150	psad1
GRMZM2G024196	ysl13
GRMZM2G024231	cl11011_1
GRMZM2G024245	umc54
GRMZM2G024247	hmg4
GRMZM2G024264	psei5
GRMZM2G024267	IDP603
GRMZM2G024293	si618011b01
GRMZM2G024303	pco065682a
GRMZM2G024315	pco114043
GRMZM2G024444	si486074g10
GRMZM2G024451	pco121903a
GRMZM2G024466	dcl4
GRMZM2G024468	myb83
GRMZM2G024476	cko4b
GRMZM2G024482	si618073h11
GRMZM2G024495	pco087467a
GRMZM2G024499	umc2749
GRMZM2G024530	ptf1
GRMZM2G024550	mterf17
GRMZM2G024576	pco093770(474)
GRMZM2G024612	GRMZM2G024612
GRMZM2G024615	bnlg1792
GRMZM2G024655	c3h42
GRMZM2G024657	gpm707
GRMZM2G024668	pza03531
GRMZM2G024680	zim21
GRMZM2G024690	rhcp1
GRMZM2G024718	bnl5.09a
GRMZM2G024739	cry1
GRMZM2G024775	cdo412b
GRMZM2G024799	cl7796_1
GRMZM2G024823	uaz282
GRMZM2G024838	ufg74
GRMZM2G024851	bzip129
GRMZM2G024858	cl3398_1
GRMZM2G024865	pco112007(563)
GRMZM2G024871	ereb74
GRMZM2G024882	pco124991
GRMZM2G024887	limtf14
GRMZM2G024898	wrky70
GRMZM2G024933	umc131
GRMZM2G024948	abi16
GRMZM2G024973	d9
GRMZM2G024976	arid6
GRMZM2G024993	wx1
GRMZM2G025002	gata1
GRMZM2G025014	c3h4
GRMZM2G025054	tgz15a
GRMZM2G025062	ereb200
GRMZM2G025072	umc1986
GRMZM2G025095	mbd111
GRMZM2G025105	pgip3
GRMZM2G025175	pco138410b
GRMZM2G025182	pme20
GRMZM2G025190	gst42
GRMZM2G025205	grp4
GRMZM2G025215	cl31807_1
GRMZM2G025222	spi1
GRMZM2G025231	cesa7
GRMZM2G025236	umc1264
GRMZM2G025242	laz1
GRMZM2G025248	aprl9
GRMZM2G025356	si946076e12
GRMZM2G025387	cdpk17
GRMZM2G025409	ppr5
GRMZM2G025429	ipt8
GRMZM2G025441	px16
GRMZM2G025459	snrkb1
GRMZM2G025488	bcd98a
GRMZM2G025528	TIDP3621
GRMZM2G025579	hk5
GRMZM2G025592	met2
GRMZM2G025598	cl27878_1
GRMZM2G025642	nactf33
GRMZM2G025646	GRMZM2G025646
GRMZM2G025685	hsftf27
GRMZM2G025703	phd43
GRMZM2G025742	pin5
GRMZM2G025758	lbd21
GRMZM2G025783	GRMZM2G025783
GRMZM2G025812	bzip60
GRMZM2G025832	pr1
GRMZM2G025855	IDP644
GRMZM2G025867	pco093706
GRMZM2G025882	pco076489
GRMZM2G025895	wrky79
GRMZM2G025924	sdg137
GRMZM2G025954	pco072881
GRMZM2G025977	pco075778b
GRMZM2G025989	lbd25
GRMZM2G025992	sod2
GRMZM2G026013	cl15744_1
GRMZM2G026015	umc1974
GRMZM2G026065	bcd926b
GRMZM2G026117	cf1
GRMZM2G026157	ca2p1
GRMZM2G026216	IDP486
GRMZM2G026218	mmp187
GRMZM2G026223	zag6
GRMZM2G026311	cl9441_1a
GRMZM2G026391	ysl3
GRMZM2G026417	gbptf18
GRMZM2G026442	pza02479
GRMZM2G026470	phi100175
GRMZM2G026523	ptr2
GRMZM2G026556	traf8
GRMZM2G026639	gpm923
GRMZM2G026643	ocl1
GRMZM2G026656	si660070b03
GRMZM2G026703	glb2
GRMZM2G026742	hsftf9
GRMZM2G026780	umc1290
GRMZM2G026793	sacd5
GRMZM2G026807	rpe1
GRMZM2G026833	glk1
GRMZM2G026855	cl32876_1
GRMZM2G026892	PCO135705
GRMZM2G026926	ereb154
GRMZM2G026927	ofp28
GRMZM2G026930	a1
GRMZM2G026980	xet1
GRMZM2G027041	lim333
GRMZM2G027059	lw1
GRMZM2G027068	bhlh48
GRMZM2G027075	jmj4
GRMZM2G027098	tip2a
GRMZM2G027105	pco074406
GRMZM2G027131	cl21045_1
GRMZM2G027166	cl39673_1a
GRMZM2G027193	umc2386
GRMZM2G027217	npi433
GRMZM2G027219	vde1
GRMZM2G027232	GRMZM2G027232
GRMZM2G027241	mzetc34
GRMZM2G027253	abi37
GRMZM2G027282	AY105910
GRMZM2G027302	Zm00001d051966
GRMZM2G027309	nactf99
GRMZM2G027311	pco071010
GRMZM2G027331	TIDP3737
GRMZM2G027351	cdpk18
GRMZM2G027378	uce9
GRMZM2G027385	Zm00001d046357
GRMZM2G027392	IDP694
GRMZM2G027478	csu351
GRMZM2G027522	mac1
GRMZM2G027535	bsdtf8
GRMZM2G027563	bhlh87
GRMZM2G027608	nbcs14
GRMZM2G027627	AY112355
GRMZM2G027663	thic1
GRMZM2G027673	sacd6
GRMZM2G027688	mab13
GRMZM2G027697	myb86
GRMZM2G027723	cesa2
GRMZM2G027728	rpl30
GRMZM2G027821	nod1
GRMZM2G027835	dps1
GRMZM2G027851	nhx5
GRMZM2G027857	atg6b
GRMZM2G027914	mybr37
GRMZM2G027955	agp2
GRMZM2G027972	wrky87
GRMZM2G027976	bzip53
GRMZM2G027995	eif4a
GRMZM2G028004	cl14903_1
GRMZM2G028037	cl54662_1
GRMZM2G028039	gras45
GRMZM2G028041	rs1
GRMZM2G028054	myb74
GRMZM2G028086	cdpk19
GRMZM2G028089	si605023c06b
GRMZM2G028104	umc1739
GRMZM2G028134	si614077a01
GRMZM2G028151	ereb184
GRMZM2G028190	cl12769_-1
GRMZM2G028216	rpl29
GRMZM2G028247	pco122203
GRMZM2G028302	IDP1986
GRMZM2G028325	nip2a
GRMZM2G028366	GRMZM2G028366
GRMZM2G028369	cmu3
GRMZM2G028386	ereb137
GRMZM2G028393	sci1
GRMZM2G028432	vpp4
GRMZM2G028438	gras76
GRMZM2G028500	TIDP9256
GRMZM2G028521	citt1
GRMZM2G028535	pco085448
GRMZM2G028556	gst7
GRMZM2G028568	GRMZM2G028568
GRMZM2G028594	dbb11
GRMZM2G028604	hlt1
GRMZM2G028608	gras51
GRMZM2G028622	hb122
GRMZM2G028637	si687042f02
GRMZM2G028700	bsu1
GRMZM2G028726	bnlg1556
GRMZM2G028736	amt2
GRMZM2G028758	cl9685_1c
GRMZM2G028794	abi43
GRMZM2G028821	gst39
GRMZM2G028900	TIDP3496
GRMZM2G028929	cop2
GRMZM2G028969	ereb185
GRMZM2G028980	arftf16
GRMZM2G028982	ofp34
GRMZM2G028986	rz390a(cyb5)
GRMZM2G029029	IDP89
GRMZM2G029048	pal9
GRMZM2G029058	pco071744
GRMZM2G029077	pco149758
GRMZM2G029153	pco127614a
GRMZM2G029204	aco9
GRMZM2G029223	magi20317
GRMZM2G029242	cdo244a(crp)
GRMZM2G029282	wrky88
GRMZM2G029292	wrky35
GRMZM2G029307	IDP475
GRMZM2G029323	ereb17
GRMZM2G029356	pco081347
GRMZM2G029370	pco125063
GRMZM2G029396	sqsh1
GRMZM2G029486	ras11A1
GRMZM2G029530	pti3
GRMZM2G029543	pco095766
GRMZM2G029546	umc2170
GRMZM2G029559	rz476b
GRMZM2G029573	pco072185
GRMZM2G029623	xer4
GRMZM2G029731	ipp1
GRMZM2G029824	pmp1
GRMZM2G029845	nrh1
GRMZM2G029850	mybr52
GRMZM2G029856	rz682
GRMZM2G029896	pld4
GRMZM2G029912	cer2
GRMZM2G029922	umc1687
GRMZM2G029933	mterf4
GRMZM2G029951	hma7
GRMZM2G029979	bzip28
GRMZM2G030036	nas2
GRMZM2G030072	cl4569_1a
GRMZM2G030123	umc1413
GRMZM2G030125	umc1142
GRMZM2G030148	smk1
GRMZM2G030167	GRMZM2G030167
GRMZM2G030241	cl63689_1
GRMZM2G030272	wrky32
GRMZM2G030275	pco117343
GRMZM2G030280	bzip72
GRMZM2G030284	pco098137
GRMZM2G030293	rps28
GRMZM2G030312	pco137067b
GRMZM2G030325	nactf54
GRMZM2G030403	mybr9
GRMZM2G030422	tpl2
GRMZM2G030436	hct4
GRMZM2G030458	gbptf9
GRMZM2G030463	pco130460
GRMZM2G030465	iaa24
GRMZM2G030523	pcna1
GRMZM2G030529	pza00752
GRMZM2G030571	algt1
GRMZM2G030583	tps26
GRMZM2G030606	csu173
GRMZM2G030628	hcp101a
GRMZM2G030673	cdpk20
GRMZM2G030710	arftf24
GRMZM2G030717	psei10
GRMZM2G030731	magi89825
GRMZM2G030744	bhlh168
GRMZM2G030762	bhlh55
GRMZM2G030784	tpi4
GRMZM2G030839	AY109550
GRMZM2G030877	bzip79
GRMZM2G031001	nactf11
GRMZM2G031004	xyn10
GRMZM2G031028	gpm119
GRMZM2G031043	cl40463_1a
GRMZM2G031062	hagtf7
GRMZM2G031107	gpm742
GRMZM2G031120	nactf106
GRMZM2G031200	nactf87
GRMZM2G031261	psk4
GRMZM2G031308	dhn6
GRMZM2G031311	sm1
GRMZM2G031317	IDP1448
GRMZM2G031323	myb105
GRMZM2G031326	magi59348
GRMZM2G031331	mlo3
GRMZM2G031360	cl554_3(180)
GRMZM2G031370	GRMZM2G031370
GRMZM2G031398	nlp3
GRMZM2G031432	ga2ox13
GRMZM2G031447	umc1794
GRMZM2G031461	nudix1
GRMZM2G031493	thx30
GRMZM2G031496	nbp35
GRMZM2G031568	AY110297
GRMZM2G031584	pza00827
GRMZM2G031607	pco119358
GRMZM2G031615	iaa14
GRMZM2G031724	ga2ox10
GRMZM2G031733	si605069d12
GRMZM2G031780	si946069e08
GRMZM2G031827	c3h36
GRMZM2G031837	IDP504
GRMZM2G031846	cl30924_1
GRMZM2G031850	si683017c09
GRMZM2G031870	IDP2395
GRMZM2G031882	wox9b
GRMZM2G031893	umc1128
GRMZM2G031904	umc1422
GRMZM2G031905	tcptf32
GRMZM2G031952	AY109938
GRMZM2G031963	wrky59
GRMZM2G031981	gpm7
GRMZM2G031983	gata15
GRMZM2G032003	ugp2
GRMZM2G032047	AY110632
GRMZM2G032132	crn1
GRMZM2G032145	burp3
GRMZM2G032180	mybr4
GRMZM2G032190	umc1913
GRMZM2G032198	GRMZM2G032198
GRMZM2G032219	mlo1
GRMZM2G032222	drg1
GRMZM2G032252	nfd110
GRMZM2G032258	pco075454
GRMZM2G032282	cpx2
GRMZM2G032315	arpp1a
GRMZM2G032336	camta2
GRMZM2G032339	mads4
GRMZM2G032350	si946037c04
GRMZM2G032351	phot2
GRMZM2G032376	pco095409
GRMZM2G032475	cl28127_1
GRMZM2G032478	ofp10
GRMZM2G032528	cl61745_1b
GRMZM2G032594	cl8313_1
GRMZM2G032619	bnl10.05
GRMZM2G032628	ae1
GRMZM2G032655	myb49
GRMZM2G032699	AY110576
GRMZM2G032711	nfc104a
GRMZM2G032821	si660076d07
GRMZM2G032856	gst24
GRMZM2G032896	umc1352a
GRMZM2G032905	mads63
GRMZM2G032944	IDP1643
GRMZM2G032947	pco137761c
GRMZM2G032977	pco102923
GRMZM2G033014	nactf28
GRMZM2G033029	TIDP3766
GRMZM2G033098	aos5
GRMZM2G033117	umc1416
GRMZM2G033135	smg1
GRMZM2G033138	hb28
GRMZM2G033199	pco110957
GRMZM2G033208	tk1
GRMZM2G033230	bzip108
GRMZM2G033283	cl66163_1
GRMZM2G033330	umc1607
GRMZM2G033350	sdg115
GRMZM2G033356	bhlh130
GRMZM2G033359	aas7
GRMZM2G033413	bzip100
GRMZM2G033478	IDP751
GRMZM2G033493	umc1251
GRMZM2G033519	lim432
GRMZM2G033526	pyk1
GRMZM2G033555	AY103770
GRMZM2G033570	eil3
GRMZM2G033612	cl53605_1
GRMZM2G033626	IDP428
GRMZM2G033630	cl33342_1
GRMZM2G033641	umc1462
GRMZM2G033644	drg11
GRMZM2G033656	ereb150
GRMZM2G033680	cbl7
GRMZM2G033694	sdg110b
GRMZM2G033767	gpat6
GRMZM2G033799	got5
GRMZM2G033828	rrb3
GRMZM2G033829	pdi4
GRMZM2G033867	npi457
GRMZM2G033885	psb29
GRMZM2G033962	GRMZM2G033962
GRMZM2G033985	prx112
GRMZM2G034013	pco067179
GRMZM2G034015	IDP375
GRMZM2G034043	ufg80
GRMZM2G034052	mpk16
GRMZM2G034061	mstr4
GRMZM2G034065	pco089911
GRMZM2G034083	cts5
GRMZM2G034096	cl5598_1a
GRMZM2G034110	mybst1
GRMZM2G034113	hb126
GRMZM2G034152	pao1
GRMZM2G034157	hsp18c
GRMZM2G034182	csu134b(thf)
GRMZM2G034217	mterf3
GRMZM2G034278	csu134b(thf)
GRMZM2G034288	sdg136
GRMZM2G034302	sut1
GRMZM2G034326	pco144871
GRMZM2G034342	cl19671_1
GRMZM2G034360	hct10
GRMZM2G034362	myo2
GRMZM2G034372	IDP194
GRMZM2G034421	wrky89
GRMZM2G034453	si945034e12a
GRMZM2G034495	hagtf34
GRMZM2G034551	zip6
GRMZM2G034563	glk50
GRMZM2G034572	pan2
GRMZM2G034573	cl24558_1b
GRMZM2G034575	gpm310
GRMZM2G034598	TIDP3459
GRMZM2G034622	upl5
GRMZM2G034638	tcptf20
GRMZM2G034647	cyc1
GRMZM2G034668	cl16535_1a
GRMZM2G034697	Zm00001d051063
GRMZM2G034724	pco117817
GRMZM2G034804	pco131956(317)
GRMZM2G034810	Zm00001d043011
GRMZM2G034828	krp13
GRMZM2G034840	arftf4
GRMZM2G034846	pmei42
GRMZM2G034855	umc1504
GRMZM2G034868	farl5
GRMZM2G034876	grftf6
GRMZM2G034882	mlkp2
GRMZM2G034896	IDP491
GRMZM2G034924	pco086652
GRMZM2G034943	IDP427
GRMZM2G034956	nas10
GRMZM2G034975	si683005a07
GRMZM2G035045	GRMZM2G035045
GRMZM2G035092	mads53
GRMZM2G035134	TIDP3606
GRMZM2G035153	cl37809_1
GRMZM2G035156	bhlh74
GRMZM2G035202	cl20712_1(629)
GRMZM2G035213	vte4
GRMZM2G035223	cl37809_1
GRMZM2G035268	gpn1
GRMZM2G035298	AY109873
GRMZM2G035305	IDP876a
GRMZM2G035338	pco084702
GRMZM2G035341	GRMZM2G035341
GRMZM2G035356	mmp137
GRMZM2G035370	glk16
GRMZM2G035405	arftf18
GRMZM2G035445	laz5
GRMZM2G035451	AY109809
GRMZM2G035461	atg9
GRMZM2G035465	iaa38
GRMZM2G035490	pmei41
GRMZM2G035502	dhar3
GRMZM2G035520	mha12
GRMZM2G035526	gpm882
GRMZM2G035531	vq54
GRMZM2G035584	hct6
GRMZM2G035688	abph1
GRMZM2G035701	abi19
GRMZM2G035708	cl61634_1
GRMZM2G035709	si605036g08a
GRMZM2G035785	pco106173a
GRMZM2G035809	snrkII1
GRMZM2G035820	rnc1
GRMZM2G035843	cdpk6
GRMZM2G035849	pfa4
GRMZM2G035890	GRMZM2G035890
GRMZM2G035922	ppi2
GRMZM2G035944	tcptf7
GRMZM2G035985	npi113b
GRMZM2G035994	pao5
GRMZM2G035996	pco107502a
GRMZM2G036007	si946019d11
GRMZM2G036050	IDP798
GRMZM2G036092	bhlh30
GRMZM2G036099	cl37306_1
GRMZM2G036131	aco7
GRMZM2G036134	cl16097_1
GRMZM2G036169	lug3
GRMZM2G036203	csu5a
GRMZM2G036217	msh1
GRMZM2G036288	zim14
GRMZM2G036290	dxr2
GRMZM2G036297	lg1
GRMZM2G036340	d1
GRMZM2G036349	zim6
GRMZM2G036351	zim4
GRMZM2G036448	mmp64
GRMZM2G036455	pcr2
GRMZM2G036464	gln5
GRMZM2G036543	csu323
GRMZM2G036554	bhlh153
GRMZM2G036564	tm20
GRMZM2G036609	fgs1
GRMZM2G036703	wrky115
GRMZM2G036832	gex2
GRMZM2G036837	c3h28
GRMZM2G036861	pco087106a
GRMZM2G036908	umc2311
GRMZM2G036916	hak23
GRMZM2G036918	gpm759a
GRMZM2G036921	pco082226
GRMZM2G036966	gbptf15
GRMZM2G036980	vq43
GRMZM2G037043	ofp30
GRMZM2G037048	Zm00001d038306
GRMZM2G037094	pco142081
GRMZM2G037104	pls1
GRMZM2G037128	thx21
GRMZM2G037134	pco145718b
GRMZM2G037140	adf4
GRMZM2G037152	elo1
GRMZM2G037185	TIDP2717
GRMZM2G037189	pco105606b
GRMZM2G037200	c3h34
GRMZM2G037204	TIDP3363
GRMZM2G037226	AY110016
GRMZM2G037255	pco069442
GRMZM2G037265	aga3
GRMZM2G037286	gras56
GRMZM2G037308	umc2300
GRMZM2G037327	cl46210_1
GRMZM2G037368	rum1
GRMZM2G037378	umc1367
GRMZM2G037386	si606055f01
GRMZM2G037411	pme41
GRMZM2G037413	cesa13
GRMZM2G037444	bnlg2259
GRMZM2G037472	umc1669
GRMZM2G037485	csu147
GRMZM2G037493	thx9
GRMZM2G037614	pco118301
GRMZM2G037624	IDP1681
GRMZM2G037630	ca2p3
GRMZM2G037650	myb167
GRMZM2G037683	lug5
GRMZM2G037725	cl9336_1
GRMZM2G037743	si605019e07
GRMZM2G037792	gras79
GRMZM2G037823	thx42
GRMZM2G037865	umc1482
GRMZM2G037875	phi251315
GRMZM2G037882	pco118997
GRMZM2G037910	bzip46
GRMZM2G037923	pco139663a
GRMZM2G037926	cki2
GRMZM2G038001	gpx8
GRMZM2G038013	hcf60
GRMZM2G038015	bzip24
GRMZM2G038032	rack1
GRMZM2G038046	umc42a
GRMZM2G038050	phd8
GRMZM2G038066	alf3
GRMZM2G038073	nactf13
GRMZM2G038153	tps8
GRMZM2G038158	wrky8
GRMZM2G038217	IDP437
GRMZM2G038252	hb88
GRMZM2G038281	IDP73
GRMZM2G038284	umc1350
GRMZM2G038301	ccs1
GRMZM2G038303	ca2p15
GRMZM2G038313	pco126859b
GRMZM2G038356	sar1
GRMZM2G038365	ris2
GRMZM2G038394	gpm256
GRMZM2G038401	ndl1
GRMZM2G038479	bhlh8
GRMZM2G038485	IDP847
GRMZM2G038487	pco079065e
GRMZM2G038494	cl35478_1b
GRMZM2G038519	lhca1
GRMZM2G038636	ccp2
GRMZM2G038691	umc1857
GRMZM2G038722	myb13
GRMZM2G038783	col13
GRMZM2G038821	pdc2
GRMZM2G038833	TIDP2957
GRMZM2G038851	uce18
GRMZM2G038855	umc1601
GRMZM2G038878	mads50
GRMZM2G038964	pza00978
GRMZM2G038988	cl9314_1
GRMZM2G039029	si605080a10a
GRMZM2G039074	glk23
GRMZM2G039089	cl31997_1
GRMZM2G039112	ereb168
GRMZM2G039113	tan1
GRMZM2G039155	emp2
GRMZM2G039166	hmt4
GRMZM2G039186	osca9
GRMZM2G039280	cl4529_1
GRMZM2G039312	ofp5
GRMZM2G039365	sweet1a
GRMZM2G039373	GRMZM2G039373
GRMZM2G039385	cl22071_1
GRMZM2G039396	prpo1
GRMZM2G039454	cesa3
GRMZM2G039455	ago1c
GRMZM2G039538	sbt2
GRMZM2G039586	gata29
GRMZM2G039592	rtl4
GRMZM2G039639	pco103560
GRMZM2G039723	gpa2
GRMZM2G039725	umc1941
GRMZM2G039828	bzip6
GRMZM2G039867	tru1
GRMZM2G039870	ereb112
GRMZM2G039880	IDP839
GRMZM2G039889	c3h46
GRMZM2G039895	phd1
GRMZM2G039900	pco097124a
GRMZM2G039942	ane1
GRMZM2G039961	umc2536
GRMZM2G040017	cax2
GRMZM2G040052	drg3
GRMZM2G040079	brd103
GRMZM2G040095	lox6
GRMZM2G040102	IDP2448a
GRMZM2G040121	pco064372
GRMZM2G040131	mbd101
GRMZM2G040164	pza00111
GRMZM2G040230	cl3469_11a
GRMZM2G040298	wrky29
GRMZM2G040311	pmei40
GRMZM2G040326	pco091746
GRMZM2G040349	ca2p4
GRMZM2G040364	upb1
GRMZM2G040369	cl2727_2a
GRMZM2G040397	gpm461b
GRMZM2G040401	pco091249
GRMZM2G040441	mlo2
GRMZM2G040477	rack2
GRMZM2G040481	eil8
GRMZM2G040493	TIDP3276
GRMZM2G040627	udg1
GRMZM2G040634	cl1882_7
GRMZM2G040638	pox2
GRMZM2G040664	ereb86
GRMZM2G040673	ofp41
GRMZM2G040689	ltp2
GRMZM2G040736	crr1
GRMZM2G040762	dcl101
GRMZM2G040843	invan8
GRMZM2G040871	phi109188a
GRMZM2G040876	AY109829
GRMZM2G040878	pco102443
GRMZM2G040911	pin11
GRMZM2G040924	myb89
GRMZM2G040933	dct1
GRMZM2G040947	GRMZM2G040947
GRMZM2G040954	ufg77
GRMZM2G040968	magi29945
GRMZM2G040970	phi233376
GRMZM2G041015	pco064378
GRMZM2G041022	arpg1
GRMZM2G041048	cl3759_1c
GRMZM2G041050	nbcs1
GRMZM2G041065	uaz280c(ppp)
GRMZM2G041068	TIDP2910
GRMZM2G041127	hb54
GRMZM2G041159	pco070684
GRMZM2G041223	grftf8
GRMZM2G041231	emp7
GRMZM2G041235	pco066808
GRMZM2G041258	umc1105
GRMZM2G041308	bnl13.05a
GRMZM2G041310	umc1101
GRMZM2G041328	umc1671
GRMZM2G041415	myb8
GRMZM2G041462	hb128
GRMZM2G041463	GRMZM2G041463
GRMZM2G041595	pht5
GRMZM2G041633	cl9715_1b
GRMZM2G041668	nut1
GRMZM2G041685	gst32
[truncated: 16,060 more rows]

## Sheet: Table 4. SLB
Supplementary Table 4 - Example expression Log2 fold-change (FC) increase 24 hours after pathogen inoculation
Citation:	Ding, Yezhang, Katherine M. Murphy, Elly Poretsky, Sibongile Mafu, Bing Yang, Si Nian Char, Shawn A. Christensen, Evan Saldivar, Mengxi Wu, Qiang Wang, Lexiang Ji, Robert J. Schmitz, Karl A. Kremling, Edward S. Buckler, Zhouxin Shen, Steven P. Briggs, Jörg Bohlmann, Andrew Sher, Gabriel Castro-Falcon, Chambers C. Hughes, Alisa Huffaker, Philipp Zerbe, and Eric A. Schmelz. 2019. “Multiple Genes Re…
DOI:	doi: 10.1038/s41477-019-0509-6
Link:	https://www.nature.com/articles/s41477-019-0509-6
File:	Supplementary Table 1
Notes:	(1) All RefGen_v4 gene IDs were translated to RefGen_v3 gene IDs (https://maizegdb.org/gene_center/gene)
	(2) Only genes with P-value<0.05 and Log2 FC >1 or Log2 FC <-1 were included
genes	SLB
GRMZM2G051943	13.812
GRMZM2G119150	12.057
GRMZM2G078667	12.006
GRMZM2G320786	12
GRMZM2G099092	11.998
GRMZM2G093092	11.707
GRMZM2G465226	11.699
GRMZM2G021277	11.598
GRMZM2G170734	11.465
GRMZM2G044481	11.396
GRMZM2G009045	11.375
GRMZM2G130351	11.289
GRMZM2G415529	10.987
GRMZM2G065585	10.935
GRMZM5G892675	10.796
GRMZM2G127087	10.751
GRMZM2G308422	10.75
GRMZM2G173192	10.737
GRMZM2G075283	10.6
GRMZM2G089506	10.548
GRMZM2G021388	10.459
GRMZM2G015933	10.457
GRMZM2G156877	10.415
GRMZM2G423331	10.355
GRMZM2G148014	10.349
GRMZM2G122654	10.254
AC205274.3_FG001	10.217
GRMZM2G169033	10.103
GRMZM2G156632	10.098
GRMZM2G465999	10.024
GRMZM2G114918	9.983
GRMZM2G125196	9.963
GRMZM2G311036	9.823
AC205413.4_FG001	9.744
GRMZM2G116520	9.698
GRMZM2G176798	9.684
GRMZM2G075315	9.682
GRMZM2G094375	9.554
GRMZM2G127418	9.459
GRMZM2G448710	9.431
GRMZM2G108207	9.398
GRMZM2G073929	9.362
GRMZM2G112488	9.354
GRMZM2G117971	9.276
GRMZM2G149714	9.271
GRMZM2G052571	9.265
GRMZM2G336824	9.258
AC197764.4_FG003	9.251
GRMZM2G076343	9.229
GRMZM2G154828	9.224
GRMZM2G004106	9.2
GRMZM2G016922	9.192
GRMZM2G028306	9.192
GRMZM2G176472	9.181
GRMZM2G039009	9.171
GRMZM2G074248	9.169
GRMZM2G102550	9.154
GRMZM2G106177	9.142
GRMZM2G005633	9.127
GRMZM2G175927	9.06
GRMZM2G092169	9.034
GRMZM2G074743	9.012
GRMZM2G436448	8.99
GRMZM2G111711	8.962
GRMZM2G358153	8.955
GRMZM2G161521	8.947
GRMZM2G093606	8.942
GRMZM2G084779	8.917
GRMZM2G093622	8.869
GRMZM2G093125	8.866
GRMZM2G145440	8.866
GRMZM2G123119	8.852
GRMZM2G108847	8.845
GRMZM2G429617	8.814
GRMZM2G106026	8.775
GRMZM2G113860	8.653
GRMZM2G092146	8.652
GRMZM2G160840	8.64
GRMZM2G049930	8.631
GRMZM2G170017	8.574
GRMZM2G481052	8.558
GRMZM2G340177	8.546
GRMZM2G030099	8.523
GRMZM2G023847	8.495
GRMZM2G314652	8.489
GRMZM5G874955	8.464
GRMZM2G065471	8.448
GRMZM2G106560	8.389
GRMZM2G150474	8.377
GRMZM2G169240	8.372
GRMZM2G162158	8.36
GRMZM2G364208	8.353
GRMZM2G176307	8.334
GRMZM2G387360	8.325
GRMZM2G070304	8.312
GRMZM2G421160	8.293
GRMZM2G071390	8.29
GRMZM2G102662	8.277
GRMZM2G181135	8.244
GRMZM2G181227	8.226
GRMZM2G122280	8.222
GRMZM2G449094	8.177
GRMZM2G142390	8.155
GRMZM2G028677	8.13
GRMZM2G466563	8.123
GRMZM2G030772	8.066
GRMZM2G129114	8.048
GRMZM2G080839	8.04
GRMZM2G161310	8.032
GRMZM2G333274	8.023
GRMZM2G036365	8.004
GRMZM2G112524	7.993
AC205413.4_FG002	7.971
AC214771.3_FG003	7.965
GRMZM2G169261	7.903
GRMZM2G147774	7.895
GRMZM2G154870	7.875
GRMZM2G044537	7.87
GRMZM2G166616	7.862
GRMZM2G057116	7.85
GRMZM2G034024	7.82
GRMZM2G118809	7.786
GRMZM2G103881	7.742
GRMZM2G168431	7.698
GRMZM2G101405	7.678
GRMZM2G399921	7.677
AC197758.3_FG004	7.661
GRMZM2G132550	7.642
GRMZM2G002614	7.633
GRMZM2G066101	7.605
GRMZM2G039639	7.565
GRMZM2G007481	7.557
GRMZM2G457287	7.544
GRMZM2G397281	7.542
GRMZM2G333582	7.535
GRMZM2G125448	7.528
GRMZM2G127328	7.508
GRMZM2G051219	7.504
GRMZM2G095904	7.481
GRMZM2G082504	7.476
GRMZM2G146644	7.457
GRMZM5G872578	7.441
AC214360.3_FG001	7.435
GRMZM2G015654	7.427
GRMZM2G542272	7.399
GRMZM2G157298	7.369
GRMZM2G056469	7.367
GRMZM2G013448	7.357
GRMZM2G175076	7.349
GRMZM2G140231	7.349
GRMZM2G062333	7.345
GRMZM2G397755	7.331
GRMZM2G052288	7.33
GRMZM2G174449	7.317
GRMZM2G092474	7.303
GRMZM2G065205	7.297
GRMZM2G374309	7.291
GRMZM2G123107	7.284
GRMZM2G132212	7.267
GRMZM2G161827	7.266
GRMZM2G050234	7.26
GRMZM2G104829	7.248
GRMZM2G086430	7.234
GRMZM2G115451	7.229
GRMZM2G112538	7.222
GRMZM5G846916	7.204
GRMZM2G372068	7.196
GRMZM2G089698	7.18
GRMZM2G021069	7.164
GRMZM2G060210	7.155
GRMZM2G180324	7.142
GRMZM2G057093	7.127
GRMZM2G391312	7.111
GRMZM2G051921	7.109
GRMZM2G095280	7.096
GRMZM5G804618	7.089
GRMZM2G135387	7.073
GRMZM2G074611	7.067
GRMZM2G062396	7.058
GRMZM2G082943	7.054
GRMZM2G396951	7.052
GRMZM2G173195	7.048
GRMZM2G087186	7.043
GRMZM2G147245	7.042
GRMZM2G045809	7.036
GRMZM2G170016	7.034
GRMZM2G334336	7.015
GRMZM2G007289	7.007
GRMZM2G340654	6.997
GRMZM2G157364	6.994
GRMZM2G036759	6.991
GRMZM2G033359	6.99
GRMZM2G024686	6.968
GRMZM2G424519	6.964
GRMZM2G069176	6.94
GRMZM5G836353	6.924
GRMZM2G047404	6.907
GRMZM2G175480	6.895
GRMZM2G402631	6.894
GRMZM2G125032	6.877
GRMZM2G458659	6.874
GRMZM2G003506	6.873
GRMZM2G323943	6.86
GRMZM2G076394	6.858
GRMZM2G046583	6.833
GRMZM2G052825	6.833
GRMZM2G419777	6.833
GRMZM2G050768	6.83
GRMZM2G072965	6.811
GRMZM2G063917	6.791
GRMZM2G075594	6.79
GRMZM2G122198	6.779
GRMZM2G013726	6.773
GRMZM2G433184	6.745
GRMZM2G458095	6.744
GRMZM5G812326	6.734
GRMZM2G092718	6.704
GRMZM2G033799	6.699
GRMZM2G126079	6.692
GRMZM2G436455	6.689
GRMZM2G407825	6.68
GRMZM2G153871	6.658
GRMZM2G143669	6.654
GRMZM2G177883	6.648
GRMZM2G420988	6.643
GRMZM2G467934	6.643
GRMZM2G117942	6.641
GRMZM2G093554	6.639
GRMZM2G326335	6.632
GRMZM2G124815	6.63
GRMZM2G041959	6.625
GRMZM2G126749	6.624
GRMZM2G139894	6.597
GRMZM2G056231	6.594
GRMZM2G116902	6.592
GRMZM2G025190	6.591
GRMZM2G046331	6.584
GRMZM2G316033	6.576
GRMZM2G148400	6.564
GRMZM2G010702	6.56
GRMZM2G176430	6.558
GRMZM2G445958	6.554
GRMZM2G126541	6.546
GRMZM2G453805	6.545
GRMZM2G164405	6.539
GRMZM2G043799	6.531
GRMZM5G809417	6.499
GRMZM2G170281	6.493
GRMZM2G061527	6.486
AC234190.1_FG002	6.471
GRMZM2G062974	6.456
GRMZM2G162098	6.454
GRMZM2G438871	6.426
GRMZM2G385428	6.425
GRMZM2G088778	6.42
GRMZM2G029270	6.414
GRMZM2G447795	6.411
GRMZM2G097524	6.401
GRMZM2G107481	6.4
GRMZM2G077655	6.388
GRMZM5G814057	6.388
GRMZM2G125669	6.385
GRMZM2G142919	6.381
GRMZM2G112074	6.366
GRMZM2G355846	6.364
GRMZM2G178817	6.362
AC207628.4_FG010	6.358
GRMZM2G134708	6.352
GRMZM2G047791	6.349
GRMZM2G011151	6.348
GRMZM5G894619	6.345
GRMZM2G400533	6.343
GRMZM2G356556	6.339
GRMZM2G366910	6.337
GRMZM2G086934	6.308
GRMZM2G367026	6.308
GRMZM2G063024	6.295
GRMZM2G147210	6.283
GRMZM2G047139	6.277
GRMZM2G399530	6.276
GRMZM2G178875	6.271
GRMZM2G061403	6.263
GRMZM2G161472	6.261
GRMZM5G863076	6.26
GRMZM2G162829	6.259
GRMZM2G130119	6.25
GRMZM2G461159	6.231
GRMZM2G372058	6.229
GRMZM2G117365	6.214
GRMZM2G044493	6.207
GRMZM2G087625	6.204
GRMZM2G394261	6.201
GRMZM2G010596	6.2
GRMZM2G450055	6.177
GRMZM2G131099	6.172
GRMZM2G061806	6.153
GRMZM2G065888	6.145
GRMZM2G302927	6.138
GRMZM2G047456	6.131
GRMZM2G312201	6.122
GRMZM2G100639	6.122
GRMZM2G415579	6.107
GRMZM2G056467	6.094
GRMZM5G877500	6.083
GRMZM2G148855	6.08
GRMZM2G381441	6.077
GRMZM2G141473	6.077
GRMZM2G112149	6.074
GRMZM2G080079	6.069
GRMZM2G112456	6.063
GRMZM2G080887	6.063
GRMZM5G842965	6.041
GRMZM2G333923	6.036
GRMZM2G100727	6.032
GRMZM2G083350	6.027
GRMZM2G030436	6.027
GRMZM2G075978	6.017
GRMZM2G125923	5.995
GRMZM5G882364	5.992
GRMZM2G119246	5.99
GRMZM2G314064	5.987
GRMZM2G479980	5.987
GRMZM2G119322	5.98
GRMZM2G143139	5.975
GRMZM2G053284	5.972
GRMZM2G173067	5.97
GRMZM2G099619	5.968
GRMZM2G400718	5.967
GRMZM2G468610	5.957
GRMZM2G044773	5.956
GRMZM5G849600	5.952
GRMZM2G174458	5.944
GRMZM2G041418	5.93
GRMZM2G064106	5.93
GRMZM2G081458	5.929
GRMZM2G174719	5.922
GRMZM2G481440	5.914
GRMZM2G170692	5.906
GRMZM2G150876	5.89
GRMZM2G033828	5.888
GRMZM2G041685	5.885
GRMZM2G093217	5.884
GRMZM2G145446	5.875
GRMZM2G146446	5.872
GRMZM2G101245	5.871
GRMZM2G138074	5.865
GRMZM2G074761	5.854
GRMZM2G059010	5.843
AC187560.5_FG003	5.842
GRMZM2G166176	5.841
GRMZM2G168392	5.84
GRMZM2G165746	5.833
GRMZM2G467893	5.819
GRMZM2G302701	5.813
GRMZM2G376103	5.805
GRMZM2G113203	5.799
GRMZM2G035755	5.797
GRMZM2G035531	5.79
GRMZM2G096454	5.787
GRMZM2G475952	5.787
GRMZM2G085078	5.779
GRMZM2G117707	5.775
GRMZM2G115612	5.757
GRMZM2G301148	5.754
GRMZM2G021909	5.74
GRMZM2G000035	5.738
GRMZM5G877547	5.736
GRMZM2G116629	5.729
GRMZM2G133781	5.724
GRMZM2G000427	5.716
GRMZM2G375807	5.715
AC149475.2_FG007	5.714
GRMZM2G096753	5.713
GRMZM2G315726	5.707
GRMZM2G180080	5.706
GRMZM2G309258	5.706
GRMZM2G009030	5.699
GRMZM2G159962	5.692
GRMZM2G117989	5.682
GRMZM2G026143	5.679
GRMZM2G453672	5.678
GRMZM2G125648	5.676
GRMZM2G133895	5.674
GRMZM2G030673	5.67
GRMZM2G071630	5.668
GRMZM2G026189	5.661
GRMZM2G027107	5.659
GRMZM2G358830	5.657
GRMZM2G325938	5.656
GRMZM2G365957	5.655
GRMZM2G160515	5.644
GRMZM2G133613	5.641
GRMZM2G055052	5.636
GRMZM2G123977	5.633
GRMZM2G118800	5.63
GRMZM2G374827	5.624
GRMZM6G314950	5.618
GRMZM2G380789	5.617
GRMZM2G376105	5.613
GRMZM2G013079	5.596
GRMZM2G060369	5.589
GRMZM2G132478	5.584
GRMZM2G553687	5.582
GRMZM2G054125	5.576
GRMZM2G124175	5.574
GRMZM2G470010	5.563
AC225346.3_FG001	5.56
GRMZM2G040309	5.558
GRMZM2G508931	5.551
AC206332.3_FG005	5.55
GRMZM5G893912	5.547
GRMZM2G053206	5.538
GRMZM2G075438	5.531
GRMZM2G470075	5.529
GRMZM2G132093	5.525
GRMZM2G162505	5.521
GRMZM2G162250	5.517
GRMZM2G012530	5.497
GRMZM2G468657	5.493
GRMZM2G055957	5.491
GRMZM2G024331	5.486
GRMZM2G167812	5.481
GRMZM2G148904	5.476
GRMZM2G091956	5.475
GRMZM2G170602	5.47
GRMZM2G540538	5.469
GRMZM2G464393	5.467
GRMZM2G391815	5.467
GRMZM2G014797	5.466
GRMZM2G176489	5.46
GRMZM2G081582	5.46
GRMZM2G361256	5.457
GRMZM2G126865	5.447
GRMZM2G018254	5.439
GRMZM2G161891	5.438
GRMZM2G055883	5.434
GRMZM2G303509	5.434
GRMZM2G379913	5.424
GRMZM2G067373	5.424
AC177897.2_FG002	5.423
GRMZM2G325014	5.421
GRMZM2G041369	5.416
GRMZM2G139874	5.416
GRMZM2G318299	5.409
GRMZM2G135132	5.405
GRMZM2G052389	5.405
GRMZM2G371033	5.401
GRMZM2G167886	5.4
GRMZM2G139952	5.397
GRMZM2G009353	5.396
AC196412.3_FG001	5.393
GRMZM2G174730	5.376
GRMZM2G076313	5.375
GRMZM2G074687	5.372
GRMZM2G431856	5.369
GRMZM2G012140	5.368
GRMZM2G107082	5.368
GRMZM2G359018	5.366
GRMZM2G334660	5.366
GRMZM2G010016	5.357
GRMZM2G140817	5.357
GRMZM2G359986	5.356
AC214635.3_FG006	5.352
GRMZM2G163883	5.349
GRMZM2G176282	5.349
GRMZM2G179550	5.348
GRMZM2G114337	5.341
GRMZM2G045155	5.339
AC213769.3_FG001	5.334
GRMZM2G055101	5.329
GRMZM2G305822	5.328
GRMZM2G113378	5.325
GRMZM2G352855	5.325
GRMZM2G009808	5.323
GRMZM5G804783	5.31
GRMZM5G851862	5.3
GRMZM5G838098	5.296
GRMZM2G156977	5.295
GRMZM2G108712	5.272
GRMZM2G079219	5.271
GRMZM2G075794	5.268
GRMZM2G170857	5.268
GRMZM2G004590	5.264
GRMZM2G082959	5.263
GRMZM2G127251	5.263
GRMZM2G172647	5.258
GRMZM2G120163	5.257
GRMZM2G163709	5.25
GRMZM2G119270	5.25
GRMZM2G109405	5.238
GRMZM2G079082	5.235
GRMZM2G055313	5.234
GRMZM2G174834	5.232
GRMZM2G358796	5.232
GRMZM2G090087	5.228
GRMZM2G071871	5.226
GRMZM2G430623	5.223
GRMZM2G316907	5.222
GRMZM2G097641	5.22
GRMZM2G023152	5.215
GRMZM2G477139	5.211
AC193630.3_FG003	5.208
GRMZM2G025105	5.207
GRMZM2G181536	5.206
GRMZM2G080516	5.204
GRMZM2G073884	5.203
GRMZM2G147752	5.202
GRMZM2G026083	5.2
GRMZM2G139535	5.198
GRMZM2G450498	5.197
GRMZM2G171370	5.188
GRMZM2G083980	5.187
GRMZM2G164912	5.186
GRMZM2G311500	5.184
GRMZM2G163110	5.18
GRMZM2G366065	5.179
GRMZM2G438007	5.173
GRMZM2G465165	5.173
GRMZM2G081886	5.172
GRMZM2G145460	5.168
GRMZM2G516301	5.166
GRMZM2G078576	5.164
AC185466.3_FG001	5.161
GRMZM2G416750	5.154
GRMZM2G178546	5.153
GRMZM2G456997	5.152
GRMZM5G853854	5.15
GRMZM2G377341	5.149
GRMZM2G043095	5.146
GRMZM2G146108	5.145
GRMZM5G825512	5.141
GRMZM2G336448	5.133
GRMZM2G095209	5.13
GRMZM2G087824	5.125
AC208110.2_FG005	5.121
GRMZM2G064969	5.12
GRMZM2G128114	5.116
GRMZM2G004298	5.111
GRMZM2G165778	5.11
GRMZM2G145870	5.11
GRMZM2G018806	5.109
GRMZM5G852779	5.106
GRMZM2G122126	5.105
GRMZM2G145568	5.102
GRMZM2G159013	5.102
GRMZM2G480439	5.1
GRMZM2G150098	5.097
GRMZM2G140824	5.097
GRMZM2G171254	5.094
GRMZM2G066067	5.089
GRMZM2G099454	5.083
GRMZM2G069325	5.072
GRMZM2G456644	5.066
GRMZM2G332821	5.064
GRMZM2G069542	5.061
GRMZM2G075244	5.052
GRMZM2G071288	5.051
GRMZM2G148087	5.05
GRMZM2G163008	5.042
GRMZM2G403719	5.042
GRMZM2G165631	5.041
GRMZM2G077500	5.035
GRMZM2G103599	5.034
GRMZM2G034611	5.034
GRMZM2G075461	5.031
GRMZM2G068151	5.029
GRMZM2G148026	5.028
AC193379.3_FG001	5.026
GRMZM2G145972	5.023
GRMZM2G150907	5.018
GRMZM2G151801	5.012
GRMZM2G084825	5.007
GRMZM2G090747	4.993
GRMZM2G051474	4.99
AC197355.3_FG001	4.985
GRMZM2G448957	4.982
GRMZM2G151406	4.979
GRMZM2G103342	4.971
GRMZM2G112617	4.969
GRMZM2G443829	4.969
GRMZM2G305066	4.968
GRMZM2G146866	4.96
GRMZM5G851266	4.956
GRMZM2G100121	4.954
GRMZM2G064473	4.948
GRMZM2G115280	4.946
GRMZM2G119578	4.944
GRMZM2G424804	4.938
GRMZM2G172230	4.937
GRMZM2G057789	4.937
GRMZM2G022740	4.93
GRMZM2G180172	4.929
AC234199.1_FG003	4.927
GRMZM2G021095	4.926
GRMZM2G440003	4.924
GRMZM5G806449	4.917
GRMZM2G061596	4.916
GRMZM2G169953	4.914
GRMZM2G040094	4.913
GRMZM2G026346	4.911
GRMZM2G304362	4.907
GRMZM2G044317	4.907
GRMZM2G037998	4.905
GRMZM2G079389	4.903
GRMZM2G061465	4.897
GRMZM2G388253	4.887
GRMZM2G047800	4.886
GRMZM2G426917	4.886
GRMZM2G174621	4.884
GRMZM2G347056	4.882
GRMZM2G094510	4.881
GRMZM2G463415	4.873
GRMZM2G057963	4.859
GRMZM2G135385	4.853
GRMZM2G072052	4.85
GRMZM2G164562	4.85
GRMZM2G467520	4.85
GRMZM2G353313	4.847
GRMZM2G125991	4.845
GRMZM2G332562	4.842
GRMZM2G013299	4.841
GRMZM2G077187	4.838
GRMZM2G456487	4.829
GRMZM2G171170	4.828
GRMZM2G004949	4.827
GRMZM2G117706	4.827
GRMZM2G135175	4.824
GRMZM2G426242	4.821
GRMZM2G001160	4.818
GRMZM2G116823	4.816
GRMZM2G139811	4.815
GRMZM2G014240	4.814
GRMZM2G087111	4.813
GRMZM2G012046	4.813
GRMZM2G071478	4.811
GRMZM2G452896	4.811
GRMZM2G155837	4.811
GRMZM2G345544	4.806
GRMZM2G118062	4.805
GRMZM2G131443	4.803
AC205413.4_FG003	4.8
GRMZM2G011526	4.8
GRMZM2G026889	4.789
GRMZM2G176630	4.788
GRMZM2G124732	4.785
GRMZM2G141931	4.784
GRMZM5G820122	4.783
GRMZM2G307397	4.778
GRMZM2G176403	4.778
GRMZM2G394410	4.768
GRMZM2G154267	4.768
GRMZM2G475984	4.767
GRMZM2G146047	4.761
GRMZM2G494514	4.757
GRMZM2G086773	4.746
GRMZM2G091303	4.746
GRMZM2G005024	4.741
GRMZM2G145407	4.739
GRMZM2G177340	4.735
GRMZM2G402165	4.733
GRMZM2G069335	4.729
GRMZM2G018314	4.727
GRMZM2G122810	4.719
GRMZM2G129375	4.715
GRMZM2G039254	4.714
GRMZM2G140908	4.707
GRMZM2G404237	4.704
GRMZM2G104299	4.702
GRMZM2G011541	4.697
GRMZM2G125943	4.694
GRMZM2G133421	4.693
AC196978.5_FG002	4.692
GRMZM5G814279	4.692
GRMZM2G309163	4.692
GRMZM2G124417	4.69
GRMZM2G015989	4.687
GRMZM2G333875	4.684
GRMZM2G098102	4.683
GRMZM5G815077	4.683
GRMZM2G044027	4.683
GRMZM2G366146	4.682
GRMZM2G036206	4.68
GRMZM2G081105	4.68
GRMZM2G412986	4.679
GRMZM5G892035	4.677
GRMZM2G003526	4.677
GRMZM2G070673	4.674
GRMZM2G010823	4.674
GRMZM2G386952	4.674
GRMZM2G351074	4.67
GRMZM2G463574	4.67
GRMZM2G144407	4.669
AC208110.2_FG011	4.669
GRMZM2G124091	4.666
GRMZM2G060611	4.662
GRMZM2G324157	4.661
GRMZM5G842961	4.654
GRMZM2G087875	4.654
GRMZM2G387383	4.653
GRMZM2G160430	4.651
GRMZM2G319375	4.646
GRMZM2G001631	4.645
GRMZM2G013170	4.645
GRMZM5G829778	4.642
GRMZM5G862540	4.64
GRMZM2G149935	4.638
GRMZM2G165060	4.637
GRMZM2G048616	4.635
GRMZM2G382035	4.634
GRMZM2G152549	4.628
GRMZM2G100452	4.627
AC234152.1_FG007	4.624
GRMZM2G054040	4.619
GRMZM2G014805	4.619
GRMZM2G130897	4.617
GRMZM2G006197	4.613
GRMZM2G407650	4.612
GRMZM2G386228	4.61
GRMZM2G124229	4.604
GRMZM2G148355	4.601
GRMZM2G018869	4.6
GRMZM2G058690	4.596
GRMZM2G445261	4.594
GRMZM2G179792	4.591
GRMZM2G377311	4.591
GRMZM2G080851	4.589
GRMZM2G020040	4.588
GRMZM2G063151	4.587
GRMZM2G089713	4.583
GRMZM2G051898	4.582
GRMZM2G112548	4.577
GRMZM2G134597	4.576
GRMZM2G021378	4.575
GRMZM2G472023	4.574
GRMZM2G437113	4.57
GRMZM2G553532	4.569
GRMZM2G342907	4.564
GRMZM2G107116	4.562
GRMZM2G031802	4.559
GRMZM2G072658	4.559
GRMZM2G169564	4.559
GRMZM2G322728	4.557
GRMZM2G113056	4.556
GRMZM2G303909	4.555
GRMZM2G403151	4.554
GRMZM2G447551	4.551
GRMZM5G847219	4.549
GRMZM2G093826	4.548
GRMZM2G072142	4.546
GRMZM2G123371	4.544
GRMZM2G477205	4.543
GRMZM2G107380	4.542
GRMZM2G117378	4.541
AC198725.4_FG009	4.535
GRMZM2G059740	4.535
GRMZM5G833332	4.534
GRMZM2G116126	4.534
GRMZM2G048801	4.532
GRMZM2G107639	4.53
GRMZM2G020721	4.53
GRMZM2G069405	4.529
GRMZM2G128693	4.527
GRMZM2G134396	4.527
GRMZM2G027862	4.52
GRMZM2G017805	4.516
GRMZM2G095340	4.512
GRMZM2G000039	4.512
GRMZM2G394962	4.51
GRMZM2G341404	4.51
GRMZM2G057491	4.505
GRMZM2G062052	4.504
GRMZM2G145752	4.503
GRMZM2G108115	4.502
GRMZM2G110330	4.501
GRMZM2G319138	4.499
GRMZM2G142030	4.492
GRMZM2G154881	4.487
GRMZM2G161293	4.482
GRMZM2G341732	4.481
GRMZM2G088819	4.477
GRMZM2G091672	4.477
GRMZM2G133198	4.473
GRMZM2G135013	4.471
AC203761.3_FG002	4.469
GRMZM2G005825	4.467
AC191283.3_FG004	4.467
GRMZM2G451672	4.461
GRMZM2G015190	4.46
GRMZM2G025491	4.46
GRMZM2G041125	4.459
GRMZM2G089400	4.454
GRMZM2G090980	4.453
GRMZM2G140754	4.453
GRMZM2G041701	4.451
GRMZM2G121237	4.45
GRMZM2G168654	4.444
GRMZM2G007028	4.444
GRMZM2G375249	4.441
GRMZM2G013776	4.434
GRMZM2G107228	4.427
GRMZM2G159756	4.425
GRMZM5G859099	4.422
GRMZM2G413135	4.421
GRMZM2G026447	4.418
GRMZM2G011025	4.415
GRMZM2G095865	4.409
GRMZM2G476810	4.404
GRMZM2G069722	4.403
GRMZM5G806784	4.402
AC207756.3_FG001	4.402
GRMZM2G071292	4.399
GRMZM2G023346	4.398
GRMZM2G160175	4.394
GRMZM2G146206	4.393
GRMZM2G380438	4.392
GRMZM2G147966	4.391
GRMZM2G169580	4.39
GRMZM2G065665	4.39
GRMZM2G328785	4.388
GRMZM2G476040	4.386
GRMZM2G008642	4.386
GRMZM2G339562	4.386
GRMZM2G103357	4.383
GRMZM5G873277	4.382
GRMZM2G073814	4.382
GRMZM2G327032	4.38
GRMZM2G123585	4.378
GRMZM2G151921	4.377
GRMZM2G132995	4.375
GRMZM2G109286	4.369
GRMZM2G027835	4.362
GRMZM2G066820	4.361
GRMZM5G883764	4.355
GRMZM2G160506	4.354
GRMZM2G154678	4.353
GRMZM2G085974	4.351
GRMZM2G007736	4.347
GRMZM2G099467	4.347
GRMZM2G130728	4.345
GRMZM2G101928	4.345
GRMZM2G044237	4.344
GRMZM2G060714	4.344
GRMZM2G041774	4.343
GRMZM2G340656	4.342
GRMZM2G348993	4.338
GRMZM2G364172	4.336
GRMZM2G115998	4.332
GRMZM2G004858	4.332
GRMZM2G331533	4.329
GRMZM2G573867	4.329
GRMZM2G476000	4.329
GRMZM2G412150	4.326
GRMZM2G151204	4.325
GRMZM2G420280	4.325
GRMZM5G827205	4.319
AC234163.1_FG002	4.318
GRMZM2G029798	4.317
GRMZM2G134162	4.315
GRMZM2G465987	4.314
GRMZM2G116335	4.312
GRMZM2G177165	4.311
GRMZM2G160611	4.31
GRMZM2G314660	4.31
GRMZM2G117064	4.306
GRMZM2G406089	4.306
GRMZM6G559102	4.305
GRMZM2G139813	4.305
GRMZM2G305124	4.302
GRMZM2G431021	4.299
GRMZM2G400784	4.299
GRMZM2G025592	4.297
GRMZM2G024437	4.293
GRMZM2G312871	4.292
GRMZM2G146158	4.289
GRMZM2G521844	4.285
GRMZM2G305080	4.285
GRMZM2G093020	4.284
GRMZM2G102056	4.281
GRMZM2G081642	4.28
GRMZM2G363408	4.28
GRMZM2G359924	4.279
GRMZM2G112285	4.274
GRMZM2G130904	4.272
GRMZM6G310687	4.27
GRMZM2G123843	4.269
GRMZM2G164814	4.269
GRMZM2G416120	4.265
GRMZM2G087740	4.264
GRMZM2G374971	4.264
GRMZM2G347766	4.263
GRMZM2G117865	4.261
GRMZM2G036564	4.259
GRMZM2G109515	4.258
GRMZM2G142660	4.257
GRMZM2G089102	4.255
GRMZM2G170829	4.25
GRMZM2G070199	4.249
GRMZM2G140342	4.249
GRMZM2G154811	4.246
GRMZM2G133802	4.244
GRMZM2G085236	4.243
GRMZM5G805874	4.24
GRMZM5G826911	4.24
GRMZM2G540772	4.239
GRMZM2G124921	4.237
GRMZM2G464976	4.237
GRMZM2G008657	4.235
GRMZM2G402977	4.234
GRMZM2G098301	4.233
GRMZM2G080889	4.232
GRMZM2G159759	4.232
GRMZM2G069976	4.229
GRMZM2G133006	4.224
GRMZM2G152901	4.224
GRMZM2G003411	4.221
GRMZM2G043579	4.22
GRMZM2G090241	4.219
GRMZM2G141376	4.216
GRMZM2G113512	4.216
GRMZM2G180086	4.215
GRMZM2G152888	4.214
GRMZM2G403076	4.214
GRMZM2G107322	4.212
GRMZM2G047167	4.21
GRMZM2G175593	4.208
GRMZM2G074572	4.206
GRMZM2G126062	4.204
GRMZM2G030768	4.199
GRMZM2G026203	4.198
GRMZM2G378452	4.195
GRMZM2G051912	4.194
GRMZM2G382413	4.194
GRMZM2G031876	4.192
GRMZM2G113191	4.19
GRMZM2G018108	4.188
GRMZM2G163427	4.186
AC233853.1_FG003	4.182
GRMZM2G013639	4.179
GRMZM2G045720	4.178
GRMZM2G101250	4.175
GRMZM2G105221	4.173
GRMZM2G157683	4.172
GRMZM2G062638	4.172
GRMZM2G029243	4.168
GRMZM2G162445	4.168
GRMZM2G009735	4.167
GRMZM2G052728	4.165
GRMZM2G137435	4.165
GRMZM2G179253	4.155
GRMZM2G072653	4.154
GRMZM2G100412	4.154
GRMZM2G105092	4.153
GRMZM2G020940	4.151
AC233955.1_FG008	4.147
GRMZM2G083344	4.141
GRMZM2G060762	4.141
GRMZM2G060919	4.14
GRMZM2G117700	4.14
GRMZM2G011631	4.139
GRMZM2G024024	4.138
GRMZM2G004278	4.137
GRMZM2G174315	4.136
GRMZM2G173967	4.134
GRMZM2G024374	4.132
GRMZM2G038882	4.13
GRMZM2G423129	4.13
GRMZM2G032602	4.123
GRMZM2G054905	4.121
GRMZM2G001426	4.12
GRMZM2G171713	4.119
GRMZM2G338691	4.115
GRMZM2G114048	4.109
GRMZM2G140917	4.109
GRMZM2G155506	4.108
GRMZM2G061663	4.104
GRMZM2G022616	4.103
GRMZM2G469721	4.102
GRMZM2G157241	4.099
GRMZM2G178955	4.098
GRMZM2G041394	4.09
GRMZM2G146951	4.089
GRMZM2G133978	4.087
GRMZM2G433076	4.087
GRMZM2G479906	4.084
GRMZM2G036034	4.08
GRMZM2G016382	4.076
GRMZM2G033871	4.074
GRMZM2G166903	4.074
GRMZM2G132032	4.074
GRMZM2G133943	4.073
AC212835.3_FG008	4.07
GRMZM2G087827	4.066
GRMZM2G331088	4.065
GRMZM2G100754	4.061
GRMZM5G808836	4.059
GRMZM2G061732	4.056
GRMZM2G099297	4.054
GRMZM5G801651	4.054
GRMZM2G328500	4.052
GRMZM2G045976	4.049
GRMZM2G065893	4.047
GRMZM2G164325	4.046
GRMZM2G084463	4.043
GRMZM2G021896	4.042
GRMZM2G389937	4.042
GRMZM2G396640	4.041
GRMZM2G053004	4.04
GRMZM2G127297	4.039
GRMZM2G087712	4.037
GRMZM2G376542	4.037
GRMZM2G088761	4.037
GRMZM2G138355	4.035
GRMZM2G124886	4.03
GRMZM2G114093	4.029
GRMZM2G120876	4.029
GRMZM2G376661	4.028
GRMZM2G108714	4.028
GRMZM2G389173	4.027
GRMZM2G102862	4.025
AC234156.1_FG005	4.024
GRMZM2G308351	4.021
AC199363.4_FG003	4.016
GRMZM2G481531	4.016
GRMZM2G095810	4.016
GRMZM2G442658	4.015
GRMZM5G891159	4.015
GRMZM2G401436	4.012
GRMZM2G091481	4.011
GRMZM2G048522	4.006
GRMZM2G065480	4.005
GRMZM5G887243	4.005
GRMZM2G357734	4.004
GRMZM2G128268	4.003
GRMZM2G042789	4.002
GRMZM2G094602	3.999
GRMZM2G003563	3.999
GRMZM2G004160	3.996
GRMZM5G871471	3.995
GRMZM2G119864	3.99
GRMZM2G096343	3.988
GRMZM2G410916	3.986
AC204515.4_FG006	3.985
GRMZM2G002173	3.985
GRMZM5G842886	3.983
GRMZM2G015753	3.982
GRMZM2G021605	3.981
GRMZM2G370044	3.981
GRMZM2G407189	3.976
GRMZM2G300141	3.973
GRMZM2G092284	3.971
GRMZM2G002416	3.968
GRMZM2G056329	3.966
GRMZM2G086628	3.964
GRMZM2G440972	3.964
GRMZM2G010861	3.959
GRMZM2G121776	3.955
GRMZM2G113439	3.954
GRMZM2G150468	3.953
GRMZM2G324903	3.952
GRMZM2G060276	3.95
GRMZM2G413544	3.948
GRMZM2G020631	3.947
GRMZM2G545336	3.945
GRMZM2G313460	3.943
GRMZM5G849099	3.943
GRMZM2G090043	3.941
GRMZM2G408598	3.94
GRMZM2G300945	3.939
GRMZM2G087619	3.939
GRMZM2G119725	3.938
GRMZM2G457415	3.938
GRMZM2G019185	3.937
GRMZM2G084767	3.937
GRMZM2G130043	3.934
GRMZM2G027198	3.933
GRMZM2G318033	3.93
GRMZM2G145827	3.929
GRMZM2G354909	3.929
GRMZM2G108384	3.925
GRMZM2G103864	3.924
GRMZM2G168510	3.924
GRMZM5G825193	3.923
GRMZM2G135862	3.921
GRMZM2G158008	3.917
GRMZM2G022904	3.916
GRMZM2G174511	3.915
GRMZM2G065157	3.913
GRMZM2G011456	3.913
GRMZM2G036288	3.913
GRMZM2G401267	3.912
GRMZM2G071163	3.91
GRMZM2G093173	3.908
GRMZM2G304573	3.907
GRMZM2G086845	3.906
GRMZM2G178533	3.905
GRMZM2G156238	3.901
AC207533.2_FG002	3.9
GRMZM2G131442	3.899
GRMZM2G117250	3.895
GRMZM2G036019	3.894
GRMZM2G151169	3.893
AC233878.1_FG004	3.893
GRMZM2G127632	3.892
GRMZM2G100102	3.891
GRMZM2G097977	3.888
GRMZM2G365185	3.887
GRMZM2G314110	3.886
GRMZM2G138131	3.886
GRMZM2G008714	3.885
GRMZM2G404207	3.884
GRMZM2G038309	3.883
GRMZM2G116087	3.883
GRMZM2G010202	3.879
GRMZM2G169562	3.875
GRMZM2G127141	3.868
GRMZM2G363813	3.868
GRMZM2G139175	3.868
AC215690.3_FG002	3.867
GRMZM2G335287	3.866
GRMZM2G009591	3.864
GRMZM2G007546	3.864
GRMZM5G832908	3.863
GRMZM2G323679	3.862
GRMZM2G153208	3.861
GRMZM2G042607	3.86
GRMZM2G090414	3.858
GRMZM2G015143	3.857
GRMZM2G055982	3.855
GRMZM2G004795	3.852
AC191009.3_FG004	3.852
GRMZM2G043300	3.848
GRMZM2G133050	3.848
GRMZM2G449681	3.848
GRMZM2G082836	3.847
GRMZM2G347027	3.846
GRMZM2G021704	3.846
GRMZM2G348729	3.845
GRMZM2G160702	3.844
GRMZM5G866758	3.843
GRMZM2G381378	3.842
GRMZM2G156121	3.84
GRMZM2G116271	3.839
GRMZM2G053803	3.837
GRMZM2G083797	3.837
GRMZM2G150256	3.837
GRMZM2G147268	3.835
GRMZM2G090738	3.835
GRMZM2G054070	3.834
GRMZM2G180720	3.832
GRMZM2G005955	3.829
GRMZM2G063880	3.829
GRMZM2G058128	3.828
GRMZM2G172330	3.826
GRMZM2G099491	3.826
GRMZM2G009837	3.821
AC217401.3_FG003	3.821
GRMZM2G159811	3.817
GRMZM2G326222	3.813
GRMZM2G165357	3.813
GRMZM2G015804	3.81
GRMZM2G079263	3.809
GRMZM2G119714	3.809
GRMZM2G160585	3.808
GRMZM2G329069	3.808
GRMZM2G349839	3.805
GRMZM2G119773	3.805
GRMZM2G427815	3.803
GRMZM2G379780	3.803
GRMZM2G063511	3.802
GRMZM2G087662	3.8
GRMZM2G163141	3.8
GRMZM2G114706	3.799
GRMZM2G159388	3.793
GRMZM2G103805	3.792
GRMZM2G365374	3.791
GRMZM2G439903	3.791
GRMZM5G869635	3.789
GRMZM2G126019	3.789
GRMZM2G387381	3.788
GRMZM2G106265	3.788
GRMZM2G128651	3.788
GRMZM2G131334	3.787
GRMZM2G431243	3.779
GRMZM2G411333	3.777
GRMZM2G009627	3.777
GRMZM2G164612	3.777
GRMZM2G135337	3.776
GRMZM2G164743	3.774
GRMZM2G136300	3.768
GRMZM2G434173	3.768
GRMZM2G083058	3.767
GRMZM2G308064	3.767
GRMZM2G309025	3.764
GRMZM2G024476	3.764
GRMZM2G055899	3.764
GRMZM2G149923	3.763
AC235011.1_FG012	3.761
GRMZM2G384884	3.758
GRMZM2G121573	3.755
GRMZM2G091069	3.753
GRMZM2G056608	3.753
GRMZM2G003331	3.753
GRMZM2G094951	3.752
GRMZM2G477872	3.752
GRMZM2G073779	3.752
GRMZM2G311165	3.75
AC197146.3_FG001	3.749
GRMZM2G051917	3.749
GRMZM2G179424	3.749
GRMZM2G022298	3.749
GRMZM2G014577	3.747
GRMZM2G145063	3.746
GRMZM2G348909	3.745
GRMZM5G822591	3.745
GRMZM2G047652	3.744
GRMZM2G021831	3.744
AC206901.3_FG005	3.744
GRMZM2G165044	3.743
GRMZM2G048073	3.742
GRMZM2G178917	3.741
GRMZM2G072894	3.74
GRMZM2G071087	3.739
GRMZM2G481730	3.738
GRMZM2G044143	3.737
GRMZM2G118172	3.737
GRMZM2G075158	3.737
AC203535.4_FG007	3.733
GRMZM2G171736	3.731
GRMZM2G025366	3.73
GRMZM2G042623	3.727
GRMZM2G018416	3.726
GRMZM2G173928	3.726
GRMZM2G399073	3.725
GRMZM2G140674	3.723
GRMZM2G482256	3.721
GRMZM2G133213	3.721
GRMZM2G131055	3.717
GRMZM2G027995	3.715
GRMZM2G136567	3.714
GRMZM2G078926	3.713
GRMZM5G801793	3.71
GRMZM2G005195	3.71
GRMZM2G395749	3.708
GRMZM2G127121	3.707
GRMZM2G441511	3.706
GRMZM2G034534	3.705
GRMZM2G176085	3.704
GRMZM2G159724	3.703
GRMZM2G018756	3.701
AC196961.2_FG003	3.7
GRMZM2G146337	3.699
GRMZM2G050126	3.698
GRMZM2G028980	3.698
GRMZM2G010452	3.697
GRMZM2G084486	3.697
GRMZM2G406603	3.695
GRMZM2G438602	3.695
GRMZM2G166897	3.693
GRMZM2G353895	3.693
GRMZM2G080247	3.69
GRMZM2G128877	3.69
GRMZM2G319573	3.688
GRMZM2G339091	3.686
GRMZM2G110309	3.685
GRMZM2G325804	3.683
GRMZM2G335126	3.682
GRMZM2G013283	3.68
GRMZM2G388585	3.678
GRMZM2G067436	3.677
GRMZM2G162065	3.677
GRMZM2G003409	3.675
GRMZM2G117238	3.674
GRMZM5G818068	3.674
GRMZM2G050450	3.674
GRMZM2G086403	3.671
GRMZM2G028830	3.671
GRMZM2G361847	3.666
GRMZM2G018126	3.666
GRMZM2G116238	3.665
GRMZM2G382711	3.664
GRMZM2G157772	3.662
GRMZM2G443903	3.661
GRMZM2G111529	3.661
GRMZM2G099987	3.66
GRMZM2G006117	3.658
GRMZM2G138624	3.658
GRMZM2G147882	3.658
GRMZM2G133029	3.654
GRMZM2G429169	3.653
AC230020.1_FG002	3.649
GRMZM2G377451	3.649
GRMZM2G007404	3.647
GRMZM2G105954	3.647
GRMZM2G071645	3.647
GRMZM2G067402	3.646
GRMZM2G474326	3.646
GRMZM2G075117	3.646
GRMZM2G431018	3.645
GRMZM2G366659	3.645
GRMZM2G704285	3.642
AC190922.3_FG007	3.638
GRMZM2G149219	3.638
GRMZM2G142266	3.636
GRMZM2G098677	3.635
GRMZM2G074604	3.635
AC196278.2_FG003	3.633
GRMZM2G092001	3.633
GRMZM2G137507	3.633
GRMZM2G024303	3.631
GRMZM2G117388	3.63
GRMZM2G025860	3.626
GRMZM2G109009	3.623
GRMZM2G160032	3.623
AC152495.1_FG002	3.622
GRMZM2G077420	3.621
GRMZM2G103937	3.619
GRMZM2G474777	3.617
GRMZM2G147446	3.617
GRMZM2G098900	3.616
GRMZM2G474092	3.616
GRMZM2G068973	3.615
GRMZM2G385989	3.615
GRMZM2G036120	3.615
GRMZM2G358768	3.615
GRMZM2G064603	3.615
GRMZM2G013781	3.611
GRMZM2G158721	3.61
GRMZM2G361693	3.61
GRMZM2G401831	3.609
GRMZM5G836827	3.609
GRMZM5G806358	3.608
GRMZM2G124059	3.605
GRMZM2G020553	3.603
GRMZM2G050172	3.601
GRMZM2G047365	3.601
GRMZM2G350793	3.6
GRMZM2G113840	3.6
GRMZM2G005163	3.6
GRMZM2G085378	3.6
GRMZM2G013588	3.6
GRMZM2G009940	3.6
GRMZM2G062024	3.6
GRMZM2G449123	3.599
GRMZM2G381395	3.599
GRMZM2G077914	3.598
GRMZM2G176029	3.598
GRMZM2G047152	3.597
GRMZM2G088218	3.597
GRMZM5G800751	3.596
GRMZM2G036063	3.593
GRMZM2G040920	3.593
GRMZM2G067747	3.591
AC204070.3_FG004	3.591
GRMZM2G014089	3.59
GRMZM2G068714	3.59
GRMZM2G479125	3.589
GRMZM2G443265	3.589
GRMZM2G349565	3.589
GRMZM2G141535	3.589
GRMZM2G069676	3.589
GRMZM5G841914	3.588
GRMZM2G140443	3.587
GRMZM2G348578	3.585
GRMZM2G376085	3.584
GRMZM2G480381	3.583
GRMZM2G427097	3.583
GRMZM5G897546	3.583
GRMZM2G364375	3.582
GRMZM2G475293	3.58
GRMZM2G077004	3.58
GRMZM5G812272	3.58
GRMZM2G090274	3.579
GRMZM2G157845	3.578
GRMZM2G042278	3.578
GRMZM2G097739	3.578
GRMZM2G033665	3.575
GRMZM2G081048	3.575
GRMZM2G054093	3.575
GRMZM5G841619	3.573
GRMZM2G456564	3.572
GRMZM2G172787	3.571
GRMZM2G478382	3.571
GRMZM2G403407	3.571
GRMZM2G052855	3.569
GRMZM2G396231	3.569
GRMZM2G115646	3.568
GRMZM2G103179	3.568
GRMZM2G043383	3.568
GRMZM2G081192	3.567
GRMZM2G077316	3.567
GRMZM2G475897	3.566
GRMZM2G399677	3.566
GRMZM2G409104	3.565
GRMZM2G309512	3.565
GRMZM2G075333	3.563
GRMZM2G458879	3.563
GRMZM2G585025	3.563
GRMZM2G138997	3.563
GRMZM5G841893	3.56
GRMZM2G130749	3.559
AC205057.3_FG004	3.557
GRMZM2G011101	3.557
GRMZM2G002002	3.556
GRMZM2G439198	3.556
GRMZM2G091358	3.556
GRMZM2G419436	3.553
GRMZM2G404769	3.553
AC184130.4_FG012	3.551
GRMZM2G037452	3.55
GRMZM2G145461	3.549
GRMZM2G057766	3.549
GRMZM2G143102	3.549
GRMZM2G316362	3.546
GRMZM2G113062	3.545
GRMZM2G013318	3.544
GRMZM2G132810	3.544
GRMZM2G007715	3.541
GRMZM2G134930	3.541
GRMZM2G136970	3.539
GRMZM2G040945	3.538
GRMZM2G349570	3.538
GRMZM2G150242	3.538
GRMZM2G135091	3.537
GRMZM2G461356	3.536
GRMZM2G459663	3.536
GRMZM5G898898	3.536
GRMZM2G008374	3.534
GRMZM2G106810	3.533
GRMZM2G351716	3.533
GRMZM2G408305	3.532
GRMZM2G029048	3.531
GRMZM2G058702	3.529
GRMZM2G177561	3.528
GRMZM2G073770	3.527
GRMZM2G301089	3.527
GRMZM2G107402	3.525
GRMZM2G131793	3.523
GRMZM2G399320	3.521
GRMZM5G813363	3.519
GRMZM2G175265	3.519
GRMZM2G059151	3.519
GRMZM2G140339	3.519
GRMZM2G075680	3.516
GRMZM2G016997	3.516
GRMZM2G001915	3.516
AC203424.3_FG001	3.515
GRMZM2G141587	3.51
GRMZM2G083285	3.508
GRMZM2G117346	3.508
GRMZM2G448458	3.508
GRMZM2G379577	3.507
GRMZM2G068952	3.505
GRMZM2G019621	3.505
GRMZM2G479243	3.505
GRMZM2G002138	3.505
GRMZM2G139920	3.505
GRMZM2G147724	3.504
GRMZM2G440943	3.503
GRMZM2G018573	3.5
GRMZM2G165747	3.5
GRMZM2G048150	3.498
GRMZM2G046590	3.497
AC210173.4_FG002	3.497
GRMZM2G702253	3.497
GRMZM2G157820	3.497
GRMZM2G477113	3.496
GRMZM2G145107	3.494
GRMZM2G118641	3.494
AC234175.1_FG010	3.493
GRMZM2G447617	3.493
GRMZM2G412430	3.492
GRMZM2G012319	3.492
GRMZM2G053338	3.488
GRMZM2G098031	3.486
GRMZM2G423886	3.486
GRMZM5G884270	3.484
GRMZM2G020865	3.484
GRMZM2G047414	3.483
AC209858.4_FG002	3.483
GRMZM2G126594	3.483
GRMZM2G423863	3.483
GRMZM2G468479	3.482
GRMZM5G857708	3.482
GRMZM5G864735	3.481
AC213600.3_FG002	3.481
GRMZM2G086237	3.481
GRMZM2G022793	3.479
GRMZM2G078500	3.477
GRMZM2G055699	3.475
GRMZM2G180211	3.474
GRMZM2G365423	3.474
GRMZM2G047095	3.473
AC235544.1_FG004	3.471
GRMZM2G442008	3.471
GRMZM2G052750	3.471
GRMZM2G021560	3.471
GRMZM2G068455	3.47
GRMZM2G060872	3.469
GRMZM2G117228	3.469
GRMZM2G017616	3.467
GRMZM2G044194	3.466
GRMZM2G011253	3.465
GRMZM5G801436	3.464
GRMZM2G038165	3.464
GRMZM2G083328	3.464
GRMZM2G041994	3.463
GRMZM2G129357	3.463
GRMZM2G073774	3.462
GRMZM2G392798	3.461
GRMZM2G118241	3.461
GRMZM2G071441	3.461
GRMZM2G121123	3.46
GRMZM2G155375	3.459
GRMZM2G012088	3.458
GRMZM2G107956	3.458
GRMZM2G149211	3.457
AC214040.3_FG009	3.457
GRMZM2G059706	3.456
GRMZM2G050997	3.456
GRMZM2G101513	3.455
GRMZM2G087212	3.452
GRMZM2G148374	3.452
GRMZM2G176707	3.452
GRMZM2G100067	3.451
GRMZM5G887631	3.45
GRMZM2G381453	3.449
AC205502.4_FG004	3.447
GRMZM2G494186	3.446
GRMZM2G143725	3.446
GRMZM2G008287	3.445
GRMZM2G030272	3.444
AC149475.2_FG002	3.442
GRMZM2G093446	3.441
GRMZM2G180596	3.441
GRMZM2G063253	3.437
GRMZM2G123587	3.437
GRMZM2G077054	3.435
GRMZM2G048819	3.435
GRMZM2G014872	3.434
GRMZM2G059214	3.432
GRMZM2G075828	3.43
GRMZM2G098622	3.429
GRMZM2G028036	3.428
GRMZM2G022642	3.428
GRMZM2G323415	3.427
GRMZM2G083012	3.426
GRMZM2G079256	3.426
GRMZM2G452633	3.423
GRMZM2G461808	3.423
GRMZM2G160417	3.422
GRMZM2G003172	3.42
GRMZM2G178618	3.418
GRMZM2G061681	3.418
GRMZM2G047434	3.417
GRMZM2G007791	3.416
AC193324.3_FG002	3.415
GRMZM2G061704	3.414
GRMZM2G477146	3.414
AC177908.3_FG002	3.413
GRMZM2G138744	3.413
GRMZM2G112309	3.413
GRMZM2G079583	3.407
GRMZM2G106303	3.407
GRMZM5G885628	3.407
GRMZM5G817651	3.406
GRMZM2G547542	3.401
GRMZM2G172032	3.399
GRMZM2G163325	3.399
GRMZM2G011888	3.398
GRMZM2G133028	3.398
GRMZM2G077669	3.397
GRMZM2G176977	3.396
GRMZM2G389948	3.396
GRMZM2G143765	3.395
AC226723.2_FG001	3.394
GRMZM2G075262	3.394
GRMZM2G015067	3.394
GRMZM2G470438	3.392
GRMZM2G163507	3.392
GRMZM2G170559	3.391
GRMZM2G098697	3.39
GRMZM5G800975	3.389
GRMZM5G894568	3.388
GRMZM2G137409	3.385
GRMZM2G040158	3.384
GRMZM2G312419	3.383
GRMZM5G898887	3.383
GRMZM2G098875	3.382
GRMZM2G073399	3.382
GRMZM2G060999	3.382
GRMZM2G154743	3.382
GRMZM2G006219	3.381
GRMZM2G136884	3.381
GRMZM2G121683	3.381
GRMZM2G163307	3.38
GRMZM2G314563	3.379
GRMZM2G096355	3.378
GRMZM2G045031	3.377
GRMZM2G061742	3.376
GRMZM2G053396	3.376
GRMZM2G010085	3.374
GRMZM2G085970	3.373
GRMZM2G174708	3.373
GRMZM2G082191	3.372
GRMZM2G095778	3.372
GRMZM2G172726	3.372
AC198353.5_FG001	3.372
GRMZM2G143817	3.37
GRMZM2G309660	3.369
GRMZM2G460138	3.367
GRMZM2G076885	3.367
GRMZM2G343157	3.366
GRMZM2G028713	3.366
GRMZM2G430463	3.365
GRMZM2G055643	3.365
GRMZM2G156986	3.364
GRMZM2G006977	3.361
GRMZM2G411216	3.361
GRMZM2G065696	3.361
GRMZM2G437827	3.36
GRMZM2G090736	3.359
GRMZM2G038848	3.359
GRMZM2G015972	3.358
GRMZM2G314075	3.358
GRMZM2G135256	3.356
GRMZM2G043435	3.356
GRMZM2G307088	3.355
GRMZM2G145019	3.355
GRMZM2G305060	3.355
GRMZM5G872373	3.355
GRMZM2G156310	3.354
GRMZM2G052625	3.353
GRMZM2G015324	3.351
GRMZM2G052175	3.351
GRMZM2G061996	3.35
GRMZM2G008209	3.35
GRMZM2G016434	3.349
GRMZM2G134985	3.348
GRMZM2G006507	3.347
GRMZM2G054803	3.346
GRMZM2G143443	3.345
GRMZM2G054210	3.345
AC214266.3_FG002	3.344
AC190909.3_FG004	3.343
GRMZM2G346346	3.341
GRMZM2G118362	3.341
GRMZM2G133048	3.34
GRMZM2G048295	3.34
GRMZM2G370162	3.336
GRMZM2G046098	3.336
GRMZM2G002131	3.336
GRMZM2G388892	3.335
GRMZM2G089556	3.335
GRMZM2G124809	3.334
GRMZM2G051659	3.333
GRMZM2G101545	3.333
GRMZM2G133718	3.332
GRMZM2G032555	3.332
GRMZM2G177072	3.332
GRMZM2G044096	3.331
GRMZM2G306616	3.331
GRMZM2G087117	3.331
GRMZM2G328309	3.33
GRMZM2G587327	3.328
GRMZM5G813206	3.328
GRMZM5G845129	3.327
GRMZM2G000118	3.323
GRMZM2G128641	3.323
GRMZM2G143703	3.323
GRMZM2G151227	3.321
AC203366.4_FG001	3.321
GRMZM2G058472	3.321
GRMZM2G172774	3.32
GRMZM2G137707	3.319
GRMZM2G075470	3.319
GRMZM5G881887	3.318
GRMZM2G082916	3.318
GRMZM2G066485	3.317
GRMZM2G096952	3.316
GRMZM2G095348	3.315
GRMZM2G378906	3.313
GRMZM2G029951	3.313
GRMZM2G300624	3.312
GRMZM2G167318	3.311
GRMZM2G362303	3.311
GRMZM2G106703	3.309
GRMZM2G320705	3.308
GRMZM2G026171	3.307
GRMZM2G017682	3.305
GRMZM2G379804	3.302
GRMZM2G176542	3.302
GRMZM2G072513	3.299
GRMZM2G382350	3.299
GRMZM2G024499	3.298
GRMZM5G852170	3.297
GRMZM2G038893	3.297
GRMZM2G178398	3.296
GRMZM2G304965	3.296
GRMZM2G140587	3.296
GRMZM2G015844	3.294
GRMZM2G339563	3.294
GRMZM2G101900	3.292
GRMZM5G892742	3.291
GRMZM2G178753	3.291
GRMZM2G422750	3.291
GRMZM2G087326	3.29
GRMZM2G463580	3.287
GRMZM2G154007	3.287
GRMZM2G136624	3.287
GRMZM2G057466	3.286
GRMZM2G147589	3.286
GRMZM2G029785	3.286
GRMZM5G825854	3.286
GRMZM2G094850	3.286
GRMZM2G161566	3.285
GRMZM2G165521	3.284
GRMZM2G021219	3.284
GRMZM2G108829	3.283
GRMZM2G118345	3.283
GRMZM2G083239	3.281
GRMZM2G061354	3.281
GRMZM2G176443	3.28
GRMZM2G088261	3.28
GRMZM2G374088	3.279
GRMZM5G802858	3.278
GRMZM2G109070	3.276
GRMZM2G135651	3.275
GRMZM2G153760	3.274
GRMZM2G082653	3.274
GRMZM2G144367	3.274
GRMZM2G078890	3.273
GRMZM2G167492	3.273
GRMZM2G105510	3.272
GRMZM2G171383	3.272
GRMZM2G384755	3.271
GRMZM2G031400	3.27
GRMZM2G147884	3.269
GRMZM2G396451	3.265
GRMZM2G119256	3.265
GRMZM2G064640	3.264
GRMZM2G106213	3.263
GRMZM2G103070	3.263
GRMZM2G107205	3.262
GRMZM5G865319	3.261
GRMZM2G059073	3.261
GRMZM2G313162	3.261
GRMZM2G000236	3.261
GRMZM2G001991	3.26
GRMZM2G065655	3.259
GRMZM2G082709	3.259
GRMZM2G318633	3.259
GRMZM5G804976	3.259
GRMZM2G167741	3.255
GRMZM2G092661	3.255
GRMZM2G023232	3.254
GRMZM2G109605	3.252
GRMZM2G466578	3.252
GRMZM2G340444	3.251
GRMZM2G365035	3.251
GRMZM2G400470	3.25
GRMZM2G145944	3.25
GRMZM2G104400	3.249
GRMZM2G423643	3.248
GRMZM5G865576	3.246
GRMZM2G181371	3.245
GRMZM2G359799	3.245
GRMZM2G015912	3.245
GRMZM2G012213	3.244
GRMZM5G898867	3.244
GRMZM2G117619	3.241
GRMZM2G083246	3.238
GRMZM2G022398	3.238
GRMZM2G080314	3.238
GRMZM2G340257	3.238
GRMZM2G460025	3.238
GRMZM2G107987	3.237
GRMZM2G121543	3.236
GRMZM2G003518	3.235
GRMZM2G093072	3.235
GRMZM2G061702	3.235
GRMZM2G053458	3.23
GRMZM2G147051	3.23
GRMZM2G001332	3.228
GRMZM2G075780	3.226
GRMZM2G084181	3.223
GRMZM2G067019	3.223
GRMZM2G124918	3.222
GRMZM2G097226	3.222
GRMZM2G361633	3.22
GRMZM2G019515	3.22
GRMZM2G169820	3.218
GRMZM2G163054	3.218
GRMZM2G124371	3.217
GRMZM2G126285	3.217
GRMZM2G084757	3.216
GRMZM2G007160	3.214
GRMZM5G860137	3.214
GRMZM2G010834	3.212
GRMZM2G430362	3.211
GRMZM2G117454	3.211
GRMZM2G096020	3.209
GRMZM2G064503	3.209
GRMZM2G113423	3.209
GRMZM2G044044	3.208
GRMZM2G108364	3.208
GRMZM2G403111	3.207
GRMZM2G122362	3.206
GRMZM2G354013	3.203
GRMZM2G057841	3.203
GRMZM2G009849	3.203
GRMZM2G038252	3.203
GRMZM2G077937	3.202
GRMZM2G018018	3.201
GRMZM2G020801	3.2
GRMZM2G131026	3.199
GRMZM2G404132	3.197
GRMZM2G095043	3.197
GRMZM2G095326	3.196
GRMZM2G012501	3.195
GRMZM2G178209	3.194
GRMZM2G164502	3.194
GRMZM2G061629	3.191
GRMZM2G159237	3.19
GRMZM2G404965	3.19
GRMZM2G011136	3.189
GRMZM2G100809	3.189
GRMZM2G052078	3.189
GRMZM2G445791	3.188
GRMZM2G041732	3.188
GRMZM2G113421	3.185
GRMZM2G043602	3.184
GRMZM2G163860	3.184
GRMZM2G060583	3.184
GRMZM5G889999	3.183
GRMZM2G162145	3.182
GRMZM2G017334	3.182
GRMZM2G377595	3.182
GRMZM2G000645	3.181
GRMZM2G022403	3.181
GRMZM2G172427	3.181
GRMZM2G129268	3.181
GRMZM2G059937	3.179
AC209050.3_FG003	3.179
GRMZM2G033876	3.177
GRMZM2G051262	3.176
GRMZM2G416308	3.176
GRMZM2G010152	3.175
GRMZM5G840699	3.175
GRMZM2G139617	3.174
GRMZM2G376432	3.174
GRMZM2G072146	3.174
GRMZM2G017940	3.173
GRMZM2G081639	3.17
GRMZM2G401606	3.169
GRMZM2G046252	3.167
GRMZM2G041527	3.167
GRMZM2G053980	3.167
GRMZM2G110548	3.164
GRMZM2G097605	3.164
GRMZM2G104676	3.162
GRMZM2G067063	3.162
GRMZM2G109509	3.162
GRMZM2G328612	3.162
GRMZM2G089977	3.161
GRMZM2G407969	3.161
GRMZM2G096458	3.159
AC234185.1_FG004	3.159
GRMZM2G443953	3.158
GRMZM2G020814	3.157
GRMZM2G122290	3.156
GRMZM2G019171	3.156
GRMZM2G014136	3.156
GRMZM2G020740	3.155
GRMZM2G060824	3.155
GRMZM2G468299	3.153
GRMZM2G022679	3.152
AC217910.3_FG001	3.151
GRMZM2G350658	3.15
GRMZM2G111987	3.149
GRMZM2G701058	3.148
GRMZM2G167049	3.147
GRMZM2G004988	3.147
GRMZM2G127232	3.144
GRMZM2G417089	3.143
GRMZM2G147152	3.143
GRMZM2G171484	3.143
GRMZM2G017603	3.141
GRMZM2G334628	3.141
GRMZM2G011858	3.14
GRMZM2G119411	3.139
GRMZM2G079308	3.138
GRMZM2G545326	3.138
GRMZM2G157749	3.136
GRMZM2G165418	3.135
GRMZM2G070446	3.134
GRMZM2G064750	3.132
GRMZM2G177631	3.132
GRMZM2G099324	3.132
GRMZM2G170208	3.131
GRMZM2G040397	3.128
AC203408.4_FG003	3.127
GRMZM2G152360	3.127
GRMZM5G889467	3.127
GRMZM2G114484	3.126
GRMZM2G092244	3.125
GRMZM2G128876	3.125
GRMZM5G892151	3.124
GRMZM2G083855	3.124
GRMZM2G026065	3.124
GRMZM2G157019	3.123
GRMZM2G031581	3.122
GRMZM2G051311	3.122
GRMZM2G074540	3.121
GRMZM2G147701	3.121
GRMZM2G356076	3.121
GRMZM2G141355	3.119
GRMZM2G071277	3.119
GRMZM2G537291	3.118
GRMZM2G008663	3.118
GRMZM2G063216	3.118
GRMZM2G090669	3.117
GRMZM5G847387	3.117
GRMZM2G053939	3.116
GRMZM2G003988	3.116
GRMZM2G171723	3.115
GRMZM2G087275	3.115
GRMZM2G014276	3.115
GRMZM2G039757	3.114
GRMZM2G034536	3.112
GRMZM2G160609	3.112
GRMZM2G155073	3.112
GRMZM2G041878	3.112
GRMZM2G109120	3.111
GRMZM2G140070	3.111
GRMZM2G123764	3.111
GRMZM2G115304	3.11
GRMZM2G091558	3.109
GRMZM5G891373	3.109
GRMZM5G868433	3.108
GRMZM5G873295	3.108
GRMZM2G099337	3.107
GRMZM2G141642	3.107
GRMZM2G010298	3.105
GRMZM2G015132	3.104
GRMZM2G010048	3.104
GRMZM2G470499	3.104
GRMZM2G109651	3.103
GRMZM2G032104	3.102
GRMZM2G054765	3.102
GRMZM2G462062	3.1
GRMZM2G017349	3.1
GRMZM2G149108	3.099
GRMZM2G150201	3.098
GRMZM2G152175	3.097
GRMZM2G023023	3.097
GRMZM2G081037	3.097
GRMZM2G169326	3.097
GRMZM2G079645	3.094
GRMZM2G164277	3.093
GRMZM2G004349	3.092
GRMZM2G051004	3.091
GRMZM2G068177	3.091
GRMZM2G427090	3.09
GRMZM2G048434	3.089
GRMZM2G017164	3.088
GRMZM2G011998	3.088
GRMZM2G025906	3.087
GRMZM6G591706	3.087
GRMZM2G050647	3.087
GRMZM2G388045	3.086
GRMZM2G335685	3.086
GRMZM2G018142	3.086
GRMZM2G044337	3.085
GRMZM5G825192	3.085
GRMZM2G017022	3.085
GRMZM2G461447	3.083
GRMZM2G168249	3.081
GRMZM2G135816	3.081
GRMZM2G084819	3.081
GRMZM2G161285	3.081
GRMZM2G125193	3.08
GRMZM2G314386	3.079
GRMZM2G314679	3.079
GRMZM2G303775	3.079
GRMZM2G700757	3.078
GRMZM2G128176	3.078
GRMZM2G093716	3.075
GRMZM2G358059	3.075
GRMZM2G057571	3.073
GRMZM2G121905	3.073
GRMZM2G034019	3.072
GRMZM2G001033	3.071
[truncated: 24,448 more rows]

## Sheet: Table 5. Pfam
Supplementary Table 5 - Example gene Pfam domain annotation
Citation:	Goodstein, David M., Shengqiang Shu, Russell Howson, Rochak Neupane, Richard D. Hayes, Joni Fazo, Therese Mitros, William Dirks, Uffe Hellsten, Nicholas Putnam, and Daniel S. Rokhsar. 2012. “Phytozome: A Comparative Platform for Green Plant Genomics.” Nucleic Acids Research 40(D1):D1178–86.
DOI:	doi: 10.1093/nar/gkr944
Link:	https://phytozome.jgi.doe.gov/pz/portal.html
File:	Zmays_284_Ensembl-18_2010-01-MaizeSequence.annotation_info.txt
Notes:	(1) Genes with no annotated Pfam domains were removed
genes	Pfam
AC148152.3_FG001	PF13962,PF13637
AC148152.3_FG005	PF14226,PF03171
AC148152.3_FG006	PF02797
AC148152.3_FG008	PF00232
AC148167.6_FG001	PF06886
AC149475.2_FG002	PF05514
AC149475.2_FG003	PF10584,PF00227
AC149475.2_FG004	PF00133
AC149475.2_FG005	PF02375,PF02373
AC149475.2_FG007	PF00583
AC149810.2_FG003	PF00443,PF04780
AC149810.2_FG004	PF11947
AC149810.2_FG008	PF07714
AC149818.2_FG001	PF00025
AC149818.2_FG004	PF01111
AC149818.2_FG006	PF00179
AC149818.2_FG007	PF05340
AC149818.2_FG009	PF03195
AC149828.2_FG002	PF10584,PF00227
AC149828.2_FG004	PF07911
AC149829.2_FG003	PF04096,PF12110
AC149829.2_FG004	PF00010
AC149829.2_FG006	PF01344
AC150739.3_FG001	PF03479
AC152495.1_FG002	PF00931
AC152495.1_FG003	PF00931
AC152495.1_FG005	PF06454
AC152495.1_FG006	PF00176
AC152495.1_FG010	PF00931
AC152495.1_FG011	PF14111
AC152495.1_FG012	PF00583,PF01535,PF13246
AC152495.1_FG015	PF00931
AC152495.1_FG017	PF00931
AC155352.2_FG001	PF10312
AC155352.2_FG010	PF00234
AC155376.2_FG004	PF02181
AC155376.2_FG005	PF00232
AC155377.1_FG001	PF02736,PF00612,PF01843,PF00063
AC155377.1_FG002	PF00026
AC155390.2_FG002	PF12854,PF14432,PF01535,PF13041
AC155434.2_FG001	PF12146
AC155434.2_FG003	PF00026
AC155434.2_FG005	PF00249,PF14379
AC155434.2_FG006	PF02701
AC155496.2_FG009	PF10557,PF00888
AC155610.2_FG007	PF02458
AC155622.2_FG001	PF06957
AC155622.2_FG004	PF00400
AC155624.2_FG006	PF13672
AC155624.2_FG011	PF11833
AC159612.1_FG007	PF07983,PF00332
AC165171.2_FG002	PF03106
AC165178.2_FG002	PF08646
AC165178.2_FG004	PF00249
AC166636.1_FG007	PF00397
AC166636.1_FG008	PF00025
AC166636.1_FG009	PF00806
AC177840.3_FG005	PF02375
AC177893.3_FG003	PF04827
AC177893.3_FG005	PF02705
AC177897.2_FG002	PF13923
AC177897.2_FG020	PF09778
AC177897.2_FG021	PF00118
AC177897.2_FG022	PF00394,PF07731,PF07732
AC177897.2_FG029	PF10354
AC177899.2_FG009	PF13812,PF01535,PF13041
AC177899.2_FG012	PF02902
AC177908.3_FG002	PF01501
AC177924.2_FG001	PF00010
AC177933.2_FG005	PF03094
AC177936.6_FG008	PF00888,PF10557
AC182413.4_FG002	PF03018
AC182439.4_FG004	PF03694
AC182482.3_FG003	PF16916,PF01545
AC182617.3_FG001	PF01678
AC183315.4_FG006	PF00514
AC183590.4_FG001	PF04107
AC183656.2_FG005	PF08646
AC183782.3_FG002	PF03108
AC183932.3_FG007	PF13632
AC183938.4_FG011	PF06839
AC183950.2_FG002	PF13912
AC183950.2_FG004	PF03168
AC183950.2_FG005	PF01535,PF13041
AC184112.4_FG010	PF04525
AC184130.4_FG005	PF02469
AC184131.5_FG010	PF03552
AC184164.2_FG006	PF01612
AC184699.3_FG005	PF05834
AC184764.3_FG003	PF03087
AC184794.2_FG003	PF00854
AC184831.3_FG005	PF00320
AC184831.3_FG008	PF00320
AC184834.3_FG007	PF07714
AC184835.3_FG003	PF01490
AC184866.3_FG007	PF00046
AC184871.2_FG002	PF00493
AC185108.3_FG011	PF13912
AC185121.3_FG001	PF14569
AC185122.3_FG008	PF00665
AC185122.3_FG009	PF00144
AC185126.3_FG006	PF13639
AC185130.2_FG004	PF01435
AC185213.3_FG003	PF13041
AC185217.3_FG002	PF00226
AC185226.4_FG001	PF13374,PF12807,PF13236
AC185226.4_FG006	PF01112
AC185276.2_FG006	PF05786
AC185322.3_FG011	PF13968,PF04578
AC185415.3_FG005	PF00076,PF00641
AC185422.3_FG005	PF01657
AC185434.4_FG004	PF01486
AC185460.3_FG004	PF13639
AC185468.3_FG003	PF01873
AC185471.3_FG005	PF01221
AC185478.4_FG005	PF11250
AC185500.3_FG005	PF04424
AC185519.3_FG002	PF14569
AC185531.2_FG001	PF13405
AC185593.3_FG003	PF08137
AC185603.4_FG007	PF01745
AC185612.3_FG002	PF02265
AC185642.4_FG001	PF08555
AC185648.3_FG007	PF14360
AC185649.2_FG003	PF08555
AC185655.3_FG004	PF13912
AC185655.3_FG005	PF13912
AC185660.3_FG003	PF08555
AC186147.3_FG008	PF05637
AC186165.2_FG002	PF08774
AC186166.3_FG008	PF00403
AC186223.3_FG003	PF00733
AC186284.3_FG007	PF14111
AC186287.7_FG005	PF12738,PF03031
AC186333.2_FG006	PF07741
AC186379.3_FG001	PF13041
AC186519.4_FG002	PF02519
AC186524.3_FG005	PF00505
AC186529.4_FG014	PF00301
AC186577.3_FG006	PF04043
AC186579.3_FG007	PF13639
AC186585.4_FG002	PF01195
AC186603.6_FG003	PF00067
AC186604.4_FG003	PF01134
AC186606.4_FG003	PF00170
AC186743.4_FG003	PF04570
AC186802.4_FG002	PF00067
AC186902.4_FG009	PF04759
AC187050.4_FG004	PF06102
AC187072.4_FG002	PF01612
AC187082.3_FG002	PF10373
AC187088.3_FG002	PF00625
AC187098.4_FG011	PF00855
AC187157.4_FG001	PF00847
AC187157.4_FG002	PF05172
AC187157.4_FG005	PF00046,PF08670,PF01852
AC187285.5_FG004	PF00862
AC187551.3_FG002	PF01535,PF13041
AC187560.5_FG003	PF09425
AC187782.4_FG008	PF04502
AC187782.4_FG009	PF06376
AC187788.3_FG008	PF03514
AC187792.3_FG008	PF07714
AC187809.3_FG005	PF02902
AC187820.2_FG001	PF14111
AC187843.3_FG010	PF02365
AC187875.3_FG006	PF00483
AC187875.3_FG009	PF00689
AC187891.3_FG006	PF04844
AC187901.4_FG002	PF08646
AC187919.5_FG010	PF14570
AC188001.3_FG009	PF02840
AC188023.3_FG005	PF11341
AC188024.3_FG003	PF07714
AC188195.2_FG003	PF00280
AC188195.2_FG004	PF00280
AC188195.2_FG005	PF00280
AC188710.4_FG006	PF04578,PF13968
AC188718.3_FG005	PF03478
AC188718.3_FG011	PF03478
AC188718.3_FG015	PF03478
AC188752.3_FG011	PF12624,PF16908
AC188759.3_FG010	PF13041
AC188832.5_FG005	PF01486
AC188838.3_FG005	PF13537
AC189061.3_FG004	PF00069
AC189280.3_FG001	PF00439
AC189750.4_FG004	PF00085,PF01507
AC189754.3_FG004	PF01749
AC189795.3_FG001	PF14303
AC189879.3_FG003	PF16487,PF16488,PF08699,PF16486,PF02170,PF02171
AC190480.1_FG007	PF06813
AC190499.1_FG003	PF03101,PF13365
AC190518.1_FG002	PF03214
AC190560.2_FG002	PF02152
AC190561.3_FG002	PF07992
AC190582.4_FG011	PF13855
AC190588.3_FG003	PF12701
AC190609.3_FG001	PF07716
AC190609.3_FG002	PF01781
AC190609.3_FG003	PF08079,PF00327
AC190609.3_FG004	PF00026
AC190623.3_FG001	PF07123
AC190632.2_FG004	PF00071
AC190636.3_FG005	PF03171,PF14226
AC190638.3_FG001	PF08555
AC190682.3_FG014	PF03169
AC190688.3_FG006	PF01453
AC190700.3_FG002	PF14543
AC190713.3_FG004	PF16205
AC190716.3_FG001	PF00069
AC190734.2_FG003	PF03634
AC190740.2_FG004	PF02889
AC190749.3_FG006	PF03637
AC190750.2_FG014	PF00646
AC190753.4_FG002	PF00931
AC190772.4_FG011	PF00190
AC190788.2_FG005	PF00488
AC190807.2_FG001	PF00161
AC190822.2_FG003	PF09118
AC190829.3_FG002	PF00827
AC190834.3_FG005	PF13086
AC190850.3_FG004	PF08263
AC190853.3_FG004	PF13041
AC190859.3_FG006	PF14569
AC190885.4_FG006	PF04525
AC190909.3_FG003	PF04652,PF14288
AC190909.3_FG004	PF02364
AC190915.3_FG007	PF13920
AC190933.3_FG004	PF00582
AC190936.1_FG004	PF08627
AC190981.2_FG007	PF05340
AC190990.2_FG005	PF16900
AC190999.2_FG004	PF00536,PF07522
AC191042.4_FG001	PF13962
AC191048.2_FG006	PF03208
AC191050.3_FG003	PF00190
AC191069.3_FG004	PF09597
AC191071.3_FG001	PF13738
AC191097.3_FG007	PF03188
AC191246.3_FG006	PF12854,PF13812,PF01535
AC191251.3_FG005	PF04078
AC191264.3_FG002	PF13398
AC191272.3_FG003	PF14144
AC191279.2_FG001	PF02365
AC191279.2_FG003	PF02365
AC191283.3_FG004	PF13855,PF08263
AC191287.2_FG001	PF08519
AC191287.2_FG003	PF04937
AC191325.3_FG005	PF00069
AC191330.3_FG009	PF01535
AC191359.3_FG003	PF02892
AC191375.3_FG001	PF05498
AC191379.3_FG002	PF07885
AC191412.3_FG002	PF00118
AC191523.3_FG001	PF04152
AC191524.3_FG007	PF03092
AC191534.3_FG003	PF00097,PF02182
AC191551.3_FG003	PF08541,PF08545
AC191575.2_FG001	PF13419
AC191622.3_FG003	PF03641
AC191623.3_FG007	PF13528
AC191650.3_FG003	PF13639
AC191676.3_FG011	PF00011
AC191748.3_FG001	PF14303
AC191775.4_FG004	PF14700
AC191802.3_FG004	PF03662
AC191961.3_FG009	PF13086
AC192236.3_FG007	PF00931
AC192244.3_FG002	PF00012,PF03360
AC192244.3_FG007	PF01467
AC192251.3_FG001	PF16900
AC192362.3_FG003	PF00164
AC192377.3_FG002	PF00390
AC192451.3_FG001	PF02453
AC192606.3_FG003	PF00098
AC193355.3_FG005	PF05879
AC193362.3_FG002	PF01157
AC193379.3_FG001	PF08263,PF07714
AC193388.3_FG003	PF03000
AC193485.3_FG005	PF00112
AC193500.3_FG003	PF13738,PF00743
AC193576.3_FG003	PF00280
AC193598.3_FG002	PF13855,PF00931
AC193625.3_FG007	PF00005
AC193630.3_FG003	PF03106
AC193632.2_FG002	PF00069
AC193645.3_FG006	PF04578,PF13968
AC193754.3_FG008	PF05188,PF01624,PF05192
AC193767.3_FG003	PF02362
AC193786.3_FG005	PF00010
AC193957.3_FG009	PF01453
AC194017.3_FG001	PF00012
AC194027.3_FG001	PF00141
AC194056.3_FG008	PF05678
AC194069.3_FG003	PF00467,PF00900
AC194074.4_FG003	PF09790
AC194095.3_FG004	PF13963
AC194104.3_FG007	PF08711
AC194112.3_FG001	PF01061
AC194133.3_FG004	PF00281
AC194137.3_FG008	PF04570
AC194163.3_FG001	PF12776
AC194172.3_FG008	PF04857
AC194192.3_FG002	PF00082
AC194203.3_FG003	PF14368
AC194259.3_FG002	PF00258
AC194264.3_FG006	PF06602
AC194289.3_FG004	PF03108
AC194296.3_FG001	PF00623,PF15469
AC194338.3_FG008	PF10294
AC194341.4_FG002	PF04718
AC194341.4_FG003	PF07738
AC194341.4_FG004	PF00646,PF08387
AC194341.4_FG008	PF00091
AC194350.3_FG001	PF00022
AC194362.3_FG003	PF03106
AC194376.3_FG002	PF09790
AC194405.3_FG021	PF13589
AC194442.3_FG004	PF03547
AC194447.3_FG002	PF07890
AC194457.3_FG001	PF07690,PF00083
AC194480.3_FG001	PF00280
AC194480.3_FG003	PF00280
AC194592.2_FG001	PF08241
AC194610.2_FG001	PF01823
AC194628.3_FG003	PF00982
AC194734.3_FG004	PF00504
AC194828.3_FG004	PF06521
AC194852.3_FG007	PF00544,PF04431
AC194852.3_FG010	PF06376
AC194853.1_FG002	PF05129
AC194863.3_FG006	PF03055
AC194886.3_FG015	PF14569
AC194914.3_FG002	PF10604
AC194965.4_FG001	PF01590,PF02518,PF00512
AC194965.4_FG004	PF00320
AC194970.5_FG001	PF00348
AC194970.5_FG002	PF05687
AC194970.5_FG004	PF13320
AC194970.5_FG005	PF03151
AC194970.5_FG009	PF06068
AC194972.2_FG001	PF13912
AC194974.3_FG005	PF00139
AC195059.3_FG003	PF04424
AC195147.3_FG001	PF00651
AC195154.3_FG004	PF01843
AC195172.3_FG001	PF01012,PF00766
AC195207.2_FG002	PF12776
AC195211.3_FG001	PF00900
AC195220.3_FG005	PF02902
AC195220.3_FG007	PF03348
AC195230.2_FG003	PF00069
AC195307.3_FG001	PF16900
AC195319.3_FG001	PF13193,PF03283
AC195323.3_FG011	PF04030
AC195340.3_FG001	PF03953,PF00091
AC195340.3_FG002	PF12838
AC195340.3_FG004	PF02309,PF14383
AC195343.3_FG002	PF00166
AC195349.3_FG005	PF00069
AC195366.3_FG008	PF03371,PF01704
AC195401.3_FG002	PF05770
AC195466.3_FG001	PF08700
AC195580.2_FG010	PF07911
AC195587.4_FG001	PF00319
AC195587.4_FG003	PF04601
AC195587.4_FG004	PF12697,PF00931
AC195587.4_FG005	PF01486
AC195671.2_FG001	PF00743
AC195685.3_FG001	PF12708,PF08423
AC195785.3_FG004	PF08276,PF01453,PF00069
AC195789.3_FG001	PF13371,PF13414
AC195794.3_FG002	PF07883
AC195825.3_FG001	PF01535,PF13041
AC195828.3_FG002	PF00069
AC195833.3_FG001	PF00225
AC195860.3_FG005	PF06747
AC195860.3_FG006	PF00687
AC195864.3_FG017	PF01535
AC195874.2_FG002	PF01217
AC195995.3_FG006	PF12776
AC196008.1_FG004	PF11250
AC196020.3_FG001	PF14291
AC196031.3_FG006	PF00862
AC196037.3_FG001	PF05928
AC196090.3_FG006	PF02225,PF05922,PF00082
AC196135.3_FG006	PF14303
AC196144.3_FG002	PF00467,PF12842,PF16415
AC196161.3_FG002	PF13837
AC196166.3_FG003	PF03096
AC196183.3_FG002	PF07714,PF08276
AC196193.3_FG003	PF02721,PF08646
AC196201.3_FG005	PF04068
AC196278.2_FG003	PF03104
AC196278.2_FG004	PF03104
AC196294.3_FG005	PF01486
AC196412.3_FG001	PF00282
AC196417.3_FG008	PF00304
AC196426.3_FG007	PF05879
AC196436.3_FG002	PF13963
AC196437.3_FG001	PF01282
AC196441.3_FG004	PF00862
AC196465.3_FG002	PF05078
AC196465.3_FG006	PF15613,PF15612,PF05066,PF02791
AC196475.3_FG004	PF08100,PF00891
AC196475.3_FG005	PF02365
AC196489.3_FG002	PF00298,PF03946
AC196502.3_FG003	PF16709,PF16712
AC196502.3_FG006	PF04601
AC196637.2_FG002	PF14432,PF01535,PF13041
AC196686.3_FG001	PF14569
AC196708.3_FG006	PF02519
AC196710.3_FG009	PF05633
AC196711.3_FG003	PF12230
AC196779.3_FG003	PF03767
AC196954.2_FG012	PF03168
AC196961.2_FG003	PF15511
AC196961.2_FG008	PF06972
AC196972.3_FG009	PF13893
AC196978.5_FG007	PF00160
AC197007.3_FG007	PF03662
AC197016.3_FG003	PF03092
AC197029.3_FG003	PF00069
AC197047.3_FG001	PF04570
AC197078.4_FG002	PF00076
AC197095.3_FG004	PF01535,PF13041
AC197118.3_FG005	PF10357
AC197122.3_FG003	PF04065
AC197124.3_FG004	PF06093
AC197143.3_FG007	PF00188
AC197146.3_FG001	PF02724
AC197146.3_FG002	PF00249
AC197150.3_FG003	PF00027,PF00520
AC197164.4_FG002	PF16900
AC197168.3_FG001	PF00202
AC197196.3_FG002	PF01593
AC197242.3_FG001	PF02458
AC197246.3_FG001	PF00025
AC197246.3_FG003	PF01655
AC197333.2_FG001	PF01959
AC197354.3_FG002	PF00072
AC197362.3_FG002	PF00069
AC197364.3_FG007	PF02365
AC197429.3_FG001	PF03514
AC197435.3_FG002	PF09713,PF16969
AC197446.3_FG009	PF00112
AC197498.3_FG002	PF13637
AC197541.3_FG009	PF03283
AC197544.3_FG001	PF00270,PF06045
AC197544.3_FG002	PF02902
AC197555.3_FG007	PF13041,PF01535
AC197555.3_FG008	PF02502
AC197575.3_FG005	PF03572
AC197575.3_FG008	PF00244
AC197577.2_FG002	PF08557
AC197578.4_FG001	PF01915,PF00933
AC197672.3_FG002	PF00364,PF13535,PF02785,PF00289,PF08326,PF01039
AC197699.3_FG001	PF01486
AC197699.3_FG002	PF03055
AC197699.3_FG003	PF04601,PF14226,PF03171
AC197699.3_FG005	PF05129
AC197699.3_FG008	PF05129
AC197699.3_FG009	PF05129
AC197699.3_FG010	PF05129
AC197705.4_FG001	PF02775,PF00205,PF02776
AC197705.4_FG003	PF01161
AC197705.4_FG004	PF13639
AC197705.4_FG006	PF13920
AC197705.4_FG007	PF07244,PF01103
AC197705.4_FG008	PF05097
AC197705.4_FG011	PF01704
AC197714.3_FG005	PF02181
AC197717.3_FG002	PF16136,PF16135,PF07897
AC197718.3_FG002	PF14303
AC197758.3_FG004	PF00141
AC197764.4_FG003	PF06200,PF09425
AC197783.3_FG005	PF02683
AC197910.3_FG001	PF00010
AC197914.2_FG001	PF04727
AC198081.2_FG005	PF13912
AC198118.4_FG002	PF00067
AC198169.4_FG004	PF04851,PF00271
AC198179.4_FG001	PF03372
AC198179.4_FG002	PF03372
AC198206.5_FG001	PF01565,PF04030
AC198206.5_FG002	PF02171
AC198225.4_FG002	PF02148
AC198353.5_FG001	PF00450
AC198353.5_FG004	PF13847,PF01029
AC198361.3_FG004	PF00076
AC198366.3_FG004	PF03514
AC198380.3_FG001	PF00759
AC198398.3_FG005	PF07714
AC198403.3_FG001	PF00847
AC198418.3_FG005	PF04851,PF00098,PF08152,PF00271
AC198476.3_FG004	PF02892
AC198481.3_FG004	PF02259,PF00454
AC198506.3_FG001	PF13912
AC198509.3_FG004	PF06916
AC198515.3_FG011	PF03169
AC198518.3_FG002	PF00536
AC198518.3_FG003	PF15249
AC198518.3_FG005	PF00010
AC198597.4_FG001	PF00141,PF14009
AC198699.3_FG004	PF01070,PF04078
AC198700.2_FG004	PF00854
AC198725.4_FG004	PF04844
AC198725.4_FG007	PF12717,PF09066,PF01602
AC198725.4_FG009	PF03106
AC198731.3_FG004	PF01535
AC198743.3_FG008	PF13041
AC198749.3_FG004	PF01208
AC198937.4_FG002	PF14569
AC198937.4_FG005	PF02365
AC198971.3_FG006	PF02866
AC198979.4_FG009	PF00847
AC199001.3_FG005	PF16486,PF12764
AC199039.3_FG003	PF00076
AC199067.2_FG004	PF04520
AC199068.2_FG017	PF00931
AC199175.2_FG003	PF04646
AC199175.2_FG006	PF01776
AC199198.3_FG005	PF07651
AC199314.3_FG002	PF02892
AC199315.4_FG001	PF03911
AC199343.3_FG013	PF00462
AC199363.4_FG003	PF13414
AC199379.4_FG001	PF16900
AC199439.4_FG005	PF00069,PF00012
AC199487.4_FG002	PF00280
AC199487.4_FG003	PF00280
AC199487.4_FG004	PF00280
AC199488.4_FG003	PF00280
AC199488.4_FG004	PF00280
AC199526.5_FG002	PF00438,PF02772,PF02773
AC199526.5_FG003	PF01985
AC199541.4_FG001	PF00201
AC199541.4_FG002	PF00201
AC199541.4_FG004	PF00201
AC199541.4_FG007	PF00201
AC199543.4_FG004	PF07762
AC199571.3_FG004	PF00085
AC199572.3_FG001	PF07714
AC199701.4_FG001	PF03004
AC199765.4_FG008	PF00759
AC199771.4_FG001	PF08137
AC199782.5_FG001	PF01656
AC199782.5_FG002	PF01154,PF08540
AC199782.5_FG003	PF03634
AC199810.3_FG003	PF00069
AC199820.4_FG006	PF00249
AC199826.4_FG003	PF00989
AC199884.4_FG007	PF01416,PF03141
AC199908.4_FG002	PF01301
AC199908.4_FG003	PF01564
AC199911.5_FG001	PF01813
AC199917.4_FG003	PF07714
AC200057.4_FG006	PF14303
AC200057.4_FG007	PF00170
AC200099.4_FG006	PF00067
AC200101.4_FG002	PF00012
AC200108.4_FG003	PF06814
AC200112.4_FG007	PF12678
AC200124.3_FG005	PF03514
AC200210.1_FG006	PF00675
AC200211.3_FG008	PF00069
AC200298.4_FG001	PF00403
AC200321.3_FG004	PF02453
AC200493.4_FG001	PF16712
AC200745.4_FG007	PF14363
AC200753.3_FG003	PF00168,PF08372
AC201815.4_FG001	PF01535,PF13041
AC201832.3_FG006	PF00808
AC201894.4_FG007	PF01504
AC202011.3_FG010	PF03087
AC202069.3_FG002	PF00067
AC202073.4_FG001	PF07887
AC202110.3_FG004	PF00005
AC202120.3_FG003	PF09180
AC202132.4_FG002	PF03619
AC202139.3_FG008	PF00270
AC202158.3_FG002	PF16113
AC202172.3_FG004	PF00304
AC202179.3_FG005	PF13041
AC202181.3_FG003	PF13087
AC202185.4_FG004	PF00011
AC202386.3_FG002	PF04053,PF06957
AC202391.4_FG002	PF00098
AC202435.3_FG001	PF08238
AC202435.3_FG003	PF00149
AC202439.3_FG006	PF00474
AC202561.3_FG009	PF00067
AC202707.3_FG002	PF01088
AC202855.3_FG004	PF04535
AC202864.3_FG002	PF00320
AC202867.3_FG008	PF00403
AC202895.3_FG002	PF06733
AC202915.3_FG002	PF00300
AC202974.3_FG004	PF03168
AC203019.3_FG001	PF00337
AC203031.3_FG002	PF08612
AC203041.3_FG005	PF00141
AC203049.3_FG002	PF14570
AC203051.3_FG003	PF08392
AC203159.3_FG010	PF02298
AC203173.3_FG001	PF13178,PF00612
AC203173.3_FG002	PF08263,PF00560,PF00069,PF13855
AC203173.3_FG004	PF14492,PF03144,PF00679,PF03764,PF00009
AC203227.3_FG001	PF04759
AC203257.2_FG003	PF12678
AC203262.3_FG002	PF04398
AC203280.3_FG001	PF00076
AC203294.3_FG001	PF13499,PF07714
AC203294.3_FG012	PF05678
AC203324.3_FG010	PF13912
AC203334.2_FG001	PF00892
AC203352.3_FG001	PF04107
AC203362.4_FG012	PF01095
AC203408.4_FG003	PF00759
AC203423.3_FG009	PF14111
AC203424.3_FG001	PF07774
AC203535.4_FG001	PF13921,PF11831
AC203535.4_FG002	PF02365
AC203535.4_FG004	PF13806
AC203535.4_FG007	PF07714
AC203535.4_FG009	PF04545
AC203570.4_FG005	PF00855
AC203581.4_FG001	PF00190
AC203752.5_FG002	PF00133
AC203753.4_FG006	PF01055
AC203754.4_FG008	PF00696
AC203761.3_FG002	PF01751,PF01131
AC203768.3_FG005	PF01435
AC203810.4_FG002	PF14695
AC203841.3_FG002	PF14432,PF01535,PF13041
AC203841.3_FG009	PF04080
AC203862.4_FG001	PF01650
AC203862.4_FG002	PF00855
AC203865.3_FG001	PF03638
AC203900.3_FG006	PF13855
AC203909.3_FG003	PF08031,PF01565
AC203909.3_FG007	PF08031,PF01565
AC203955.3_FG005	PF07466
AC203956.3_FG004	PF05697
AC203957.3_FG004	PF00170
AC203966.5_FG003	PF03629
AC203966.5_FG005	PF14226,PF03171
AC203966.5_FG006	PF00232
AC203967.4_FG004	PF00675
AC203971.3_FG005	PF13962
AC203972.3_FG001	PF00931
AC203972.3_FG002	PF07714
AC203985.4_FG001	PF07690
AC203985.4_FG005	PF01920
AC203989.4_FG001	PF07847
AC204000.2_FG001	PF14569
AC204007.3_FG001	PF12695
AC204050.4_FG006	PF14531
AC204070.3_FG004	PF00063
AC204212.4_FG001	PF00249
AC204277.3_FG006	PF03141
AC204292.4_FG002	PF14432,PF01535,PF13041
AC204292.4_FG003	PF00168
AC204292.4_FG006	PF05922,PF00082
AC204301.3_FG002	PF11250
AC204306.3_FG007	PF13639
AC204359.3_FG005	PF03151
AC204382.3_FG010	PF01486
AC204407.3_FG004	PF00931
AC204437.3_FG004	PF10294
AC204472.3_FG002	PF13532
AC204502.4_FG006	PF13724,PF04844
AC204512.3_FG002	PF00847
AC204515.4_FG006	PF04578,PF13968
AC204530.4_FG002	PF08637
AC204530.4_FG003	PF00191
AC204530.4_FG006	PF01504,PF02493
AC204539.4_FG003	PF00235
AC204563.3_FG011	PF14932
AC204591.3_FG002	PF02704
AC204621.4_FG006	PF03514
AC204625.4_FG001	PF08541
AC204641.5_FG001	PF01344,PF13041
AC204641.5_FG003	PF02902
AC204659.3_FG005	PF02840
AC204711.3_FG002	PF00331
AC204711.3_FG003	PF00581
AC204717.3_FG005	PF12776
AC204763.2_FG001	PF13855
AC204868.3_FG004	PF12937
AC204940.3_FG008	PF07651
AC205006.3_FG001	PF00941,PF03450
AC205008.4_FG002	PF12710,PF00122
AC205012.3_FG002	PF00240,PF00454
AC205057.3_FG002	PF05910
AC205057.3_FG004	PF08646,PF16900
AC205113.3_FG001	PF02319
AC205122.4_FG003	PF12907,PF00168
AC205122.4_FG006	PF04578,PF13968
AC205130.3_FG001	PF00281
AC205154.3_FG005	PF00141
AC205250.3_FG004	PF13912
AC205250.3_FG006	PF03018
AC205251.3_FG002	PF12678
AC205274.3_FG001	PF00188
AC205320.3_FG004	PF07802
AC205324.3_FG003	PF14111
AC205362.4_FG002	PF01490
AC205376.4_FG003	PF02341
AC205376.4_FG007	PF01535
AC205376.4_FG008	PF14303
AC205410.3_FG001	PF14416
AC205413.4_FG001	PF00141
AC205413.4_FG002	PF00141
AC205413.4_FG003	PF00141
AC205419.3_FG001	PF05911
AC205471.4_FG003	PF00447
AC205471.4_FG004	PF03098
AC205471.4_FG007	PF04520
AC205471.4_FG008	PF00560,PF13855
AC205500.3_FG002	PF01535
AC205502.4_FG004	PF01397,PF03936
AC205530.4_FG003	PF14303
AC205562.3_FG002	PF03106
AC205574.3_FG006	PF03634
AC205595.3_FG007	PF01657
AC205608.4_FG004	PF00854
AC205616.4_FG002	PF03108
AC205661.3_FG002	PF16050
AC205677.3_FG001	PF14796,PF01602
AC205703.4_FG001	PF00240
AC205703.4_FG002	PF00022
AC205703.4_FG006	PF13561
AC205725.3_FG010	PF03715
AC205728.3_FG001	PF04181
AC205735.3_FG006	PF13041
AC205838.3_FG005	PF03004
AC205886.3_FG001	PF00900
AC205909.3_FG001	PF00931
AC205976.3_FG004	PF13639
AC206030.4_FG001	PF01554
AC206165.3_FG007	PF00447
AC206175.3_FG003	PF00501
AC206184.4_FG002	PF03073
AC206185.3_FG002	PF16363
AC206191.3_FG001	PF05142
AC206201.3_FG004	PF00425
AC206217.2_FG006	PF13912
AC206223.3_FG004	PF03770,PF00400,PF00650
AC206223.3_FG006	PF00069
AC206223.3_FG007	PF13837
AC206223.3_FG008	PF13176,PF07719,PF13414
AC206246.3_FG003	PF03790,PF03791
AC206259.3_FG003	PF14649
AC206266.3_FG001	PF00005,PF00664
AC206266.3_FG005	PF03478
AC206274.3_FG007	PF02181,PF00249
AC206326.3_FG004	PF14111
AC206332.3_FG005	PF00337,PF01762
AC206350.3_FG005	PF03018
AC206425.3_FG004	PF00069
AC206432.3_FG005	PF04782
AC206627.3_FG001	PF00225
AC206634.3_FG004	PF13855,PF00071
AC206638.3_FG007	PF05678
AC206642.4_FG001	PF00831
AC206764.4_FG001	PF13041
AC206764.4_FG004	PF03055
AC206768.3_FG005	PF13639
AC206780.3_FG004	PF00098
AC206788.3_FG015	PF00201
AC206790.3_FG001	PF01073
AC206831.3_FG015	PF00560
AC206845.3_FG004	PF00394
AC206856.3_FG003	PF11904
AC206901.3_FG005	PF00249
AC206941.2_FG002	PF01277
AC206951.3_FG016	PF00847
AC206951.3_FG017	PF00847
AC206968.3_FG003	PF01399
AC206999.1_FG007	PF00280
AC207008.3_FG005	PF04733
AC207019.3_FG003	PF12819
AC207043.3_FG002	PF05678
AC207043.3_FG004	PF14008,PF00149
AC207107.4_FG002	PF06102
AC207265.3_FG002	PF07651
AC207266.3_FG002	PF14569
AC207309.3_FG005	PF01163
AC207323.3_FG015	PF00982
AC207342.3_FG001	PF02042
AC207342.3_FG007	PF13474
AC207342.3_FG008	PF10539
AC207347.3_FG005	PF07690,PF00083
AC207392.3_FG001	PF03080
AC207546.3_FG004	PF04504
AC207628.4_FG002	PF13178
AC207628.4_FG003	PF13041,PF01535,PF00314,PF14432,PF12110
AC207628.4_FG005	PF01459
AC207628.4_FG009	PF03372
AC207628.4_FG010	PF08241
AC207628.4_FG011	PF00612,PF13178
AC207652.3_FG001	PF07719,PF13414
AC207655.2_FG002	PF01138
AC207656.3_FG002	PF02362,PF06507
AC207678.4_FG002	PF02847,PF16211,PF00125
AC207722.2_FG009	PF00504
AC207728.2_FG003	PF04802
AC207733.3_FG001	PF03108
AC207733.3_FG007	PF07762
AC207743.3_FG001	PF00281
AC207755.3_FG004	PF03398
AC207755.3_FG005	PF00324
AC207814.3_FG002	PF07762
AC207814.3_FG003	PF01852
AC207880.3_FG002	PF00006
AC207888.3_FG009	PF03195
AC207890.3_FG002	PF00567,PF00565
AC208023.3_FG001	PF00584
AC208026.3_FG005	PF16900
AC208110.2_FG001	PF03106
AC208110.2_FG005	PF00854
AC208110.2_FG011	PF00854
AC208126.3_FG001	PF00304
AC208201.3_FG001	PF00153
AC208201.3_FG002	PF00481
AC208201.3_FG003	PF14416,PF13839
AC208204.3_FG006	PF00011
AC208221.3_FG002	PF00228
AC208236.3_FG003	PF14303
AC208327.4_FG003	PF12265,PF00400
AC208327.4_FG006	PF02485
AC208337.2_FG003	PF00164
AC208341.4_FG005	PF00169
AC208341.4_FG007	PF00141
AC208341.4_FG008	PF03803
AC208346.3_FG004	PF03081
AC208348.3_FG012	PF13812,PF13041,PF01535
AC208358.3_FG005	PF04484
AC208406.3_FG002	PF01593
AC208411.3_FG013	PF00112
AC208418.3_FG009	PF14541,PF07779,PF03081
AC208422.3_FG001	PF07574
AC208422.3_FG002	PF07574
AC208436.3_FG007	PF05641
AC208440.3_FG003	PF07814
AC208440.3_FG004	PF00628
AC208445.3_FG001	PF00280
AC208445.3_FG006	PF00280
AC208521.3_FG002	PF12165
AC208545.3_FG004	PF14569
AC208559.3_FG003	PF13417
AC208564.3_FG004	PF01486
AC208608.3_FG001	PF06813
AC208641.3_FG005	PF00909
AC208641.3_FG008	PF00909
AC208663.3_FG002	PF02365
AC208665.3_FG004	PF06421
AC208717.4_FG005	PF14303
AC208838.3_FG002	PF05770
AC208860.3_FG002	PF07714
AC208892.3_FG005	PF05755
AC208897.3_FG004	PF07690,PF00083
AC208915.3_FG010	PF00504
AC208985.3_FG006	PF02298
AC209019.3_FG003	PF00270
AC209050.3_FG001	PF00690,PF00702,PF00122
AC209050.3_FG003	PF03106
AC209073.3_FG002	PF03004
AC209075.3_FG007	PF04783
AC209169.3_FG007	PF00406
AC209206.3_FG004	PF05097
AC209206.3_FG011	PF16487,PF16488,PF08699,PF16486,PF02170,PF12764,PF02171
AC209206.3_FG014	PF12142,PF00264,PF12143
AC209208.3_FG001	PF00069
AC209208.3_FG002	PF00230
AC209208.3_FG003	PF05922,PF02225,PF00082
AC209215.4_FG004	PF01459
AC209215.4_FG006	PF03501
AC209242.3_FG003	PF01650
AC209247.4_FG001	PF13371,PF13414
AC209249.2_FG015	PF00481
AC209257.4_FG003	PF00462
AC209257.4_FG006	PF00847
AC209257.4_FG008	PF03208
AC209332.3_FG011	PF02892
AC209374.4_FG002	PF02542
AC209374.4_FG007	PF14008,PF00149
AC209377.3_FG003	PF04398
AC209381.3_FG002	PF13639
AC209381.3_FG007	PF13639
AC209381.3_FG008	PF13639
AC209403.3_FG005	PF14432
AC209434.4_FG001	PF00722
AC209621.2_FG002	PF13417
AC209626.2_FG013	PF02602
AC209636.2_FG003	PF12695
AC209664.3_FG002	PF01501
AC209710.4_FG002	PF06102
AC209718.1_FG009	PF13041,PF01535
AC209739.3_FG003	PF00168
AC209744.3_FG001	PF00582
AC209765.3_FG001	PF00280
AC209765.3_FG002	PF00280
AC209768.3_FG005	PF04857
AC209768.3_FG016	PF00743
AC209784.3_FG007	PF00012
AC209784.3_FG011	PF02469,PF13837
AC209810.3_FG002	PF08246,PF00112
AC209819.3_FG003	PF10252
AC209819.3_FG005	PF08100,PF00891
AC209819.3_FG007	PF00400
AC209819.3_FG009	PF02701
AC209819.3_FG012	PF08477
AC209835.4_FG004	PF04752
AC209845.4_FG010	PF03479
AC209853.2_FG001	PF00067
AC209858.4_FG002	PF04003,PF00400
AC209858.4_FG004	PF00583
AC209860.3_FG002	PF00133
AC209860.3_FG004	PF03446
AC209946.4_FG001	PF02902
AC209962.3_FG004	PF05703
AC209971.4_FG003	PF14368
AC209972.4_FG005	PF07714
AC209987.4_FG002	PF00067
AC209987.4_FG004	PF03175
AC209987.4_FG010	PF02298
AC210001.3_FG001	PF04424
AC210003.2_FG004	PF00141
AC210005.3_FG001	PF00069
AC210010.4_FG008	PF12110
AC210013.4_FG002	PF02298
AC210013.4_FG003	PF08241,PF08498
AC210013.4_FG005	PF01715
AC210013.4_FG006	PF00106
AC210013.4_FG008	PF07817
AC210013.4_FG011	PF07228
AC210013.4_FG012	PF03798
AC210013.4_FG013	PF13934,PF11955
AC210013.4_FG014	PF07714,PF13499
AC210013.4_FG017	PF00295
AC210013.4_FG018	PF02341
AC210013.4_FG019	PF03719,PF00333
AC210023.3_FG014	PF00654
AC210067.3_FG005	PF00076
AC210168.4_FG003	PF00314
AC210169.3_FG002	PF01535,PF13041
AC210173.4_FG002	PF02201,PF03126
AC210173.4_FG005	PF00067
AC210202.3_FG007	PF00069
AC210204.3_FG002	PF00168
AC210205.3_FG002	PF04783
AC210231.3_FG004	PF14291
AC210266.3_FG001	PF13632
AC210314.3_FG006	PF10961
AC210379.2_FG006	PF00743
AC210410.3_FG004	PF00403
AC210517.3_FG003	PF00011
AC210595.3_FG004	PF05558
AC210596.3_FG003	PF13947
AC210596.3_FG004	PF07645,PF00069
AC210598.3_FG003	PF09328,PF05023
AC210607.3_FG005	PF00026
AC210616.4_FG003	PF07690
AC210616.4_FG005	PF04873
AC210669.3_FG001	PF06955,PF00722
AC210721.4_FG014	PF12854
AC210724.2_FG007	PF02902
AC210792.5_FG001	PF00056
AC210792.5_FG003	PF01191
AC210816.3_FG005	PF03635
AC210848.3_FG006	PF00481
AC210892.4_FG006	PF14009
AC210976.4_FG017	PF16113
AC211152.4_FG007	PF04601
AC211164.5_FG001	PF01061
AC211164.5_FG004	PF00141
AC211175.3_FG005	PF00069
AC211190.4_FG002	PF00931
AC211190.4_FG004	PF05057,PF13639
AC211192.3_FG003	PF00154
AC211276.4_FG008	PF02485
AC211327.4_FG006	PF02171
AC211349.4_FG001	PF03147,PF01409
AC211349.4_FG002	PF00091
AC211357.4_FG002	PF00188
AC211357.4_FG004	PF00472,PF03462
AC211390.3_FG001	PF03141
AC211394.4_FG004	PF14008,PF16656,PF00149
AC211474.3_FG006	PF10250
AC211478.3_FG004	PF02365
AC211504.4_FG003	PF12695
AC211651.4_FG001	PF00012
AC211652.4_FG002	PF00498
AC211652.4_FG003	PF00704
AC211702.2_FG002	PF13912
AC211704.3_FG003	PF00909
AC211737.3_FG012	PF00082
AC211738.4_FG005	PF00112
AC211756.4_FG001	PF13912
AC211887.3_FG004	PF13499
AC211887.3_FG007	PF13499
AC211891.4_FG001	PF13912
AC211891.4_FG003	PF03407
AC211913.3_FG001	PF07741
AC211940.4_FG001	PF00098
AC211965.4_FG003	PF00817
AC211995.4_FG004	PF00046
AC211996.4_FG002	PF00304
AC212015.4_FG003	PF14309
AC212023.4_FG004	PF04043
AC212035.3_FG008	PF08238
AC212040.2_FG002	PF13738
AC212068.4_FG005	PF00657
AC212112.4_FG002	PF13180,PF13365
AC212184.3_FG010	PF00827
AC212219.3_FG005	PF14226,PF03171
AC212227.3_FG006	PF01269
AC212244.4_FG004	PF05910
AC212343.3_FG002	PF04535
AC212353.4_FG004	PF13639
AC212353.4_FG006	PF00450
AC212361.3_FG010	PF16363
AC212394.4_FG010	PF00069,PF06813
AC212404.3_FG006	PF01055
AC212447.3_FG001	PF03017
AC212449.4_FG001	PF02984,PF00134
AC212449.4_FG002	PF00134,PF02984
AC212449.4_FG004	PF02984,PF00134
AC212449.4_FG006	PF00134,PF02984
AC212451.4_FG009	PF01095
AC212565.3_FG001	PF15511
AC212570.3_FG006	PF00400,PF09384
AC212667.3_FG005	PF16363
AC212684.3_FG012	PF13812,PF01535
AC212728.3_FG001	PF00228
AC212755.4_FG001	PF03168
AC212823.4_FG003	PF00069,PF00368,PF00319
AC212835.3_FG001	PF13041
AC212835.3_FG002	PF02298
AC212835.3_FG007	PF09412
AC212835.3_FG008	PF00069
AC212859.3_FG004	PF03016
AC212859.3_FG008	PF02365
AC212976.3_FG003	PF13639
AC212978.4_FG005	PF02458
AC212979.2_FG006	PF00013
AC213050.3_FG001	PF01348
AC213094.3_FG003	PF00481
AC213099.3_FG001	PF03692
AC213099.3_FG002	PF04305
AC213398.3_FG002	PF01593
AC213398.3_FG004	PF12579
AC213432.2_FG004	PF04043
AC213455.3_FG008	PF02163
AC213463.3_FG002	PF09816
AC213463.3_FG006	PF07059
AC213463.3_FG007	PF04398
AC213463.3_FG009	PF06136
AC213521.3_FG005	PF03807,PF00745,PF05201
AC213524.3_FG003	PF03634
AC213592.2_FG002	PF14288
AC213600.3_FG002	PF13015,PF12999
AC213612.3_FG002	PF00467
AC213615.3_FG001	PF00076
AC213621.5_FG002	PF10250
AC213621.5_FG004	PF02469
AC213629.3_FG002	PF14291
AC213654.3_FG001	PF14369,PF13639
AC213654.3_FG004	PF12937
AC213666.3_FG003	PF00847
AC213668.4_FG005	PF13041
AC213693.3_FG003	PF00365
AC213769.3_FG001	PF00931
AC213803.3_FG016	PF07000
AC213847.4_FG008	PF05928
AC213857.4_FG003	PF13833
AC213884.3_FG001	PF00638
AC213884.3_FG002	PF00249
AC213884.3_FG006	PF06886
AC213890.4_FG004	PF00069
AC213896.2_FG005	PF00134
AC213985.2_FG007	PF01535
AC214040.3_FG009	PF07714,PF00139
AC214046.4_FG005	PF01988
AC214119.3_FG009	PF14500,PF12460
AC214138.3_FG007	PF08323
AC214168.3_FG001	PF02319,PF16421
AC214227.4_FG013	PF13639
AC214256.3_FG005	PF00161
AC214266.3_FG002	PF04142
AC214350.3_FG007	PF00355,PF02921
AC214352.2_FG008	PF13041
AC214360.3_FG001	PF01397,PF03936
AC214448.3_FG007	PF06814
AC214484.3_FG001	PF00689
AC214507.3_FG001	PF01985
AC214524.3_FG002	PF00067
AC214534.3_FG010	PF12854,PF13812,PF01535
AC214602.3_FG012	PF13855
AC214613.3_FG003	PF14111
AC214635.3_FG002	PF12937,PF01344
AC214640.3_FG003	PF00312
AC214648.3_FG001	PF00855
AC214648.3_FG003	PF00335
AC214648.3_FG005	PF03195
AC214743.3_FG001	PF07714
AC214743.3_FG002	PF00069
AC214771.3_FG002	PF13639
AC214771.3_FG003	PF02485
AC214791.2_FG002	PF01161
AC214817.3_FG004	PF08263,PF00560,PF13855,PF07714
AC214817.3_FG007	PF12819
AC215181.3_FG003	PF01061
AC215181.3_FG004	PF07714
AC215198.3_FG002	PF14432,PF01535,PF13041
AC215201.3_FG003	PF07714
AC215201.3_FG005	PF00118
AC215231.3_FG003	PF14569
AC215244.3_FG002	PF12796
AC215249.3_FG007	PF00176
AC215260.3_FG001	PF03018
AC215260.3_FG003	PF02458
AC215260.3_FG004	PF03737
AC215290.3_FG002	PF13912
AC215300.3_FG006	PF00026
AC215311.3_FG002	PF00076
AC215608.3_FG001	PF00385
AC215639.3_FG002	PF14226,PF03171
AC215678.3_FG008	PF03169
AC215690.3_FG002	PF03405
AC215723.3_FG001	PF13041
AC215811.3_FG003	PF06203
AC215864.3_FG010	PF01215
AC215909.3_FG001	PF00847
AC215994.3_FG003	PF00650
AC216010.3_FG001	PF01416
AC216045.2_FG005	PF09187
AC216067.3_FG002	PF00137
AC216188.3_FG007	PF14303
AC216219.3_FG006	PF01434
AC216235.2_FG010	PF01535
AC216247.3_FG001	PF00447
AC216247.3_FG005	PF00254
AC216253.3_FG005	PF01918
AC216264.3_FG001	PF00450
AC216353.2_FG005	PF00719
AC216369.3_FG002	PF00067
AC216731.3_FG001	PF00010
AC216731.3_FG002	PF00999
AC216793.3_FG008	PF16913
AC216869.3_FG001	PF01704
AC216871.3_FG001	PF04577
AC216871.3_FG004	PF04577
AC216872.3_FG002	PF13900
AC216886.3_FG001	PF14416,PF13839
AC216886.3_FG002	PF14416,PF13839
AC216886.3_FG003	PF14416,PF13839
AC216887.3_FG005	PF00098
AC216889.3_FG008	PF16211
AC217043.3_FG002	PF00270,PF01918
AC217043.3_FG007	PF02171
AC217050.4_FG001	PF13540,PF00415
AC217050.4_FG004	PF01426
AC217050.4_FG006	PF00244
AC217050.4_FG007	PF01397,PF03936
AC217051.3_FG006	PF01161
AC217121.3_FG007	PF01545
AC217255.3_FG002	PF07714
AC217263.3_FG007	PF04398
AC217264.3_FG001	PF01429
AC217264.3_FG002	PF00012
AC217264.3_FG005	PF00249
AC217271.3_FG001	PF13902
AC217271.3_FG002	PF06991
AC217280.3_FG001	PF04783
AC217288.3_FG005	PF03790,PF03791
AC217293.3_FG002	PF00931
AC217293.3_FG005	PF13962,PF12796
AC217293.3_FG007	PF13947,PF07714
AC217300.3_FG004	PF07714
AC217300.3_FG005	PF00466
AC217311.3_FG007	PF00085,PF07749
AC217348.4_FG004	PF00044
AC217358.3_FG002	PF00931
AC217358.3_FG003	PF01866
AC217358.3_FG005	PF01145
AC217358.3_FG007	PF00106
AC217358.3_FG008	PF00025
AC217358.3_FG009	PF00025
AC217358.3_FG010	PF05991
AC217358.3_FG011	PF03839
AC217358.3_FG013	PF10475,PF13365
AC217401.3_FG001	PF00232
AC217401.3_FG002	PF00232
AC217401.3_FG003	PF08263,PF00069
AC217401.3_FG004	PF02791
AC217415.3_FG004	PF11250
AC217499.3_FG001	PF10998
AC217499.3_FG003	PF06549
AC217528.3_FG001	PF13041,PF01535
AC217553.3_FG008	PF05183
AC217553.3_FG009	PF05183
AC217556.3_FG003	PF14259,PF00076
AC217558.3_FG001	PF06102
AC217665.3_FG005	PF01926
AC217811.3_FG003	PF00282
AC217840.3_FG001	PF09348
AC217842.3_FG001	PF07714,PF00069
AC217887.3_FG001	PF07228
AC217887.3_FG003	PF13639
AC217887.3_FG004	PF07983,PF00332
AC217887.3_FG005	PF00400
AC217897.3_FG010	PF06127
AC217910.3_FG001	PF00403
AC217910.3_FG004	PF05553
AC217910.3_FG006	PF03195
AC217947.4_FG002	PF00175,PF00258,PF00667
AC217966.3_FG007	PF02984
AC217975.3_FG001	PF02518,PF10436
AC217977.3_FG001	PF04526
AC217977.3_FG003	PF01521
AC218002.3_FG001	PF04504
AC218035.3_FG004	PF04884
AC218148.2_FG008	PF01535,PF13041
AC218457.2_FG008	PF05498
AC218457.2_FG013	PF00439
AC218900.3_FG001	PF12695
AC218932.3_FG009	PF08711
AC218939.2_FG004	PF00069
AC218959.1_FG001	PF13202
AC218972.3_FG001	PF00069
AC218972.3_FG002	PF11331
AC218972.3_FG004	PF00560,PF08263,PF07714
AC218972.3_FG007	PF16544
AC218973.3_FG003	PF03195
AC218980.3_FG002	PF03140
AC218988.3_FG003	PF14541,PF07779,PF03081
AC218998.2_FG001	PF00067
AC218998.2_FG003	PF01535,PF13041
AC218998.2_FG007	PF00069,PF01419
AC218998.2_FG011	PF03936,PF01397
AC219006.2_FG006	PF08449
AC219006.2_FG007	PF13481
AC219020.4_FG002	PF00249
AC219190.3_FG002	PF03330,PF01357
AC220927.3_FG007	PF04674
AC220927.3_FG010	PF04515
AC220970.4_FG001	PF12711,PF00225
AC220970.4_FG002	PF14389,PF04784
AC220972.3_FG001	PF13639
AC220999.3_FG008	PF14291
AC225128.2_FG001	PF13839
AC225147.4_FG002	PF00164
AC225147.4_FG003	PF00628,PF12165
AC225176.2_FG006	PF00271,PF12513
AC225179.3_FG003	PF12937
AC225185.3_FG002	PF02889
AC225185.3_FG004	PF05701
AC225193.3_FG001	PF13837
AC225193.3_FG003	PF03479
AC225205.3_FG003	PF00454
AC225222.2_FG004	PF00280
AC225309.2_FG003	PF02790
AC225342.3_FG001	PF01781,PF03110
AC225363.3_FG004	PF07714
AC225365.3_FG004	PF01509
AC225555.3_FG005	PF15491
AC225564.3_FG003	PF13920
AC225716.2_FG003	PF08246,PF00112
AC225716.2_FG004	PF00112
AC225716.2_FG006	PF00112
AC225718.2_FG004	PF13456
AC225718.2_FG006	PF13833
AC225718.2_FG009	PF12609
AC226221.2_FG011	PF00462
AC226227.2_FG004	PF13832
AC226227.2_FG005	PF03140
AC226227.2_FG007	PF01412
AC226227.2_FG009	PF04842
AC226230.2_FG001	PF10374,PF10373
AC226235.2_FG001	PF01073
AC226248.1_FG002	PF00069
AC226323.2_FG001	PF01749
AC226368.2_FG006	PF01535,PF13041
AC226552.2_FG001	PF08312
AC226552.2_FG002	PF08312
AC226723.2_FG001	PF00390
AC229978.2_FG002	PF05664
AC230011.2_FG002	PF00931
AC230013.2_FG002	PF00141
AC230013.2_FG007	PF01775
AC230017.2_FG008	PF00646
AC230017.2_FG009	PF12937
AC230023.2_FG002	PF08711
AC230023.2_FG003	PF08711
AC230023.2_FG004	PF08711
AC231180.2_FG001	PF04434,PF10551
AC231180.2_FG006	PF12708
AC231411.1_FG011	PF01764
AC231426.1_FG002	PF01095
AC231745.1_FG003	PF00657
AC231747.1_FG001	PF12451,PF00637
AC232238.2_FG004	PF00170,PF14144
AC232238.2_FG005	PF00111
AC232289.2_FG003	PF02201
AC232289.2_FG008	PF06813
AC232393.1_FG009	PF13041
AC233751.1_FG002	PF03110
AC233785.2_FG005	PF08711
AC233788.2_FG001	PF00664
AC233850.1_FG002	PF04043
AC233850.1_FG003	PF04043
AC233850.1_FG005	PF02319,PF16421
AC233851.1_FG011	PF00544
AC233851.1_FG014	PF01535,PF13041
AC233851.1_FG016	PF07731
AC233851.1_FG017	PF12142,PF00264,PF12143
AC233853.1_FG002	PF00170
AC233853.1_FG003	PF00067
AC233854.1_FG002	PF14363,PF00004
AC233855.1_FG006	PF00557
AC233859.1_FG001	PF00069
AC233861.1_FG001	PF08263,PF00069,PF13855
AC233864.1_FG010	PF00069
AC233864.1_FG012	PF07714
AC233864.1_FG014	PF04765
AC233865.1_FG001	PF15511
AC233865.1_FG003	PF02365
AC233865.1_FG004	PF04564
AC233866.1_FG006	PF03144,PF03143,PF00009
AC233867.1_FG004	PF00076
AC233870.1_FG006	PF16550
AC233871.1_FG003	PF13499,PF07714
AC233871.1_FG005	PF07714
AC233871.1_FG008	PF00642
AC233872.1_FG003	PF02330
AC233878.1_FG004	PF00122,PF13246,PF00689
AC233879.1_FG002	PF00477
AC233880.1_FG004	PF13014
AC233880.1_FG005	PF03479
AC233880.1_FG006	PF02042
AC233880.1_FG009	PF01282
AC233881.1_FG006	PF01357
AC233882.1_FG003	PF00005,PF00664
AC233882.1_FG005	PF07885
AC233883.1_FG006	PF03140
AC233885.1_FG001	PF04576
AC233887.1_FG005	PF11744
AC233887.1_FG006	PF13692
AC233888.1_FG001	PF08458,PF05703
AC233888.1_FG002	PF00643,PF06203
AC233892.1_FG001	PF13041
AC233893.1_FG003	PF08541,PF08392
AC233893.1_FG006	PF08263,PF00069
AC233894.1_FG004	PF12014
AC233895.1_FG001	PF00557
AC233898.1_FG004	PF10250
AC233899.1_FG002	PF00010
AC233899.1_FG004	PF02183,PF00046
AC233900.1_FG002	PF07883
AC233901.1_FG005	PF05383
AC233901.1_FG008	PF01357,PF03330
AC233904.1_FG003	PF02902,PF13087
AC233910.1_FG001	PF00153
AC233910.1_FG003	PF00240,PF01020
AC233910.1_FG004	PF13920
AC233910.1_FG010	PF00069
AC233912.1_FG001	PF01486,PF00319
AC233916.1_FG002	PF01764
AC233922.1_FG003	PF00171
AC233922.1_FG005	PF00763,PF02882
AC233922.1_FG008	PF00179
AC233926.1_FG002	PF14368
AC233933.1_FG001	PF00847
AC233935.1_FG005	PF02701
AC233939.1_FG003	PF04641,PF15906
AC233939.1_FG004	PF09713
AC233940.1_FG003	PF00450
AC233942.1_FG001	PF00646
AC233943.1_FG002	PF03195
AC233945.1_FG003	PF01554
AC233946.1_FG004	PF06203
AC233949.1_FG004	PF02933,PF07724,PF05496,PF02359
AC233950.1_FG002	PF03634
AC233952.1_FG004	PF12776
AC233952.1_FG008	PF13912
AC233953.1_FG004	PF00069
AC233953.1_FG005	PF02705
AC233954.1_FG004	PF04062
AC233955.1_FG003	PF03059
AC233955.1_FG009	PF14416,PF13839
AC233959.1_FG004	PF09739
AC233959.1_FG006	PF07839
AC233960.1_FG002	PF01786
AC233960.1_FG003	PF00249,PF14379
AC233960.1_FG005	PF00010
AC233961.1_FG001	PF05033,PF00856,PF02182
AC233966.1_FG001	PF03209,PF06813
AC233966.1_FG003	PF06813
AC233966.1_FG008	PF03478
AC233967.1_FG001	PF02201
AC233967.1_FG002	PF00079
AC233967.1_FG005	PF07714
AC233979.1_FG006	PF04570
AC233979.1_FG007	PF04570
AC233979.1_FG008	PF04570
AC233979.1_FG009	PF00134
AC233979.1_FG011	PF13639
AC234091.1_FG001	PF14310,PF00933,PF01915
AC234109.1_FG003	PF04434,PF00564,PF10551,PF03108
AC234148.1_FG001	PF03478
AC234149.1_FG001	PF14111
AC234149.1_FG002	PF03195
AC234152.1_FG002	PF00027,PF11834,PF12796,PF00520
AC234152.1_FG005	PF13364,PF02449,PF02140,PF01301
AC234152.1_FG007	PF00520
AC234154.1_FG007	PF00378,PF16113
AC234154.1_FG008	PF02450
AC234155.1_FG002	PF00249,PF14379
AC234156.1_FG005	PF02469
AC234157.1_FG002	PF00380
AC234157.1_FG003	PF14009
AC234158.1_FG005	PF01426,PF08711
AC234159.1_FG002	PF00153
AC234160.1_FG003	PF00232
AC234160.1_FG008	PF02671
AC234161.1_FG001	PF14547
AC234161.1_FG002	PF14547
AC234163.1_FG002	PF00107,PF08240
AC234164.1_FG004	PF03514
AC234166.1_FG001	PF14492,PF00679,PF03764
AC234167.1_FG002	PF03514
AC234171.1_FG001	PF07714
AC234171.1_FG003	PF07651
AC234173.1_FG001	PF00732
AC234175.1_FG010	PF13041
AC234180.1_FG002	PF01363,PF04366
AC234180.1_FG004	PF00230
AC234183.1_FG001	PF03732
AC234183.1_FG002	PF00183
AC234185.1_FG004	PF07722,PF06418
AC234185.1_FG006	PF00319
AC234187.1_FG007	PF14288
AC234189.1_FG002	PF13812,PF01535
AC234189.1_FG003	PF01798
AC234190.1_FG001	PF03330,PF01357
AC234190.1_FG002	PF00394,PF07732,PF07731
AC234193.1_FG001	PF00069
AC234199.1_FG003	PF02260,PF00454
AC234201.1_FG003	PF01593
AC234202.1_FG004	PF12776
AC234203.1_FG004	PF00664,PF00005
AC234203.1_FG009	PF10153
AC234203.1_FG011	PF04873
AC234513.1_FG005	PF00281
AC234515.1_FG002	PF16900
AC234515.1_FG003	PF03953,PF00091
AC234517.1_FG001	PF01215
AC234517.1_FG005	PF00067,PF04130
AC234519.1_FG003	PF03088
AC234519.1_FG005	PF03088
AC234520.1_FG003	PF00249
AC234520.1_FG005	PF10644,PF14881
AC234521.1_FG004	PF01988
AC234521.1_FG006	PF03634
AC234522.1_FG005	PF11623
AC234524.1_FG005	PF00201
AC234526.1_FG005	PF01370
AC234528.1_FG001	PF12174
AC234528.1_FG004	PF11595
AC234528.1_FG005	PF00920
AC234528.1_FG006	PF14226,PF03171
AC234575.1_FG003	PF00291
AC235011.1_FG012	PF08423
AC235534.1_FG007	PF00046,PF01852
AC235535.1_FG001	PF04851,PF09110,PF09111,PF00271
AC235540.1_FG002	PF08263,PF13855,PF07714
AC235541.1_FG002	PF00226,PF11926
AC235543.1_FG002	PF00083
AC235544.1_FG004	PF04124
AC235544.1_FG006	PF00190
AC235546.1_FG001	PF04783,PF04782
AC235546.1_FG002	PF00578
AC235547.1_FG005	PF08263,PF07714
AC235548.1_FG002	PF13912
AF466202.2_FG001	PF00390
AF466202.2_FG007	PF00248
AF466202.2_FG008	PF08243
AF546187.1_FG001	PF01559
AF546187.1_FG002	PF01559
AF546187.1_FG007	PF01559
AF546187.1_FG009	PF12776,PF01559
AF546187.1_FG011	PF00067
AF546187.1_FG012	PF13912
AF546188.1_FG001	PF01559
AF546188.1_FG002	PF01559
AF546188.1_FG003	PF01559
AF546188.1_FG005	PF01559
AF546188.1_FG006	PF01559
AF546188.1_FG007	PF01559
AY530952.1_FG001	PF00924
AY530952.1_FG002	PF01126,PF03759
AY542798.1_FG003	PF13696
EF517601.1_FG001	PF02892,PF05699,PF04937
EF517601.1_FG006	PF00403
EF517601.1_FG009	PF00403
EF517601.1_FG010	PF04504
EF517601.1_FG012	PF00118
EF517601.1_FG014	PF02446
EF517601.1_FG015	PF12600
EF517601.1_FG023	PF03367
GRMZM2G000014	PF00097
GRMZM2G000039	PF04499
GRMZM2G000044	PF05627
GRMZM2G000047	PF02705
GRMZM2G000052	PF13450
GRMZM2G000062	PF00069
GRMZM2G000092	PF00378
GRMZM2G000093	PF02732
GRMZM2G000103	PF13912
GRMZM2G000107	PF00141
GRMZM2G000114	PF13639
GRMZM2G000118	PF00781
GRMZM2G000124	PF10237
GRMZM2G000129	PF00625
GRMZM2G000154	PF00743
GRMZM2G000158	PF02309
GRMZM2G000166	PF00403
GRMZM2G000171	PF07716
GRMZM2G000195	PF08372,PF00168
GRMZM2G000199	PF16845
GRMZM2G000209	PF00892
GRMZM2G000219	PF00403
GRMZM2G000221	PF14368
GRMZM2G000231	PF00326
GRMZM2G000236	PF00724
GRMZM2G000242	PF00006
GRMZM2G000256	PF01789
GRMZM2G000261	PF02214
GRMZM2G000264	PF00702
GRMZM2G000268	PF00248
GRMZM2G000269	PF07762
GRMZM2G000278	PF00069
GRMZM2G000280	PF06999
GRMZM2G000326	PF00280
GRMZM2G000332	PF12014
GRMZM2G000353	PF13639
GRMZM2G000361	PF13812
GRMZM2G000371	PF07717,PF04408
GRMZM2G000376	PF03094
GRMZM2G000393	PF13334,PF01762
GRMZM2G000404	PF13423
GRMZM2G000423	PF03171,PF14226
GRMZM2G000427	PF00743
GRMZM2G000435	PF04970
GRMZM2G000451	PF03372
GRMZM2G000471	PF00230
GRMZM2G000481	PF00579
GRMZM2G000483	PF00135
GRMZM2G000489	PF00135
GRMZM2G000491	PF13232,PF12796
GRMZM2G000510	PF00153
GRMZM2G000520	PF00847
GRMZM2G000531	PF04116
GRMZM2G000540	PF13696,PF08783
GRMZM2G000566	PF07944
GRMZM2G000576	PF12394
GRMZM2G000581	PF03016
GRMZM2G000584	PF00069
GRMZM2G000586	PF08659
GRMZM2G000587	PF01501
GRMZM2G000592	PF12706,PF07522
GRMZM2G000593	PF01554
GRMZM2G000601	PF00179
GRMZM2G000603	PF00481
GRMZM2G000610	PF02536
GRMZM2G000614	PF14510,PF08370,PF00005,PF01061
GRMZM2G000615	PF08700
GRMZM2G000620	PF08276,PF00954,PF01453,PF07714
GRMZM2G000622	PF02769,PF13507
GRMZM2G000623	PF03931
GRMZM2G000632	PF01073
GRMZM2G000633	PF07714
GRMZM2G000645	PF00400,PF04053
GRMZM2G000650	PF04502
GRMZM2G000652	PF01734
GRMZM2G000660	PF00782
GRMZM2G000665	PF06027
GRMZM2G000670	PF02458
GRMZM2G000674	PF01535,PF13041
GRMZM2G000686	PF02045
GRMZM2G000700	PF00153
GRMZM2G000706	PF01412
GRMZM2G000718	PF03908
GRMZM2G000719	PF00595
GRMZM2G000729	PF03478
GRMZM2G000737	PF16201,PF01474
GRMZM2G000739	PF00590
GRMZM2G000741	PF00153
GRMZM2G000743	PF03790,PF03791
GRMZM2G000749	PF00570,PF01612
GRMZM2G000753	PF12906
GRMZM2G000764	PF03141
GRMZM2G000781	PF14697
GRMZM2G000801	PF00410
GRMZM2G000812	PF03083
GRMZM2G000816	PF08449
GRMZM2G000818	PF00249
GRMZM2G000823	PF00270,PF00271
GRMZM2G000825	PF00515
GRMZM2G000842	PF00170,PF14144
GRMZM2G000877	PF16900
GRMZM2G000909	PF00651
GRMZM2G000923	PF01849
GRMZM2G000932	PF00106
GRMZM2G000936	PF00515,PF13414
GRMZM2G000937	PF03901
GRMZM2G000959	PF07983,PF00332
GRMZM2G000964	PF12706
GRMZM2G000973	PF10033
GRMZM2G000976	PF03016
GRMZM2G000980	PF00013,PF00076,PF16275
GRMZM2G001024	PF13920
GRMZM2G001033	PF04142
GRMZM2G001035	PF01988
GRMZM2G001048	PF02362
GRMZM2G001079	PF03360
GRMZM2G001084	PF02861,PF02151,PF07728,PF00004,PF10431
GRMZM2G001088	PF04000
GRMZM2G001097	PF02176
GRMZM2G001106	PF00249
GRMZM2G001114	PF12678
GRMZM2G001116	PF00307
GRMZM2G001131	PF04504
GRMZM2G001139	PF01486,PF00319
GRMZM2G001160	PF16124,PF00270,PF00271
GRMZM2G001164	PF02984,PF00134
GRMZM2G001169	PF07816
GRMZM2G001180	PF13516
GRMZM2G001191	PF01909,PF03828
GRMZM2G001195	PF07651
GRMZM2G001200	PF14009
GRMZM2G001205	PF13912
GRMZM2G001221	PF13499,PF13202
GRMZM2G001223	PF00249
GRMZM2G001241	PF00657
GRMZM2G001243	PF00481
GRMZM2G001247	PF01190
GRMZM2G001255	PF09585
GRMZM2G001265	PF01529
GRMZM2G001272	PF00646,PF01167
GRMZM2G001283	PF03953
GRMZM2G001288	PF07983,PF00332
GRMZM2G001289	PF00046,PF01852
GRMZM2G001296	PF01933
GRMZM2G001297	PF08028,PF02771,PF02770,PF01636
GRMZM2G001304	PF02358,PF00982
GRMZM2G001327	PF03144,PF03143,PF00009
GRMZM2G001334	PF14764
GRMZM2G001361	PF03552
GRMZM2G001401	PF01370
GRMZM2G001405	PF00278,PF02784
GRMZM2G001415	PF01876
GRMZM2G001421	PF03321
GRMZM2G001426	PF03514
GRMZM2G001444	PF09725
GRMZM2G001447	PF06203
GRMZM2G001457	PF00069
GRMZM2G001466	PF14432,PF01535,PF13041
GRMZM2G001497	PF03407
GRMZM2G001500	PF06723
GRMZM2G001508	PF03767
GRMZM2G001514	PF02469
GRMZM2G001524	PF00334
GRMZM2G001530	PF00249
GRMZM2G001550	PF00153
GRMZM2G001551	PF06858
GRMZM2G001570	PF01940
GRMZM2G001577	PF08879
GRMZM2G001588	PF14389
GRMZM2G001592	PF08879
GRMZM2G001606	PF08879
GRMZM2G001627	PF14291
GRMZM2G001631	PF00035,PF00636
GRMZM2G001639	PF00646,PF14299
GRMZM2G001645	PF00368
GRMZM2G001652	PF05664
GRMZM2G001660	PF00631
GRMZM2G001661	PF00786
GRMZM2G001663	PF03101
GRMZM2G001668	PF07714
GRMZM2G001676	PF00854
GRMZM2G001696	PF01293
GRMZM2G001699	PF02319
GRMZM2G001713	PF03489,PF05184,PF00026
GRMZM2G001721	PF04844
GRMZM2G001724	PF04117
GRMZM2G001730	PF13837
GRMZM2G001750	PF12697
GRMZM2G001755	PF00574
GRMZM2G001764	PF00854
GRMZM2G001784	PF08152
GRMZM2G001799	PF02309
GRMZM2G001803	PF02535
GRMZM2G001805	PF04359
GRMZM2G001812	PF08263,PF00069,PF13855
GRMZM2G001814	PF13499
GRMZM2G001816	PF00281,PF00673
GRMZM2G001820	PF13088
GRMZM2G001824	PF00249
GRMZM2G001845	PF08263,PF00069
GRMZM2G001850	PF00076
GRMZM2G001867	PF03004
GRMZM2G001869	PF06632
GRMZM2G001875	PF00249
GRMZM2G001887	PF01849
GRMZM2G001895	PF00226,PF14237
GRMZM2G001898	PF00171
GRMZM2G001904	PF01812
GRMZM2G001905	PF00293
GRMZM2G001915	PF00153
GRMZM2G001918	PF01103
GRMZM2G001924	PF03998,PF07714
GRMZM2G001930	PF00010,PF14215
GRMZM2G001934	PF00560,PF08263,PF07714
GRMZM2G001938	PF03016
GRMZM2G001946	PF13947
GRMZM2G001953	PF08477
GRMZM2G001956	PF00254
GRMZM2G001973	PF03763
GRMZM2G001977	PF12695
GRMZM2G001991	PF01073
GRMZM2G001994	PF12776,PF00295,PF01486,PF00107
GRMZM2G002002	PF01909
GRMZM2G002010	PF05605
GRMZM2G002023	PF01501
GRMZM2G002034	PF12708
GRMZM2G002043	PF01535
GRMZM2G002055	PF03931
GRMZM2G002059	PF00248
GRMZM2G002075	PF00170
GRMZM2G002077	PF03214
GRMZM2G002100	PF00069
GRMZM2G002115	PF08627
GRMZM2G002119	PF00847
GRMZM2G002121	PF13602
GRMZM2G002124	PF00069
GRMZM2G002128	PF00249
GRMZM2G002131	PF00447
GRMZM2G002135	PF01553
GRMZM2G002138	PF05904
GRMZM2G002142	PF00067
GRMZM2G002161	PF00682
GRMZM2G002167	PF01798
GRMZM2G002173	PF04127
GRMZM2G002178	PF00067
GRMZM2G002191	PF03715
GRMZM2G002220	PF02518,PF00183
GRMZM2G002225	PF03789,PF05920,PF03790,PF03791
GRMZM2G002227	PF13414
GRMZM2G002260	PF02018,PF00331
GRMZM2G002276	PF03847
GRMZM2G002280	PF00097
GRMZM2G002286	PF12695
GRMZM2G002297	PF01544
GRMZM2G002304	PF08659
GRMZM2G002391	PF01733
GRMZM2G002396	PF04535
GRMZM2G002416	PF00549,PF00285
GRMZM2G002420	PF06376
GRMZM2G002427	PF12937
GRMZM2G002440	PF01025
GRMZM2G002465	PF05553
GRMZM2G002473	PF14291,PF13947,PF07714
GRMZM2G002498	PF00164
GRMZM2G002499	PF01504
GRMZM2G002512	PF00564
GRMZM2G002515	PF08263,PF00069,PF13855
GRMZM2G002523	PF13632,PF14569
GRMZM2G002531	PF07714
GRMZM2G002542	PF08263,PF13855,PF07714
GRMZM2G002548	PF15614
GRMZM2G002555	PF00314,PF00069
GRMZM2G002568	PF05078
GRMZM2G002569	PF13855,PF00069
GRMZM2G002595	PF00085
GRMZM2G002606	PF06943
GRMZM2G002614	PF00501
GRMZM2G002616	PF01652
GRMZM2G002630	PF03018,PF01419
GRMZM2G002642	PF16953
GRMZM2G002652	PF01212
GRMZM2G002656	PF03446,PF14303,PF00931
GRMZM2G002687	PF00579
GRMZM2G002699	PF03151
GRMZM2G002704	PF14226,PF03171
GRMZM2G002748	PF00069
GRMZM2G002754	PF00111
GRMZM2G002756	PF02617
GRMZM2G002765	PF00899
GRMZM2G002786	PF02453
GRMZM2G002805	PF13912
GRMZM2G002807	PF00121
GRMZM2G002815	PF13912
GRMZM2G002818	PF08263
GRMZM2G002825	PF00241
GRMZM2G002828	PF08271,PF00382
GRMZM2G002830	PF00179
GRMZM2G002851	PF09190,PF01406
GRMZM2G002859	PF14604
GRMZM2G002863	PF13812,PF01535
GRMZM2G002871	PF02902
GRMZM2G002874	PF00076
GRMZM2G002879	PF00557
GRMZM2G002894	PF00012
GRMZM2G002898	PF00067
GRMZM2G002903	PF00076,PF02136
GRMZM2G002910	PF13671
GRMZM2G002915	PF00046,PF02183
GRMZM2G002921	PF00550
GRMZM2G002932	PF12776
GRMZM2G002950	PF08263,PF00560,PF07714,PF13855
GRMZM2G002959	PF02770,PF00441,PF02771
GRMZM2G002961	PF01852,PF07059
GRMZM2G002978	PF00696,PF13837
GRMZM2G002993	PF01734
GRMZM2G002999	PF02891
GRMZM2G003002	PF00538
GRMZM2G003022	PF00626,PF04810,PF04815,PF08033,PF04811
GRMZM2G003023	PF13881
GRMZM2G003028	PF00085
GRMZM2G003033	PF00153
GRMZM2G003038	PF13847
GRMZM2G003043	PF11934,PF01857,PF01858
GRMZM2G003057	PF05742
GRMZM2G003059	PF13499
GRMZM2G003064	PF03694
GRMZM2G003068	PF14392,PF00098
GRMZM2G003076	PF06454
GRMZM2G003090	PF07939
GRMZM2G003092	PF07762
GRMZM2G003096	PF07228
GRMZM2G003108	PF00650
GRMZM2G003109	PF04715,PF00425
GRMZM2G003124	PF10496
GRMZM2G003138	PF08541,PF08392
GRMZM2G003157	PF03144,PF00679,PF06421,PF00009
GRMZM2G003165	PF02469
GRMZM2G003167	PF07859
GRMZM2G003172	PF07542
GRMZM2G003179	PF04145
GRMZM2G003182	PF04542,PF04539,PF04545
GRMZM2G003186	PF00378
GRMZM2G003190	PF08545
GRMZM2G003225	PF08743
GRMZM2G003230	PF00329
GRMZM2G003246	PF00135
GRMZM2G003264	PF02518
GRMZM2G003289	PF00291
GRMZM2G003304	PF02183,PF00046
GRMZM2G003306	PF00125,PF16211
GRMZM2G003307	PF09785,PF01798
GRMZM2G003318	PF04755
GRMZM2G003331	PF01150
GRMZM2G003342	PF01980
GRMZM2G003354	PF01263
GRMZM2G003368	PF03405
GRMZM2G003379	PF00759
GRMZM2G003384	PF01159
GRMZM2G003385	PF06415,PF01676
GRMZM2G003406	PF00249
GRMZM2G003409	PF14200
GRMZM2G003411	PF14510,PF08370,PF00005,PF01061
GRMZM2G003424	PF00076
GRMZM2G003466	PF00847
GRMZM2G003488	PF11331
GRMZM2G003489	PF00447
GRMZM2G003493	PF00571
GRMZM2G003501	PF08541,PF08392
GRMZM2G003506	PF03188,PF04526
GRMZM2G003509	PF00046,PF08670,PF01852
GRMZM2G003514	PF00319,PF01486
GRMZM2G003518	PF03081
GRMZM2G003526	PF04116
GRMZM2G003538	PF12776
GRMZM2G003551	PF03106
GRMZM2G003558	PF04873
GRMZM2G003563	PF00106
GRMZM2G003565	PF00415
GRMZM2G003607	PF01603
GRMZM2G003625	PF00931
GRMZM2G003635	PF00226,PF14901
GRMZM2G003638	PF08265,PF05764
GRMZM2G003640	PF00782
GRMZM2G003642	PF03650
GRMZM2G003648	PF13207
GRMZM2G003656	PF13639,PF02225
GRMZM2G003662	PF07714
GRMZM2G003663	PF12937
GRMZM2G003669	PF05678
GRMZM2G003679	PF04504
GRMZM2G003682	PF07231,PF07014
GRMZM2G003692	PF00106
GRMZM2G003708	PF14291
GRMZM2G003715	PF02365
GRMZM2G003718	PF12695
GRMZM2G003720	PF03061
GRMZM2G003724	PF02390,PF00162
GRMZM2G003725	PF13639
GRMZM2G003732	PF06862
GRMZM2G003734	PF00995
GRMZM2G003738	PF05553
GRMZM2G003742	PF13041
GRMZM2G003750	PF02517
GRMZM2G003752	PF02469
GRMZM2G003755	PF02671,PF00931
GRMZM2G003759	PF03986
GRMZM2G003762	PF13537
GRMZM2G003769	PF05648
GRMZM2G003784	PF14543
GRMZM2G003789	PF07687,PF01546
GRMZM2G003794	PF00331
GRMZM2G003796	PF00067
GRMZM2G003814	PF08240,PF00107
GRMZM2G003821	PF14009
GRMZM2G003838	PF04043
GRMZM2G003852	PF04756
GRMZM2G003853	PF05241
GRMZM2G003861	PF13847
GRMZM2G003869	PF01535,PF13041
GRMZM2G003875	PF13535,PF02843,PF02844
GRMZM2G003883	PF02887,PF00224
GRMZM2G003897	PF00076
GRMZM2G003909	PF01190
GRMZM2G003917	PF02469
GRMZM2G003927	PF13912
GRMZM2G003930	PF12906,PF12428
GRMZM2G003937	PF12734
GRMZM2G003944	PF03634
GRMZM2G003953	PF00179
GRMZM2G003984	PF00004,PF02190,PF05362
GRMZM2G003988	PF03381
GRMZM2G004012	PF02298
GRMZM2G004019	PF09127
GRMZM2G004023	PF13920,PF12483
GRMZM2G004030	PF00248
GRMZM2G004036	PF01370
GRMZM2G004040	PF07728,PF01434
GRMZM2G004057	PF01157
GRMZM2G004060	PF03106
GRMZM2G004079	PF14531
GRMZM2G004087	PF14288,PF04652
GRMZM2G004090	PF00249
GRMZM2G004092	PF14383,PF14309
GRMZM2G004106	PF02298
GRMZM2G004128	PF01494
GRMZM2G004131	PF00348
GRMZM2G004138	PF13578
GRMZM2G004140	PF05623
GRMZM2G004150	PF00145
GRMZM2G004160	PF02298
GRMZM2G004161	PF00651,PF02135
GRMZM2G004172	PF06212
GRMZM2G004180	PF05553
GRMZM2G004183	PF14416,PF13839
GRMZM2G004188	PF00752,PF00867
GRMZM2G004207	PF07714
GRMZM2G004211	PF00141
GRMZM2G004222	PF01126
GRMZM2G004224	PF00124
GRMZM2G004259	PF05047
GRMZM2G004276	PF01734,PF11815
GRMZM2G004278	PF13947
GRMZM2G004290	PF10153
GRMZM2G004298	PF07883
GRMZM2G004301	PF03372
GRMZM2G004305	PF00504
GRMZM2G004314	PF01496
GRMZM2G004320	PF04140
GRMZM2G004330	PF07714
GRMZM2G004334	PF00046,PF01852
GRMZM2G004349	PF02453
GRMZM2G004356	PF00010
GRMZM2G004362	PF04398
GRMZM2G004377	PF07228
GRMZM2G004382	PF07991,PF01450
GRMZM2G004384	PF02786
GRMZM2G004385	PF00642
GRMZM2G004397	PF09177
GRMZM2G004408	PF00786
[truncated: 27,512 more rows]

## Sheet: Table 6. GO
Supplementary Table 6 - Example gene GO terms annotation
Citation:	Goodstein, David M., Shengqiang Shu, Russell Howson, Rochak Neupane, Richard D. Hayes, Joni Fazo, Therese Mitros, William Dirks, Uffe Hellsten, Nicholas Putnam, and Daniel S. Rokhsar. 2012. “Phytozome: A Comparative Platform for Green Plant Genomics.” Nucleic Acids Research 40(D1):D1178–86.
DOI:	doi: 10.1093/nar/gkr944
Link:	https://phytozome.jgi.doe.gov/pz/portal.html
File:	Zmays_284_Ensembl-18_2010-01-MaizeSequence.annotation_info.txt
Notes:	(1) Genes with no annotated GO terms were removed
genes	term
AC148152.3_FG005	GO:0055114,GO:0016491
AC148152.3_FG008	GO:0005975,GO:0004553
AC149475.2_FG003	GO:0019773,GO:0006511,GO:0004175,GO:0051603,GO:0005839,GO:0004298
AC149475.2_FG004	GO:0006418,GO:0005524,GO:0004812,GO:0000166
AC149475.2_FG007	GO:0008080
AC149810.2_FG003	GO:0036459,GO:0016579
AC149810.2_FG008	GO:0006468,GO:0004672
AC149818.2_FG001	GO:0005525
AC149818.2_FG004	GO:0016538,GO:0007049
AC149828.2_FG002	GO:0019773,GO:0006511,GO:0004175,GO:0051603,GO:0005839,GO:0004298
AC149829.2_FG003	GO:0006810,GO:0005643
AC149829.2_FG004	GO:0046983
AC149829.2_FG006	GO:0005515
AC152495.1_FG002	GO:0043531
AC152495.1_FG003	GO:0043531
AC152495.1_FG006	GO:0005524
AC152495.1_FG010	GO:0043531
AC152495.1_FG012	GO:0008080
AC152495.1_FG015	GO:0043531
AC152495.1_FG017	GO:0043531
AC155376.2_FG005	GO:0005975,GO:0004553
AC155377.1_FG001	GO:0016459,GO:0005524,GO:0003774,GO:0005515
AC155377.1_FG002	GO:0006508,GO:0004190
AC155434.2_FG003	GO:0006508,GO:0004190
AC155434.2_FG006	GO:0006355,GO:0003677
AC155496.2_FG009	GO:0031625,GO:0006511
AC155610.2_FG007	GO:0016747
AC155622.2_FG001	GO:0030126,GO:0016192,GO:0006886,GO:0005515,GO:0005198
AC155622.2_FG004	GO:0005515
AC155624.2_FG006	GO:0006470,GO:0004722
AC159612.1_FG007	GO:0005975,GO:0004553
AC165171.2_FG002	GO:0043565,GO:0006355,GO:0003700
AC166636.1_FG007	GO:0005515
AC166636.1_FG008	GO:0005525
AC166636.1_FG009	GO:0003723
AC177889.2_FG006	GO:0016021,GO:0005783
AC177893.3_FG003	GO:0016788
AC177893.3_FG005	GO:0071805,GO:0016020,GO:0015079
AC177897.2_FG021	GO:0005524
AC177897.2_FG022	GO:0055114,GO:0016491,GO:0005507
AC177899.2_FG012	GO:0008234,GO:0006508
AC177908.3_FG002	GO:0016757,GO:0047262
AC177924.2_FG001	GO:0046983
AC177933.2_FG005	GO:0016021,GO:0006952
AC177936.6_FG008	GO:0031625,GO:0006511
AC182439.4_FG004	GO:0016021
AC182482.3_FG003	GO:0055085,GO:0016021,GO:0008324,GO:0006812
AC182617.3_FG001	GO:0009089,GO:0008837
AC183315.4_FG006	GO:0005515
AC183590.4_FG001	GO:0042398,GO:0004357
AC183928.4_FG006	GO:0006508,GO:0004190
AC183938.4_FG004	GO:0006351,GO:0003899,GO:0003677
AC183938.4_FG011	GO:0008270
AC184131.5_FG010	GO:0030244,GO:0016760,GO:0016020
AC184164.2_FG006	GO:0008408,GO:0006139,GO:0003676
AC184699.3_FG005	GO:0016705,GO:0016117
AC184794.2_FG003	GO:0016020,GO:0006810,GO:0005215
AC184831.3_FG003	GO:0016758,GO:0008152
AC184831.3_FG005	GO:0043565,GO:0008270,GO:0006355,GO:0003700
AC184831.3_FG008	GO:0043565,GO:0008270,GO:0006355,GO:0003700
AC184834.3_FG007	GO:0006468,GO:0004672
AC184866.3_FG007	GO:0003677
AC184871.2_FG002	GO:0006260,GO:0005524,GO:0003677
AC185122.3_FG008	GO:0015074
AC185126.3_FG006	GO:0008270,GO:0005515
AC185130.2_FG004	GO:0006508,GO:0004222
AC185226.4_FG006	GO:0016787
AC185254.4_FG002	GO:0016021,GO:0006810,GO:0005215
AC185276.2_FG006	GO:0007076,GO:0000796
AC185415.3_FG005	GO:0003676,GO:0008270
AC185434.4_FG004	GO:0006355,GO:0005634,GO:0003700
AC185460.3_FG004	GO:0008270,GO:0005515
AC185466.3_FG001	GO:0006887,GO:0000145
AC185468.3_FG003	GO:0006413,GO:0003743
AC185471.3_FG005	GO:0007017,GO:0005875
AC185500.3_FG004	GO:0004553
AC185501.3_FG001	GO:0007018,GO:0005871,GO:0003777
AC185531.2_FG001	GO:0005509
AC185603.4_FG007	GO:0009058,GO:0004161
AC185612.3_FG002	GO:0006308,GO:0004519,GO:0003676
AC185648.3_FG001	GO:0007094
AC185667.3_FG007	GO:0006508,GO:0004190
AC185668.3_FG001	GO:0006402,GO:0004654,GO:0003723
AC186147.3_FG008	GO:0016757,GO:0016021
AC186165.2_FG002	GO:0016788
AC186166.3_FG008	GO:0046872,GO:0030001
AC186223.3_FG003	GO:0006529,GO:0004066
AC186302.3_FG013	GO:0016758,GO:0008152
AC186333.2_FG006	GO:0008270,GO:0006355,GO:0006352,GO:0006384,GO:0000126
AC186519.4_FG002	GO:0009733
AC186529.4_FG014	GO:0005506
AC186577.3_FG006	GO:0004857
AC186579.3_FG007	GO:0008270,GO:0005515
AC186585.4_FG002	GO:0004045
AC186603.6_FG003	GO:0055114,GO:0020037,GO:0016705,GO:0005506
AC186604.4_FG003	GO:0050660,GO:0008033
AC186606.4_FG003	GO:0043565,GO:0006355,GO:0003700
AC186802.4_FG002	GO:0055114,GO:0020037,GO:0016705,GO:0005506
AC187072.4_FG002	GO:0008408,GO:0006139,GO:0003676
AC187157.4_FG001	GO:0006355,GO:0003700
AC187157.4_FG005	GO:0003677,GO:0008289
AC187285.5_FG004	GO:0016157,GO:0005985
AC187792.3_FG008	GO:0006468,GO:0004672
AC187809.3_FG005	GO:0008234,GO:0006508
AC187843.3_FG010	GO:0006355,GO:0003677
AC187875.3_FG006	GO:0016779,GO:0009058
AC187910.5_FG006	GO:0051568,GO:0016575,GO:0005634
AC188001.3_FG009	GO:0008380,GO:0005681
AC188005.3_FG003	GO:0016020,GO:0006810,GO:0005215
AC188024.3_FG003	GO:0006468,GO:0004672
AC188195.2_FG003	GO:0009611,GO:0004867
AC188195.2_FG004	GO:0009611,GO:0004867
AC188195.2_FG005	GO:0009611,GO:0004867
AC188713.2_FG005	GO:0045010,GO:0005884
AC188832.5_FG005	GO:0006355,GO:0005634,GO:0003700
AC189061.3_FG004	GO:0006468,GO:0005524,GO:0004672
AC189280.3_FG001	GO:0005515
AC189750.4_FG004	GO:0045454,GO:0008152,GO:0003824
AC189754.3_FG004	GO:0008565,GO:0006606,GO:0005737,GO:0005634
AC189879.3_FG003	GO:0005515,GO:0003676
AC190507.1_FG007	GO:0019205,GO:0006139,GO:0005524
AC190516.1_FG003	GO:0016567,GO:0004842
AC190518.1_FG002	GO:0030244,GO:0016866
AC190560.2_FG002	GO:0006760,GO:0004150
AC190561.3_FG002	GO:0055114,GO:0016491
AC190582.4_FG011	GO:0005515
AC190609.3_FG001	GO:0043565,GO:0006355,GO:0003700
AC190609.3_FG002	GO:0006412,GO:0005840,GO:0005622,GO:0003735
AC190609.3_FG004	GO:0006508,GO:0004190
AC190623.3_FG001	GO:0015979,GO:0009523,GO:0009507
AC190632.2_FG004	GO:0007264,GO:0005525
AC190636.3_FG005	GO:0055114,GO:0016491
AC190682.3_FG014	GO:0055085
AC190700.3_FG002	GO:0006508,GO:0004190
AC190713.3_FG004	GO:0016021
AC190716.3_FG001	GO:0006468,GO:0005524,GO:0004672
AC190750.2_FG014	GO:0005515
AC190753.4_FG002	GO:0043531
AC190761.3_FG002	GO:0006511,GO:0005622,GO:0004843
AC190772.4_FG011	GO:0045735
AC190788.2_FG005	GO:0030983,GO:0006298,GO:0005524
AC190807.2_FG001	GO:0030598,GO:0017148
AC190829.3_FG002	GO:0006412,GO:0005840,GO:0003735
AC190909.3_FG004	GO:0016020,GO:0006075,GO:0003843,GO:0000148
AC190933.3_FG004	GO:0006950
AC190940.3_FG005	GO:0030163,GO:0005524,GO:0004252,GO:0004176
AC190999.2_FG004	GO:0005515
AC191050.3_FG003	GO:0045735
AC191070.3_FG006	GO:0005789
AC191097.3_FG007	GO:0016021
AC191251.3_FG005	GO:0030014,GO:0006402
AC191272.3_FG003	GO:0043565,GO:0006351
AC191279.2_FG001	GO:0006355,GO:0003677
AC191279.2_FG003	GO:0006355,GO:0003677
AC191283.3_FG004	GO:0005515
AC191287.2_FG001	GO:0006260,GO:0005663,GO:0005524,GO:0003689
AC191325.3_FG005	GO:0006468,GO:0005524,GO:0004672
AC191359.3_FG003	GO:0003677
AC191412.3_FG002	GO:0005524
AC191523.3_FG001	GO:0030145,GO:0006302,GO:0005634,GO:0004519,GO:0006259,GO:0004527
AC191524.3_FG007	GO:0016021,GO:0006810
AC191534.3_FG003	GO:0046872,GO:0042393
AC191551.3_FG003	GO:0016747,GO:0008610,GO:0006633,GO:0004315
AC191650.3_FG003	GO:0008270,GO:0005515
AC191759.3_FG003	GO:0006412,GO:0005840,GO:0005622,GO:0003735
AC191802.3_FG004	GO:0016798,GO:0016020
AC192204.3_FG005	GO:0016020,GO:0009765
AC192236.3_FG007	GO:0043531,GO:0007275,GO:0006355,GO:0003700
AC192244.3_FG002	GO:0016020,GO:0015018
AC192244.3_FG007	GO:0009058,GO:0003824
AC192362.3_FG003	GO:0006412,GO:0005840,GO:0005622,GO:0003735
AC192377.3_FG002	GO:0055114,GO:0004471
AC192606.3_FG003	GO:0008270,GO:0003676
AC193362.3_FG002	GO:0006412,GO:0005840,GO:0005622,GO:0003735
AC193379.3_FG001	GO:0006468,GO:0004672
AC193382.3_FG002	GO:0000398
AC193430.3_FG005	GO:0006887,GO:0000145
AC193485.3_FG005	GO:0008234,GO:0006508
AC193500.3_FG003	GO:0055114,GO:0050661,GO:0050660,GO:0004499
AC193576.3_FG003	GO:0009611,GO:0004867
AC193595.3_FG001	GO:0016021
AC193598.3_FG002	GO:0005515,GO:0043531
AC193625.3_FG007	GO:0016887,GO:0005524
AC193630.3_FG003	GO:0043565,GO:0006355,GO:0003700
AC193632.2_FG002	GO:0006468,GO:0005524,GO:0004672
AC193754.3_FG008	GO:0030983,GO:0006298,GO:0005524
AC193767.3_FG003	GO:0003677
AC193786.3_FG005	GO:0046983,GO:0003677
AC193972.3_FG002	GO:0007094
AC194027.3_FG001	GO:0055114,GO:0020037,GO:0006979,GO:0004601
AC194069.3_FG003	GO:0006412,GO:0005840,GO:0005622,GO:0003735
AC194104.3_FG007	GO:0006351,GO:0005634,GO:0003677
AC194112.3_FG001	GO:0016020
AC194172.3_FG008	GO:0005634
AC194180.3_FG012	GO:0005815,GO:0000922,GO:0000226,GO:0007020,GO:0005856
AC194192.3_FG002	GO:0006508,GO:0004252
AC194259.3_FG002	GO:0010181
AC194296.3_FG001	GO:0006351,GO:0003899,GO:0003677,GO:0006893,GO:0000145
AC194341.4_FG002	GO:0015986,GO:0015078,GO:0000276
AC194341.4_FG004	GO:0005515
AC194341.4_FG008	GO:0003924,GO:0007017,GO:0005874
AC194362.3_FG003	GO:0043565,GO:0006355,GO:0003700
AC194442.3_FG004	GO:0055085,GO:0016021
AC194457.3_FG001	GO:0055085,GO:0016021,GO:0022857
AC194480.3_FG001	GO:0009611,GO:0004867
AC194480.3_FG003	GO:0009611,GO:0004867
AC194592.2_FG001	GO:0008168,GO:0008152
AC194628.3_FG003	GO:0005992,GO:0003824
AC194734.3_FG004	GO:0016020,GO:0009765
AC194852.3_FG007	GO:0030570
AC194965.4_FG001	GO:0005515,GO:0007165,GO:0000155
AC194965.4_FG004	GO:0043565,GO:0008270,GO:0006355,GO:0003700
AC194970.5_FG001	GO:0008299
AC194970.5_FG009	GO:0005524,GO:0003678,GO:0043141
AC194974.3_FG005	GO:0030246
AC194977.2_FG004	GO:0055114,GO:0030976,GO:0006099,GO:0004591
AC195147.3_FG001	GO:0005515
AC195211.3_FG001	GO:0006412,GO:0005840,GO:0005622,GO:0003735
AC195220.3_FG005	GO:0008234,GO:0006508
AC195220.3_FG007	GO:0016020
AC195230.2_FG003	GO:0006468,GO:0005524,GO:0004672
AC195319.3_FG001	GO:0016787
AC195323.3_FG011	GO:0055114,GO:0016020,GO:0003885
AC195340.3_FG001	GO:0003924,GO:0007017,GO:0005874
AC195340.3_FG004	GO:0006355,GO:0005634
AC195343.3_FG002	GO:0006457,GO:0005737
AC195349.3_FG005	GO:0006468,GO:0005524,GO:0004672
AC195366.3_FG008	GO:0070569,GO:0008152
AC195401.3_FG002	GO:0052726,GO:0052725,GO:0047325,GO:0032957,GO:0005622,GO:0005524,GO:0000287
AC195587.4_FG001	GO:0046983,GO:0003677
AC195587.4_FG004	GO:0043531
AC195587.4_FG005	GO:0006355,GO:0005634,GO:0003700
AC195671.2_FG001	GO:0055114,GO:0050661,GO:0050660,GO:0004499
AC195785.3_FG004	GO:0006468,GO:0005524,GO:0004672
AC195826.2_FG006	GO:0072488,GO:0016020,GO:0008519
AC195828.3_FG002	GO:0006468,GO:0005524,GO:0004672
AC195833.3_FG001	GO:0008017,GO:0007018,GO:0005524,GO:0003777,GO:0005871
AC195836.2_FG004	GO:0005096
AC195874.2_FG002	GO:0015031,GO:0008565
AC195951.2_FG014	GO:0017056,GO:0006913,GO:0005643
AC196031.3_FG006	GO:0016157,GO:0005985
AC196090.3_FG006	GO:0006508,GO:0004252
AC196166.3_FG001	GO:0007018,GO:0005871,GO:0003777
AC196183.3_FG002	GO:0006468,GO:0004672
AC196263.4_FG002	GO:0006508,GO:0004190
AC196266.3_FG008	GO:0043631,GO:0005634,GO:0004652
AC196278.2_FG003	GO:0008408
AC196278.2_FG004	GO:0008408
AC196294.3_FG005	GO:0006355,GO:0005634,GO:0003700
AC196412.3_FG001	GO:0030170,GO:0019752,GO:0016831
AC196437.3_FG001	GO:0006412,GO:0005840,GO:0005622,GO:0003735
AC196441.3_FG004	GO:0016157,GO:0005985
AC196465.3_FG006	GO:0006355,GO:0006351
AC196475.3_FG004	GO:0046983,GO:0008171
AC196475.3_FG005	GO:0006355,GO:0003677
AC196489.3_FG002	GO:0006412,GO:0005840,GO:0003735
AC196708.3_FG006	GO:0009733
AC196779.3_FG003	GO:0003993
AC196793.2_FG002	GO:0016020,GO:0006810,GO:0005215
AC196978.5_FG007	GO:0006457,GO:0003755,GO:0000413
AC197007.3_FG007	GO:0016798,GO:0016020
AC197016.3_FG003	GO:0016021,GO:0006810
AC197029.3_FG003	GO:0006468,GO:0005524,GO:0004672
AC197078.4_FG002	GO:0003676
AC197122.3_FG003	GO:0006355,GO:0005634
AC197146.3_FG001	GO:0006270
AC197150.3_FG003	GO:0055085,GO:0016020,GO:0006811,GO:0005216
AC197168.3_FG001	GO:0030170,GO:0008483
AC197196.3_FG002	GO:0055114,GO:0016491,GO:0051568,GO:0016575,GO:0005634
AC197242.3_FG001	GO:0016747
AC197246.3_FG001	GO:0005525
AC197246.3_FG003	GO:0006412,GO:0005840,GO:0005622,GO:0003735
AC197333.2_FG001	GO:0055114,GO:0016491,GO:0009073,GO:0003856
AC197354.3_FG002	GO:0000160
AC197362.3_FG002	GO:0006468,GO:0005524,GO:0004672
AC197364.3_FG007	GO:0006355,GO:0003677
AC197437.3_FG001	GO:0004725
AC197446.3_FG009	GO:0008234,GO:0006508
AC197541.3_FG009	GO:0016787
AC197544.3_FG001	GO:0005524,GO:0003676
AC197544.3_FG002	GO:0008234,GO:0006508
AC197555.3_FG008	GO:0016853,GO:0005975
AC197575.3_FG005	GO:0008236,GO:0006508
AC197575.3_FG008	GO:0019904
AC197578.4_FG001	GO:0005975,GO:0004553
AC197672.3_FG002	GO:0006633,GO:0005524,GO:0003989
AC197699.3_FG001	GO:0006355,GO:0005634,GO:0003700
AC197699.3_FG003	GO:0055114,GO:0016491
AC197705.4_FG001	GO:0030976,GO:0003824,GO:0000287
AC197705.4_FG004	GO:0008270,GO:0005515
AC197705.4_FG007	GO:0019867
AC197705.4_FG011	GO:0070569,GO:0008152
AC197717.3_FG002	GO:0007165
AC197758.3_FG004	GO:0055114,GO:0020037,GO:0006979,GO:0004601
AC197783.3_FG005	GO:0055114,GO:0017004,GO:0016020
AC197910.3_FG001	GO:0046983
AC198028.3_FG001	GO:0048015,GO:0046854,GO:0006661,GO:0004430
AC198118.4_FG002	GO:0055114,GO:0020037,GO:0016705,GO:0005506
AC198169.4_FG004	GO:0016787,GO:0005524,GO:0003677
AC198206.5_FG001	GO:0055114,GO:0050660,GO:0016491,GO:0016020,GO:0003885
AC198206.5_FG002	GO:0003676
AC198225.4_FG002	GO:0008270
AC198353.5_FG001	GO:0006508,GO:0004185
AC198353.5_FG004	GO:0006355,GO:0003723
AC198361.3_FG004	GO:0003676
AC198380.3_FG001	GO:0005975,GO:0004553
AC198398.3_FG005	GO:0006468,GO:0004672
AC198403.3_FG001	GO:0006355,GO:0003700
AC198418.3_FG005	GO:0016787,GO:0005524,GO:0003677,GO:0008270,GO:0003676,GO:0005634,GO:0004386,GO:0003723
AC198476.3_FG004	GO:0003677
AC198481.3_FG004	GO:0005515,GO:0016773
AC198515.3_FG011	GO:0055085
AC198518.3_FG002	GO:0005515
AC198518.3_FG005	GO:0046983
AC198597.4_FG001	GO:0055114,GO:0020037,GO:0006979,GO:0004601
AC198699.3_FG004	GO:0016491
AC198700.2_FG004	GO:0016020,GO:0006810,GO:0005215
AC198725.4_FG007	GO:0030131,GO:0016192,GO:0006886,GO:0030117
AC198725.4_FG009	GO:0043565,GO:0006355,GO:0003700
AC198749.3_FG004	GO:0006779,GO:0004853
AC198937.4_FG003	GO:0009073,GO:0004106
AC198937.4_FG005	GO:0006355,GO:0003677
AC198971.3_FG006	GO:0055114,GO:0016616,GO:0019752
AC198979.4_FG009	GO:0006355,GO:0003700
AC199039.3_FG003	GO:0003676
AC199064.3_FG005	GO:0016020,GO:0015171,GO:0003333
AC199068.2_FG017	GO:0043531
AC199086.2_FG006	GO:0005975,GO:0004553
AC199175.2_FG006	GO:0006412,GO:0005840,GO:0005622,GO:0003735
AC199198.3_FG005	GO:0005543
AC199314.3_FG002	GO:0003677
AC199315.4_FG001	GO:0006886,GO:0005784
AC199343.3_FG013	GO:0045454,GO:0015035,GO:0009055
AC199439.4_FG005	GO:0006468,GO:0005524,GO:0004672
AC199487.4_FG002	GO:0009611,GO:0004867
AC199487.4_FG003	GO:0009611,GO:0004867
AC199487.4_FG004	GO:0009611,GO:0004867
AC199488.4_FG003	GO:0009611,GO:0004867
AC199488.4_FG004	GO:0009611,GO:0004867
AC199526.5_FG002	GO:0006556,GO:0004478,GO:0005524
AC199526.5_FG003	GO:0003723
AC199541.4_FG001	GO:0016758,GO:0008152
AC199541.4_FG002	GO:0016758,GO:0008152
AC199541.4_FG004	GO:0016758,GO:0008152
AC199541.4_FG007	GO:0016758,GO:0008152
AC199554.2_FG003	GO:0055085,GO:0016020,GO:0006810,GO:0005215
AC199571.3_FG004	GO:0045454
AC199572.3_FG001	GO:0006468,GO:0004672
AC199765.4_FG008	GO:0005975,GO:0004553
AC199782.5_FG001	GO:0016887,GO:0005524
AC199782.5_FG002	GO:0008299,GO:0004421
AC199810.3_FG003	GO:0006468,GO:0005524,GO:0004672
AC199826.4_FG003	GO:0006355
AC199884.4_FG007	GO:0009982,GO:0009451,GO:0003723,GO:0001522,GO:0008168
AC199908.4_FG003	GO:0047262
AC199911.5_FG001	GO:0042626
AC199917.4_FG003	GO:0006468,GO:0004672
AC200057.4_FG007	GO:0043565,GO:0006355,GO:0003700
AC200099.4_FG006	GO:0055114,GO:0020037,GO:0016705,GO:0005506
AC200108.4_FG003	GO:0016021
AC200112.4_FG007	GO:0008270
AC200211.3_FG008	GO:0006468,GO:0005524,GO:0004672
AC200215.3_FG002	GO:0016758,GO:0008152
AC200298.4_FG001	GO:0046872,GO:0030001
AC200493.4_FG001	GO:0004553
AC200753.3_FG003	GO:0005515
AC201774.3_FG003	GO:0007275,GO:0006355,GO:0003700
AC201894.4_FG007	GO:0046488,GO:0016307,GO:0005524
AC201911.3_FG010	GO:0009982,GO:0009451,GO:0003723,GO:0001522
AC202069.3_FG002	GO:0055114,GO:0020037,GO:0016705,GO:0005506
AC202073.4_FG001	GO:0006950,GO:0005516
AC202110.3_FG004	GO:0016887,GO:0005524
AC202120.3_FG003	GO:0006433,GO:0005737,GO:0005524,GO:0004827,GO:0000166
AC202139.3_FG008	GO:0005524,GO:0003676
AC202386.3_FG002	GO:0030117,GO:0016192,GO:0006886,GO:0005198,GO:0030126,GO:0005515
AC202391.4_FG002	GO:0008270,GO:0003676
AC202435.3_FG003	GO:0016787
AC202439.3_FG006	GO:0055085,GO:0016020,GO:0006810,GO:0005215
AC202561.3_FG009	GO:0055114,GO:0020037,GO:0016705,GO:0005506
AC202707.3_FG002	GO:0006511,GO:0005622,GO:0004843
AC202864.3_FG002	GO:0043565,GO:0008270,GO:0006355,GO:0003700
AC202867.3_FG008	GO:0046872,GO:0030001
AC202895.3_FG002	GO:0005524,GO:0004003,GO:0003677
AC203019.3_FG001	GO:0030246,GO:0016020,GO:0008378,GO:0006486
AC203031.3_FG002	GO:0016592,GO:0006357,GO:0001104
AC203041.3_FG005	GO:0055114,GO:0020037,GO:0006979,GO:0004601
AC203051.3_FG003	GO:0016747,GO:0016020,GO:0006633
AC203159.3_FG010	GO:0009055
AC203173.3_FG001	GO:0005515
AC203173.3_FG002	GO:0005515,GO:0006468,GO:0005524,GO:0004672
AC203173.3_FG003	GO:0055114,GO:0006102,GO:0004450
AC203173.3_FG004	GO:0005525
AC203257.2_FG003	GO:0008270
AC203280.3_FG001	GO:0003676
AC203294.3_FG001	GO:0006468,GO:0004672
AC203334.2_FG001	GO:0016021,GO:0016020,GO:0022857
AC203352.3_FG001	GO:0042398,GO:0004357
AC203362.4_FG012	GO:0042545,GO:0030599,GO:0005618
AC203408.4_FG003	GO:0005975,GO:0004553
AC203424.3_FG001	GO:0072546
AC203535.4_FG002	GO:0006355,GO:0003677
AC203535.4_FG007	GO:0006468,GO:0004672
AC203535.4_FG009	GO:0016987,GO:0006355,GO:0006352,GO:0003700,GO:0003677
AC203581.4_FG001	GO:0045735
AC203752.5_FG002	GO:0006418,GO:0005524,GO:0004812,GO:0000166
AC203753.4_FG006	GO:0005975,GO:0004553
AC203761.3_FG002	GO:0006265,GO:0003916,GO:0003677,GO:0003917
AC203768.3_FG005	GO:0006508,GO:0004222
AC203862.4_FG001	GO:0008233,GO:0006508
AC203900.3_FG006	GO:0005515
AC203909.3_FG003	GO:0055114,GO:0050660,GO:0016491
AC203909.3_FG007	GO:0055114,GO:0050660,GO:0016491
AC203956.3_FG004	GO:0015031,GO:0006457
AC203957.3_FG004	GO:0043565,GO:0006355,GO:0003700
AC203966.5_FG005	GO:0055114,GO:0016491
AC203966.5_FG006	GO:0005975,GO:0004553
AC203972.3_FG001	GO:0043531
AC203972.3_FG002	GO:0006468,GO:0004672
AC203985.4_FG001	GO:0055085,GO:0016021
AC203985.4_FG005	GO:0051082,GO:0016272,GO:0006457
AC203989.4_FG001	GO:0055114,GO:0016702
AC204070.3_FG004	GO:0016459,GO:0005524,GO:0003774
AC204277.3_FG006	GO:0008168
AC204292.4_FG003	GO:0005515
AC204292.4_FG006	GO:0006508,GO:0004252
AC204306.3_FG007	GO:0008270,GO:0005515
AC204382.3_FG010	GO:0006355,GO:0005634,GO:0003700
AC204407.3_FG004	GO:0043531
AC204502.4_FG006	GO:0003677
AC204512.3_FG002	GO:0006355,GO:0003700
AC204530.4_FG003	GO:0005544,GO:0005509
AC204530.4_FG006	GO:0046488,GO:0016307
AC204563.3_FG011	GO:0070652,GO:0051225
AC204625.4_FG001	GO:0016747,GO:0008610,GO:0016020,GO:0006633
AC204641.5_FG001	GO:0005515
AC204641.5_FG003	GO:0008234,GO:0006508
AC204659.3_FG005	GO:0008380,GO:0005681
AC204711.3_FG002	GO:0005975,GO:0004553
AC204763.2_FG001	GO:0005515
AC204821.3_FG004	GO:0016758,GO:0008152
AC204868.3_FG004	GO:0005515
AC204940.3_FG008	GO:0005543
AC205006.3_FG001	GO:0055114,GO:0016491
AC205008.4_FG002	GO:0046872,GO:0000166
AC205012.3_FG002	GO:0005515,GO:0016773
AC205039.4_FG002	GO:0016021
AC205113.3_FG001	GO:0006355,GO:0005667,GO:0003700
AC205122.4_FG003	GO:0005515
AC205154.3_FG005	GO:0055114,GO:0020037,GO:0006979,GO:0004601
AC205251.3_FG002	GO:0008270
AC205413.4_FG001	GO:0055114,GO:0020037,GO:0006979,GO:0004601
AC205413.4_FG002	GO:0055114,GO:0020037,GO:0006979,GO:0004601
AC205413.4_FG003	GO:0055114,GO:0020037,GO:0006979,GO:0004601
AC205471.4_FG003	GO:0043565,GO:0006355,GO:0005634,GO:0003700
AC205471.4_FG008	GO:0005515
AC205475.2_FG003	GO:0016758,GO:0008152
AC205502.4_FG004	GO:0016829,GO:0010333,GO:0008152,GO:0000287
AC205562.3_FG002	GO:0043565,GO:0006355,GO:0003700
AC205608.4_FG004	GO:0016020,GO:0006810,GO:0005215
AC205677.3_FG001	GO:0030117,GO:0016192,GO:0006886,GO:0030123
AC205703.4_FG001	GO:0005515
AC205703.4_FG002	GO:0034314,GO:0007015,GO:0005885,GO:0005524
AC205886.3_FG001	GO:0006412,GO:0005840,GO:0005622,GO:0003735
AC205909.3_FG001	GO:0043531
AC205976.3_FG004	GO:0008270,GO:0005515
AC206030.4_FG001	GO:0055085,GO:0016020,GO:0015297,GO:0015238,GO:0006855
AC206165.3_FG007	GO:0043565,GO:0006355,GO:0005634,GO:0003700
AC206175.3_FG003	GO:0008152,GO:0003824
AC206184.4_FG002	GO:0016021
AC206223.3_FG004	GO:0008440,GO:0005515
AC206223.3_FG006	GO:0006468,GO:0005524,GO:0004672
AC206223.3_FG008	GO:0005515
AC206246.3_FG003	GO:0005634,GO:0003677
AC206266.3_FG001	GO:0016887,GO:0005524,GO:0055085,GO:0042626,GO:0016021,GO:0006810
AC206321.3_FG002	GO:0006412,GO:0005840,GO:0005622,GO:0003735
AC206332.3_FG005	GO:0030246,GO:0016020,GO:0008378,GO:0006486
AC206425.3_FG004	GO:0006468,GO:0005524,GO:0004672
AC206627.3_FG001	GO:0008017,GO:0007018,GO:0005524,GO:0003777,GO:0005871
AC206634.3_FG004	GO:0005515,GO:0007264,GO:0005525
AC206642.4_FG001	GO:0006412,GO:0005840,GO:0005622,GO:0003735
AC206768.3_FG005	GO:0008270,GO:0005515
AC206780.3_FG004	GO:0008270,GO:0003676
AC206788.3_FG015	GO:0016758,GO:0008152
AC206790.3_FG001	GO:0055114,GO:0016616,GO:0006694,GO:0003854
AC206831.3_FG015	GO:0005515
AC206845.3_FG004	GO:0055114,GO:0016491
AC206868.3_FG004	GO:0007275,GO:0006355,GO:0003700
AC206941.2_FG002	GO:0016021,GO:0012511
AC206951.3_FG016	GO:0006355,GO:0003700
AC206951.3_FG017	GO:0006355,GO:0003700
AC206968.3_FG003	GO:0005515
AC206989.4_FG002	GO:0016567,GO:0004842
AC206999.1_FG007	GO:0009611,GO:0004867
AC207008.3_FG005	GO:0006890,GO:0005198
AC207043.3_FG004	GO:0016787
AC207265.3_FG002	GO:0005543
AC207323.3_FG015	GO:0005992,GO:0003824
AC207347.3_FG005	GO:0055085,GO:0016021,GO:0022857
AC207628.4_FG005	GO:0055085,GO:0005741
AC207628.4_FG010	GO:0008168,GO:0008152
AC207628.4_FG011	GO:0005515
AC207656.3_FG002	GO:0003677,GO:0009725,GO:0006355,GO:0005634
AC207678.4_FG002	GO:0003677
AC207722.2_FG009	GO:0016020,GO:0009765
AC207755.3_FG005	GO:0055085,GO:0016020,GO:0006810,GO:0015171,GO:0003333
AC207803.3_FG004	GO:0008017,GO:0000910,GO:0000226
AC207814.3_FG003	GO:0008289
AC207880.3_FG002	GO:0005524
AC207884.3_FG002	GO:0030163,GO:0005524,GO:0004252,GO:0004176
AC207890.3_FG002	GO:0035194,GO:0003712
AC208023.3_FG001	GO:0016020,GO:0006886,GO:0006605
AC208110.2_FG001	GO:0043565,GO:0006355,GO:0003700
AC208110.2_FG005	GO:0016020,GO:0006810,GO:0005215
AC208110.2_FG011	GO:0016020,GO:0006810,GO:0005215
AC208201.3_FG002	GO:0003824,GO:0006470,GO:0004722
AC208201.3_FG003	GO:0050826
AC208221.3_FG002	GO:0005576,GO:0004867
AC208327.4_FG003	GO:0005515
AC208327.4_FG006	GO:0016020,GO:0008375
AC208337.2_FG003	GO:0006412,GO:0005840,GO:0005622,GO:0003735
AC208338.3_FG010	GO:0016021,GO:0006888,GO:0005801,GO:0000139
AC208341.4_FG007	GO:0055114,GO:0020037,GO:0006979,GO:0004601
AC208346.3_FG004	GO:0006887,GO:0000145
AC208406.3_FG002	GO:0055114,GO:0016491,GO:0051568,GO:0016575,GO:0005634
AC208411.3_FG013	GO:0008234,GO:0006508
AC208418.3_FG009	GO:0006887,GO:0000145
AC208422.3_FG001	GO:0030915,GO:0006281
AC208422.3_FG002	GO:0030915,GO:0006281
AC208440.3_FG004	GO:0005515
AC208445.3_FG001	GO:0009611,GO:0004867
AC208445.3_FG006	GO:0009611,GO:0004867
AC208521.3_FG002	GO:0042393,GO:0006355
AC208559.3_FG003	GO:0005515
AC208564.3_FG004	GO:0006355,GO:0005634,GO:0003700
AC208641.3_FG005	GO:0016020,GO:0015696,GO:0008519,GO:0072488
AC208641.3_FG008	GO:0016020,GO:0015696,GO:0008519,GO:0072488
AC208663.3_FG002	GO:0006355,GO:0003677
AC208788.3_FG005	GO:0043631,GO:0005634,GO:0004652
AC208838.3_FG002	GO:0052726,GO:0052725,GO:0047325,GO:0032957,GO:0005622,GO:0005524,GO:0000287
AC208860.3_FG002	GO:0006468,GO:0004672
AC208897.3_FG004	GO:0055085,GO:0016021,GO:0022857
AC208915.3_FG010	GO:0016020,GO:0009765
AC208985.3_FG006	GO:0009055
AC209019.3_FG003	GO:0005524,GO:0003676
AC209050.3_FG001	GO:0046872,GO:0000166
AC209050.3_FG003	GO:0043565,GO:0006355,GO:0003700
AC209169.3_FG007	GO:0019205,GO:0006139,GO:0005524
AC209206.3_FG011	GO:0005515,GO:0003676
AC209206.3_FG014	GO:0055114,GO:0004097,GO:0016491,GO:0008152
AC209208.3_FG001	GO:0006468,GO:0005524,GO:0004672
AC209208.3_FG002	GO:0016020,GO:0006810,GO:0005215
AC209208.3_FG003	GO:0006508,GO:0004252
AC209215.4_FG004	GO:0055085,GO:0005741
AC209242.3_FG003	GO:0008233,GO:0006508,GO:0042765,GO:0016255,GO:0003923
AC209249.2_FG015	GO:0003824,GO:0006470,GO:0004722
AC209257.4_FG003	GO:0045454,GO:0015035,GO:0009055
AC209257.4_FG006	GO:0006355,GO:0003700
AC209332.3_FG011	GO:0003677
AC209374.4_FG002	GO:0016114,GO:0008685
AC209374.4_FG007	GO:0016787
AC209381.3_FG002	GO:0008270,GO:0005515
AC209381.3_FG007	GO:0008270,GO:0005515
AC209381.3_FG008	GO:0008270,GO:0005515
AC209434.4_FG001	GO:0005975,GO:0004553
AC209621.2_FG002	GO:0005515
AC209626.2_FG013	GO:0033014,GO:0004852
AC209664.3_FG002	GO:0016757,GO:0047262
AC209696.3_FG002	GO:0007275,GO:0006355,GO:0003700
AC209738.3_FG005	GO:0016758,GO:0008152
AC209739.3_FG003	GO:0005515
AC209744.3_FG001	GO:0006950
AC209765.3_FG001	GO:0009611,GO:0004867
AC209765.3_FG002	GO:0009611,GO:0004867
AC209768.3_FG005	GO:0005634
AC209768.3_FG016	GO:0055114,GO:0050661,GO:0050660,GO:0004499
AC209810.3_FG002	GO:0008234,GO:0006508
AC209819.3_FG005	GO:0046983,GO:0008171
AC209819.3_FG007	GO:0005515
AC209819.3_FG009	GO:0006355,GO:0003677
AC209819.3_FG012	GO:0007264,GO:0005525
AC209853.2_FG001	GO:0055114,GO:0020037,GO:0016705,GO:0005506
AC209858.4_FG002	GO:0005515
AC209858.4_FG004	GO:0008080
AC209860.3_FG002	GO:0006418,GO:0005524,GO:0004812,GO:0000166
AC209860.3_FG004	GO:0055114,GO:0004616
AC209946.4_FG001	GO:0008234,GO:0006508
AC209972.4_FG005	GO:0006468,GO:0004672
AC209987.4_FG002	GO:0055114,GO:0020037,GO:0016705,GO:0005506
AC209987.4_FG004	GO:0008408,GO:0006260,GO:0003887,GO:0003677,GO:0000166
AC209987.4_FG010	GO:0009055
AC210003.2_FG004	GO:0055114,GO:0020037,GO:0006979,GO:0004601
AC210005.3_FG001	GO:0006468,GO:0005524,GO:0004672
AC210013.4_FG002	GO:0009055
AC210013.4_FG003	GO:0008168,GO:0008152,GO:0006694
AC210013.4_FG005	GO:0008033
AC210013.4_FG006	GO:0016491,GO:0008152
AC210013.4_FG008	GO:0016973,GO:0005643
AC210013.4_FG011	GO:0003824
AC210013.4_FG012	GO:0016021
AC210013.4_FG014	GO:0006468,GO:0004672
AC210013.4_FG017	GO:0005975,GO:0004650
AC210013.4_FG019	GO:0006412,GO:0005840,GO:0003735,GO:0003723
AC210023.3_FG014	GO:0055085,GO:0016020,GO:0006821,GO:0005247
AC210067.3_FG005	GO:0003676
AC210173.4_FG002	GO:0005515,GO:0003677
AC210173.4_FG005	GO:0055114,GO:0020037,GO:0016705,GO:0005506
AC210202.3_FG007	GO:0006468,GO:0005524,GO:0004672
AC210204.3_FG002	GO:0005515
AC210312.3_FG005	GO:0007017,GO:0005874
AC210317.4_FG005	GO:0003779
AC210317.4_FG007	GO:0007017,GO:0005874
AC210379.2_FG006	GO:0055114,GO:0050661,GO:0050660,GO:0004499
AC210410.3_FG004	GO:0046872,GO:0030001
AC210595.3_FG004	GO:0051716,GO:0046658
AC210596.3_FG001	GO:0016579,GO:0004843
AC210596.3_FG003	GO:0030247
AC210596.3_FG004	GO:0005509,GO:0006468,GO:0005524,GO:0004672
AC210598.3_FG003	GO:0046938,GO:0046872,GO:0016756,GO:0010038
AC210607.3_FG005	GO:0006508,GO:0004190
AC210616.4_FG003	GO:0055085,GO:0016021
AC210669.3_FG001	GO:0048046,GO:0016762,GO:0006073,GO:0005618,GO:0005975,GO:0004553
AC210724.2_FG007	GO:0008234,GO:0006508
AC210727.4_FG002	GO:0043968,GO:0043967,GO:0035267,GO:0006338,GO:0006281
AC210792.5_FG001	GO:0055114,GO:0016491,GO:0019752,GO:0016616
AC210792.5_FG003	GO:0006351,GO:0003899,GO:0003677
AC210816.3_FG005	GO:0042147,GO:0030904,GO:0015031,GO:0008565
AC210848.3_FG006	GO:0003824,GO:0006470,GO:0004722
AC211164.5_FG001	GO:0016020
AC211164.5_FG004	GO:0055114,GO:0020037,GO:0006979,GO:0004601
AC211175.3_FG005	GO:0006468,GO:0005524,GO:0004672
AC211190.4_FG002	GO:0043531
AC211190.4_FG004	GO:0008270,GO:0005515
AC211192.3_FG003	GO:0009432,GO:0006281,GO:0005524,GO:0003697
AC211276.4_FG008	GO:0016020,GO:0008375
AC211327.4_FG006	GO:0003676
AC211349.4_FG001	GO:0008033,GO:0006432,GO:0005524,GO:0004826,GO:0000287,GO:0000049,GO:0043039,GO:0005737,GO:0004812
AC211349.4_FG002	GO:0003924,GO:0007017,GO:0005874
AC211357.4_FG004	GO:0006415,GO:0003747,GO:0016149,GO:0005737
AC211390.3_FG001	GO:0008168
AC211394.4_FG004	GO:0016787
AC211411.4_FG004	GO:0016758,GO:0008152
AC211446.2_FG010	GO:0006508,GO:0004190
AC211467.4_FG002	GO:0008124,GO:0006729
AC211478.3_FG004	GO:0006355,GO:0003677
AC211513.3_FG002	GO:0006412,GO:0005840,GO:0003735
AC211652.4_FG002	GO:0005515
AC211652.4_FG003	GO:0005975,GO:0004553
AC211704.3_FG003	GO:0016020,GO:0015696,GO:0008519,GO:0072488
AC211737.3_FG012	GO:0006508,GO:0004252
AC211738.4_FG005	GO:0008234,GO:0006508
AC211913.3_FG001	GO:0008270,GO:0006355,GO:0006352,GO:0006384,GO:0000126
AC211940.4_FG001	GO:0008270,GO:0003676
AC211965.4_FG003	GO:0006281
AC211995.4_FG004	GO:0003677
AC212023.4_FG004	GO:0004857
AC212068.4_FG005	GO:0016788
AC212112.4_FG002	GO:0005515
AC212184.3_FG010	GO:0006412,GO:0005840,GO:0003735
AC212219.3_FG005	GO:0055114,GO:0016491
AC212227.3_FG006	GO:0008168,GO:0008033,GO:0006364,GO:0003723
AC212353.4_FG004	GO:0008270,GO:0005515
AC212353.4_FG006	GO:0006508,GO:0004185
AC212394.4_FG010	GO:0006468,GO:0005524,GO:0004672
AC212404.3_FG006	GO:0005975,GO:0004553
AC212449.4_FG001	GO:0005634
AC212449.4_FG002	GO:0005634
AC212449.4_FG004	GO:0005634
AC212449.4_FG006	GO:0005634
AC212451.4_FG009	GO:0042545,GO:0030599,GO:0005618
AC212570.3_FG006	GO:0005515,GO:0006364,GO:0005730
AC212728.3_FG001	GO:0005576,GO:0004867
AC212823.4_FG003	GO:0006468,GO:0005524,GO:0004672,GO:0055114,GO:0050662,GO:0015936,GO:0004420,GO:0046983,GO:0003677
AC212835.3_FG002	GO:0009055
AC212835.3_FG007	GO:0016788
AC212835.3_FG008	GO:0006468,GO:0005524,GO:0004672
AC212859.3_FG008	GO:0006355,GO:0003677
AC212976.3_FG003	GO:0008270,GO:0005515
AC212978.4_FG005	GO:0016747
AC212979.2_FG006	GO:0003723
AC213050.3_FG001	GO:0006397
AC213094.3_FG003	GO:0003824,GO:0006470,GO:0004722
AC213398.3_FG002	GO:0055114,GO:0016491
AC213398.3_FG006	GO:0019205,GO:0006139,GO:0005524
AC213432.2_FG004	GO:0004857
AC213455.3_FG008	GO:0006508,GO:0004222
AC213463.3_FG002	GO:0032783,GO:0006355
AC213521.3_FG005	GO:0055114,GO:0050661,GO:0033014,GO:0008883
AC213600.3_FG002	GO:0006491
AC213612.3_FG002	GO:0006412,GO:0005840,GO:0005622,GO:0003735
AC213615.3_FG001	GO:0003676
AC213654.3_FG001	GO:0008270,GO:0005515
AC213654.3_FG004	GO:0005515
AC213666.3_FG003	GO:0006355,GO:0003700
AC213693.3_FG003	GO:0006096,GO:0003872
AC213769.3_FG001	GO:0043531
AC213884.3_FG001	GO:0046907
AC213890.4_FG004	GO:0006468,GO:0005524,GO:0004672
AC214040.3_FG009	GO:0006468,GO:0004672,GO:0030246
AC214168.3_FG001	GO:0006355,GO:0005667,GO:0003700
AC214227.4_FG013	GO:0008270,GO:0005515
AC214256.3_FG005	GO:0030598,GO:0017148
AC214266.3_FG002	GO:0016021,GO:0008643,GO:0005351,GO:0000139
AC214350.3_FG007	GO:0055114,GO:0051537,GO:0016491,GO:0008121,GO:0016679
AC214360.3_FG001	GO:0016829,GO:0010333,GO:0008152,GO:0000287
AC214448.3_FG007	GO:0016021
AC214507.3_FG001	GO:0003723
AC214524.3_FG002	GO:0055114,GO:0020037,GO:0016705,GO:0005506
AC214602.3_FG012	GO:0005515
AC214635.3_FG002	GO:0005515
AC214640.3_FG003	GO:0006412,GO:0005840,GO:0005622,GO:0003735
AC214648.3_FG003	GO:0016021
AC214743.3_FG001	GO:0006468,GO:0004672
AC214743.3_FG002	GO:0006468,GO:0005524,GO:0004672
AC214771.3_FG002	GO:0008270,GO:0005515
AC214771.3_FG003	GO:0016020,GO:0008375
AC214817.3_FG004	GO:0005515,GO:0006468,GO:0004672
AC215181.3_FG003	GO:0016020
AC215181.3_FG004	GO:0006468,GO:0004672
AC215201.3_FG003	GO:0006468,GO:0004672
AC215201.3_FG005	GO:0005524
AC215249.3_FG007	GO:0005524
AC215260.3_FG003	GO:0016747
AC215300.3_FG006	GO:0006508,GO:0004190
AC215311.3_FG002	GO:0003676
AC215639.3_FG002	GO:0055114,GO:0016491
AC215678.3_FG008	GO:0055085
AC215690.3_FG002	GO:0055114,GO:0045300,GO:0006631
AC215811.3_FG003	GO:0005515
AC215864.3_FG010	GO:0005740,GO:0004129
AC215909.3_FG001	GO:0006355,GO:0003700
AC216010.3_FG001	GO:0009982,GO:0009451,GO:0003723,GO:0001522
AC216045.2_FG005	GO:0044030,GO:0005634
AC216067.3_FG002	GO:0033177,GO:0015991,GO:0015078
AC216188.3_FG003	GO:0016020,GO:0015171,GO:0003333
AC216219.3_FG006	GO:0006508,GO:0005524,GO:0004222
AC216247.3_FG001	GO:0043565,GO:0006355,GO:0005634,GO:0003700
AC216247.3_FG005	GO:0006457
AC216251.3_FG003	GO:0005524
AC216253.3_FG005	GO:0003676
AC216264.3_FG001	GO:0006508,GO:0004185
AC216353.2_FG005	GO:0006796,GO:0005737,GO:0004427,GO:0000287
AC216369.3_FG002	GO:0055114,GO:0020037,GO:0016705,GO:0005506
AC216731.3_FG001	GO:0046983
AC216731.3_FG002	GO:0055085,GO:0016021,GO:0015299,GO:0006812
AC216793.3_FG008	GO:0016021,GO:0005215
AC216869.3_FG001	GO:0070569,GO:0008152
AC216871.3_FG001	GO:0016757
AC216871.3_FG004	GO:0016757
AC216887.3_FG005	GO:0008270,GO:0003676
AC217043.3_FG002	GO:0005524,GO:0003676
AC217043.3_FG007	GO:0003676
AC217050.4_FG004	GO:0003682
AC217050.4_FG006	GO:0019904
AC217050.4_FG007	GO:0016829,GO:0010333,GO:0008152,GO:0000287
AC217121.3_FG007	GO:0055085,GO:0016021,GO:0008324,GO:0006812
AC217255.3_FG002	GO:0006468,GO:0004672
AC217264.3_FG001	GO:0005634,GO:0003677
AC217288.3_FG005	GO:0005634,GO:0003677
AC217293.3_FG002	GO:0043531
AC217293.3_FG007	GO:0030247,GO:0006468,GO:0004672
AC217300.3_FG004	GO:0006468,GO:0004672
AC217300.3_FG005	GO:0042254,GO:0005622
AC217311.3_FG007	GO:0045454,GO:0005783
AC217348.4_FG004	GO:0055114,GO:0016620
AC217351.3_FG005	GO:0030163,GO:0005524,GO:0004252,GO:0004176
AC217358.3_FG002	GO:0043531
AC217358.3_FG003	GO:0017183
AC217358.3_FG005	GO:0016020
AC217358.3_FG007	GO:0016491,GO:0008152
AC217358.3_FG008	GO:0005525
AC217358.3_FG009	GO:0005525
AC217358.3_FG011	GO:0016021,GO:0015031,GO:0008565
AC217401.3_FG001	GO:0005975,GO:0004553
AC217401.3_FG002	GO:0005975,GO:0004553
AC217401.3_FG003	GO:0006468,GO:0005524,GO:0004672
AC217553.3_FG008	GO:0003968
AC217553.3_FG009	GO:0003968
AC217556.3_FG003	GO:0003676
AC217665.3_FG005	GO:0005525
AC217811.3_FG003	GO:0030170,GO:0019752,GO:0016831
AC217842.3_FG001	GO:0006468,GO:0004672,GO:0005524
AC217887.3_FG001	GO:0003824
AC217887.3_FG003	GO:0008270,GO:0005515
AC217887.3_FG004	GO:0005975,GO:0004553
AC217887.3_FG005	GO:0005515
AC217910.3_FG001	GO:0046872,GO:0030001
AC217947.4_FG002	GO:0055114,GO:0016491,GO:0010181
AC217966.3_FG007	GO:0005634
AC218457.2_FG013	GO:0005515
AC218932.3_FG009	GO:0006351,GO:0005634,GO:0003677
AC218939.2_FG004	GO:0006468,GO:0005524,GO:0004672
AC218959.1_FG001	GO:0005509
AC218972.3_FG001	GO:0006468,GO:0005524,GO:0004672
AC218972.3_FG004	GO:0005515,GO:0006468,GO:0004672
AC218988.3_FG003	GO:0006887,GO:0000145
AC218998.2_FG001	GO:0055114,GO:0020037,GO:0016705,GO:0005506
AC218998.2_FG007	GO:0006468,GO:0005524,GO:0004672
AC218998.2_FG011	GO:0016829,GO:0010333,GO:0000287,GO:0008152
AC219006.2_FG004	GO:0043631,GO:0005634,GO:0004652
AC219006.2_FG006	GO:0055085
AC219006.2_FG007	GO:0033063,GO:0006281,GO:0003677,GO:0000724
AC220970.4_FG001	GO:0008017,GO:0007018,GO:0005524,GO:0003777,GO:0005871
AC220972.3_FG001	GO:0008270,GO:0005515
AC225147.4_FG002	GO:0006412,GO:0005840,GO:0005622,GO:0003735
AC225147.4_FG003	GO:0005515,GO:0042393,GO:0006355
AC225176.2_FG006	GO:0016817
AC225179.3_FG003	GO:0005515
AC225185.3_FG003	GO:0055114,GO:0051287,GO:0016616,GO:0000287
AC225193.3_FG001	GO:0006351,GO:0005634,GO:0003700,GO:0043565,GO:0006355
AC225205.3_FG003	GO:0016773
AC225222.2_FG004	GO:0009611,GO:0004867
AC225309.2_FG003	GO:0022900,GO:0016021
AC225342.3_FG001	GO:0006412,GO:0005840,GO:0005622,GO:0003735,GO:0005634,GO:0003677
AC225363.3_FG004	GO:0006468,GO:0004672
AC225365.3_FG004	GO:0006396,GO:0009982,GO:0009451,GO:0003723,GO:0001522
AC225555.3_FG005	GO:0000723
AC225716.2_FG003	GO:0008234,GO:0006508
AC225716.2_FG004	GO:0008234,GO:0006508
AC225716.2_FG006	GO:0008234,GO:0006508
AC226221.2_FG011	GO:0045454,GO:0015035,GO:0009055
AC226227.2_FG007	GO:0005096
AC226235.2_FG001	GO:0055114,GO:0016616,GO:0006694,GO:0003854
AC226248.1_FG002	GO:0006468,GO:0005524,GO:0004672
AC226323.2_FG001	GO:0008565,GO:0006606,GO:0005737,GO:0005634
AC226723.2_FG001	GO:0055114,GO:0004471
AC230011.2_FG002	GO:0043531
AC230013.2_FG002	GO:0055114,GO:0020037,GO:0006979,GO:0004601
AC230013.2_FG007	GO:0006412,GO:0005840,GO:0003735
AC230017.2_FG008	GO:0005515
AC230017.2_FG009	GO:0005515
AC230023.2_FG002	GO:0006351,GO:0005634,GO:0003677
AC230023.2_FG003	GO:0006351,GO:0005634,GO:0003677
AC230023.2_FG004	GO:0006351,GO:0005634,GO:0003677
AC231180.2_FG001	GO:0008270
AC231411.1_FG011	GO:0006629
AC231426.1_FG002	GO:0042545,GO:0030599,GO:0005618
AC231745.1_FG003	GO:0016788
AC231745.1_FG004	GO:0016021,GO:0008146
AC231747.1_FG001	GO:0016192,GO:0006886
AC232238.2_FG004	GO:0043565,GO:0006355,GO:0003700,GO:0006351
AC232238.2_FG005	GO:0051536,GO:0009055
AC232289.2_FG003	GO:0005515
AC233751.1_FG002	GO:0005634,GO:0003677
AC233785.2_FG005	GO:0006351,GO:0005634,GO:0003677
AC233788.2_FG001	GO:0055085,GO:0042626,GO:0016021,GO:0006810,GO:0005524
AC233850.1_FG002	GO:0004857
AC233850.1_FG003	GO:0004857
AC233850.1_FG005	GO:0006355,GO:0005667,GO:0003700
AC233851.1_FG016	GO:0055114,GO:0016491,GO:0005507
AC233851.1_FG017	GO:0055114,GO:0004097,GO:0016491,GO:0008152
AC233853.1_FG002	GO:0043565,GO:0006355,GO:0003700
AC233853.1_FG003	GO:0055114,GO:0020037,GO:0016705,GO:0005506
AC233854.1_FG002	GO:0005524
AC233855.1_FG003	GO:0006355
AC233855.1_FG006	GO:0008235,GO:0006508,GO:0004177
AC233859.1_FG001	GO:0006468,GO:0005524,GO:0004672
AC233861.1_FG001	GO:0006468,GO:0005524,GO:0004672,GO:0005515
AC233864.1_FG010	GO:0006468,GO:0005524,GO:0004672
AC233864.1_FG012	GO:0006468,GO:0004672,GO:0004674
AC233865.1_FG003	GO:0006355,GO:0003677
AC233865.1_FG004	GO:0016567,GO:0004842
AC233866.1_FG006	GO:0005525
AC233866.1_FG008	GO:0007018,GO:0005871,GO:0003777
AC233867.1_FG004	GO:0003676
AC233870.1_FG006	GO:0005737,GO:0005634
AC233871.1_FG003	GO:0006468,GO:0004672
AC233871.1_FG005	GO:0006468,GO:0004672
AC233871.1_FG008	GO:0046872
AC233872.1_FG003	GO:0005759
AC233878.1_FG004	GO:0046872,GO:0000166
AC233880.1_FG004	GO:0003723
AC233880.1_FG009	GO:0006412,GO:0005840,GO:0005622,GO:0003735
AC233882.1_FG003	GO:0016887,GO:0005524,GO:0055085,GO:0042626,GO:0016021,GO:0006810
AC233887.1_FG005	GO:0015743
AC233888.1_FG002	GO:0008270,GO:0005622,GO:0005515
AC233893.1_FG003	GO:0016747,GO:0008610,GO:0016020,GO:0006633
AC233893.1_FG006	GO:0006468,GO:0005524,GO:0004672
AC233899.1_FG002	GO:0046983
AC233899.1_FG004	GO:0043565,GO:0006355,GO:0003700,GO:0003677
AC233900.1_FG002	GO:0055114,GO:0010309
AC233904.1_FG003	GO:0008234,GO:0006508
AC233910.1_FG003	GO:0005515,GO:0006412,GO:0005840,GO:0003735
AC233910.1_FG010	GO:0006468,GO:0005524,GO:0004672
AC233912.1_FG001	GO:0006355,GO:0005634,GO:0003700,GO:0046983,GO:0003677
AC233916.1_FG002	GO:0006629
AC233922.1_FG003	GO:0055114,GO:0016491,GO:0008152
AC233922.1_FG005	GO:0055114,GO:0009396,GO:0004488,GO:0003824
AC233933.1_FG001	GO:0006355,GO:0003700
AC233935.1_FG005	GO:0006355,GO:0003677
AC233939.1_FG003	GO:0050999
AC233940.1_FG003	GO:0006508,GO:0004185
AC233942.1_FG001	GO:0005515
AC233945.1_FG003	GO:0055085,GO:0016020,GO:0015297,GO:0015238,GO:0006855
AC233946.1_FG004	GO:0005515
AC233949.1_FG004	GO:0005524,GO:0009378,GO:0006310,GO:0006281
AC233953.1_FG004	GO:0006468,GO:0005524,GO:0004672
AC233953.1_FG005	GO:0071805,GO:0016020,GO:0015079
AC233954.1_FG004	GO:0034314,GO:0030833,GO:0005885,GO:0005856
AC233955.1_FG003	GO:0030418,GO:0030410
AC233959.1_FG006	GO:0005516
AC233960.1_FG002	GO:0055114,GO:0009916
AC233960.1_FG005	GO:0046983
AC233961.1_FG001	GO:0034968,GO:0018024,GO:0008270,GO:0005634,GO:0005515,GO:0042393
AC233967.1_FG001	GO:0005515
AC233967.1_FG002	GO:0005615
AC233967.1_FG005	GO:0006468,GO:0004672
AC233979.1_FG009	GO:0019901,GO:0006355,GO:0000079
AC233979.1_FG011	GO:0008270,GO:0005515
AC234091.1_FG001	GO:0005975,GO:0004553
AC234109.1_FG003	GO:0008270,GO:0005515
AC234152.1_FG002	GO:0055085,GO:0016020,GO:0006811,GO:0005216
AC234152.1_FG005	GO:0009341,GO:0005975,GO:0004565,GO:0030246,GO:0004553
AC234152.1_FG007	GO:0055085,GO:0016020,GO:0006811,GO:0005216
AC234154.1_FG007	GO:0008152,GO:0003824
AC234154.1_FG008	GO:0008374,GO:0006629
AC234155.1_FG003	GO:0006412,GO:0005840,GO:0005622,GO:0003735
AC234157.1_FG002	GO:0006412,GO:0005840,GO:0003735
AC234158.1_FG005	GO:0003682,GO:0006351,GO:0005634,GO:0003677
AC234160.1_FG003	GO:0005975,GO:0004553
AC234160.1_FG008	GO:0006355
AC234163.1_FG002	GO:0055114,GO:0016491,GO:0008270
AC234166.1_FG001	GO:0005525
AC234171.1_FG001	GO:0006468,GO:0004672
AC234171.1_FG003	GO:0005543
AC234173.1_FG001	GO:0055114,GO:0050660,GO:0016614
AC234180.1_FG002	GO:0046872
AC234180.1_FG004	GO:0016020,GO:0006810,GO:0005215
AC234183.1_FG002	GO:0051082,GO:0006950,GO:0006457,GO:0005524
AC234185.1_FG004	GO:0016787,GO:0006541,GO:0006221,GO:0003883
AC234185.1_FG006	GO:0046983,GO:0003677
AC234190.1_FG002	GO:0055114,GO:0016491,GO:0005507
AC234193.1_FG001	GO:0006468,GO:0005524,GO:0004672
AC234199.1_FG003	GO:0005515,GO:0016773
AC234201.1_FG003	GO:0055114,GO:0016491,GO:0001735
AC234203.1_FG004	GO:0055085,GO:0042626,GO:0016021,GO:0006810,GO:0005524,GO:0016887
AC234515.1_FG003	GO:0003924,GO:0007017,GO:0005874
AC234517.1_FG001	GO:0005740,GO:0004129
AC234517.1_FG005	GO:0055114,GO:0020037,GO:0016705,GO:0005506,GO:0005815,GO:0000922,GO:0000226
AC234519.1_FG003	GO:0016844,GO:0009058
AC234519.1_FG005	GO:0016844,GO:0009058
AC234524.1_FG005	GO:0016758,GO:0008152
AC234526.1_FG005	GO:0050662,GO:0003824
AC234528.1_FG005	GO:0008152,GO:0003824
AC234528.1_FG006	GO:0055114,GO:0016491
AC235534.1_FG007	GO:0003677,GO:0008289
AC235535.1_FG001	GO:0016787,GO:0005524,GO:0003677,GO:0043044,GO:0031491,GO:0016818,GO:0006338,GO:0005634,GO:0003676
AC235540.1_FG002	GO:0005515,GO:0006468,GO:0004672
AC235543.1_FG002	GO:0055085,GO:0022857,GO:0016021
AC235544.1_FG004	GO:0017119
AC235544.1_FG006	GO:0045735
AC235546.1_FG002	GO:0055114,GO:0016491,GO:0016209
AC235547.1_FG005	GO:0006468,GO:0004672
AF466202.2_FG001	GO:0055114,GO:0004471
AF546187.1_FG001	GO:0045735
AF546187.1_FG002	GO:0045735
AF546187.1_FG007	GO:0045735
AF546187.1_FG009	GO:0045735
AF546187.1_FG011	GO:0055114,GO:0020037,GO:0016705,GO:0005506
AF546188.1_FG001	GO:0045735
AF546188.1_FG002	GO:0045735
AF546188.1_FG003	GO:0045735
AF546188.1_FG005	GO:0045735
AF546188.1_FG006	GO:0045735
AF546188.1_FG007	GO:0045735
AY530952.1_FG001	GO:0055085,GO:0016020
AY530952.1_FG002	GO:0055114,GO:0006788,GO:0004392,GO:0005089
EF517601.1_FG001	GO:0003677,GO:0046983
EF517601.1_FG006	GO:0046872,GO:0030001
EF517601.1_FG009	GO:0046872,GO:0030001
EF517601.1_FG012	GO:0005524
EF517601.1_FG014	GO:0005975,GO:0004134
EF517601.1_FG023	GO:0008270
GRMZM2G000014	GO:0046872
GRMZM2G000047	GO:0071805,GO:0016020,GO:0015079
GRMZM2G000062	GO:0006468,GO:0005524,GO:0004672
GRMZM2G000092	GO:0008152,GO:0003824
GRMZM2G000093	GO:0004518,GO:0003677
GRMZM2G000107	GO:0055114,GO:0020037,GO:0006979,GO:0004601
GRMZM2G000114	GO:0008270,GO:0005515
GRMZM2G000118	GO:0016301
GRMZM2G000124	GO:0008168
GRMZM2G000154	GO:0055114,GO:0050661,GO:0050660,GO:0004499
GRMZM2G000158	GO:0006355,GO:0005634
GRMZM2G000166	GO:0046872,GO:0030001
GRMZM2G000171	GO:0043565,GO:0006355,GO:0003700,GO:0006351
GRMZM2G000195	GO:0005515
GRMZM2G000199	GO:0004869
GRMZM2G000209	GO:0016021,GO:0016020,GO:0022857
GRMZM2G000219	GO:0046872,GO:0030001
GRMZM2G000231	GO:0008236,GO:0006508
GRMZM2G000236	GO:0055114,GO:0016491,GO:0010181
GRMZM2G000242	GO:0005524,GO:0046933,GO:0015986
GRMZM2G000256	GO:0019898,GO:0015979,GO:0009654,GO:0009523,GO:0005509
GRMZM2G000261	GO:0051260
GRMZM2G000278	GO:0006468,GO:0005524,GO:0004672
GRMZM2G000326	GO:0009611,GO:0004867
GRMZM2G000353	GO:0008270,GO:0005515
GRMZM2G000371	GO:0004386
GRMZM2G000376	GO:0016021,GO:0006952
GRMZM2G000393	GO:0016020,GO:0008378,GO:0006486
GRMZM2G000423	GO:0055114,GO:0016491
GRMZM2G000427	GO:0055114,GO:0050661,GO:0050660,GO:0004499
GRMZM2G000471	GO:0016020,GO:0006810,GO:0005215
GRMZM2G000481	GO:0006418,GO:0005524,GO:0004812,GO:0000166
GRMZM2G000520	GO:0006355,GO:0003700
GRMZM2G000527	GO:0055114,GO:0010309
GRMZM2G000531	GO:0055114,GO:0016491,GO:0006633,GO:0005506
GRMZM2G000540	GO:0008270,GO:0005634
GRMZM2G000584	GO:0006468,GO:0005524,GO:0004672
GRMZM2G000587	GO:0016757
GRMZM2G000593	GO:0055085,GO:0016020,GO:0015297,GO:0015238,GO:0006855
GRMZM2G000603	GO:0003824,GO:0006470,GO:0004722
GRMZM2G000608	GO:0005681,GO:0000398,GO:0000387
GRMZM2G000610	GO:0006355,GO:0005739,GO:0003690
GRMZM2G000614	GO:0016887,GO:0005524,GO:0016020
GRMZM2G000620	GO:0048544,GO:0006468,GO:0004672
GRMZM2G000623	GO:0006511
GRMZM2G000632	GO:0055114,GO:0016616,GO:0006694,GO:0003854
GRMZM2G000633	GO:0006468,GO:0004672
GRMZM2G000645	GO:0005515,GO:0030117,GO:0016192,GO:0006886,GO:0005198
GRMZM2G000652	GO:0006629
GRMZM2G000660	GO:0008138,GO:0006470
GRMZM2G000665	GO:0016021,GO:0006810
GRMZM2G000670	GO:0016747
GRMZM2G000686	GO:0006355,GO:0003700
GRMZM2G000706	GO:0005096
GRMZM2G000710	GO:0016020,GO:0008236,GO:0006508
GRMZM2G000719	GO:0005515
GRMZM2G000737	GO:0009073,GO:0003849
GRMZM2G000739	GO:0008168,GO:0008152
GRMZM2G000743	GO:0005634,GO:0003677
GRMZM2G000749	GO:0005622,GO:0003676,GO:0008408,GO:0006139
GRMZM2G000753	GO:0008270
GRMZM2G000764	GO:0008168
GRMZM2G000801	GO:0006412,GO:0005840,GO:0003735
GRMZM2G000816	GO:0016021,GO:0006810
GRMZM2G000823	GO:0005524,GO:0003676
GRMZM2G000825	GO:0005515
GRMZM2G000842	GO:0043565,GO:0006355,GO:0003700,GO:0006351
GRMZM2G000909	GO:0005515
GRMZM2G000932	GO:0016491,GO:0008152
GRMZM2G000936	GO:0005515
GRMZM2G000937	GO:0016757
GRMZM2G000959	GO:0005975,GO:0004553
GRMZM2G000964	GO:0046872,GO:0003723
GRMZM2G000980	GO:0003723,GO:0003676,GO:0045131,GO:0000398
GRMZM2G001033	GO:0016021,GO:0008643,GO:0005351,GO:0000139
GRMZM2G001048	GO:0003677
GRMZM2G001079	GO:0016020,GO:0015018
GRMZM2G001084	GO:0019538,GO:0005515,GO:0016887,GO:0005524
GRMZM2G001114	GO:0008270
GRMZM2G001116	GO:0005515,GO:0007018,GO:0005871,GO:0003777
GRMZM2G001139	GO:0006355,GO:0005634,GO:0003700,GO:0046983,GO:0003677
GRMZM2G001160	GO:0005524,GO:0003676
GRMZM2G001164	GO:0005634
GRMZM2G001191	GO:0016779
GRMZM2G001195	GO:0005543
GRMZM2G001221	GO:0005509
GRMZM2G001241	GO:0016788
GRMZM2G001243	GO:0003824,GO:0006470,GO:0004722
GRMZM2G001265	GO:0008270
GRMZM2G001272	GO:0005515
GRMZM2G001283	GO:0007017,GO:0005874
GRMZM2G001288	GO:0005975,GO:0004553
GRMZM2G001289	GO:0003677,GO:0008289
GRMZM2G001297	GO:0055114,GO:0050660,GO:0016627,GO:0008152,GO:0003995
GRMZM2G001304	GO:0005992,GO:0003824
GRMZM2G001327	GO:0005525
GRMZM2G001334	GO:0044599
GRMZM2G001361	GO:0030244,GO:0016760,GO:0016020
GRMZM2G001401	GO:0050662,GO:0003824
GRMZM2G001405	GO:0003824
GRMZM2G001415	GO:0008033,GO:0004540
GRMZM2G001426	GO:0005634,GO:0000989
GRMZM2G001447	GO:0005515
GRMZM2G001457	GO:0006468,GO:0005524,GO:0004672
GRMZM2G001500	GO:0000902
GRMZM2G001508	GO:0003993
GRMZM2G001524	GO:0006241,GO:0006228,GO:0006183,GO:0006165,GO:0004550
GRMZM2G001551	GO:0005525
GRMZM2G001570	GO:0016021
GRMZM2G001585	GO:0016021,GO:0006508,GO:0004252
GRMZM2G001631	GO:0006396,GO:0004525,GO:0003723
GRMZM2G001639	GO:0005515
GRMZM2G001645	GO:0055114,GO:0050662,GO:0015936,GO:0004420
GRMZM2G001660	GO:0007186,GO:0005834,GO:0004871
GRMZM2G001663	GO:0006355
GRMZM2G001668	GO:0006468,GO:0004672
GRMZM2G001676	GO:0016020,GO:0006810,GO:0005215
GRMZM2G001696	GO:0006094,GO:0005524,GO:0004612
GRMZM2G001699	GO:0006355,GO:0005667,GO:0003700
GRMZM2G001713	GO:0006629,GO:0006508,GO:0004190
GRMZM2G001724	GO:0016021
GRMZM2G001730	GO:0006351,GO:0005634,GO:0003700,GO:0043565,GO:0006355
GRMZM2G001764	GO:0016020,GO:0006810,GO:0005215
GRMZM2G001784	GO:0005634,GO:0005524,GO:0004386,GO:0003723
GRMZM2G001799	GO:0006355,GO:0005634
GRMZM2G001803	GO:0055085,GO:0046873,GO:0030001,GO:0016020
GRMZM2G001812	GO:0006468,GO:0005524,GO:0004672,GO:0005515
GRMZM2G001814	GO:0008654,GO:0004609
GRMZM2G001845	GO:0006468,GO:0005524,GO:0004672
GRMZM2G001850	GO:0003676
GRMZM2G001869	GO:0006310,GO:0006302,GO:0005634,GO:0003677
GRMZM2G001898	GO:0055114,GO:0016491,GO:0008152
GRMZM2G001905	GO:0016787
GRMZM2G001918	GO:0019867
GRMZM2G001924	GO:0032040,GO:0006364,GO:0006468,GO:0004672
GRMZM2G001930	GO:0046983
GRMZM2G001934	GO:0005515,GO:0006468,GO:0004672
GRMZM2G001946	GO:0030247
GRMZM2G001953	GO:0007264,GO:0005525
GRMZM2G001956	GO:0006457
GRMZM2G001991	GO:0055114,GO:0016616,GO:0006694,GO:0003854
GRMZM2G001994	GO:0005975,GO:0004650,GO:0006355,GO:0005634,GO:0003700,GO:0055114,GO:0016491,GO:0008270
GRMZM2G002002	GO:0016779
GRMZM2G002023	GO:0016757
GRMZM2G002034	GO:0005975,GO:0004650
GRMZM2G002055	GO:0006511
GRMZM2G002075	GO:0043565,GO:0006355,GO:0003700
GRMZM2G002077	GO:0030244,GO:0016866
GRMZM2G002100	GO:0006468,GO:0005524,GO:0004672
GRMZM2G002114	GO:0008270,GO:0006355,GO:0006352
GRMZM2G002119	GO:0006355,GO:0003700
GRMZM2G002121	GO:0055114,GO:0016491,GO:0008270
GRMZM2G002124	GO:0006468,GO:0005524,GO:0004672
GRMZM2G002131	GO:0043565,GO:0006355,GO:0005634,GO:0003700
GRMZM2G002135	GO:0016746,GO:0008152,GO:0006644
GRMZM2G002142	GO:0055114,GO:0020037,GO:0016705,GO:0005506
GRMZM2G002161	GO:0003824
GRMZM2G002178	GO:0055114,GO:0020037,GO:0016705,GO:0005506
GRMZM2G002199	GO:0047262
GRMZM2G002220	GO:0051082,GO:0006950,GO:0006457,GO:0005524
GRMZM2G002225	GO:0003677,GO:0006355,GO:0005634
GRMZM2G002260	GO:0016798,GO:0005975,GO:0004553
GRMZM2G002276	GO:0006352,GO:0005669
GRMZM2G002280	GO:0046872
GRMZM2G002297	GO:0055085,GO:0046873,GO:0030001,GO:0016020
GRMZM2G002391	GO:0016021,GO:0006810,GO:0005337
GRMZM2G002416	GO:0008152,GO:0003824,GO:0046912
GRMZM2G002427	GO:0005515
GRMZM2G002440	GO:0051087,GO:0042803,GO:0006457,GO:0000774
GRMZM2G002472	GO:0006508,GO:0004190
GRMZM2G002473	GO:0030247,GO:0006468,GO:0004672
GRMZM2G002498	GO:0006412,GO:0005840,GO:0005622,GO:0003735
GRMZM2G002499	GO:0046488,GO:0016307
GRMZM2G002512	GO:0005515
GRMZM2G002515	GO:0006468,GO:0005524,GO:0004672,GO:0005515
GRMZM2G002531	GO:0006468,GO:0004672
GRMZM2G002542	GO:0005515,GO:0006468,GO:0004672
GRMZM2G002555	GO:0006468,GO:0005524,GO:0004672
GRMZM2G002569	GO:0005515,GO:0006468,GO:0005524,GO:0004672
GRMZM2G002595	GO:0045454
GRMZM2G002614	GO:0008152,GO:0003824
GRMZM2G002616	GO:0006413,GO:0005737,GO:0003743,GO:0003723
GRMZM2G002642	GO:0008168
GRMZM2G002652	GO:0016829,GO:0006520
GRMZM2G002656	GO:0055114,GO:0004616,GO:0043531
GRMZM2G002669	GO:0031145,GO:0030071,GO:0005680
GRMZM2G002687	GO:0006418,GO:0005524,GO:0004812,GO:0000166,GO:0006436,GO:0005737,GO:0004830
GRMZM2G002704	GO:0055114,GO:0016491
GRMZM2G002748	GO:0006468,GO:0005524,GO:0004672
GRMZM2G002754	GO:0051536,GO:0009055
GRMZM2G002756	GO:0030163
GRMZM2G002765	GO:0008641
GRMZM2G002807	GO:0008152,GO:0004807
GRMZM2G002825	GO:0005622,GO:0003779,GO:0030042,GO:0015629
GRMZM2G002828	GO:0017025,GO:0008270,GO:0006355,GO:0006352
GRMZM2G002851	GO:0006423,GO:0005737,GO:0005524,GO:0004817,GO:0000166
GRMZM2G002859	GO:0005515
GRMZM2G002871	GO:0008234,GO:0006508
GRMZM2G002874	GO:0003676
GRMZM2G002898	GO:0055114,GO:0020037,GO:0016705,GO:0005506
GRMZM2G002903	GO:0003676,GO:0006810,GO:0005622
GRMZM2G002910	GO:0070188,GO:0003697
GRMZM2G002915	GO:0003677,GO:0043565,GO:0006355,GO:0003700
GRMZM2G002950	GO:0005515,GO:0006468,GO:0004672
GRMZM2G002959	GO:0055114,GO:0003995,GO:0016627,GO:0050660,GO:0008152
GRMZM2G002961	GO:0008289
GRMZM2G002993	GO:0006629
GRMZM2G002999	GO:0008270
GRMZM2G003002	GO:0006334,GO:0005634,GO:0003677,GO:0000786
GRMZM2G003022	GO:0030127,GO:0008270,GO:0006888,GO:0006886
GRMZM2G003028	GO:0045454,GO:0015035,GO:0006662
GRMZM2G003038	GO:0008168,GO:0006479
GRMZM2G003043	GO:0051726,GO:0005634,GO:0006357
GRMZM2G003064	GO:0016021
GRMZM2G003068	GO:0008270,GO:0003676
GRMZM2G003096	GO:0003824
GRMZM2G003109	GO:0016833,GO:0009058
GRMZM2G003138	GO:0016747,GO:0008610,GO:0016020,GO:0006633
GRMZM2G003157	GO:0005525
GRMZM2G003167	GO:0016787,GO:0008152
GRMZM2G003172	GO:0043461
GRMZM2G003179	GO:0035434,GO:0016021,GO:0005375
GRMZM2G003182	GO:0016987,GO:0006355,GO:0006352,GO:0003700,GO:0003677
GRMZM2G003186	GO:0008152,GO:0003824
GRMZM2G003190	GO:0006633,GO:0004315
GRMZM2G003225	GO:0030915,GO:0006281,GO:0005634
GRMZM2G003230	GO:0055114,GO:0008137
GRMZM2G003304	GO:0043565,GO:0006355,GO:0003700,GO:0003677
GRMZM2G003306	GO:0003677
GRMZM2G003307	GO:0046540,GO:0000398,GO:0000244
GRMZM2G003331	GO:0016787
GRMZM2G003354	GO:0016853,GO:0005975
GRMZM2G003368	GO:0055114,GO:0045300,GO:0006631
GRMZM2G003379	GO:0005975,GO:0004553
GRMZM2G003384	GO:0006412,GO:0005840,GO:0005622,GO:0003735
GRMZM2G003385	GO:0030145,GO:0006007,GO:0005737,GO:0004619,GO:0046872,GO:0003824
GRMZM2G003411	GO:0016887,GO:0005524,GO:0016020
GRMZM2G003424	GO:0046872,GO:0003676
GRMZM2G003466	GO:0006355,GO:0003700
GRMZM2G003489	GO:0043565,GO:0006355,GO:0005634,GO:0003700
GRMZM2G003501	GO:0016747,GO:0008610,GO:0016020,GO:0006633
GRMZM2G003506	GO:0016021
GRMZM2G003509	GO:0003677,GO:0008289
GRMZM2G003514	GO:0046983,GO:0003677,GO:0006355,GO:0005634,GO:0003700
GRMZM2G003518	GO:0006887,GO:0000145
GRMZM2G003526	GO:0055114,GO:0016491,GO:0006633,GO:0005506
GRMZM2G003551	GO:0043565,GO:0006355,GO:0003700
GRMZM2G003563	GO:0016491,GO:0008152
GRMZM2G003589	GO:0016758,GO:0008152
GRMZM2G003607	GO:0008601,GO:0007165,GO:0000159
GRMZM2G003625	GO:0043531
GRMZM2G003638	GO:0043486,GO:0006355,GO:0006338,GO:0005634
GRMZM2G003640	GO:0008138,GO:0006470
GRMZM2G003642	GO:0006850,GO:0005743
GRMZM2G003656	GO:0008270,GO:0005515
GRMZM2G003662	GO:0006468,GO:0005524,GO:0004672
GRMZM2G003663	GO:0005515
GRMZM2G003682	GO:0006952
GRMZM2G003692	GO:0016491,GO:0008152
GRMZM2G003715	GO:0006355,GO:0003677
GRMZM2G003724	GO:0008176,GO:0006400,GO:0006096,GO:0004618
GRMZM2G003725	GO:0008270,GO:0005515
GRMZM2G003732	GO:0005634
GRMZM2G003734	GO:0016192,GO:0006904
GRMZM2G003750	GO:0016020
GRMZM2G003755	GO:0006355,GO:0043531
GRMZM2G003769	GO:0016559,GO:0005779
GRMZM2G003784	GO:0006508,GO:0004190
GRMZM2G003789	GO:0016787,GO:0008152
GRMZM2G003794	GO:0016798,GO:0005975,GO:0004553
GRMZM2G003796	GO:0055114,GO:0020037,GO:0016705,GO:0005506
GRMZM2G003814	GO:0055114,GO:0016491,GO:0008270
GRMZM2G003838	GO:0004857
GRMZM2G003853	GO:0047750,GO:0016125,GO:0016021
GRMZM2G003861	GO:0008168
GRMZM2G003875	GO:0009113,GO:0004637
GRMZM2G003883	GO:0030955,GO:0006096,GO:0004743,GO:0000287
GRMZM2G003897	GO:0003676
GRMZM2G003930	GO:0008270
GRMZM2G003953	GO:0008234,GO:0006508
GRMZM2G003984	GO:0005524,GO:0006508,GO:0004176,GO:0004252,GO:0030163
GRMZM2G003988	GO:0016020
GRMZM2G004012	GO:0009055
GRMZM2G004019	GO:0019370,GO:0008270,GO:0008237
GRMZM2G004023	GO:0007005,GO:0004842
GRMZM2G004036	GO:0050662,GO:0003824
GRMZM2G004040	GO:0016887,GO:0005524,GO:0006508,GO:0004222
GRMZM2G004057	GO:0006412,GO:0005840,GO:0005622,GO:0003735
GRMZM2G004060	GO:0043565,GO:0006355,GO:0003700
GRMZM2G004079	GO:0006468,GO:0004672
GRMZM2G004106	GO:0009055
GRMZM2G004128	GO:0071949
GRMZM2G004131	GO:0008299
GRMZM2G004138	GO:0008171
GRMZM2G004160	GO:0009055
GRMZM2G004161	GO:0005515,GO:0008270,GO:0006355,GO:0005634,GO:0004402,GO:0003712
GRMZM2G004188	GO:0006281,GO:0004518
GRMZM2G004207	GO:0006468,GO:0004672
GRMZM2G004211	GO:0055114,GO:0020037,GO:0006979,GO:0004601
GRMZM2G004222	GO:0055114,GO:0006788,GO:0004392
GRMZM2G004224	GO:0045156,GO:0019684,GO:0009772
GRMZM2G004276	GO:0051082,GO:0031072,GO:0006629,GO:0004806
GRMZM2G004278	GO:0030247
GRMZM2G004314	GO:0033179,GO:0015991,GO:0015078
GRMZM2G004320	GO:0016021,GO:0006481,GO:0004671
GRMZM2G004330	GO:0006468,GO:0004672
GRMZM2G004334	GO:0003677,GO:0008289
GRMZM2G004356	GO:0046983
GRMZM2G004377	GO:0003824
GRMZM2G004382	GO:0055114,GO:0009082,GO:0004455,GO:0016491
GRMZM2G004384	GO:0005524
GRMZM2G004385	GO:0046872
GRMZM2G004397	GO:0048193,GO:0016020
GRMZM2G004412	GO:0043531
GRMZM2G004414	GO:0055085,GO:0016021
GRMZM2G004422	GO:0008270,GO:0005515
GRMZM2G004435	GO:0005975,GO:0004650
GRMZM2G004440	GO:0055085
GRMZM2G004455	GO:0003676
GRMZM2G004459	GO:0007264,GO:0005525
GRMZM2G004468	GO:0006468,GO:0005524,GO:0004672
GRMZM2G004475	GO:0005515
GRMZM2G004480	GO:0008270,GO:0005515
GRMZM2G004483	GO:0005515
GRMZM2G004487	GO:0006468,GO:0004672
GRMZM2G004500	GO:0005975,GO:0004650
GRMZM2G004519	GO:0008270,GO:0005515
GRMZM2G004521	GO:0005515
GRMZM2G004523	GO:0005515
GRMZM2G004528	GO:0008654,GO:0006021,GO:0004512
GRMZM2G004531	GO:0006355,GO:0003677
GRMZM2G004534	GO:0030955,GO:0006096,GO:0004743,GO:0000287
GRMZM2G004544	GO:0016758,GO:0008152
GRMZM2G004559	GO:0017056,GO:0006913,GO:0005643
GRMZM2G004572	GO:0005515,GO:0006468,GO:0005524,GO:0004672
GRMZM2G004582	GO:0016787
GRMZM2G004592	GO:0005515
GRMZM2G004593	GO:0016868,GO:0006096,GO:0004619
GRMZM2G004619	GO:0006355,GO:0005634,GO:0005524,GO:0032502,GO:0006351
GRMZM2G004640	GO:0008234,GO:0006508
GRMZM2G004641	GO:0006355,GO:0003677
GRMZM2G004653	GO:0016020,GO:0006810,GO:0005215
GRMZM2G004683	GO:0050662,GO:0003824
GRMZM2G004694	GO:0055085,GO:0016021
GRMZM2G004696	GO:0006355,GO:0005634
GRMZM2G004699	GO:0048046,GO:0016762,GO:0006073,GO:0005618,GO:0005975,GO:0004553
GRMZM2G004714	GO:0008725,GO:0006284
GRMZM2G004741	GO:0005515
GRMZM2G004748	GO:0016887,GO:0005524,GO:0055085,GO:0042626,GO:0016021,GO:0006810
GRMZM2G004768	GO:0005777
GRMZM2G004799	GO:0008270,GO:0005515
GRMZM2G004824	GO:0016829,GO:0006520
GRMZM2G004835	GO:0016788
GRMZM2G004847	GO:0045454,GO:0015035,GO:0009055
GRMZM2G004856	GO:0005975,GO:0004553
GRMZM2G004858	GO:0016758,GO:0008152
GRMZM2G004878	GO:0003677,GO:0006334,GO:0005634,GO:0000786
GRMZM2G004880	GO:0016772,GO:0005524
GRMZM2G004908	GO:0005515
GRMZM2G004927	GO:0042545,GO:0030599,GO:0005618
GRMZM2G004932	GO:0006096,GO:0003872
GRMZM2G004946	GO:0032012,GO:0005086
GRMZM2G004947	GO:0016788
GRMZM2G004957	GO:0003677,GO:0008289
GRMZM2G004959	GO:0008270
GRMZM2G004982	GO:0005089
GRMZM2G004984	GO:0055114,GO:0020037,GO:0006979,GO:0004601
GRMZM2G004996	GO:0007034
GRMZM2G005000	GO:0008270
GRMZM2G005013	GO:0055085,GO:0016020
GRMZM2G005033	GO:0006468,GO:0005524,GO:0004672,GO:0004674
GRMZM2G005040	GO:0071805,GO:0016020,GO:0015079
GRMZM2G005043	GO:0016021,GO:0005215
GRMZM2G005046	GO:0016747
GRMZM2G005080	GO:0019773,GO:0006511,GO:0004175,GO:0051603,GO:0005839,GO:0004298
GRMZM2G005082	GO:0005975,GO:0004553
GRMZM2G005103	GO:0016757,GO:0047262
GRMZM2G005114	GO:0008234,GO:0006508
GRMZM2G005126	GO:0046872
GRMZM2G005134	GO:0043531
GRMZM2G005155	GO:0006355,GO:0005634,GO:0003700,GO:0046983,GO:0003677
GRMZM2G005163	GO:0055085
GRMZM2G005170	GO:0005789
GRMZM2G005174	GO:0046983
GRMZM2G005195	GO:0005515
GRMZM2G005205	GO:0008270
GRMZM2G005207	GO:0043565,GO:0006355,GO:0003700
GRMZM2G005233	GO:0016787
GRMZM2G005236	GO:0003676
GRMZM2G005256	GO:0008168
GRMZM2G005260	GO:0008168,GO:0008152
GRMZM2G005281	GO:0005525
GRMZM2G005284	GO:0003677,GO:0009725,GO:0006355,GO:0005634
GRMZM2G005290	GO:0006508,GO:0004190
GRMZM2G005298	GO:0005975,GO:0004553,GO:0043169,GO:0003824
GRMZM2G005301	GO:0006355,GO:0003700
GRMZM2G005304	GO:0008641,GO:0006914,GO:0005737
GRMZM2G005308	GO:0034457,GO:0006364,GO:0005732,GO:0005634
GRMZM2G005310	GO:0003682
GRMZM2G005339	GO:0006888,GO:0005622,GO:0005801
GRMZM2G005341	GO:0006260,GO:0005634,GO:0003677
GRMZM2G005346	GO:0052689,GO:0006482
GRMZM2G005347	GO:0043531
GRMZM2G005350	GO:0008138,GO:0006470
GRMZM2G005353	GO:0007275
GRMZM2G005365	GO:0043240,GO:0006281,GO:0004842
GRMZM2G005374	GO:0003676
GRMZM2G005433	GO:0016020,GO:0015979,GO:0009654,GO:0009523
GRMZM2G005452	GO:0043531
GRMZM2G005456	GO:0006355
GRMZM2G005459	GO:0003676
GRMZM2G005475	GO:0008234,GO:0006508
GRMZM2G005480	GO:0045454
GRMZM2G005486	GO:0005515
GRMZM2G005505	GO:0008270,GO:0006355
GRMZM2G005516	GO:0003924,GO:0007017,GO:0005874
GRMZM2G005522	GO:0016747
GRMZM2G005526	GO:0055085,GO:0016020,GO:0006810,GO:0005215
GRMZM2G005536	GO:0006260,GO:0005634
GRMZM2G005540	GO:0016021
GRMZM2G005545	GO:0008152
GRMZM2G005552	GO:0045735
GRMZM2G005592	GO:0005525,GO:0003924
GRMZM2G005619	GO:0005634
GRMZM2G005624	GO:0003677
GRMZM2G005633	GO:0008061,GO:0016998,GO:0006032,GO:0004568
GRMZM2G005640	GO:0006412,GO:0005840,GO:0005622,GO:0003735
GRMZM2G005641	GO:0016192,GO:0016021
GRMZM2G005659	GO:0006355,GO:0003700
GRMZM2G005680	GO:0008373,GO:0006486
GRMZM2G005700	GO:0008374,GO:0006629
GRMZM2G005710	GO:0005515
GRMZM2G005732	GO:0000160
GRMZM2G005737	GO:0006397,GO:0005737,GO:0005634,GO:0003723
GRMZM2G005764	GO:0070403
GRMZM2G005779	GO:0007034
GRMZM2G005788	GO:0006412,GO:0005840,GO:0003735
GRMZM2G005791	GO:0055085,GO:0016020,GO:0006811,GO:0005216
GRMZM2G005798	GO:0005975,GO:0004553
GRMZM2G005815	GO:0043565,GO:0006355,GO:0005634,GO:0003700
GRMZM2G005834	GO:0008270
GRMZM2G005840	GO:0008270,GO:0005515
GRMZM2G005844	GO:0008168,GO:0006139
GRMZM2G005849	GO:0030246,GO:0005975,GO:1901137,GO:0004360
GRMZM2G005859	GO:0016020
GRMZM2G005869	GO:0006468,GO:0005524,GO:0004674
GRMZM2G005886	GO:0008610
GRMZM2G005909	GO:0008299
GRMZM2G005984	GO:0010207
GRMZM2G005990	GO:0055114,GO:0009165,GO:0006545,GO:0004146,GO:0006231,GO:0004799
GRMZM2G005996	GO:0055085,GO:0016020
GRMZM2G006009	GO:0006351,GO:0003899,GO:0003677
GRMZM2G006042	GO:0006355,GO:0005634,GO:0003677,GO:0009725
GRMZM2G006062	GO:0045454,GO:0015035,GO:0006662
GRMZM2G006069	GO:0008270,GO:0006508,GO:0004181
GRMZM2G006071	GO:0003676
GRMZM2G006080	GO:0006468,GO:0004672
GRMZM2G006083	GO:0005515
GRMZM2G006107	GO:0006457,GO:0003755,GO:0000413
GRMZM2G006117	GO:0016021
GRMZM2G006119	GO:0016491,GO:0008152
GRMZM2G006130	GO:0046556,GO:0046373
GRMZM2G006178	GO:0016887,GO:0005524
GRMZM2G006207	GO:0019904
GRMZM2G006212	GO:0055085,GO:0016020,GO:0015297,GO:0015238,GO:0006855
GRMZM2G006219	GO:0005789
GRMZM2G006222	GO:0003676
GRMZM2G006246	GO:0005515
GRMZM2G006287	GO:0003723
GRMZM2G006293	GO:0006412,GO:0005840,GO:0003735
GRMZM2G006310	GO:0055085,GO:0042626,GO:0016021,GO:0006810,GO:0005524,GO:0016887
GRMZM2G006341	GO:0008017,GO:0007018,GO:0005524,GO:0003777,GO:0005871
GRMZM2G006366	GO:0006508,GO:0004252
GRMZM2G006370	GO:0006468,GO:0005524,GO:0004672
GRMZM2G006377	GO:0008234,GO:0006508
GRMZM2G006404	GO:0006468,GO:0004672
GRMZM2G006416	GO:0003824,GO:0006470,GO:0004722
GRMZM2G006424	GO:0006511
GRMZM2G006428	GO:0016567,GO:0004842
GRMZM2G006429	GO:0003824
GRMZM2G006450	GO:0006412,GO:0005840,GO:0005622,GO:0003735
GRMZM2G006452	GO:0005524,GO:0007076,GO:0000796
GRMZM2G006453	GO:0006383,GO:0005666,GO:0003899,GO:0003677
GRMZM2G006468	GO:0004518
GRMZM2G006470	GO:0016020
GRMZM2G006474	GO:0032012,GO:0005086
GRMZM2G006480	GO:0030170,GO:0009058
GRMZM2G006493	GO:0046872
GRMZM2G006497	GO:0043565,GO:0006355,GO:0003700
GRMZM2G006505	GO:0006468,GO:0005524,GO:0004672
GRMZM2G006554	GO:0006468,GO:0005524,GO:0004672
GRMZM2G006565	GO:0016758,GO:0008152
GRMZM2G006578	GO:0043565,GO:0006355,GO:0003700,GO:0006351
GRMZM2G006593	GO:0055114,GO:0048038,GO:0009308,GO:0008131,GO:0005507
GRMZM2G006620	GO:0051287
GRMZM2G006631	GO:0046983
GRMZM2G006672	GO:0055114,GO:0016616,GO:0051287,GO:0000287
GRMZM2G006678	GO:0008152,GO:0006741,GO:0003951
GRMZM2G006707	GO:0005515
GRMZM2G006714	GO:0006950,GO:0005516
GRMZM2G006727	GO:0055114,GO:0020037,GO:0006979,GO:0004601
GRMZM2G006736	GO:0016987,GO:0006355,GO:0006352,GO:0003700,GO:0003677
GRMZM2G006745	GO:0006355,GO:0003700
GRMZM2G006762	GO:0016787
GRMZM2G006780	GO:0043531
GRMZM2G006781	GO:0017119
GRMZM2G006790	GO:0005509
GRMZM2G006791	GO:0055114,GO:0020037,GO:0006979,GO:0004601
GRMZM2G006806	GO:0006397,GO:0005634,GO:0004721
GRMZM2G006821	GO:0006468,GO:0004672
GRMZM2G006838	GO:0043531
GRMZM2G006894	GO:0046872,GO:0000166
GRMZM2G006937	GO:0003824
GRMZM2G006943	GO:0008270,GO:0008237,GO:0006508
GRMZM2G006953	GO:0006810,GO:0005622
GRMZM2G006964	GO:0055114,GO:0016491
GRMZM2G006973	GO:0005515
GRMZM2G006977	GO:0005516,GO:0046872,GO:0000166
GRMZM2G007012	GO:0016758,GO:0008152
GRMZM2G007020	GO:0016772,GO:0016310,GO:0050242,GO:0006090
GRMZM2G007021	GO:0005515
GRMZM2G007038	GO:0007264,GO:0005525
GRMZM2G007063	GO:0043565,GO:0006355,GO:0003700
GRMZM2G007103	GO:0006412,GO:0005840,GO:0003735
GRMZM2G007137	GO:0016021,GO:0016020,GO:0022857
GRMZM2G007140	GO:0055114,GO:0016491
GRMZM2G007151	GO:0051716,GO:0046658
GRMZM2G007156	GO:0036459,GO:0016579
GRMZM2G007157	GO:0008374,GO:0006629
GRMZM2G007185	GO:0016020,GO:0008378,GO:0006486
GRMZM2G007188	GO:0007264,GO:0005525
GRMZM2G007195	GO:0055114,GO:0016616,GO:0006694,GO:0003854
GRMZM2G007228	GO:0006508,GO:0004190
GRMZM2G007229	GO:0005515
GRMZM2G007246	GO:0006468,GO:0004672
GRMZM2G007249	GO:0055114,GO:0016491
GRMZM2G007252	GO:0050662,GO:0003824
GRMZM2G007277	GO:0033926
GRMZM2G007283	GO:0006468,GO:0004672
GRMZM2G007289	GO:0055114,GO:0016491,GO:0006633,GO:0005506
GRMZM2G007327	GO:0005515
GRMZM2G007347	GO:0005975,GO:0004553
GRMZM2G007369	GO:0008017,GO:0007018,GO:0005524,GO:0003777,GO:0016757
GRMZM2G007381	GO:0005515
GRMZM2G007385	GO:0045454
GRMZM2G007399	GO:0006468,GO:0005524,GO:0004672
GRMZM2G007404	GO:0055114,GO:0016616,GO:0006694,GO:0003854
GRMZM2G007406	GO:0006355,GO:0003700
GRMZM2G007441	GO:0080085,GO:0045038,GO:0009507,GO:0009416
GRMZM2G007453	GO:0003723
GRMZM2G007466	GO:0006468,GO:0004672
GRMZM2G007469	GO:0055114,GO:0016702
GRMZM2G007477	GO:0006468,GO:0005524,GO:0004672
GRMZM2G007481	GO:0055085,GO:0016021
GRMZM2G007486	GO:0006457,GO:0003755,GO:0000413
GRMZM2G007488	GO:0006457
GRMZM2G007489	GO:0016790,GO:0006633
GRMZM2G007514	GO:0030036,GO:0005856
GRMZM2G007587	GO:0005515
GRMZM2G007590	GO:0003676,GO:0017069,GO:0000398
GRMZM2G007647	GO:0016597,GO:0008152
GRMZM2G007651	GO:0055114,GO:0010181,GO:0004733
GRMZM2G007681	GO:0006351,GO:0003899,GO:0003677
GRMZM2G007683	GO:0055114,GO:0032542
GRMZM2G007695	GO:0006412,GO:0005840,GO:0003735
GRMZM2G007698	GO:0055114,GO:0020037,GO:0016705,GO:0005506
GRMZM2G007713	GO:0046872,GO:0030001
GRMZM2G007721	GO:0030259,GO:0016758,GO:0005975,GO:0008152
GRMZM2G007736	GO:0005992,GO:0003824
GRMZM2G007754	GO:0008299,GO:0016787
GRMZM2G007791	GO:0005515,GO:0003676
GRMZM2G007795	GO:0016758,GO:0008152
GRMZM2G007801	GO:0006468,GO:0004672
GRMZM2G007810	GO:0016020,GO:0015171,GO:0003333
GRMZM2G007817	GO:0006355,GO:0003677
GRMZM2G007848	GO:0016773,GO:0016020,GO:0005524
GRMZM2G007854	GO:0006468,GO:0004672
GRMZM2G007871	GO:0031204,GO:0008565
GRMZM2G007907	GO:0006508,GO:0004222
GRMZM2G007909	GO:0016021,GO:0008643,GO:0005351,GO:0000139
GRMZM2G007914	GO:0022857,GO:0016021
GRMZM2G007915	GO:0045116,GO:0016881,GO:0005524,GO:0008641,GO:0019781
GRMZM2G007922	GO:0016787,GO:0005524,GO:0003677,GO:0016817
GRMZM2G007928	GO:0005576,GO:0004867
GRMZM2G007936	GO:0009396,GO:0005524,GO:0004326
GRMZM2G007939	GO:0016161,GO:0000272
GRMZM2G007953	GO:0016021,GO:0016020,GO:0022857
GRMZM2G007957	GO:0016765
GRMZM2G007981	GO:0005515
GRMZM2G008029	GO:0043565,GO:0006355,GO:0003700
GRMZM2G008047	GO:0004857
GRMZM2G008093	GO:0005815,GO:0000922,GO:0000226
GRMZM2G008095	GO:0016192,GO:0016021,GO:0006810
GRMZM2G008106	GO:0009055
GRMZM2G008109	GO:0006508,GO:0004252
GRMZM2G008122	GO:0046872,GO:0000166
GRMZM2G008123	GO:0007275,GO:0006511,GO:0005634
GRMZM2G008159	GO:0042546,GO:0016020,GO:0008107
GRMZM2G008202	GO:0046872,GO:0030001
GRMZM2G008203	GO:0016020,GO:0015992,GO:0009678,GO:0004427
GRMZM2G008216	GO:0008270
GRMZM2G008226	GO:0005992,GO:0003824
GRMZM2G008232	GO:0034220,GO:0046961,GO:0033180,GO:0015991
GRMZM2G008234	GO:0006355,GO:0003700,GO:0007275
GRMZM2G008247	GO:0005975,GO:0004553
GRMZM2G008250	GO:0006355,GO:0003700
GRMZM2G008259	GO:0005515,GO:0042393,GO:0006355
GRMZM2G008273	GO:0005515
GRMZM2G008279	GO:0051082,GO:0006950,GO:0006457,GO:0005524
GRMZM2G008286	GO:0003677
GRMZM2G008287	GO:0008168,GO:0006479
GRMZM2G008290	GO:0046872,GO:0030001
GRMZM2G008297	GO:0008270
GRMZM2G008316	GO:0016757
GRMZM2G008327	GO:0006468,GO:0005524,GO:0004672
GRMZM2G008341	GO:0045735
GRMZM2G008356	GO:0008270,GO:0003677
GRMZM2G008359	GO:0006468,GO:0005524,GO:0004672
GRMZM2G008369	GO:0005525
GRMZM2G008374	GO:0006355,GO:0003677
GRMZM2G008377	GO:0051082,GO:0006950,GO:0006457,GO:0005524
GRMZM2G008410	GO:0003723
GRMZM2G008430	GO:0006412,GO:0005840,GO:0003735
GRMZM2G008456	GO:0003677,GO:0006334,GO:0005634,GO:0000786
GRMZM2G008468	GO:0016192
GRMZM2G008482	GO:0005515
GRMZM2G008501	GO:0016757,GO:0047262
GRMZM2G008513	GO:0006468,GO:0004672,GO:0005524
GRMZM2G008525	GO:0046983
GRMZM2G008539	GO:0016758,GO:0008152
GRMZM2G008550	GO:0006412,GO:0005840,GO:0003735
GRMZM2G008556	GO:0008017,GO:0007010
GRMZM2G008583	GO:0005515
GRMZM2G008593	GO:0004857,GO:0042545,GO:0030599,GO:0005618
GRMZM2G008611	GO:0003676
GRMZM2G008623	GO:0019773,GO:0006511,GO:0004175,GO:0051603,GO:0005839,GO:0004298
GRMZM2G008627	GO:0005975,GO:0004553
GRMZM2G008636	GO:0030117,GO:0016192,GO:0006886
GRMZM2G008638	GO:0005515,GO:0048193,GO:0016020
GRMZM2G008642	GO:0016021,GO:0016020
GRMZM2G008647	GO:0006412,GO:0005840,GO:0005622,GO:0003735
GRMZM2G008691	GO:0046983
GRMZM2G008714	GO:0030955,GO:0006096,GO:0004743,GO:0000287
GRMZM2G008728	GO:0055114,GO:0016491,GO:0008270
GRMZM2G008730	GO:0006412,GO:0005840,GO:0005622,GO:0003735
GRMZM2G008748	GO:0006412,GO:0005840,GO:0005622,GO:0003735
GRMZM2G008754	GO:0005634
GRMZM2G008764	GO:0005515
GRMZM2G008765	GO:0006396
GRMZM2G008792	GO:0055114,GO:0050660,GO:0016491,GO:0019139,GO:0009690
GRMZM2G008819	GO:0009055
GRMZM2G008834	GO:0005515
GRMZM2G008854	GO:0006468,GO:0005524,GO:0004672,GO:0006470,GO:0004722
GRMZM2G008864	GO:0009055
GRMZM2G008865	GO:0003677
GRMZM2G008892	GO:0019898,GO:0015979,GO:0009654,GO:0009523,GO:0005509
GRMZM2G008898	GO:0046983
GRMZM2G008913	GO:0045735
GRMZM2G008919	GO:0016192,GO:0016021
GRMZM2G008923	GO:0006412,GO:0005840,GO:0005622,GO:0003735
GRMZM2G008935	GO:0016758,GO:0008152
GRMZM2G009016	GO:0016021,GO:0015689,GO:0015098
GRMZM2G009021	GO:0005515
GRMZM2G009025	GO:0005975,GO:0004553
GRMZM2G009030	GO:0006096,GO:0004634,GO:0000287,GO:0000015
GRMZM2G009048	GO:0042651,GO:0015979,GO:0009522,GO:0005516
GRMZM2G009070	GO:0016874,GO:0009058,GO:0005524
GRMZM2G009091	GO:0008616,GO:0008479,GO:0006400
GRMZM2G009103	GO:0016021,GO:0016020,GO:0022857
GRMZM2G009106	GO:0006511
GRMZM2G009114	GO:0055114,GO:0048038,GO:0009308,GO:0008131,GO:0005507,GO:0016747,GO:0008152
GRMZM2G009125	GO:0016758,GO:0008152
GRMZM2G009136	GO:0005544,GO:0005509
GRMZM2G009154	GO:0031225,GO:0016049,GO:0010215
GRMZM2G009157	GO:0008234,GO:0006508,GO:0045454
GRMZM2G009163	GO:0003824,GO:0006470,GO:0004722
GRMZM2G009166	GO:0006468,GO:0005524,GO:0004672
GRMZM2G009196	GO:0009231,GO:0004746
GRMZM2G009214	GO:0006412,GO:0005840,GO:0005622,GO:0003735
GRMZM2G009221	GO:0006096,GO:0004332
GRMZM2G009232	GO:0055114,GO:0020037,GO:0016705,GO:0005506
GRMZM2G009265	GO:0007275,GO:0006511,GO:0005634
GRMZM2G009282	GO:0005975,GO:0004553
GRMZM2G009323	GO:0016597,GO:0008152,GO:0055114,GO:0051287,GO:0016616
GRMZM2G009344	GO:0016021,GO:0016020,GO:0005215
GRMZM2G009346	GO:0031204,GO:0008565
GRMZM2G009348	GO:0016747,GO:0008610
GRMZM2G009353	GO:0071805,GO:0016020,GO:0015079
GRMZM2G009368	GO:0016020,GO:0006810,GO:0005215
GRMZM2G009400	GO:0030170,GO:0019752,GO:0016831
GRMZM2G009406	GO:0006355,GO:0003677
GRMZM2G009412	GO:0006412,GO:0005840,GO:0005622,GO:0003735
GRMZM2G009413	GO:0003723,GO:0000178
GRMZM2G009435	GO:0055114,GO:0016616,GO:0006694,GO:0003854
GRMZM2G009438	GO:0008152,GO:0003824
GRMZM2G009443	GO:0005515,GO:0016887,GO:0005524,GO:0019538
GRMZM2G009448	GO:0003676
GRMZM2G009462	GO:0006397
GRMZM2G009464	GO:0016887,GO:0005524
GRMZM2G009478	GO:0046983
GRMZM2G009479	GO:0005515,GO:0055114,GO:0046872,GO:0016702
GRMZM2G009499	GO:0006468,GO:0004672
GRMZM2G009506	GO:0006468,GO:0004672
GRMZM2G009510	GO:0016747,GO:0008610,GO:0016020,GO:0006633
GRMZM2G009514	GO:0016887,GO:0005524
GRMZM2G009530	GO:0043565,GO:0008270,GO:0006355,GO:0003700
GRMZM2G009544	GO:0006334,GO:0005634,GO:0003677,GO:0000786
GRMZM2G009546	GO:0008234,GO:0006508,GO:0006415,GO:0003747
GRMZM2G009575	GO:0003676
GRMZM2G009588	GO:0005515
GRMZM2G009591	GO:0006096,GO:0003872
GRMZM2G009593	GO:0005515,GO:0016787
GRMZM2G009598	GO:0006355,GO:0003700
GRMZM2G009624	GO:0003676
GRMZM2G009626	GO:0016758,GO:0008152,GO:0030259,GO:0005975
GRMZM2G009627	GO:0005515
GRMZM2G009638	GO:0046961,GO:0046933,GO:0045261,GO:0015986
GRMZM2G009655	GO:0004843
GRMZM2G009661	GO:0008601,GO:0007165,GO:0000159
GRMZM2G009681	GO:0050662,GO:0003824
GRMZM2G009703	GO:0006468,GO:0005524,GO:0004672
GRMZM2G009715	GO:0006813,GO:0055085,GO:0016021,GO:0015299,GO:0006812
GRMZM2G009717	GO:0005515
GRMZM2G009719	GO:0006950
GRMZM2G009724	GO:0005515
GRMZM2G009768	GO:0034314,GO:0030833,GO:0005885,GO:0005856
GRMZM2G009770	GO:0005515,GO:0006468,GO:0004672
GRMZM2G009779	GO:0055085,GO:0016021
GRMZM2G009783	GO:0032324
GRMZM2G009785	GO:0009976
GRMZM2G009792	GO:0006950
GRMZM2G009800	GO:0055085,GO:0016021
GRMZM2G009804	GO:0045454,GO:0015035,GO:0009055
GRMZM2G009808	GO:0008152
GRMZM2G009818	GO:0005515,GO:0006468,GO:0005524,GO:0004672
GRMZM2G009843	GO:0006468,GO:0005524,GO:0004672
GRMZM2G009845	GO:0008565,GO:0006606,GO:0005737,GO:0005634,GO:0005515
GRMZM2G009869	GO:0006468,GO:0005524,GO:0004672
GRMZM2G009871	GO:0005524,GO:0051082,GO:0006457
GRMZM2G009892	GO:0006355,GO:0003677
GRMZM2G009894	GO:0006412,GO:0005840,GO:0005622,GO:0003735
GRMZM2G009895	GO:0016021,GO:0006810
GRMZM2G009913	GO:0007094
GRMZM2G009928	GO:0055114,GO:0016491,GO:0016209,GO:0045454,GO:0015035,GO:0006662
GRMZM2G009936	GO:0006412,GO:0005840,GO:0005622,GO:0003735
GRMZM2G009940	GO:0016491,GO:0008152
GRMZM2G009968	GO:0045454,GO:0015035,GO:0009055
GRMZM2G009987	GO:0005524
GRMZM2G009995	GO:0005515,GO:0006468,GO:0004672
GRMZM2G010011	GO:0008270
GRMZM2G010017	GO:0003824,GO:0006470,GO:0004722
GRMZM2G010044	GO:0008152
GRMZM2G010054	GO:0005515,GO:0030117,GO:0016192,GO:0006886,GO:0005198,GO:0030126
GRMZM2G010056	GO:0003723,GO:0032259,GO:0008168
GRMZM2G010075	GO:0005515
GRMZM2G010085	GO:0016787,GO:0005524,GO:0003677,GO:0043044,GO:0031491,GO:0016818,GO:0006338,GO:0005634,GO:0003676
GRMZM2G010091	GO:0005509,GO:0030247,GO:0006468,GO:0005524,GO:0004672
GRMZM2G010093	GO:0005509
GRMZM2G010100	GO:0006355,GO:0003700
GRMZM2G010136	GO:0051016,GO:0008290
GRMZM2G010146	GO:0006888,GO:0005622,GO:0005801
GRMZM2G010152	GO:0046872,GO:0030001,GO:0000166
GRMZM2G010202	GO:0030170,GO:0009058
GRMZM2G010211	GO:0030170,GO:0008483,GO:0009073,GO:0003849
GRMZM2G010221	GO:0055114,GO:0020037,GO:0016705,GO:0005506
GRMZM2G010238	GO:0006777
GRMZM2G010251	GO:0055085,GO:0016021
GRMZM2G010280	GO:0055085,GO:0016021
GRMZM2G010286	GO:0016787
GRMZM2G010290	GO:0006355,GO:0003677
GRMZM2G010298	GO:0003824,GO:0006470,GO:0004722
GRMZM2G010302	GO:0003676
GRMZM2G010306	GO:0005525
GRMZM2G010307	GO:0030170,GO:0008483
GRMZM2G010315	GO:0031011,GO:0006355,GO:0006281
GRMZM2G010319	GO:0045454,GO:0015035,GO:0009055
GRMZM2G010328	GO:0030170,GO:0009058
GRMZM2G010338	GO:0005515
GRMZM2G010342	GO:0016818,GO:0006338,GO:0005634,GO:0005524,GO:0003676,GO:0016787,GO:0003677
GRMZM2G010348	GO:0020037,GO:0009055
GRMZM2G010349	GO:0006468,GO:0005524,GO:0004672
GRMZM2G010356	GO:0016829,GO:0010333,GO:0008152,GO:0000287
GRMZM2G010357	GO:0006355,GO:0005634
GRMZM2G010372	GO:0016021,GO:0016020,GO:0022857
GRMZM2G010406	GO:0006526,GO:0005524,GO:0004055
GRMZM2G010428	GO:0055114,GO:0045300,GO:0006631
GRMZM2G010433	GO:0003333
GRMZM2G010435	GO:0008234,GO:0006508
GRMZM2G010452	GO:0008536,GO:0006886
GRMZM2G010453	GO:0006468,GO:0004672
GRMZM2G010468	GO:0055114,GO:0020037,GO:0016705,GO:0005506
GRMZM2G010471	GO:0006950,GO:0005516
GRMZM2G010488	GO:0016567,GO:0004842,GO:0006468,GO:0005524,GO:0004672
GRMZM2G010491	GO:0045454,GO:0015035,GO:0006662
GRMZM2G010494	GO:0008152,GO:0003824
GRMZM2G010505	GO:0008234,GO:0006508
GRMZM2G010522	GO:0006468,GO:0004672
GRMZM2G010551	GO:0005515
GRMZM2G010555	GO:0055114,GO:0009916
GRMZM2G010596	GO:0015940,GO:0003864
GRMZM2G010599	GO:0006412,GO:0005840,GO:0005622,GO:0003735
GRMZM2G010640	GO:0055114,GO:0020037,GO:0006979,GO:0004601
GRMZM2G010649	GO:0033588
GRMZM2G010657	GO:0007264,GO:0005085
GRMZM2G010669	GO:0006355,GO:0005634,GO:0003700,GO:0046983,GO:0003677
GRMZM2G010693	GO:0005515,GO:0006468,GO:0004672
GRMZM2G010731	GO:0008168
GRMZM2G010743	GO:0005515
GRMZM2G010762	GO:0009055
GRMZM2G010765	GO:0055085,GO:0016020,GO:0015297,GO:0015238,GO:0006855
GRMZM2G010768	GO:0008654,GO:0006021,GO:0004512
GRMZM2G010775	GO:0006470,GO:0004725
GRMZM2G010779	GO:0055085,GO:0016021
GRMZM2G010791	GO:0015977,GO:0008964,GO:0006099
GRMZM2G010801	GO:0031167,GO:0008168
GRMZM2G010823	GO:0016829,GO:0006099
GRMZM2G010836	GO:0016020,GO:0006886
GRMZM2G010871	GO:0043565,GO:0006355,GO:0005634,GO:0003700
GRMZM2G010884	GO:0016020,GO:0009765
GRMZM2G010892	GO:0006468,GO:0004672
GRMZM2G010929	GO:0003677
GRMZM2G010933	GO:0016531,GO:0006825,GO:0005758,GO:0005507
GRMZM2G010937	GO:0005515
GRMZM2G010944	GO:0051087,GO:0001671
GRMZM2G010953	GO:0006468,GO:0005524,GO:0004672
GRMZM2G010960	GO:0008270
GRMZM2G010962	GO:0048544
GRMZM2G010987	GO:0016758,GO:0008152
GRMZM2G010991	GO:0006412,GO:0005840,GO:0005622,GO:0003735
GRMZM2G011015	GO:0005515,GO:0051087
GRMZM2G011022	GO:0005852,GO:0005737,GO:0003743
GRMZM2G011025	GO:0055114,GO:0016491,GO:0016209,GO:0006979,GO:0004602
GRMZM2G011030	GO:0005515
GRMZM2G011034	GO:0008380,GO:0005681
GRMZM2G011042	GO:0003824
GRMZM2G011068	GO:0006508,GO:0004176
GRMZM2G011070	GO:0005515,GO:0006468,GO:0004672
GRMZM2G011078	GO:0016021,GO:0015031
GRMZM2G011098	GO:0051861,GO:0046836,GO:0017089,GO:0005737
GRMZM2G011101	GO:0030126,GO:0016192,GO:0006886,GO:0005198,GO:0030117,GO:0005737
GRMZM2G011110	GO:0006355,GO:0003700
GRMZM2G011115	GO:0016020
GRMZM2G011129	GO:0003676
GRMZM2G011141	GO:0006629
GRMZM2G011151	GO:0016829,GO:0010333,GO:0008152
GRMZM2G011156	GO:0055114,GO:0020037,GO:0016705,GO:0005506
GRMZM2G011160	GO:0016887,GO:0005524,GO:0016021,GO:0006810,GO:0005215
GRMZM2G011176	GO:0071805,GO:0016020,GO:0015079
GRMZM2G011213	GO:0005759
GRMZM2G011219	GO:0030173,GO:0006891
GRMZM2G011236	GO:0006355,GO:0003700
GRMZM2G011240	GO:0016157,GO:0005985
GRMZM2G011253	GO:0006412,GO:0005840,GO:0005622,GO:0003735
GRMZM2G011269	GO:0016021
GRMZM2G011281	GO:0005515
GRMZM2G011315	GO:0006886,GO:0005622
GRMZM2G011319	GO:0005524
GRMZM2G011347	GO:0055085,GO:0016021,GO:0008308,GO:0006873
GRMZM2G011355	GO:0005525
GRMZM2G011401	GO:0005515
GRMZM2G011436	GO:0031047
GRMZM2G011447	GO:0004674
GRMZM2G011456	GO:0008168,GO:0006479,GO:0035246
GRMZM2G011463	GO:0009733
GRMZM2G011469	GO:0003950
GRMZM2G011473	GO:0008270,GO:0005515
GRMZM2G011479	GO:0016021
GRMZM2G011513	GO:0005515
GRMZM2G011518	GO:0007264,GO:0005525
GRMZM2G011526	GO:0006468,GO:0004672
GRMZM2G011559	GO:0006886
GRMZM2G011588	GO:0006355,GO:0003677
GRMZM2G011590	GO:0055085,GO:0016021,GO:0016020,GO:0006810,GO:0005215
GRMZM2G011592	GO:0055085,GO:0016021
GRMZM2G011598	GO:0006355,GO:0003677
GRMZM2G011624	GO:0008080
GRMZM2G011626	GO:0016020,GO:0008378,GO:0006486
GRMZM2G011627	GO:0005515
GRMZM2G011631	GO:0008270,GO:0006260,GO:0005634,GO:0003887
GRMZM2G011636	GO:0016192,GO:0016021
GRMZM2G011651	GO:0030244,GO:0016760,GO:0016020
GRMZM2G011655	GO:0016740,GO:0009058
GRMZM2G011662	GO:0016853,GO:0005975
GRMZM2G011708	GO:0055114,GO:0020037,GO:0006979,GO:0004601
GRMZM2G011743	GO:0016787
GRMZM2G011777	GO:0006461,GO:0005739
GRMZM2G011784	GO:0006508,GO:0004185
GRMZM2G011806	GO:0005515,GO:0006468,GO:0005524,GO:0004672
GRMZM2G011821	GO:0006468,GO:0004672
GRMZM2G011826	GO:0030598,GO:0017148
GRMZM2G011832	GO:0006355,GO:0003677
GRMZM2G011858	GO:0055114,GO:0016491
GRMZM2G011888	GO:0030246,GO:0005975
GRMZM2G011896	GO:0005515,GO:0006468,GO:0004672
GRMZM2G011915	GO:0016740,GO:0009058
GRMZM2G011919	GO:0007165
GRMZM2G011932	GO:0043565,GO:0006355,GO:0003700
GRMZM2G011951	GO:0009055
GRMZM2G012044	GO:0030244,GO:0016760,GO:0016020
GRMZM2G012062	GO:0006508,GO:0004252
GRMZM2G012071	GO:0006886,GO:0005737
GRMZM2G012117	GO:0006412,GO:0005840,GO:0003735
GRMZM2G012123	GO:0005515
GRMZM2G012140	GO:0005975,GO:0004553
GRMZM2G012143	GO:0030246,GO:0005975
GRMZM2G012167	GO:0016021,GO:0004252,GO:0006508
GRMZM2G012176	GO:0005515,GO:0006468,GO:0005524,GO:0004672
GRMZM2G012192	GO:0008152,GO:0003824
GRMZM2G012209	GO:0034715,GO:0034709,GO:0006884,GO:0006821,GO:0005886,GO:0005829,GO:0000387
GRMZM2G012220	GO:0005680
GRMZM2G012236	GO:0005975,GO:0004553
GRMZM2G012242	GO:0016020,GO:0006810,GO:0005215
GRMZM2G012243	GO:0051568,GO:0016575,GO:0005634
GRMZM2G012263	GO:0055114,GO:0020037,GO:0006979,GO:0004601
GRMZM2G012276	GO:0016491
GRMZM2G012280	GO:0008270,GO:0003676
GRMZM2G012306	GO:0016020,GO:0006810,GO:0005215
GRMZM2G012319	GO:0005515
GRMZM2G012326	GO:0006468,GO:0004672,GO:0005524
GRMZM2G012328	GO:0004857,GO:0042545,GO:0030599,GO:0005618
GRMZM2G012340	GO:0006457
GRMZM2G012355	GO:0008168
GRMZM2G012384	GO:0000160
GRMZM2G012391	GO:0055114,GO:0020037,GO:0016705,GO:0005506
GRMZM2G012393	GO:0005515
GRMZM2G012397	GO:0016020,GO:0015979,GO:0009522
GRMZM2G012399	GO:0008168,GO:0008152
GRMZM2G012404	GO:0003723,GO:0006418,GO:0005524,GO:0004812,GO:0000166,GO:0004831
GRMZM2G012416	GO:0005515
GRMZM2G012434	GO:0016020,GO:0006810,GO:0005215
GRMZM2G012453	GO:0005524,GO:0003676,GO:0004386
GRMZM2G012465	GO:0016887,GO:0005524,GO:0016020
GRMZM2G012472	GO:0006412,GO:0005840,GO:0005622,GO:0003735,GO:0006468,GO:0005524,GO:0004672
GRMZM2G012479	GO:0016491,GO:0055114,GO:0006979,GO:0004602
GRMZM2G012498	GO:0016788
GRMZM2G012501	GO:0030126,GO:0016192,GO:0006886,GO:0005198,GO:0030117
GRMZM2G012544	GO:0008270
GRMZM2G012584	GO:0005515
GRMZM2G012585	GO:0008168
GRMZM2G012600	GO:0048280,GO:0006886,GO:0005737,GO:0000139,GO:0016020,GO:0008565,GO:0048193
GRMZM2G012601	GO:0008234,GO:0006508
GRMZM2G012628	GO:0003676
GRMZM2G012631	GO:0051082,GO:0006950,GO:0006457,GO:0005524
GRMZM2G012636	GO:0009733
GRMZM2G012648	GO:0003924,GO:0007017,GO:0005874
GRMZM2G012685	GO:0005515,GO:0006468,GO:0005524,GO:0004672
GRMZM2G012717	GO:0008270,GO:0005622,GO:0005515
GRMZM2G012724	GO:0043565,GO:0006355,GO:0003700
GRMZM2G012732	GO:0016758,GO:0008152
GRMZM2G012758	GO:0005975,GO:0004553
GRMZM2G012806	GO:0009611,GO:0004867
GRMZM2G012814	GO:0005737,GO:0005094
GRMZM2G012821	GO:0005515
GRMZM2G012834	GO:0005515
GRMZM2G012861	GO:0005515,GO:0006468,GO:0004672
GRMZM2G012865	GO:0055114,GO:0020037,GO:0016705,GO:0005506
GRMZM2G012874	GO:0016020,GO:0015018
GRMZM2G012898	GO:0006355,GO:0005634,GO:0003700
GRMZM2G012910	GO:0033177,GO:0015991,GO:0015078
GRMZM2G012923	GO:0055085,GO:0016021,GO:0022857
GRMZM2G012928	GO:0009611,GO:0004867
GRMZM2G012932	GO:0005515
GRMZM2G012933	GO:0043531
GRMZM2G012942	GO:0016192,GO:0006904
GRMZM2G012958	GO:0007264,GO:0005525
GRMZM2G012964	GO:0003723
GRMZM2G012966	GO:0006950,GO:0006468,GO:0005524,GO:0004672
GRMZM2G012999	GO:0006355,GO:0005739,GO:0003690
GRMZM2G013010	GO:0016788
GRMZM2G013042	GO:0016491,GO:0008152
GRMZM2G013045	GO:0055114,GO:0050661,GO:0050660,GO:0004499
GRMZM2G013060	GO:0016787
GRMZM2G013065	GO:0003676
GRMZM2G013079	GO:0016020,GO:0008378,GO:0006486
GRMZM2G013082	GO:0055114,GO:0020037,GO:0016705,GO:0005506
GRMZM2G013114	GO:0008270,GO:0005634
GRMZM2G013115	GO:0009378,GO:0006310,GO:0006281
GRMZM2G013128	GO:0019538
GRMZM2G013152	GO:0019205,GO:0006139,GO:0005524
GRMZM2G013170	GO:0043531
GRMZM2G013176	GO:0005515
GRMZM2G013206	GO:0009055
GRMZM2G013214	GO:0055114,GO:0016491,GO:0008152
GRMZM2G013236	GO:0007165
GRMZM2G013255	GO:0005975,GO:0004560
GRMZM2G013283	GO:0005524,GO:0003676,GO:0004386
GRMZM2G013299	GO:0055114,GO:0016491,GO:0016209,GO:0006979,GO:0004602
GRMZM2G013318	GO:0005525
GRMZM2G013324	GO:0008081,GO:0006629,GO:0008889
GRMZM2G013331	GO:0030598,GO:0017148
GRMZM2G013342	GO:0015979,GO:0009538,GO:0009522
GRMZM2G013349	GO:0015780,GO:0005794
GRMZM2G013357	GO:0055114,GO:0020037,GO:0016705,GO:0005506
GRMZM2G013391	GO:0043565,GO:0006355,GO:0003700
GRMZM2G013398	GO:0008270,GO:0005622,GO:0005515
GRMZM2G013430	GO:0009001,GO:0006535,GO:0005737
GRMZM2G013448	GO:0055114,GO:0016491
GRMZM2G013456	GO:0055085,GO:0016020,GO:0006810,GO:0015171,GO:0003333
GRMZM2G013457	GO:0006412,GO:0005840,GO:0005622,GO:0003735
GRMZM2G013461	GO:0004869
GRMZM2G013465	GO:0008601,GO:0007165,GO:0000159
GRMZM2G013478	GO:0006241,GO:0006228,GO:0006183,GO:0006165,GO:0004550
GRMZM2G013496	GO:0055114,GO:0030976,GO:0006099,GO:0004591
GRMZM2G013530	GO:0016747
GRMZM2G013538	GO:0005975,GO:0004553
GRMZM2G013563	GO:0005515
GRMZM2G013588	GO:0006281
GRMZM2G013600	GO:0006351,GO:0003899,GO:0003677
GRMZM2G013607	GO:0051536,GO:0009055
GRMZM2G013612	GO:0000160
GRMZM2G013617	GO:0006355,GO:0003677
GRMZM2G013619	GO:0003676
GRMZM2G013625	GO:0005515
GRMZM2G013634	GO:0055114,GO:0016491
GRMZM2G013639	GO:0020037
GRMZM2G013652	GO:0006457,GO:0005737
GRMZM2G013657	GO:0006355,GO:0003700,GO:0007275
GRMZM2G013668	GO:0003676
GRMZM2G013688	GO:0046983
GRMZM2G013695	GO:0045454,GO:0015035,GO:0009055
GRMZM2G013712	GO:0020037,GO:0009055
[truncated: 17,805 more rows]

## Sheet: Table 7. Categories
Supplementary Table 7 - Example lists of custom categories (SM, TPS and CYP)
SM Category: Pfam domains commonly found in specialized metabolism (SM) pathways genes
Citation:	Wisecaver, Jennifer H., Alexander T. Borowsky, Vered Tzin, Georg Jander, Daniel J. Kliebenstein, and Antonis Rokas. 2017. “A Global Coexpression Network Approach for Connecting Genes to Specialized Metabolic Pathways in Plants.” The Plant Cell 29(5):944–59.
DOI:	doi: 10.1105/tpc.17.00009
Link:	http://www.plantcell.org/content/29/5/944
File:	Supplemental Dataset 6
TPS Category: Maize terpene synthase (TSP) gene family
Citation:	Ding, Yezhang, Philipp R. Weckwerth, Elly Poretsky, Katherine M. Murphy, James Sims, Evan Saldivar, Shawn A. Christensen, Si Nian Char, Bing Yang, Anh-dao Tong, Zhouxin Shen, Karl A. Kremling, Edward S. Buckler, Tom Kono, David R. Nelson, Jörg Bohlmann, Matthew G. Bakker, Martha M. Vaughan, Ahmed S. Khalil, Mariam Betsiashvili, Steven P. Briggs, Philipp Zerbe, Eric A. Schmelz, and Alisa Huffaker.…
DOI:	https://doi.org/10.1101/2020.03.04.977355
Link:	https://www.biorxiv.org/content/10.1101/2020.03.04.977355v1
File:	Supplementary Table 3
Notes:	(1) All RefGen_v4 TPS gene IDs were translated to RefGen_v3 gene IDs (https://maizegdb.org/gene_center/gene)
CYP Category: Maize cytochrome P450 (CYP) gene family
Citation:	Ding, Yezhang, Katherine M. Murphy, Elly Poretsky, Sibongile Mafu, Bing Yang, Si Nian Char, Shawn A. Christensen, Evan Saldivar, Mengxi Wu, Qiang Wang, Lexiang Ji, Robert J. Schmitz, Karl A. Kremling, Edward S. Buckler, Zhouxin Shen, Steven P. Briggs, Jörg Bohlmann, Andrew Sher, Gabriel Castro-Falcon, Chambers C. Hughes, Alisa Huffaker, Philipp Zerbe, and Eric A. Schmelz. 2019. “Multiple Genes Re…
DOI:	doi: 10.1038/s41477-019-0509-6
Link:	https://www.nature.com/articles/s41477-019-0509-6
File:	Supplementary Table 3
Notes:	(1) All RefGen_v4 CYP gene IDs were translated to RefGen_v3 gene IDs (https://maizegdb.org/gene_center/gene)
SM	TPS	CYP
PF00005	GRMZM2G074309	GRMZM2G079619
PF00017	GRMZM2G068808	GRMZM2G125482
PF00018	GRMZM2G465812	GRMZM2G013956
PF00067	GRMZM2G179092	GRMZM2G067225
PF00106	GRMZM2G127336	GRMZM2G123309
PF00107	GRMZM2G030583	GRMZM2G154828
PF00108	GRMZM2G390124	GRMZM2G094273
PF00109	GRMZM2G451187	GRMZM2G062946
PF00117	GRMZM2G093526	GRMZM5G830329
PF00118	AC217050.4_FG007	GRMZM5G894486
PF00144	GRMZM2G319445	GRMZM2G104877
PF00156	GRMZM2G044481	GRMZM2G034471
PF00168	GRMZM2G081554	GRMZM2G178351
PF00171	GRMZM2G011151	GRMZM2G025832
PF00185	AC214360.3_FG001	GRMZM2G047684
PF00195	GRMZM2G061023	GRMZM5G852663
PF00201	GRMZM2G127087	GRMZM2G163774
PF00202	GRMZM2G016254	GRMZM2G065635
PF00221	GRMZM2G084496	GRMZM2G363429
PF00232	GRMZM2G016922	GRMZM2G123037
PF00248	GRMZM2G010356	GRMZM5G875732
PF00264	GRMZM2G117319	GRMZM2G432167
PF00278	GRMZM2G038153	GRMZM2G140817
PF00282	AC205502.4_FG004	GRMZM2G140915
PF00288	GRMZM2G309126	GRMZM2G002178
PF00289	GRMZM2G177098	GRMZM2G096029
PF00290	GRMZM2G391312	GRMZM2G085845
PF00291	GRMZM2G093603	GRMZM2G066441
PF00293	GRMZM2G064406	GRMZM2G107322
PF00303	GRMZM2G028306	GRMZM2G106650
PF00305	GRMZM2G046615	GRMZM2G159807
PF00328	AC218998.2_FG011	GRMZM2G451939
PF00348	GRMZM2G445854	GRMZM2G012391
PF00368	GRMZM2G108609	GRMZM2G033098
PF00378	GRMZM2G061016	GRMZM2G138074
PF00387	GRMZM2G038340	AC200099.4_FG003
PF00388	GRMZM2G049538	AC200099.4_FG006
PF00407	GRMZM2G127087	GRMZM2G014580
PF00425		GRMZM2G058366
PF00432		GRMZM2G135387
PF00441		GRMZM2G399530
PF00450		GRMZM2G172491
PF00454		GRMZM2G066784
PF00459		GRMZM2G130755
PF00465		GRMZM2G070620
PF00478		GRMZM2G147245
PF00483		GRMZM2G167549
PF00487		GRMZM2G159353
PF00491		GRMZM2G126505
PF00494		GRMZM5G836610
PF00498		GRMZM5G886096
PF00501		GRMZM2G143202
PF00534		GRMZM2G085661
PF00535		GRMZM5G864903
PF00536		GRMZM2G106468
PF00550		GRMZM5G866027
PF00561		GRMZM2G091588
PF00583		GRMZM2G425127
PF00587		GRMZM2G075244
PF00596		GRMZM2G313750
PF00613		GRMZM2G422581
PF00617		GRMZM2G126055
PF00620		GRMZM2G315230
PF00668		AC234517.1_FG005
PF00682		GRMZM2G450231
PF00685		AC210173.4_FG005
PF00696		GRMZM2G113618
PF00698		GRMZM2G079484
PF00709		GRMZM2G397402
PF00724		GRMZM2G162737
PF00725		GRMZM2G028677
PF00732		GRMZM2G105185
PF00733		GRMZM2G022996
PF00743		GRMZM2G132478
PF00753		AC218998.2_FG001
PF00765		GRMZM2G147752
PF00766		GRMZM2G168392
PF00782		GRMZM2G122654
PF00788		GRMZM2G019666
PF00797		GRMZM6G859365
PF00800		GRMZM2G010221
PF00857		GRMZM2G014395
PF00891		GRMZM2G350020
PF00908		GRMZM2G020761
PF00941		GRMZM2G096086
PF00975		GRMZM2G057514
PF00982		GRMZM2G159179
PF01008		GRMZM2G013357
PF01012		GRMZM2G108698
PF01022		GRMZM2G138248
PF01040		GRMZM2G302074
PF01041		GRMZM2G054603
PF01048		GRMZM2G181192
PF01063		GRMZM2G030831
PF01066		GRMZM2G003796
PF01073		GRMZM2G161472
PF01118		GRMZM2G002142
PF01128		GRMZM2G170047
PF01148		GRMZM2G396248
PF01154		GRMZM2G065245
PF01222		GRMZM2G090432
PF01227		AC186603.6_FG003
PF01242		GRMZM2G476597
PF01243		GRMZM5G816561
PF01255		GRMZM2G121264
PF01315		GRMZM2G009232
PF01363		AC233853.1_FG003
PF01381		GRMZM2G100012
PF01397		GRMZM2G171139
PF01408		GRMZM2G167673
PF01467		GRMZM2G132450
PF01474		GRMZM2G103773
PF01477		GRMZM2G140448
PF01494		GRMZM2G100423
PF01501		GRMZM2G079298
PF01504		GRMZM2G087875
PF01575		GRMZM2G144407
PF01593		GRMZM2G015542
PF01596		GRMZM2G351259
PF01636		AC217947.4_FG002
PF01643		GRMZM2G394688
PF01658		GRMZM2G021310
PF01678		GRMZM2G085812
PF01729		GRMZM2G119067
PF01756		GRMZM2G089803
PF01761		GRMZM2G120621
PF01799		GRMZM2G024331
PF01817		GRMZM2G031909
PF01887		GRMZM2G123446
PF01959		GRMZM2G177668
PF02153		GRMZM2G026322
PF02211		GRMZM2G118809
PF02274		GRMZM2G164036
PF02353		GRMZM2G394783
PF02383		GRMZM2G031125
PF02401		GRMZM2G147119
PF02431		GRMZM2G032896
PF02441		GRMZM2G303426
PF02453		GRMZM2G102079
PF02458		GRMZM2G370519
PF02522		GRMZM2G062151
PF02542		GRMZM2G407650
PF02543		GRMZM2G167698
PF02567		GRMZM2G093195
PF02585		GRMZM2G321033
PF02595		GRMZM2G323830
PF02615		GRMZM2G176943
PF02655		GRMZM2G510303
PF02664		GRMZM2G129860
PF02668		GRMZM2G560358
PF02670		GRMZM5G899349
PF02729		GRMZM2G018612
PF02737		GRMZM2G162758
PF02738		GRMZM2G076936
PF02749		GRMZM2G135536
PF02770		GRMZM2G349187
PF02771		GRMZM2G137380
PF02784		AC202069.3_FG002
PF02785		GRMZM2G150907
PF02786		GRMZM2G049424
PF02797		GRMZM2G160763
PF02801		GRMZM2G148969
PF02803		GRMZM2G148052
PF02894		GRMZM2G177384
PF02900		GRMZM2G100158
PF02979		GRMZM2G154870
PF03033		GRMZM2G072653
PF03055		GRMZM2G131508
PF03061		GRMZM2G075461
PF03079		GRMZM2G181456
PF03088		GRMZM5G847159
PF03171		GRMZM2G057694
PF03241		GRMZM2G063756
PF03284		GRMZM2G102662
PF03301		GRMZM2G127972
PF03364		AC214524.3_FG002
PF03372		GRMZM2G167986
PF03417		GRMZM2G086489
PF03447		GRMZM2G312069
PF03450		GRMZM2G523371
PF03492		GRMZM2G134703
PF03559		GRMZM6G986387
PF03583		GRMZM2G023952
PF03621		GRMZM2G031364
PF03662		GRMZM2G068465
PF03770		GRMZM2G105469
PF03781		GRMZM2G110388
PF03936		GRMZM2G459563
PF03992		GRMZM2G084407
PF04055		GRMZM2G161169
PF04072		GRMZM2G147774
PF04107		GRMZM2G400129
PF04116		GRMZM2G056247
PF04199		GRMZM2G147467
PF04275		AC202122.2_FG001
PF04321		GRMZM6G235245
PF04339		GRMZM2G122498
PF04551		GRMZM2G012865
PF04655		GRMZM2G070109
PF04673		GRMZM2G106408
PF04715		GRMZM2G057086
PF04820		GRMZM2G377451
PF04863		GRMZM2G022947
PF04864		GRMZM2G104294
PF04909		GRMZM2G167336
PF05014		GRMZM2G021436
PF05116		GRMZM2G037781
PF05139		GRMZM2G026532
PF05199		GRMZM2G065928
PF05241		GRMZM2G102318
PF05368		GRMZM2G138008
PF05691		GRMZM2G107199
PF05711		GRMZM2G124972
PF05721		GRMZM2G035309
PF05770		GRMZM2G181236
PF05834		GRMZM2G027041
PF05995		GRMZM5G851862
PF06057		GRMZM2G376661
PF06090		GRMZM2G308666
PF06094		GRMZM2G104783
PF06351		GRMZM2G092823
PF06508		GRMZM2G168858
PF06602		GRMZM2G011156
PF07137		GRMZM2G067591
PF07143		GRMZM2G175250
PF07298		GRMZM5G822100
PF07366		GRMZM2G168016
PF07731		GRMZM2G083574
PF07859		GRMZM2G007698
PF07883		AC198752.4_FG004
PF07993		GRMZM2G363583
PF07994		AC209987.4_FG002
PF08031		GRMZM2G059308
PF08100		GRMZM2G446454
PF08241		GRMZM2G164074
PF08242		GRMZM2G148441
PF08392		GRMZM2G045319
PF08415		GRMZM2G329029
PF08421		GRMZM2G114988
PF08436		GRMZM2G180082
PF08484		GRMZM2G093286
PF08491		GRMZM2G015232
PF08498		GRMZM2G013082
PF08540		GRMZM2G168382
PF08541		GRMZM2G138750
PF08543		GRMZM5G810393
PF08544		GRMZM2G036257
PF08545		GRMZM2G069722
PF08659		GRMZM2G306998
PF08703		GRMZM2G424804
PF08892		GRMZM5G837869
PF08990		GRMZM2G169152
PF09277		GRMZM2G172826
PF09279		GRMZM2G075161
PF09788		GRMZM2G052825
PF10017		GRMZM2G179143
PF10397		GRMZM2G702529
PF10409		GRMZM2G384884
PF10590		GRMZM2G035073
PF10604		GRMZM2G419342
PF11468		GRMZM2G139874
PF11794		GRMZM2G057749
PF11991		GRMZM2G057208
PF12680		GRMZM2G039278
PF12681		GRMZM2G470442
PF12697		GRMZM2G089528
PF12804		GRMZM2G016264
PF12867		GRMZM2G370745
PF13186		GRMZM2G143235
PF13193		GRMZM2G100412
PF13243		GRMZM2G022904
PF13249		GRMZM2G179147
PF13277		GRMZM2G154752
PF13288		GRMZM2G055431
PF13292		AC210173.4_FG005
PF13323		GRMZM2G154652
PF13380		GRMZM2G070508
PF13419		GRMZM2G431288
PF13450		GRMZM2G401463
PF13508		GRMZM2G139467
PF13537		GRMZM2G171118
PF13579		GRMZM2G044636
PF13580		GRMZM5G884985
PF13847		GRMZM2G158342
PF14226		GRMZM2G133720
PF14299		GRMZM2G040728
PF14399		GRMZM2G105954
PF14749		GRMZM2G042543
PF14765		GRMZM2G020500
		GRMZM2G091822
		GRMZM2G010468
		GRMZM2G168404
		GRMZM2G074871
		AF546187.1_FG011

## Sheet: Table 8. Gene IDs for examples
Supplementary Table 8 - Genes used in the example workflows
Example Workflow 1
Bx1	GRMZM2G085381
Bx2	GRMZM2G085661
Bx3	GRMZM2G167549
Bx4	GRMZM2G172491
Bx5	GRMZM2G063756
Bx8	GRMZM2G085054
Bx9	GRMZM2G161335
Bx10	GRMZM2G311036
Bx11	GRMZM2G336824
Bx12	GRMZM2G023325
Bx13	AC148152.3_FG005
Bx14	GRMZM2G127418
Example Workflow 2
ZmAN2	GRMZM2G044481
